# Supplementary material for: The Arabidopsis gene co‐expression network
Source: PubMed Central journal article supplement — Plant Direct. 2022 Apr 26;6(4):e396. doi: 10.1002/pld3.396 (PMC9039629; doi:10.1002/pld3.396), 2022-04-26
Supplement: PLD3-6-e396-s029.pdf [file PLD3-6-e396-s029.pdf]

GO:0003674  
molecular\_function  
1.000000  
15 / 11263

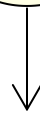

GO:0005488  
binding  
0.000582  
14 / 5710

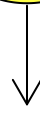

GO:0043167  
ion\_binding  
1.29e-11  
14 / 1569

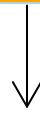

GO:0043169  
cation\_binding  
8.29e-15  
14 / 927

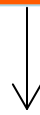

GO:0046872  
metal\_ion\_binding  
6.91e-15  
14 / 915

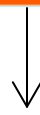

GO:0046914  
transition\_metal\_ion...  
1.05e-16  
14 / 679

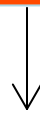

GO:0008270  
zinc\_ion\_binding  
3.19e-20  
14 / 383
