# Supplementary material for: The Arabidopsis gene co‐expression network
Source: PubMed Central journal article supplement — Plant Direct. 2022 Apr 26;6(4):e396. doi: 10.1002/pld3.396 (PMC9039629; doi:10.1002/pld3.396), 2022-04-26
Supplement: PLD3-6-e396-s068.pdf [file PLD3-6-e396-s068.pdf]

GO:0008150  
biological\_process  
684 / 11691

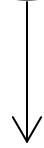

GO:0051179  
localization  
<1e-20  
196 / 1539

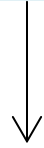

GO:0051234  
establishment of loc...  
<1e-20  
180 / 1432

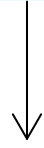

GO:0006810  
transport  
<1e-20  
178 / 1396

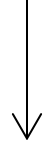

GO:0016192  
vesicle-mediated tra...  
<1e-20  
89 / 321

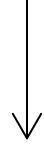

GO:0048193  
Golgi vesicle transp...  
<1e-20  
50 / 131
