# Supplementary material for: The Arabidopsis gene co‐expression network
Source: PubMed Central journal article supplement — Plant Direct. 2022 Apr 26;6(4):e396. doi: 10.1002/pld3.396 (PMC9039629; doi:10.1002/pld3.396), 2022-04-26
Supplement: PLD3-6-e396-s191.pdf [file PLD3-6-e396-s191.pdf]

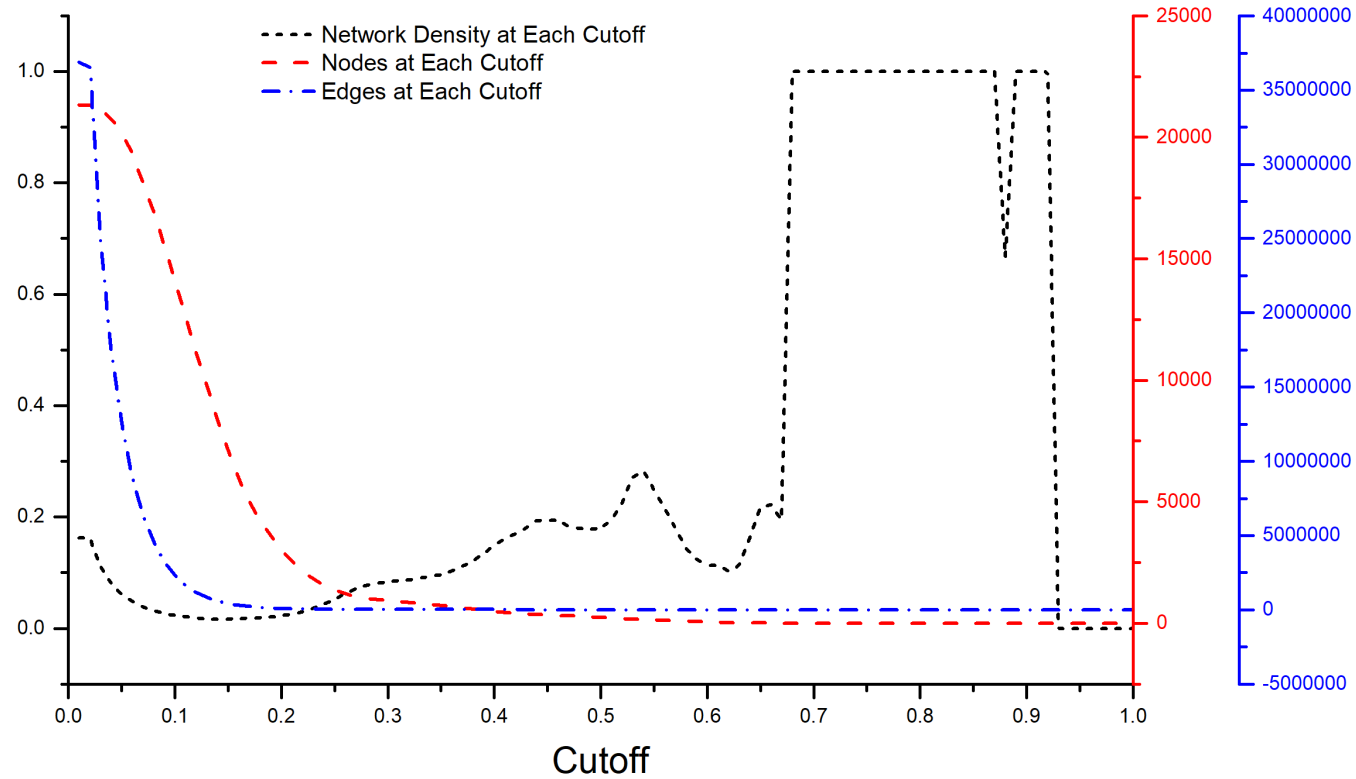

**Supplementary Figure S1: Selection of cutoff values.** The number of nodes (red), number of edges (blue) and network density are represented as a function of cutoff value. Only edges with value greater than the cutoff value were used to visualize the co-expression network. Only nodes connected by these edges were used in our network analysis. The corresponding network densities at different cutoff values are shown in black dashed line.
