# Supplementary material for: The Arabidopsis gene co‐expression network
Source: PubMed Central journal article supplement — Plant Direct. 2022 Apr 26;6(4):e396. doi: 10.1002/pld3.396 (PMC9039629; doi:10.1002/pld3.396), 2022-04-26
Supplement: PLD3-6-e396-s262.pdf [file PLD3-6-e396-s262.pdf]

GO:0003674  
molecular\_function  
1.0000  
177 / 11263

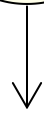

GO:0005488  
binding  
0.0054  
107 / 5710

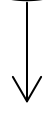

GO:0043167  
ion binding  
1.03e-20  
75 / 1569

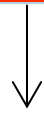

GO:0043169  
cation binding  
< 1e-20  
61 / 927

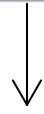

GO:0046872  
metal ion binding  
< 1e-20  
61 / 915

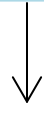

GO:0046914  
transition metal ion...

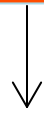

GO:0005507  
copper ion binding  
2.31e-19  
24 / 130
