# Supplementary material for: The Arabidopsis gene co‐expression network
Source: PubMed Central journal article supplement — Plant Direct. 2022 Apr 26;6(4):e396. doi: 10.1002/pld3.396 (PMC9039629; doi:10.1002/pld3.396), 2022-04-26
Supplement: PLD3-6-e396-s307.pdf [file PLD3-6-e396-s307.pdf]

GO:0003674  
molecular\_function  
1.00000  
41 / 11263

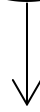

GO:0003824  
catalytic activity  
2.94e-05  
31 / 4901

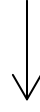

GO:0016740  
transferase activity  
0.00163  
16 / 2078

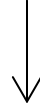

GO:0016746  
transferase activity...  
1.09e-07  
9 / 231

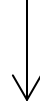

GO:0016747  
transferase activity...  
4.41e-08  
9 / 208

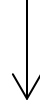

GO:0004312  
fatty acid synthase ...  
4.67e-12  
5 / 14

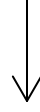

GO:0004315  
3-oxoacyl-[acyl-carr...  
7.72e-05  
2 / 4
