# Supplementary figures and images for: The Arabidopsis gene co‐expression network (part 1 of 2)
Source: PubMed Central journal article supplement — Plant Direct. 2022 Apr 26;6(4):e396. doi: 10.1002/pld3.396 (PMC9039629; doi:10.1002/pld3.396), 2022-04-26

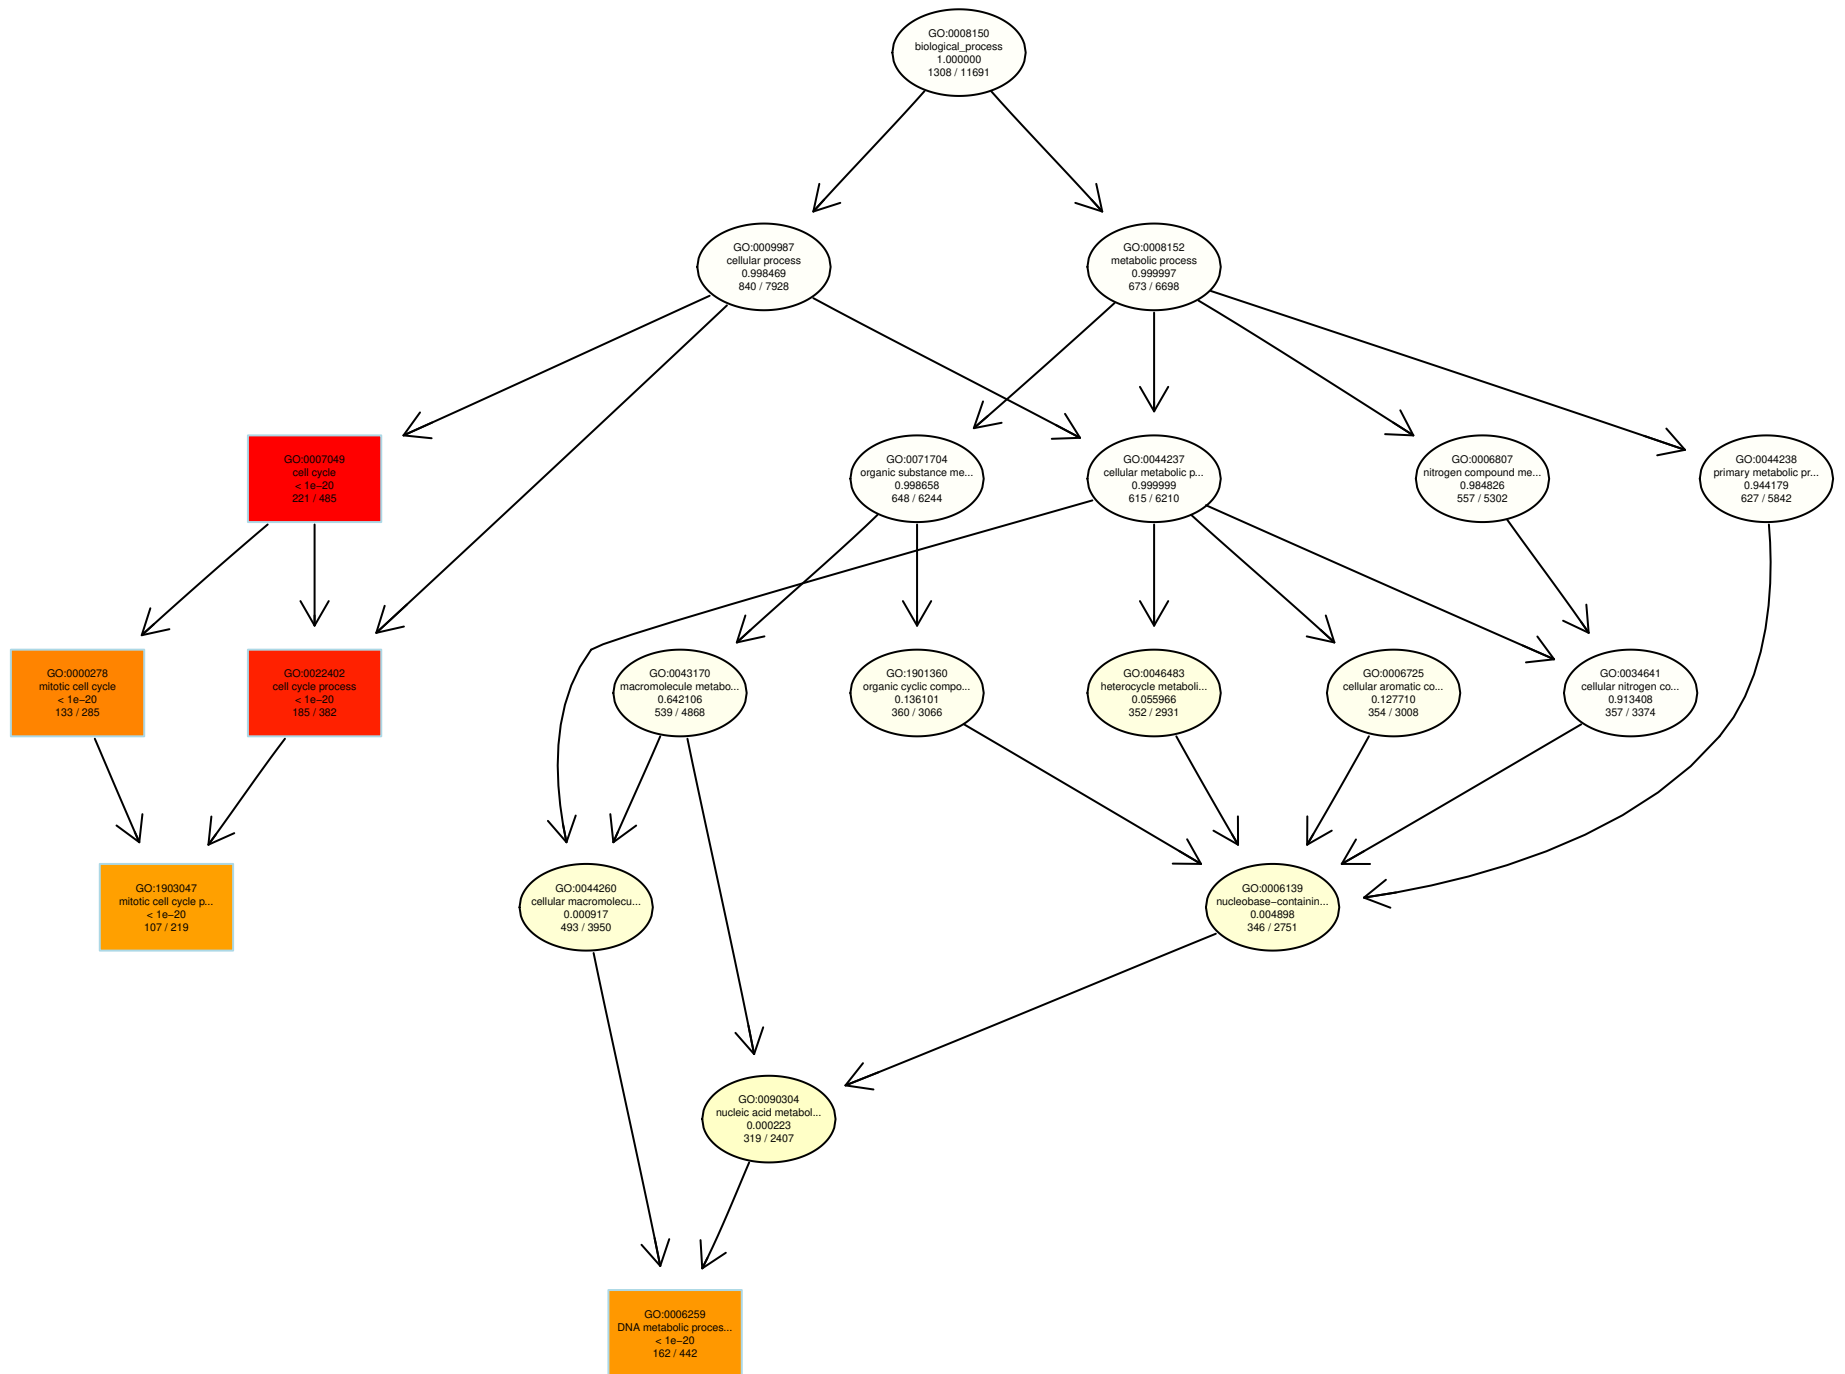

Supplement: PLD3-6-e396-s003.pdf [file PLD3-6-e396-s003.pdf]

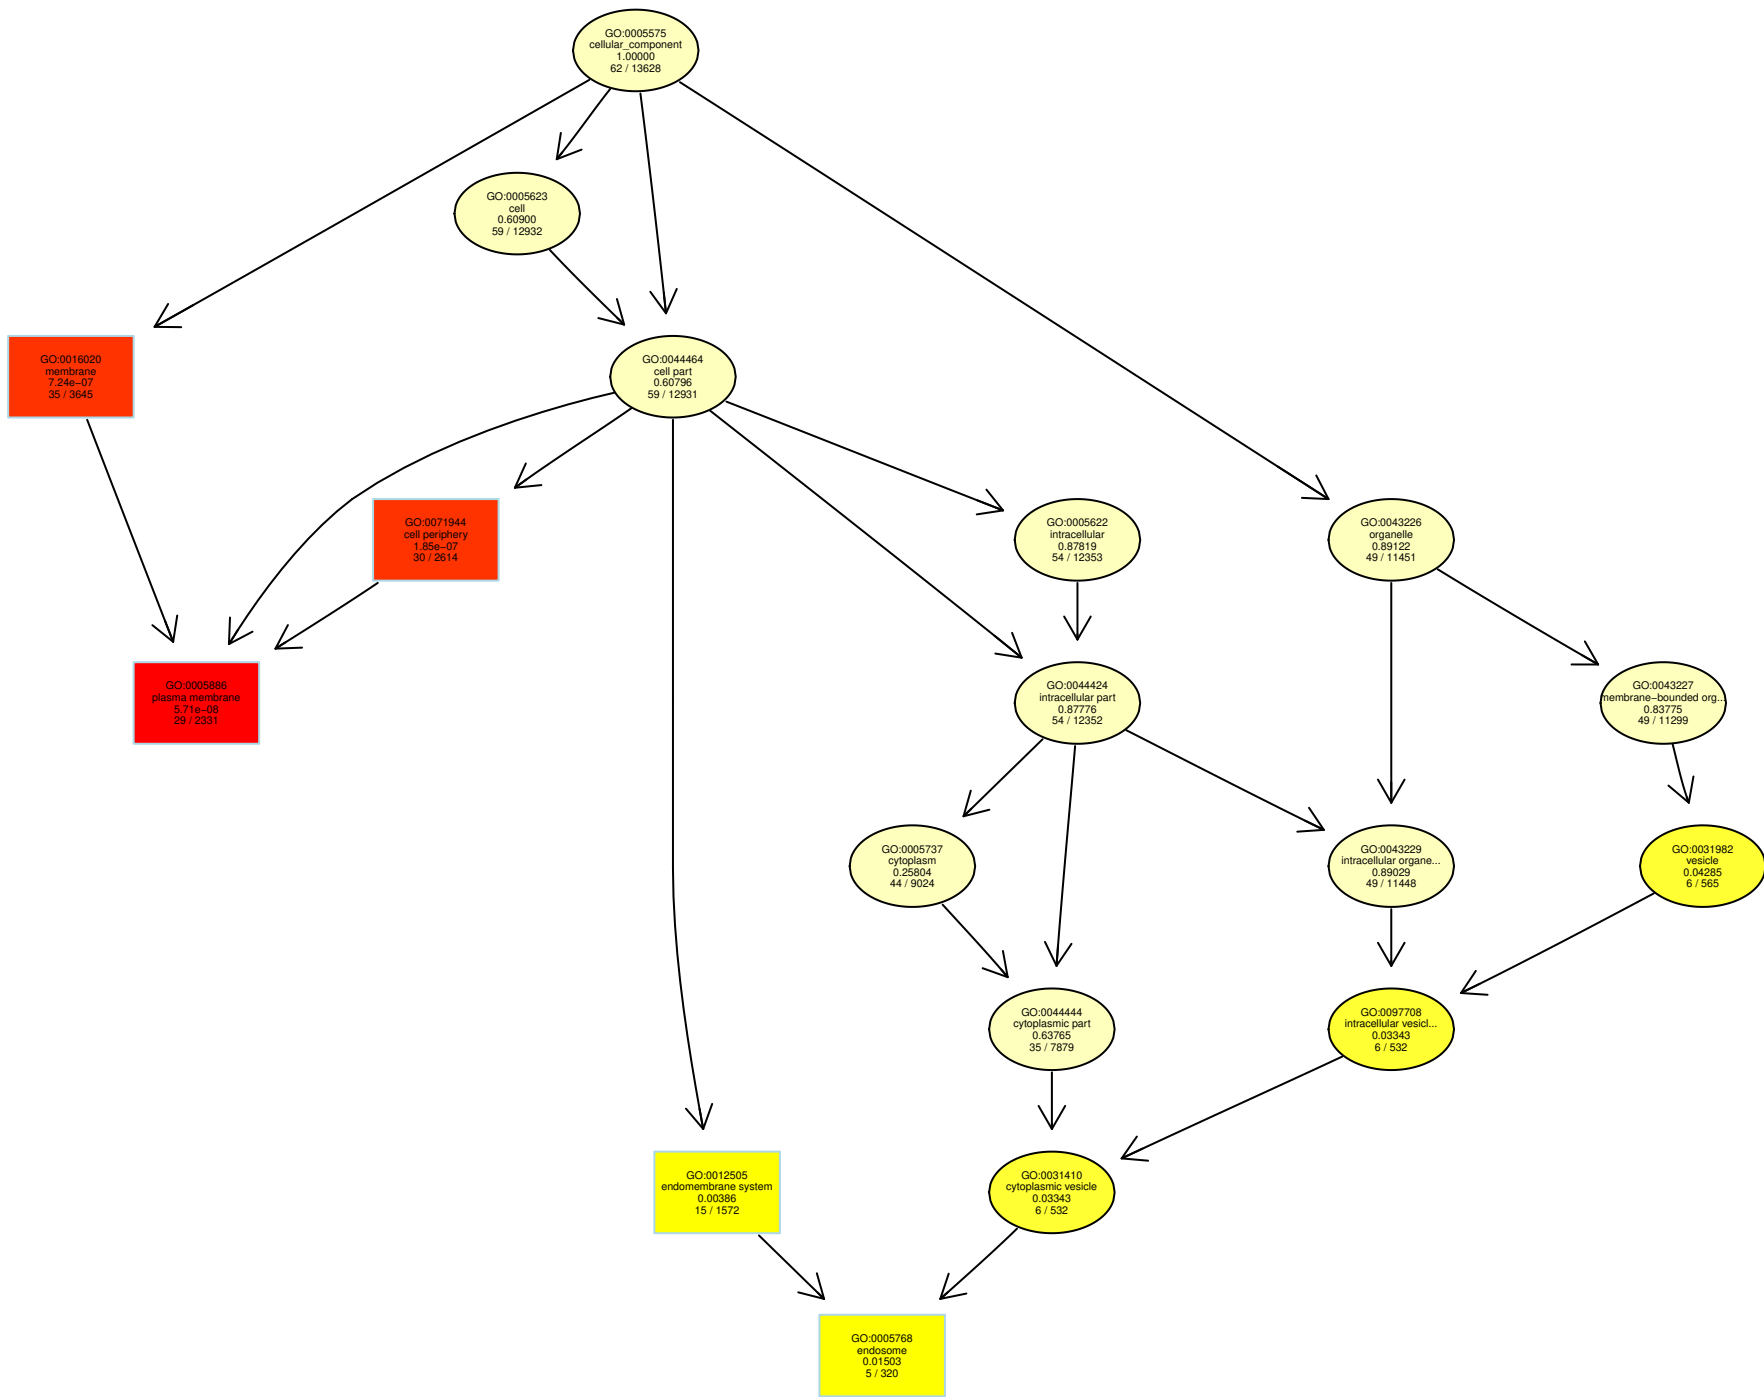

Supplement: PLD3-6-e396-s007.pdf [file PLD3-6-e396-s007.pdf]

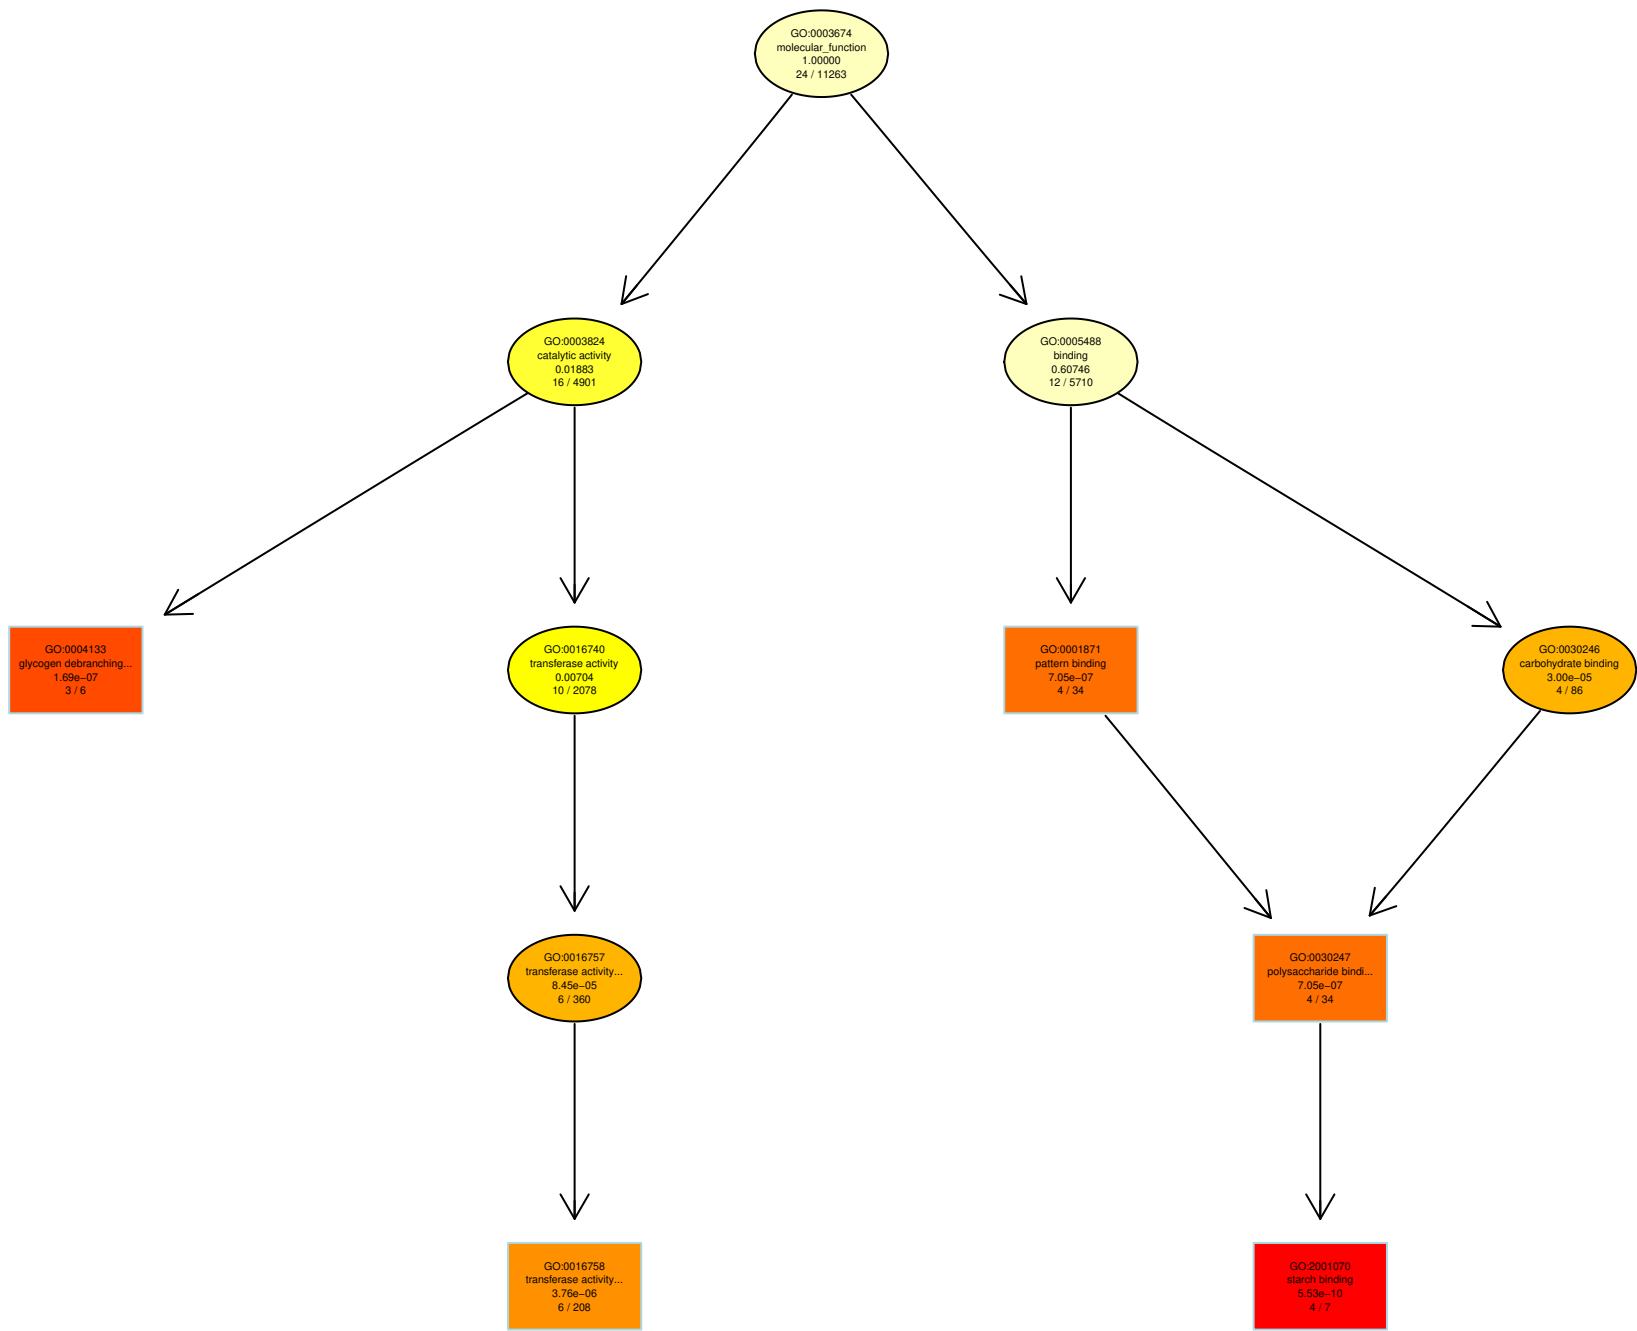

Supplement: PLD3-6-e396-s008.pdf [file PLD3-6-e396-s008.pdf]

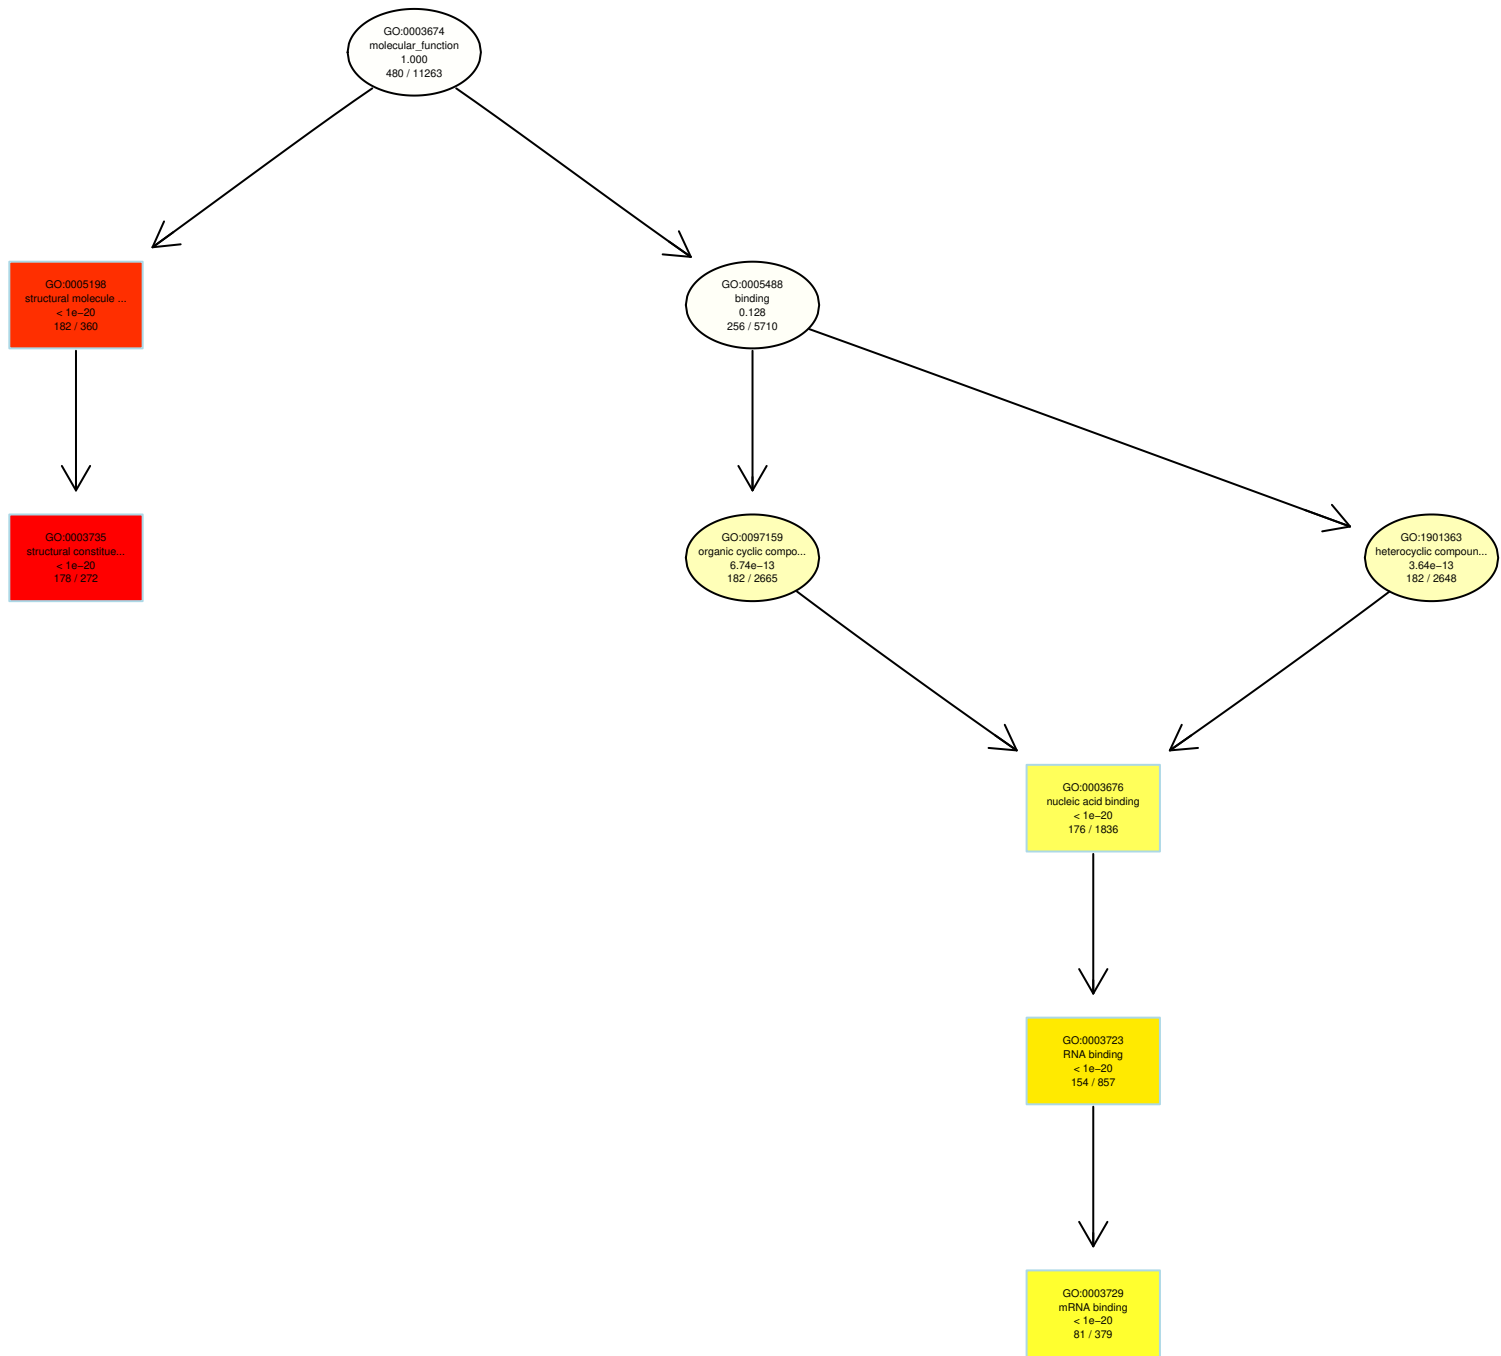

Supplement: PLD3-6-e396-s009.pdf [file PLD3-6-e396-s009.pdf]

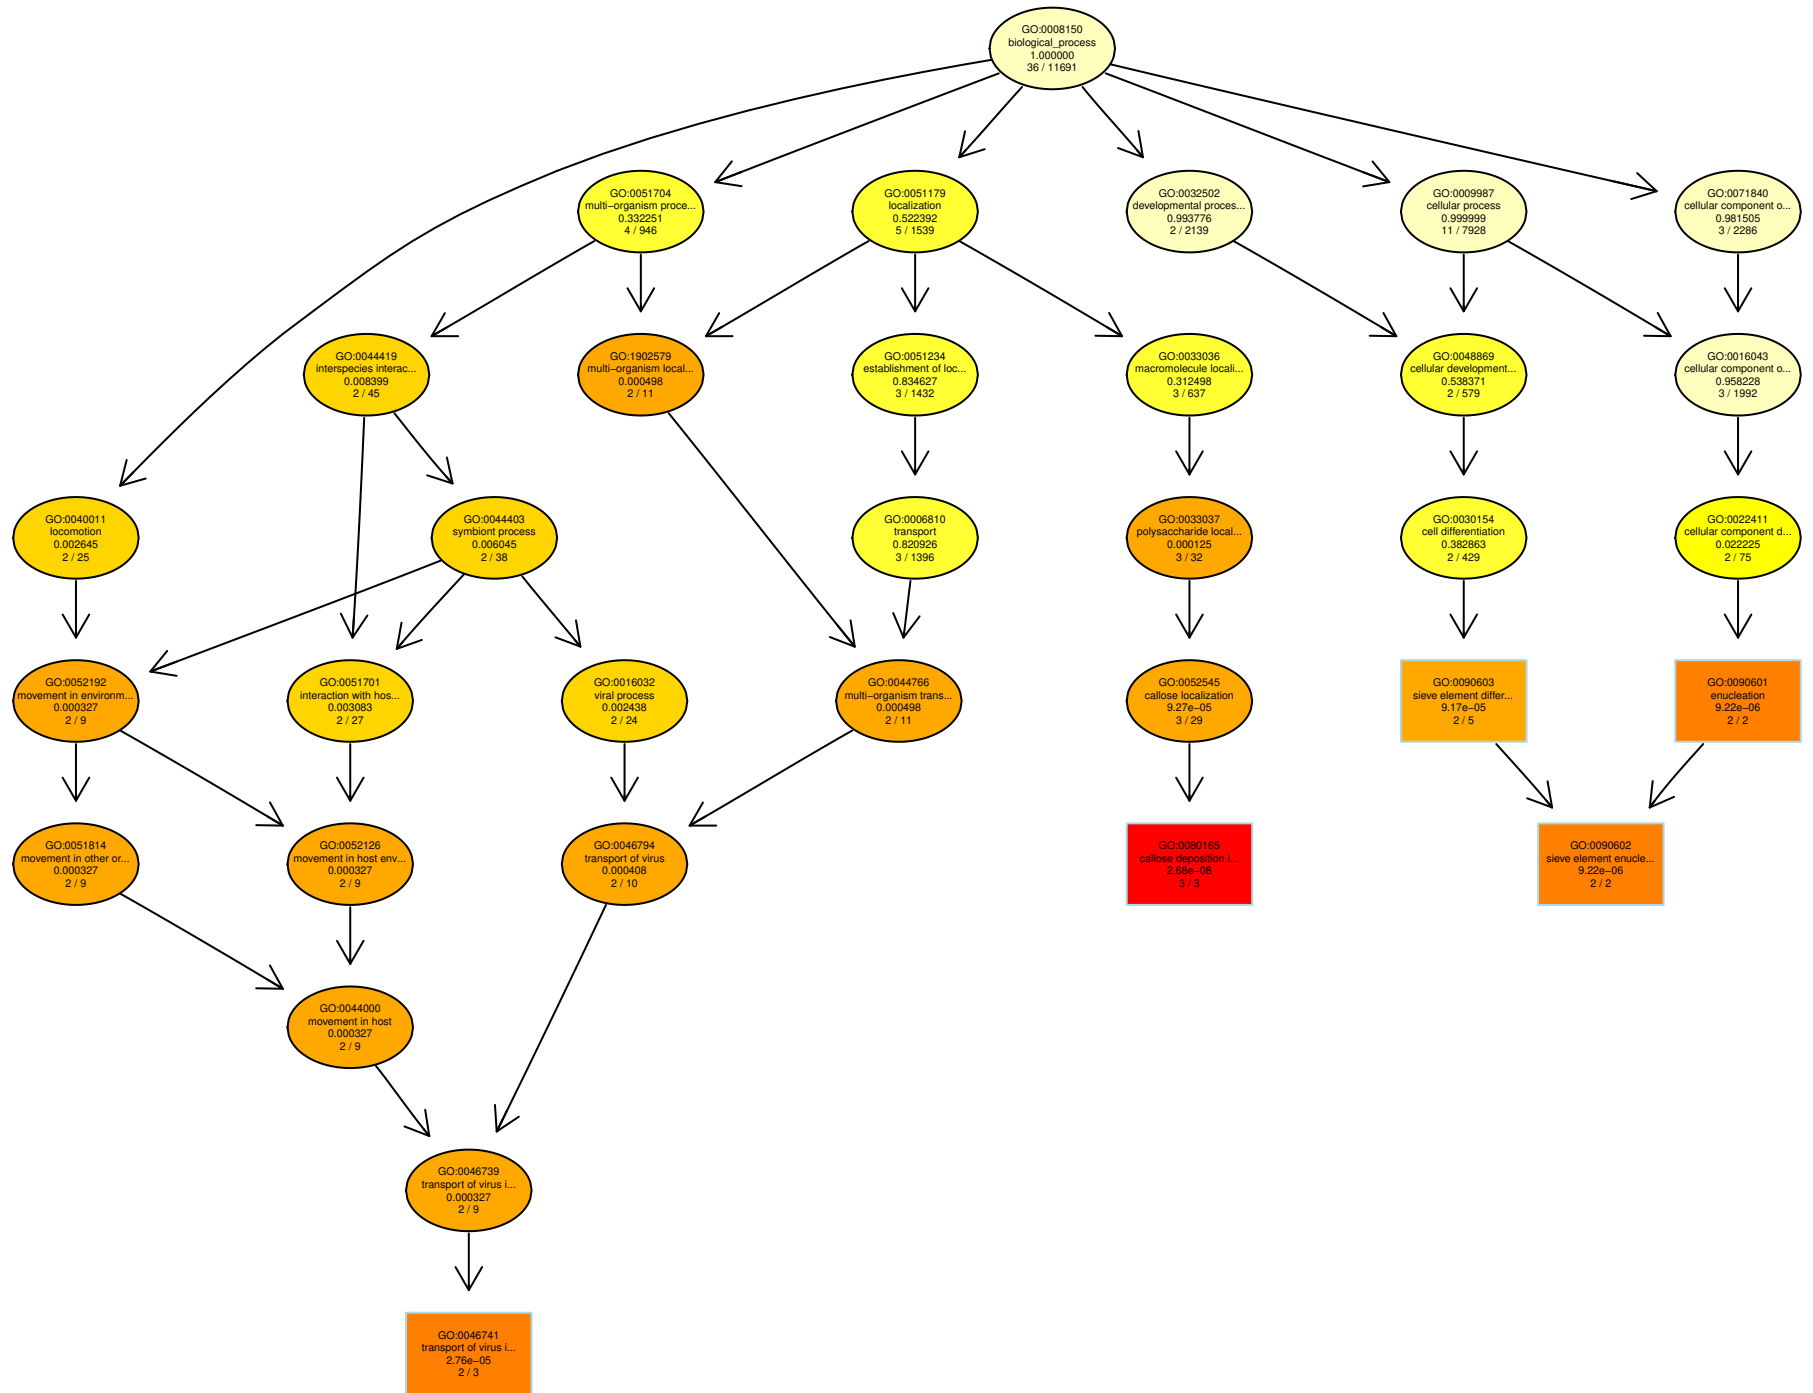

Supplement: PLD3-6-e396-s010.pdf [file PLD3-6-e396-s010.pdf]

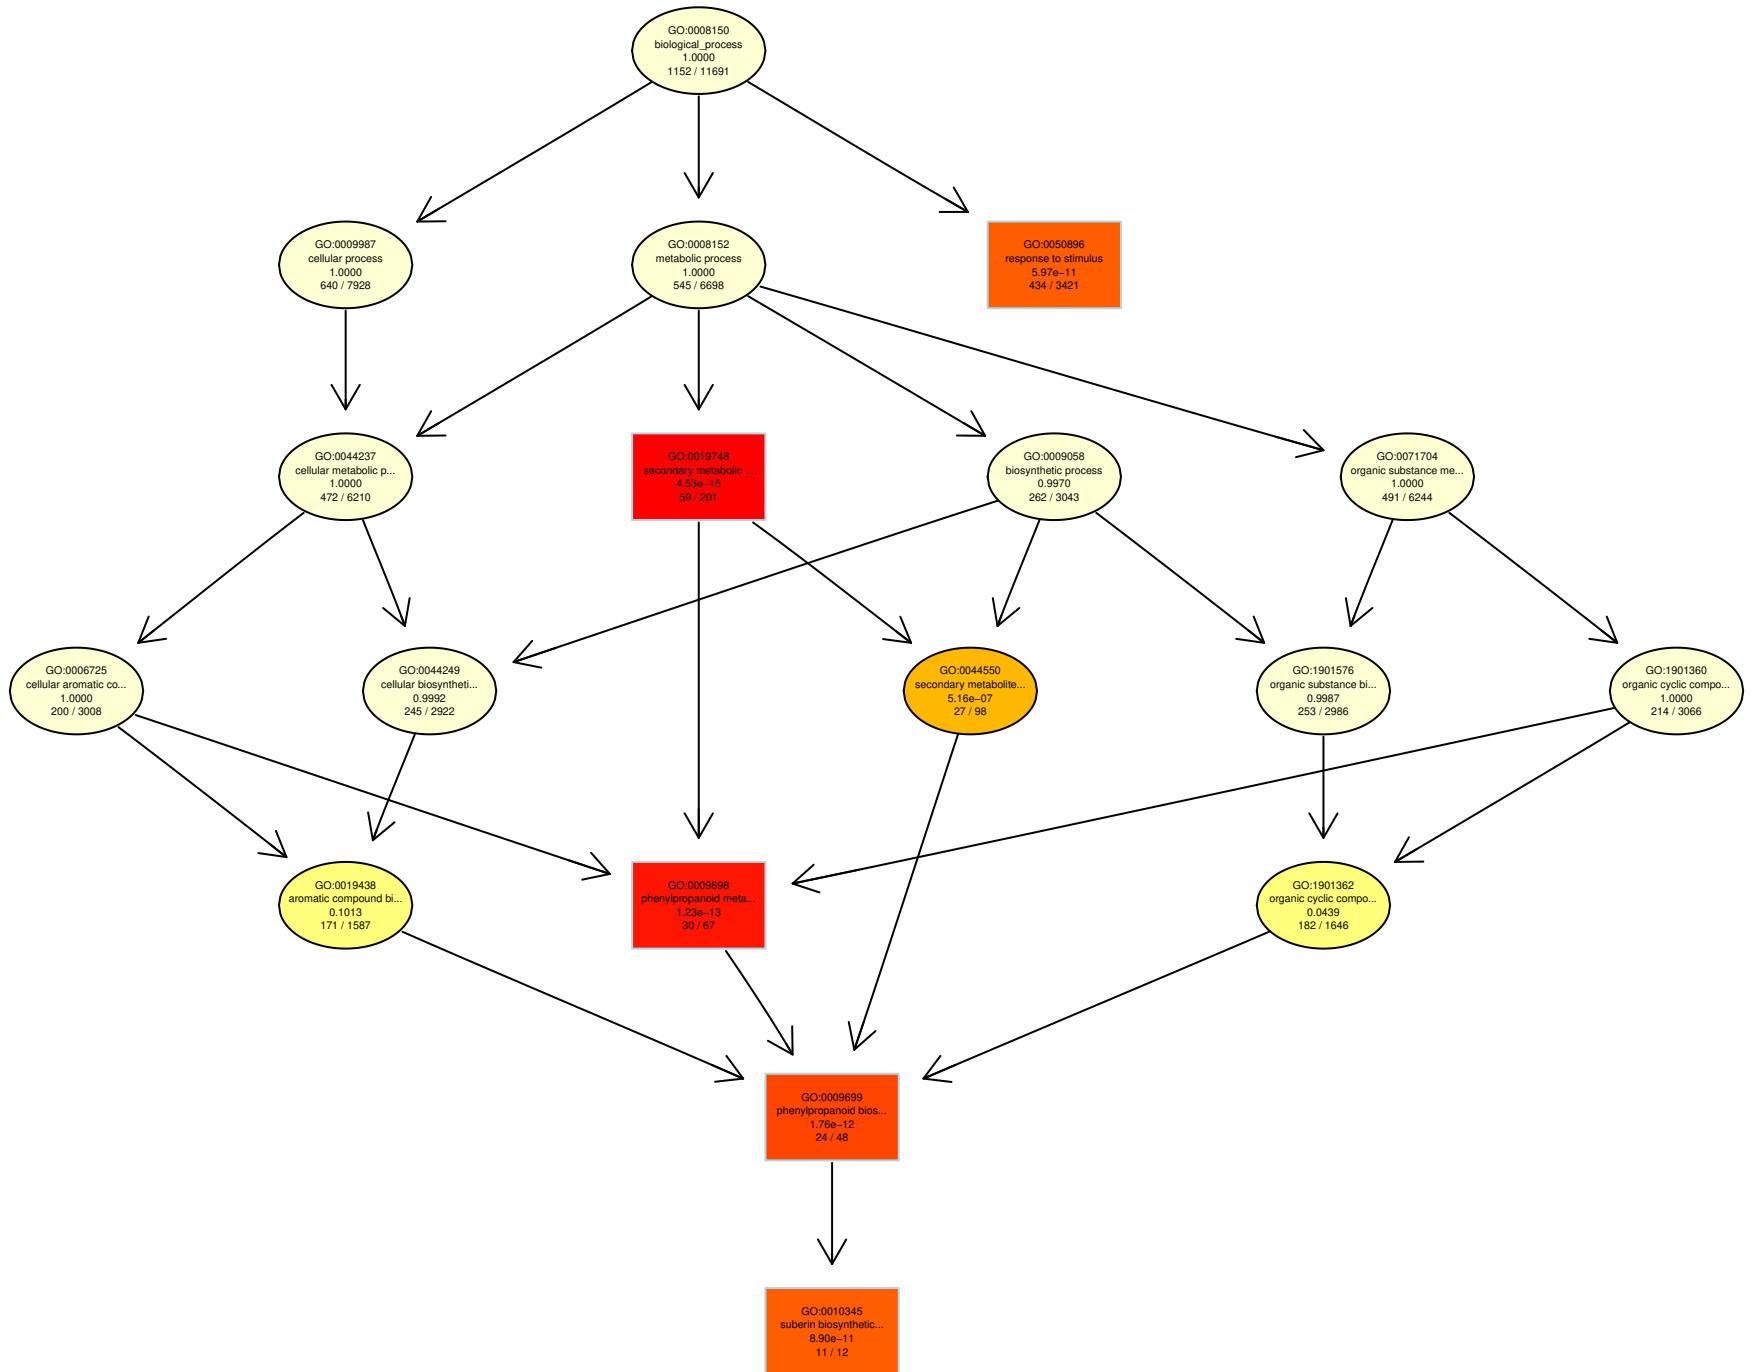

Supplement: PLD3-6-e396-s012.pdf [file PLD3-6-e396-s012.pdf]

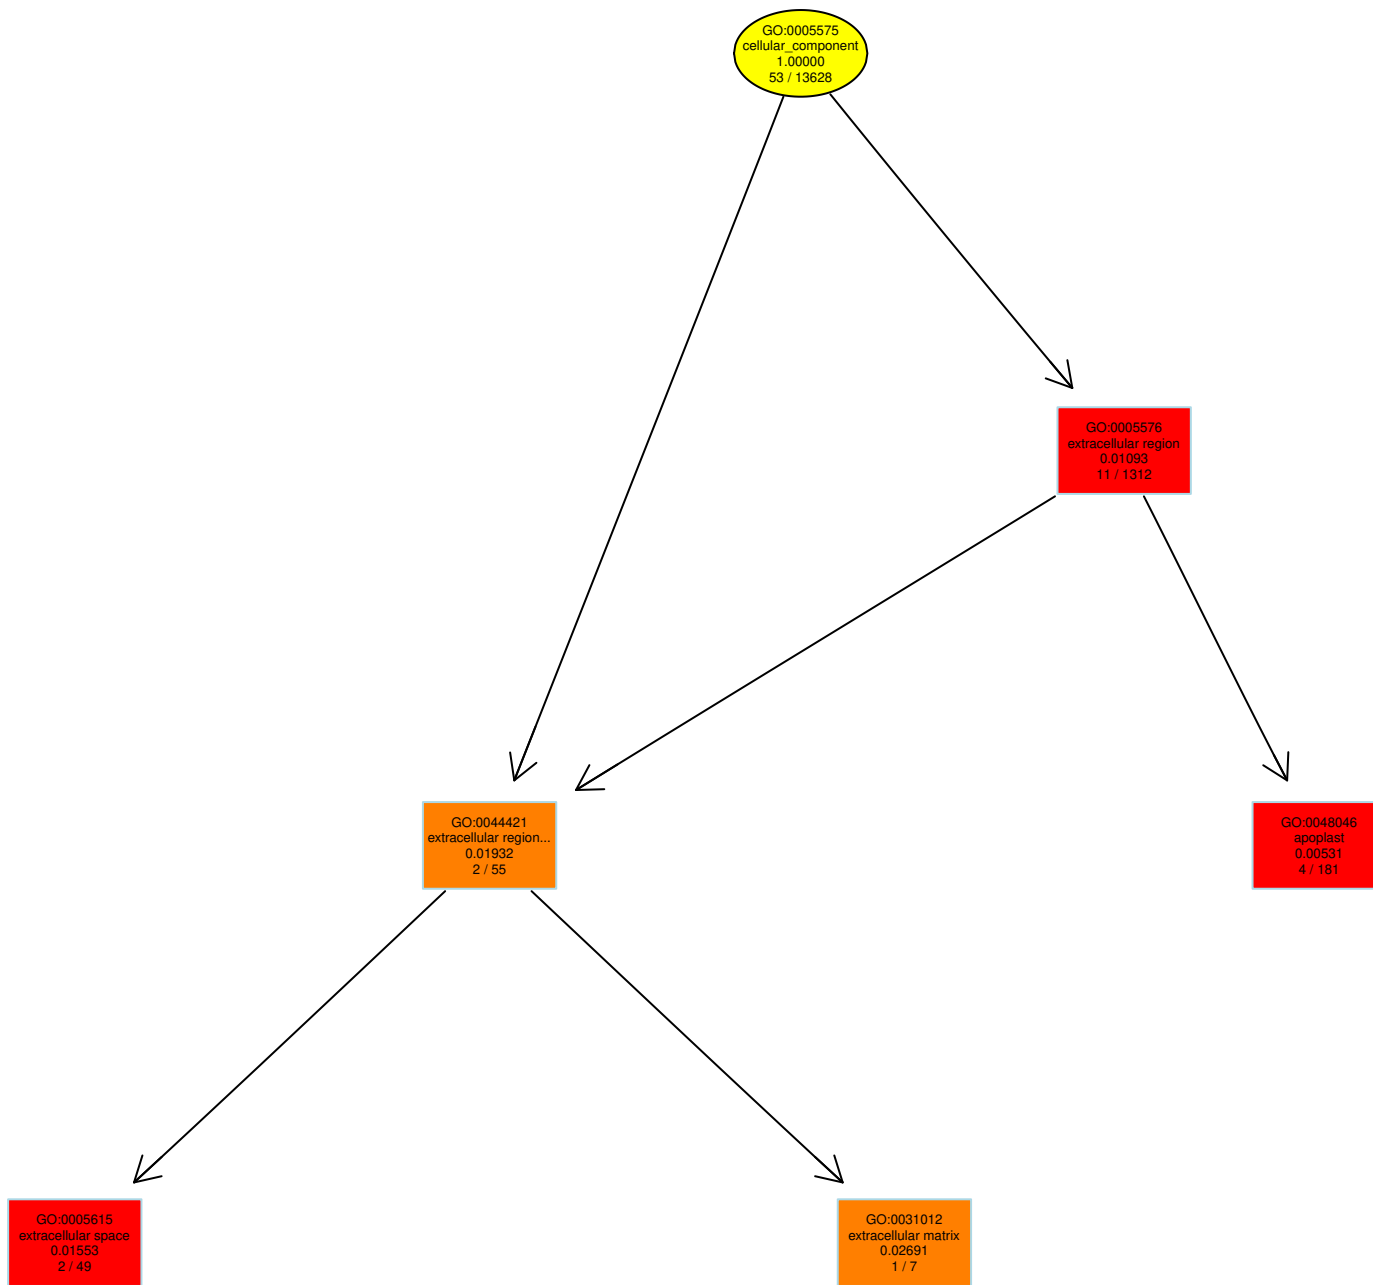

Supplement: PLD3-6-e396-s013.pdf [file PLD3-6-e396-s013.pdf]

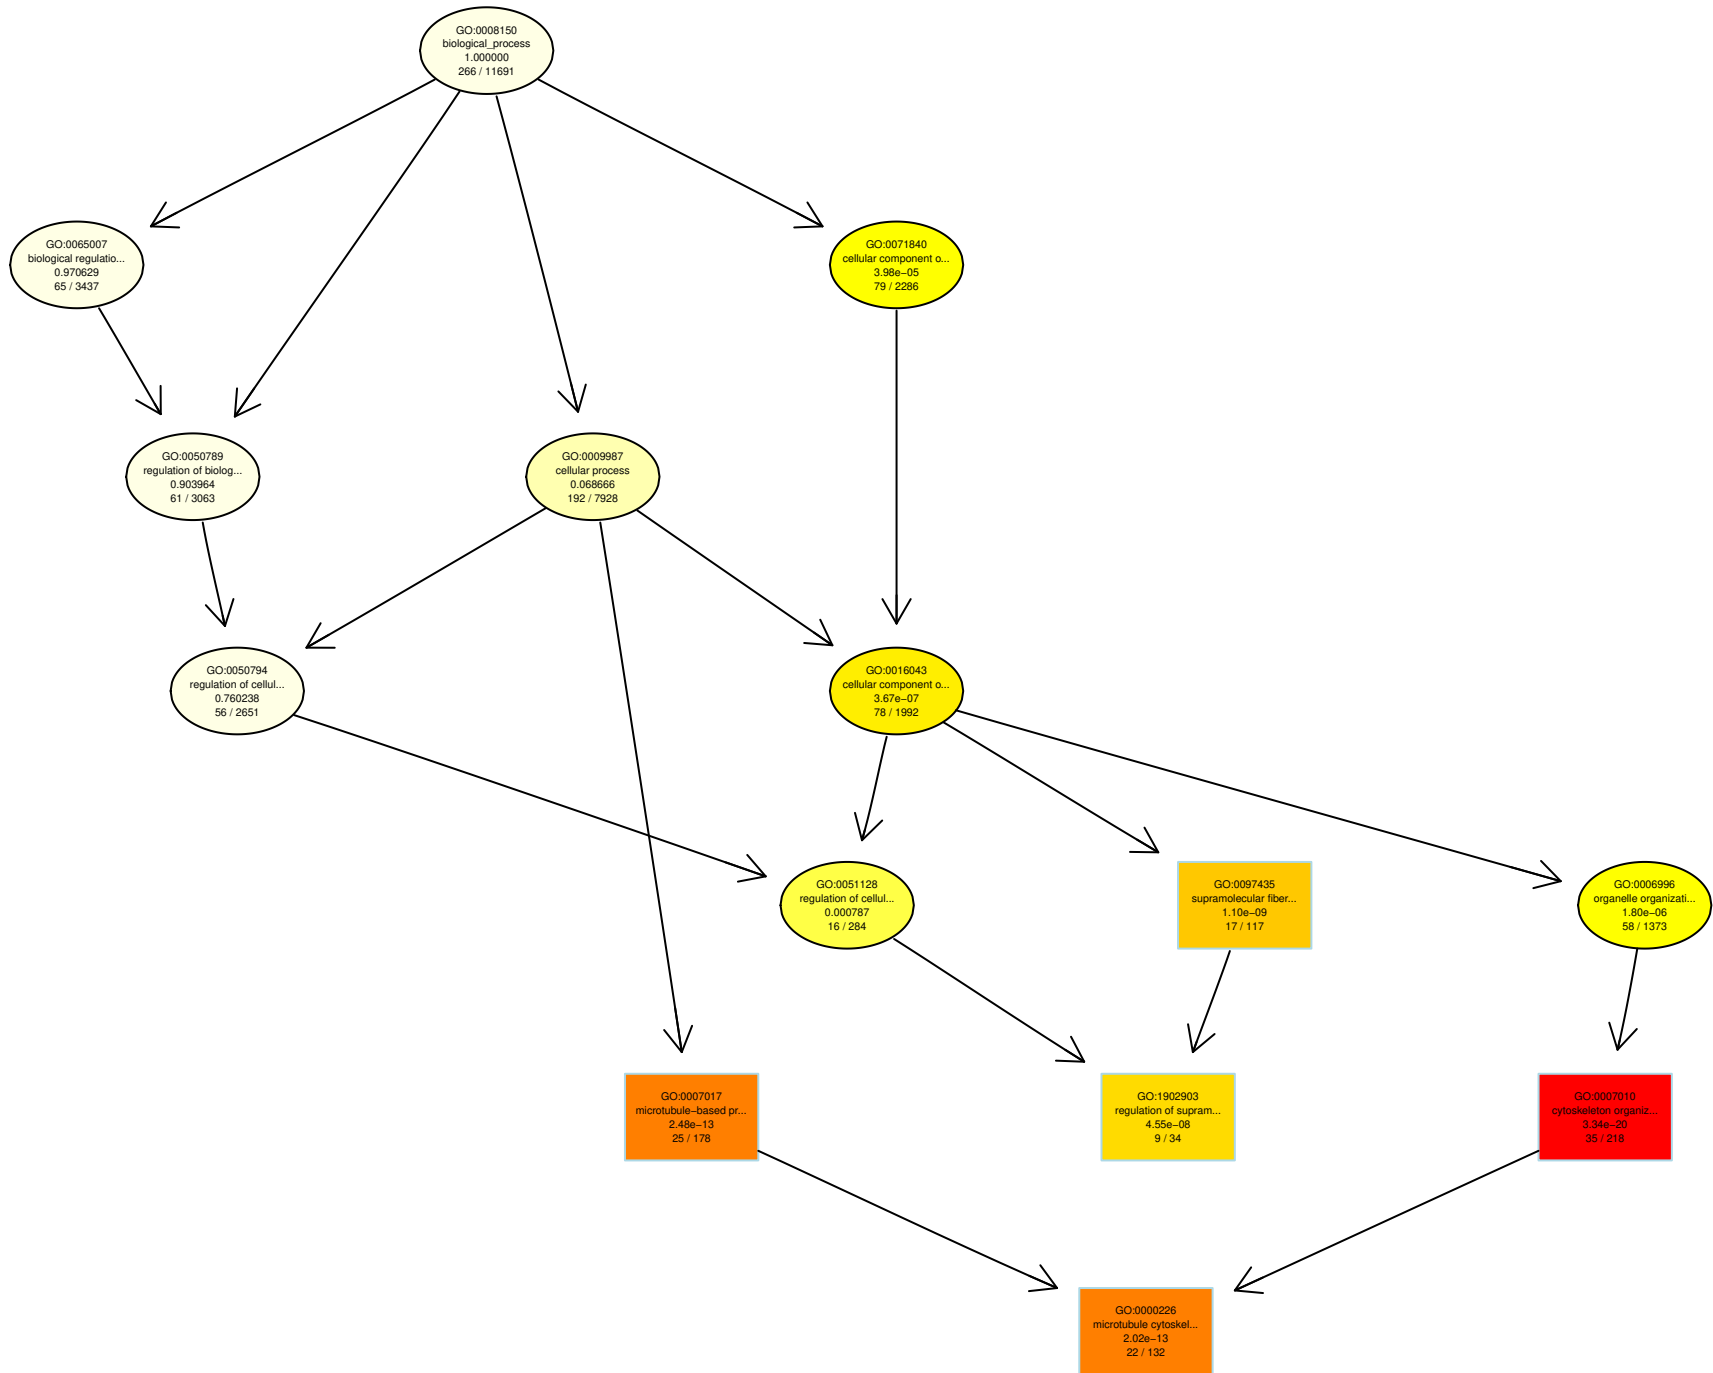

Supplement: PLD3-6-e396-s014.pdf [file PLD3-6-e396-s014.pdf]

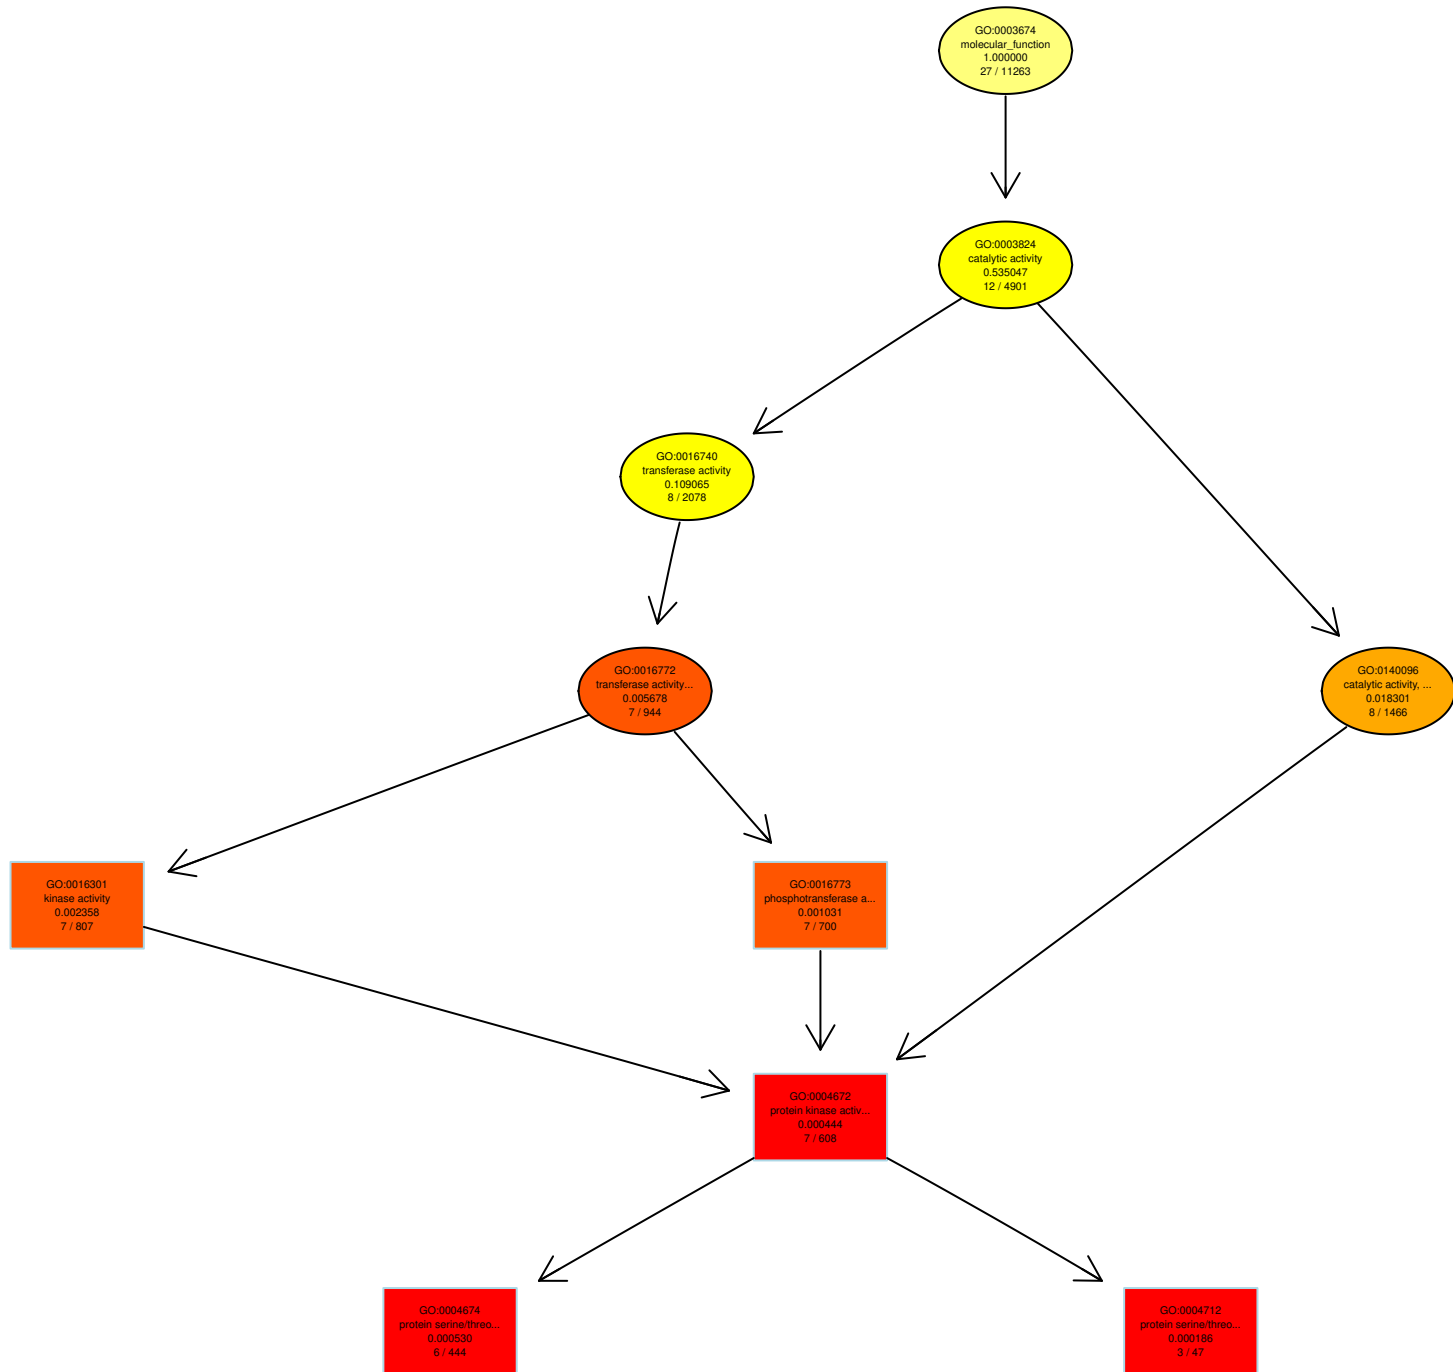

Supplement: PLD3-6-e396-s017.pdf [file PLD3-6-e396-s017.pdf]

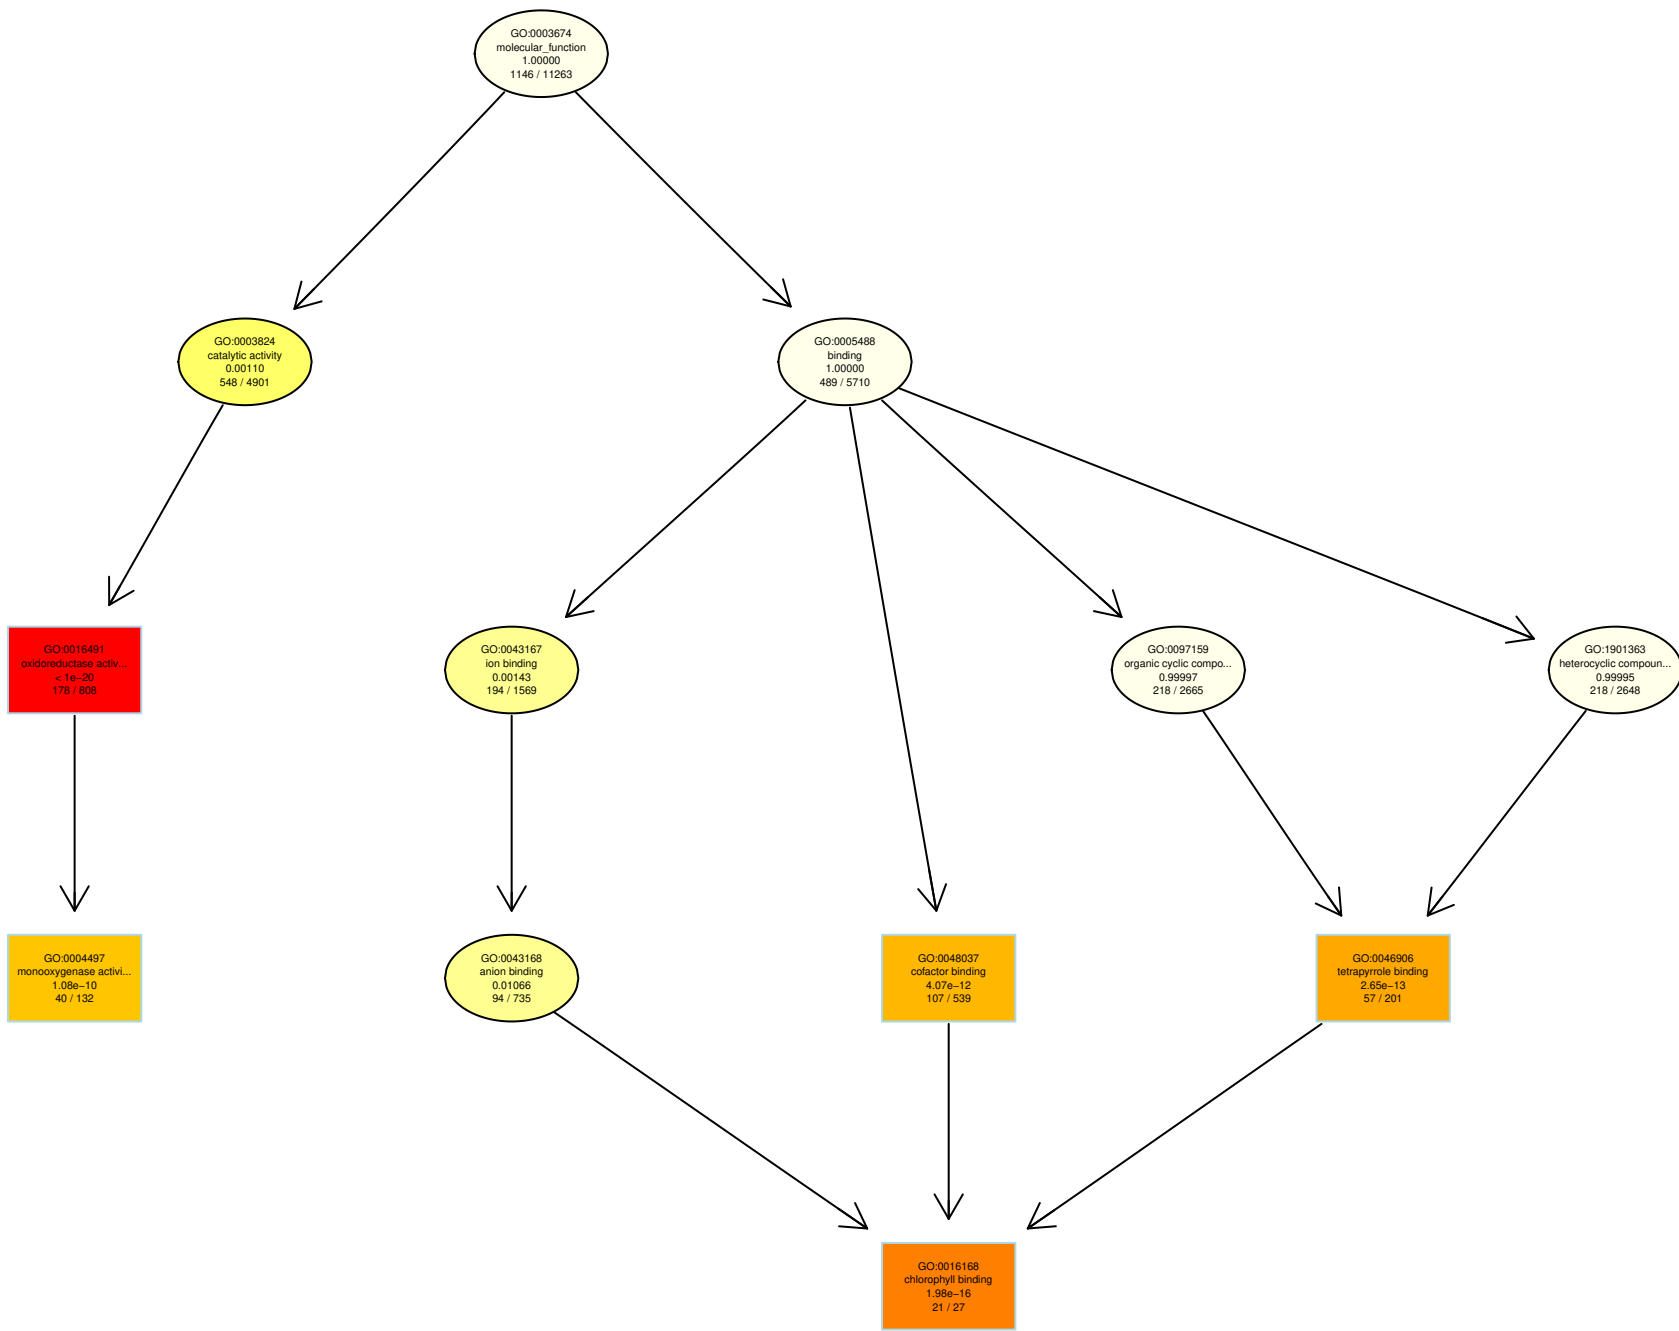

Supplement: PLD3-6-e396-s020.pdf [file PLD3-6-e396-s020.pdf]

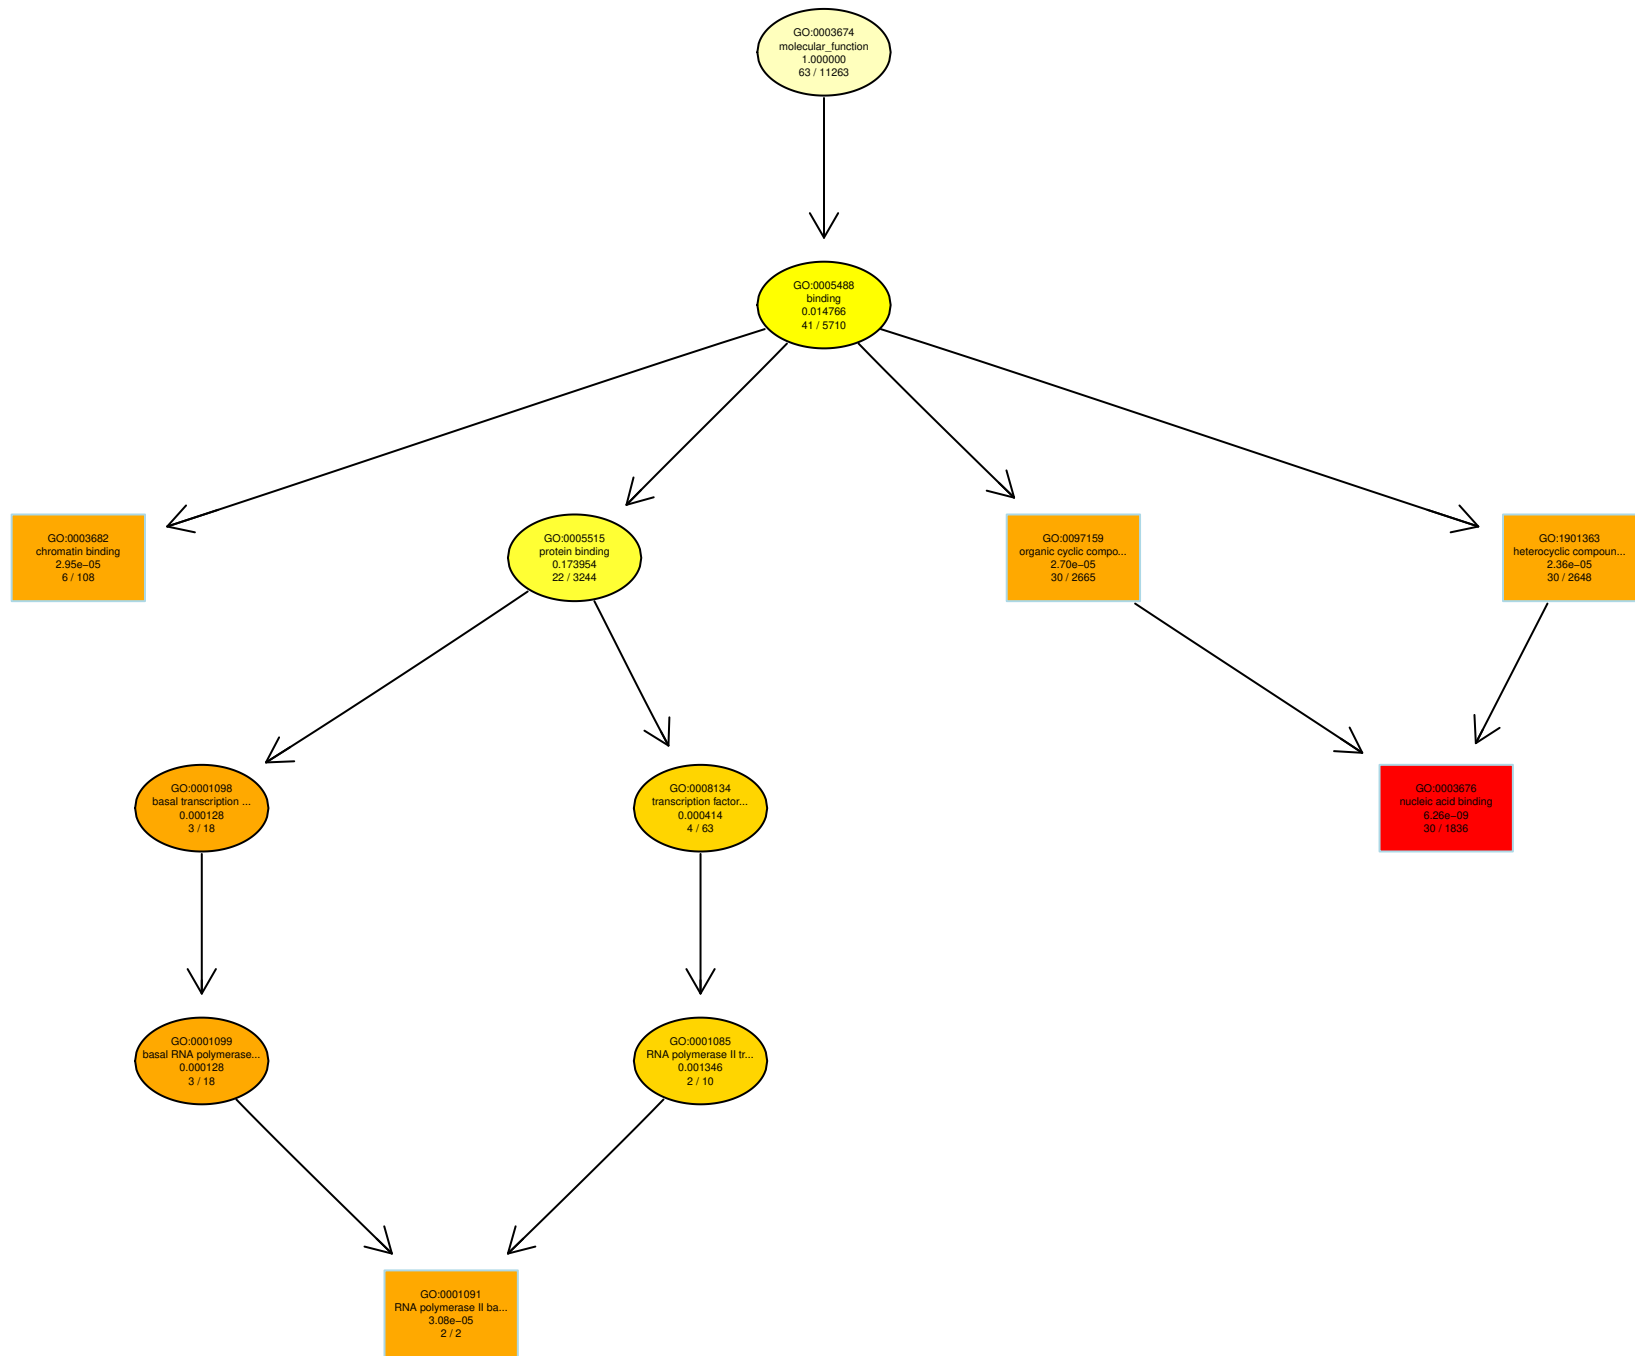

Supplement: PLD3-6-e396-s031.pdf [file PLD3-6-e396-s031.pdf]

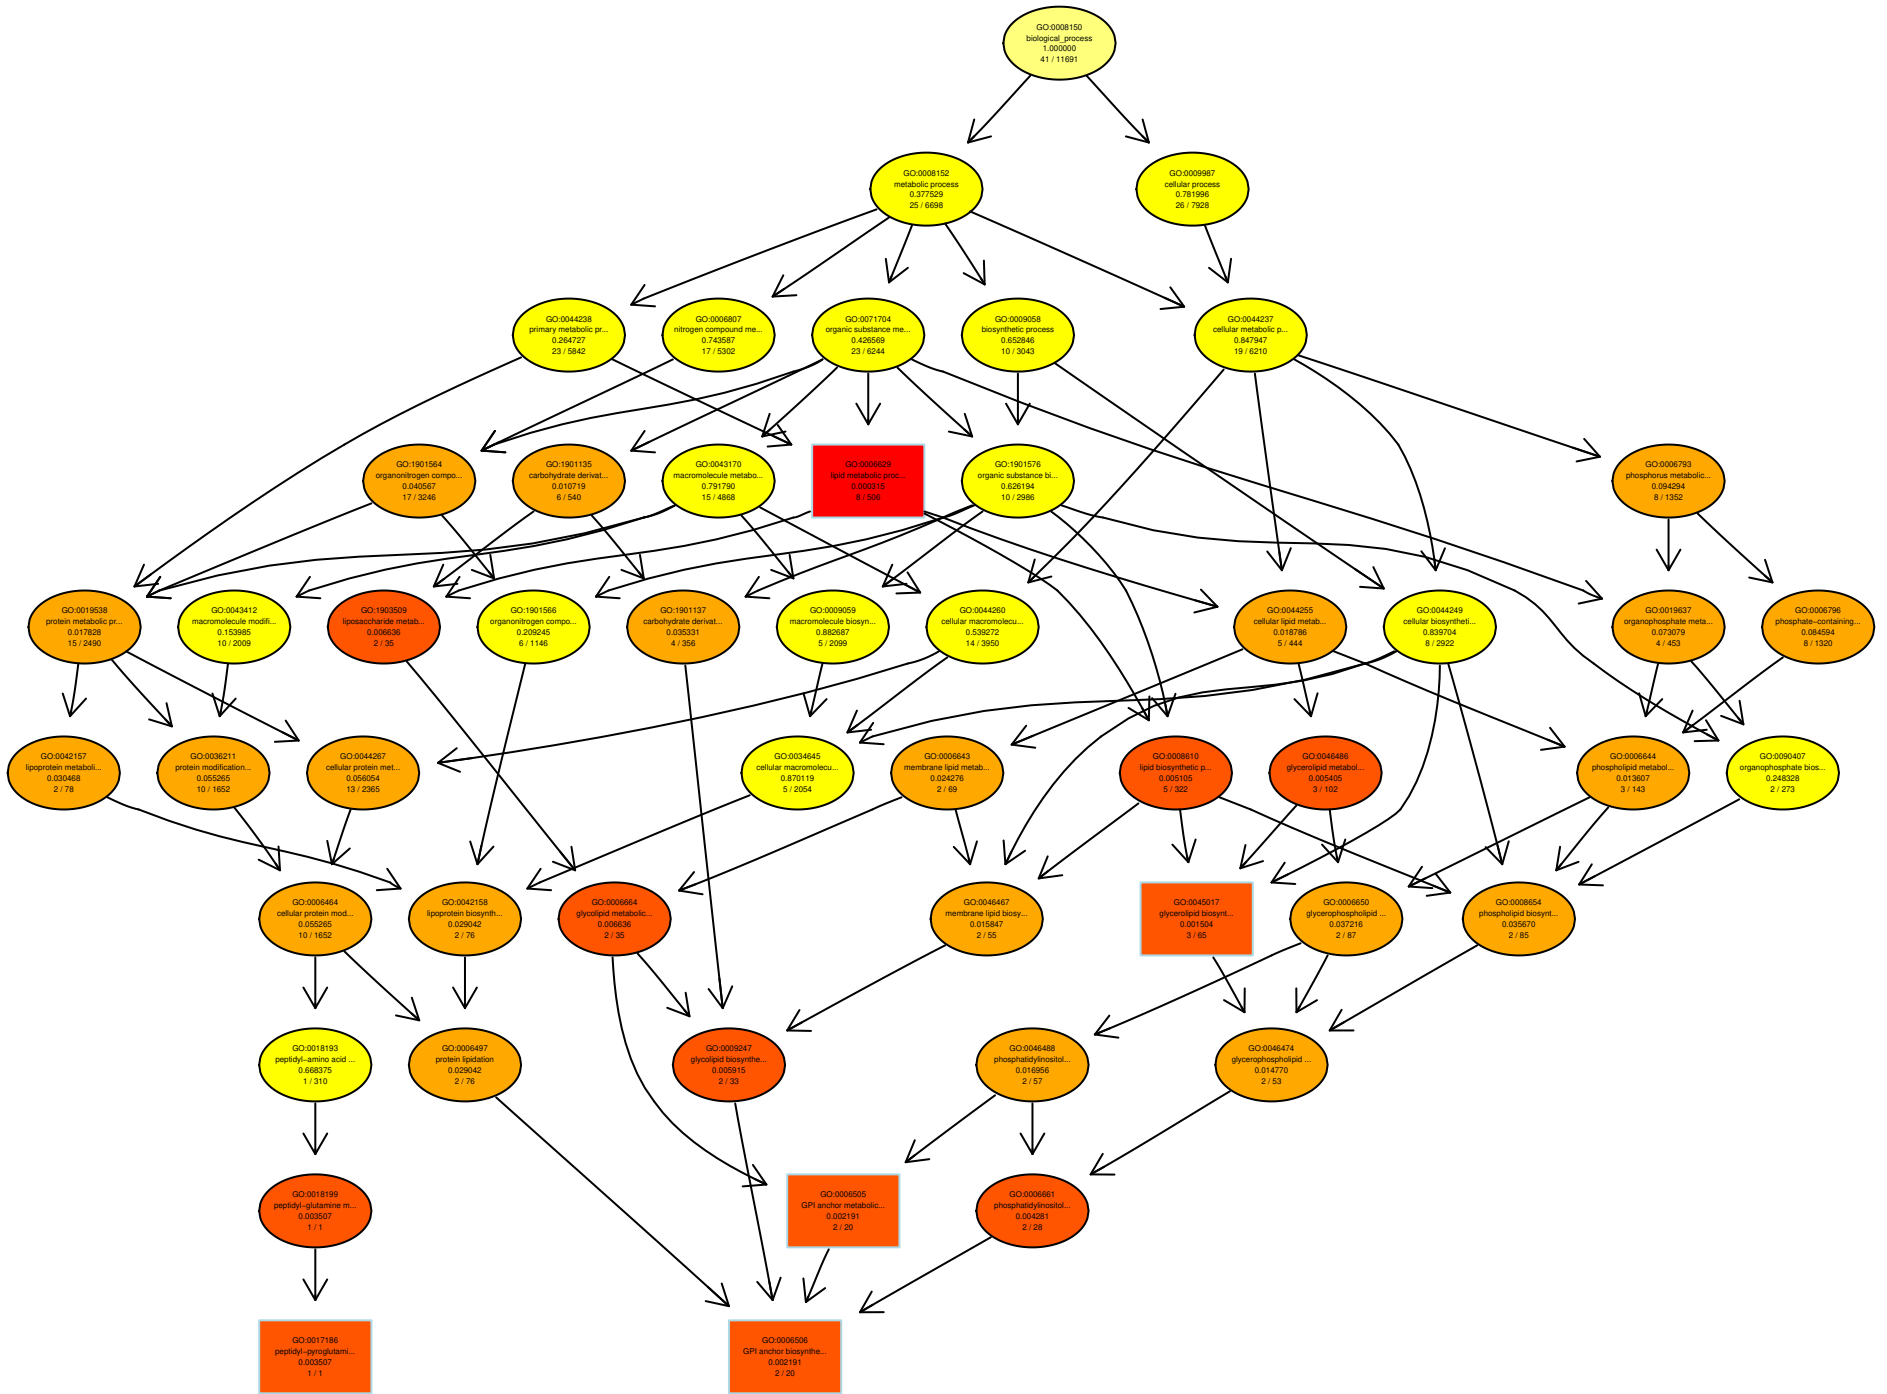

Supplement: PLD3-6-e396-s032.pdf [file PLD3-6-e396-s032.pdf]

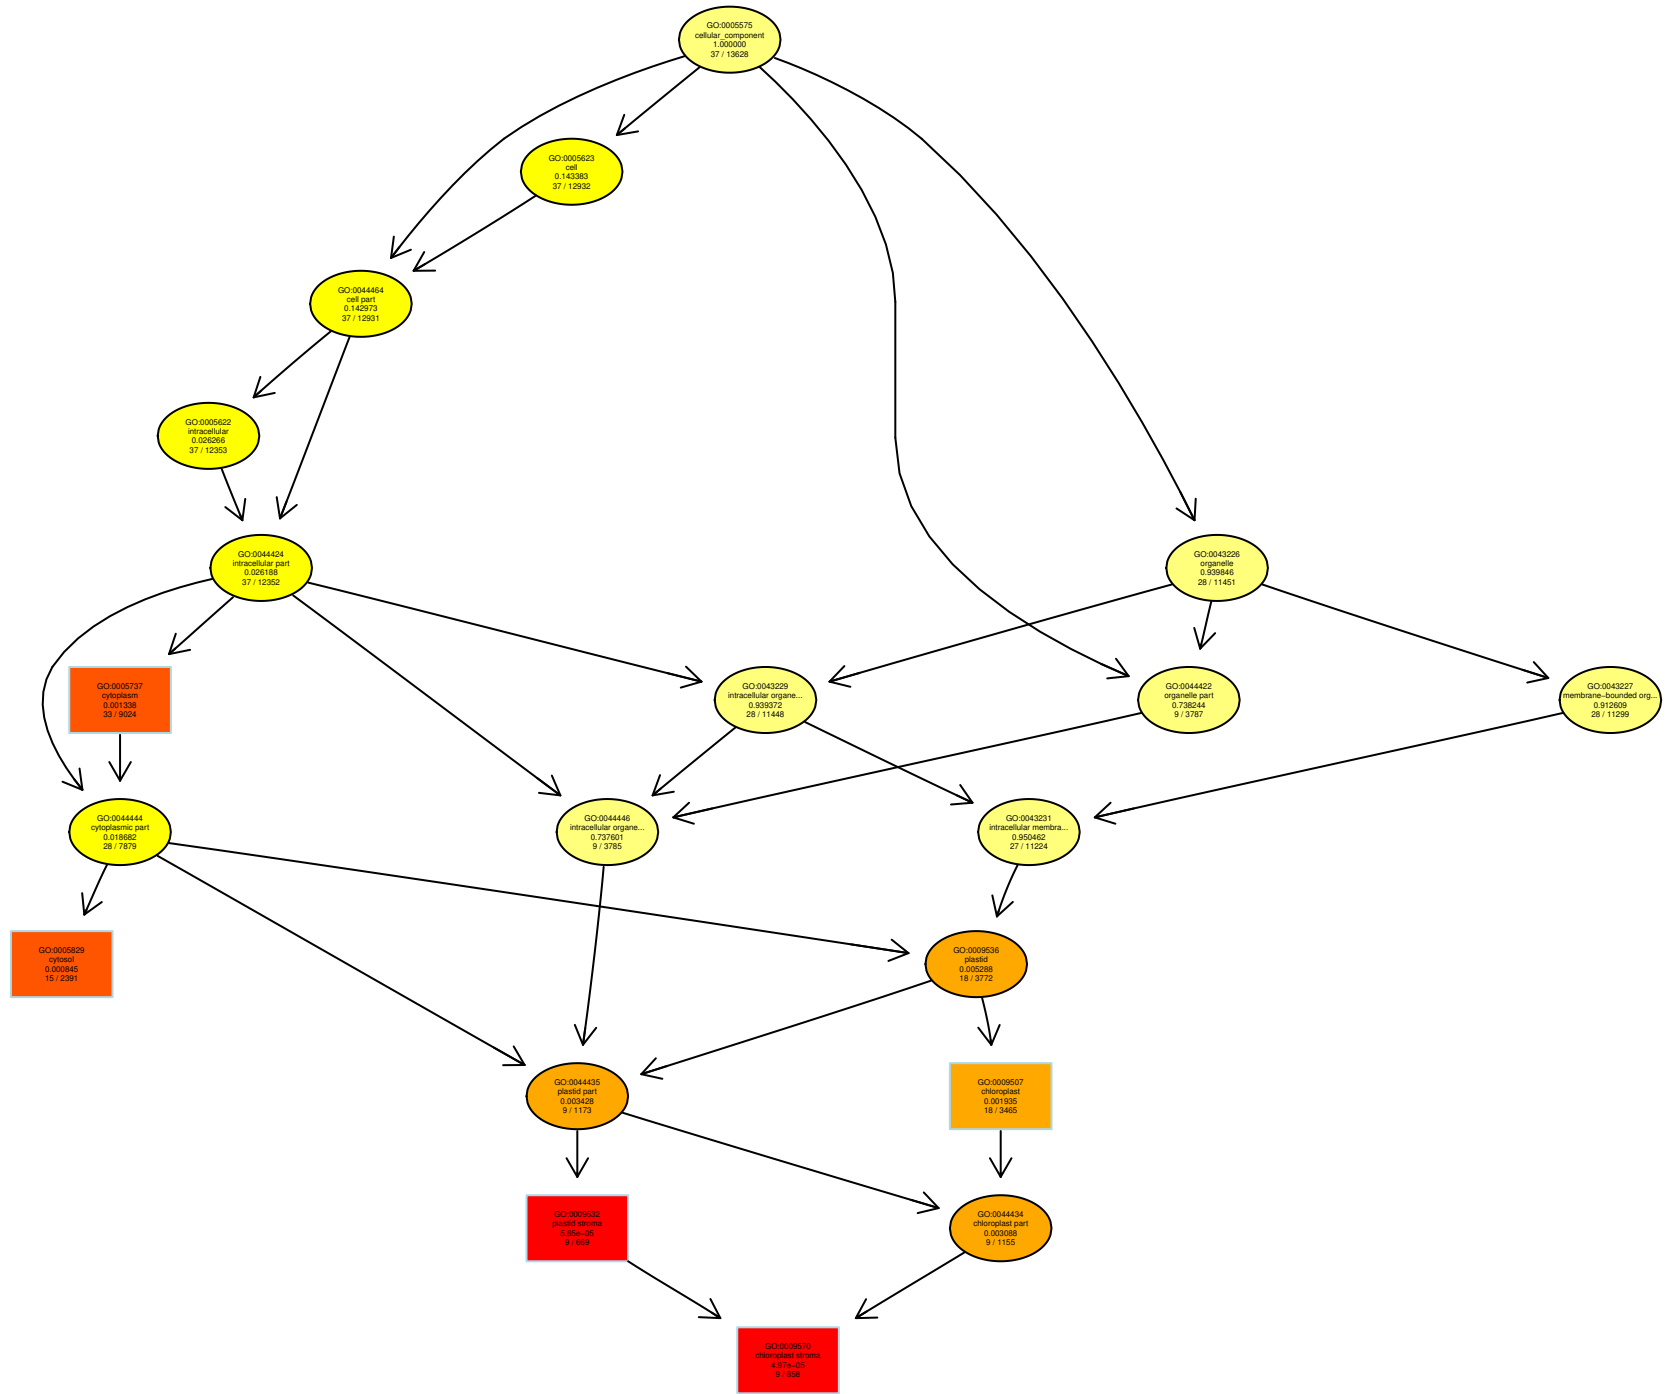

Supplement: PLD3-6-e396-s033.pdf [file PLD3-6-e396-s033.pdf]

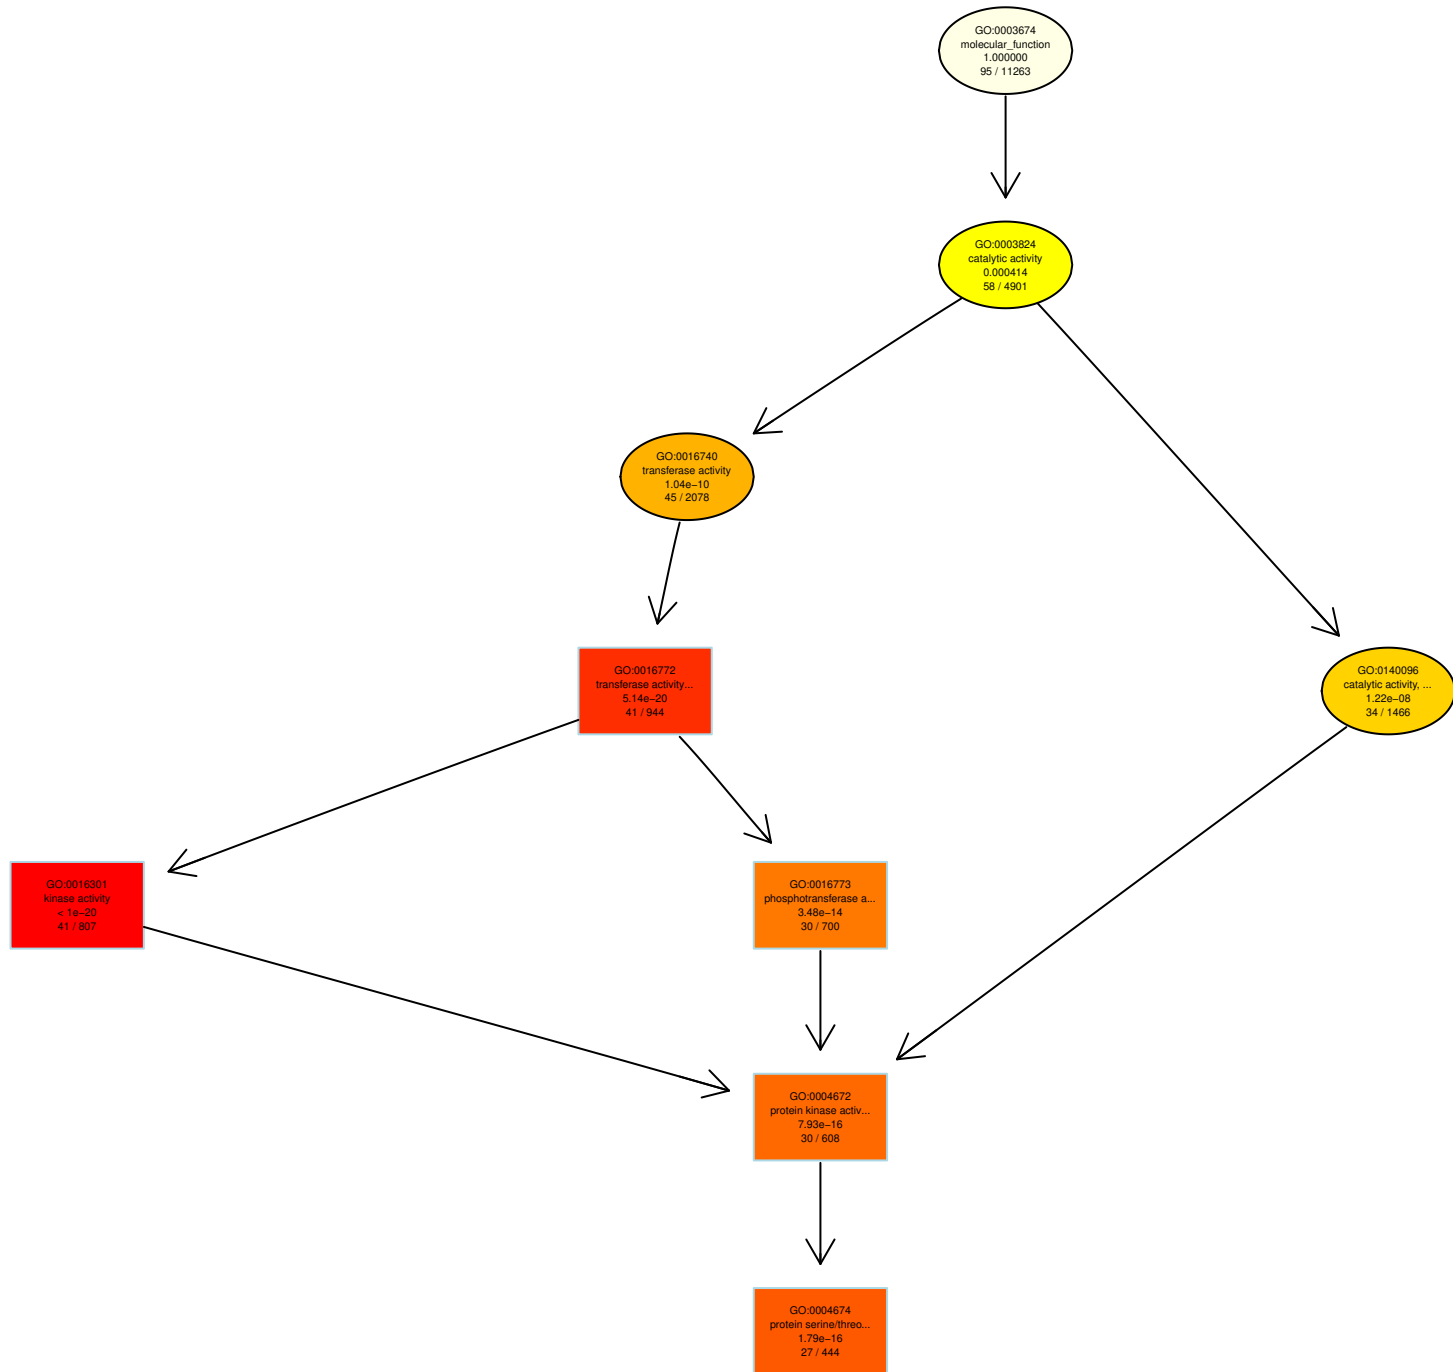

Supplement: PLD3-6-e396-s034.pdf [file PLD3-6-e396-s034.pdf]

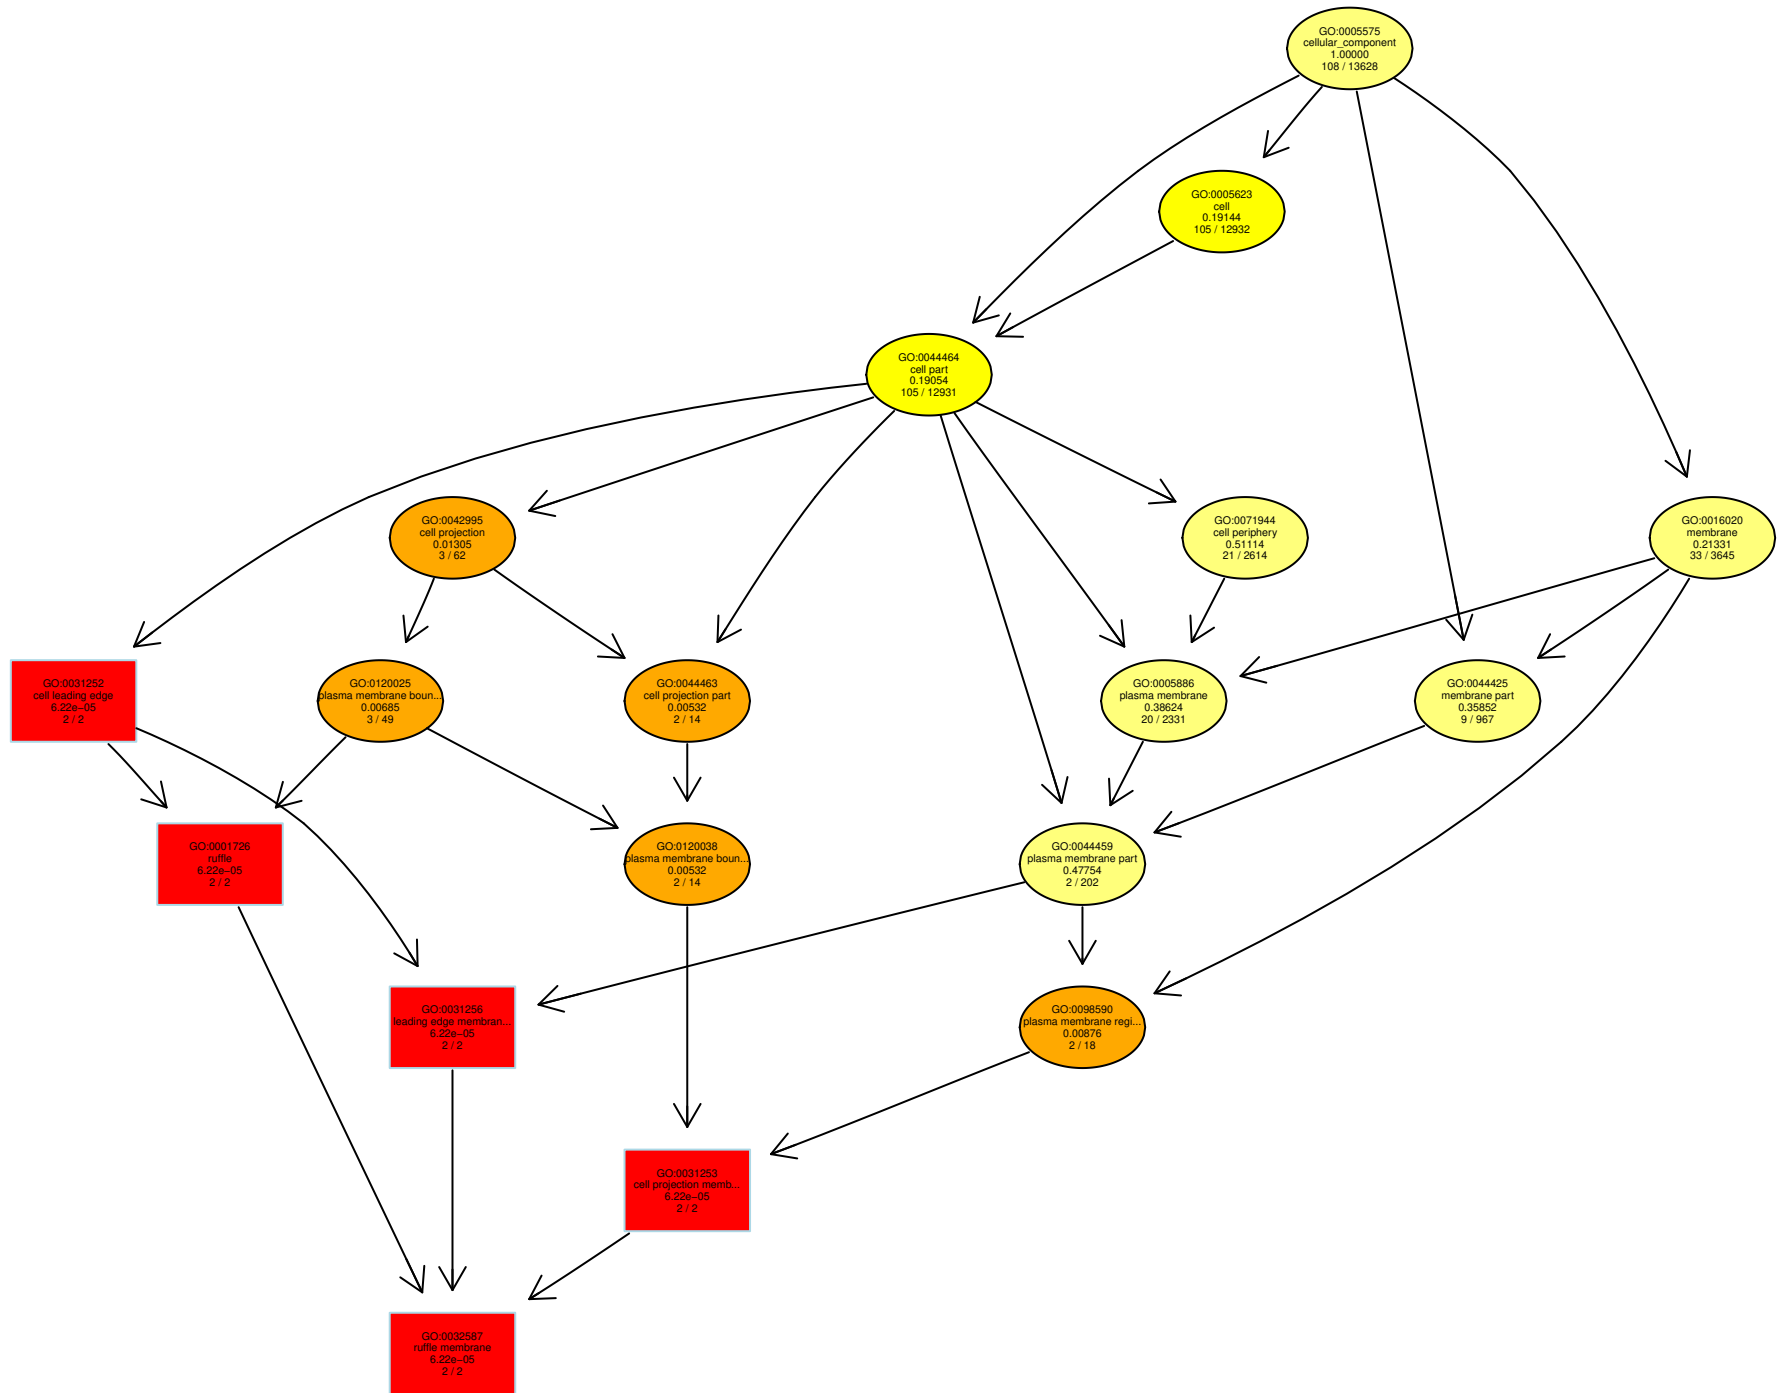

Supplement: PLD3-6-e396-s036.pdf [file PLD3-6-e396-s036.pdf]

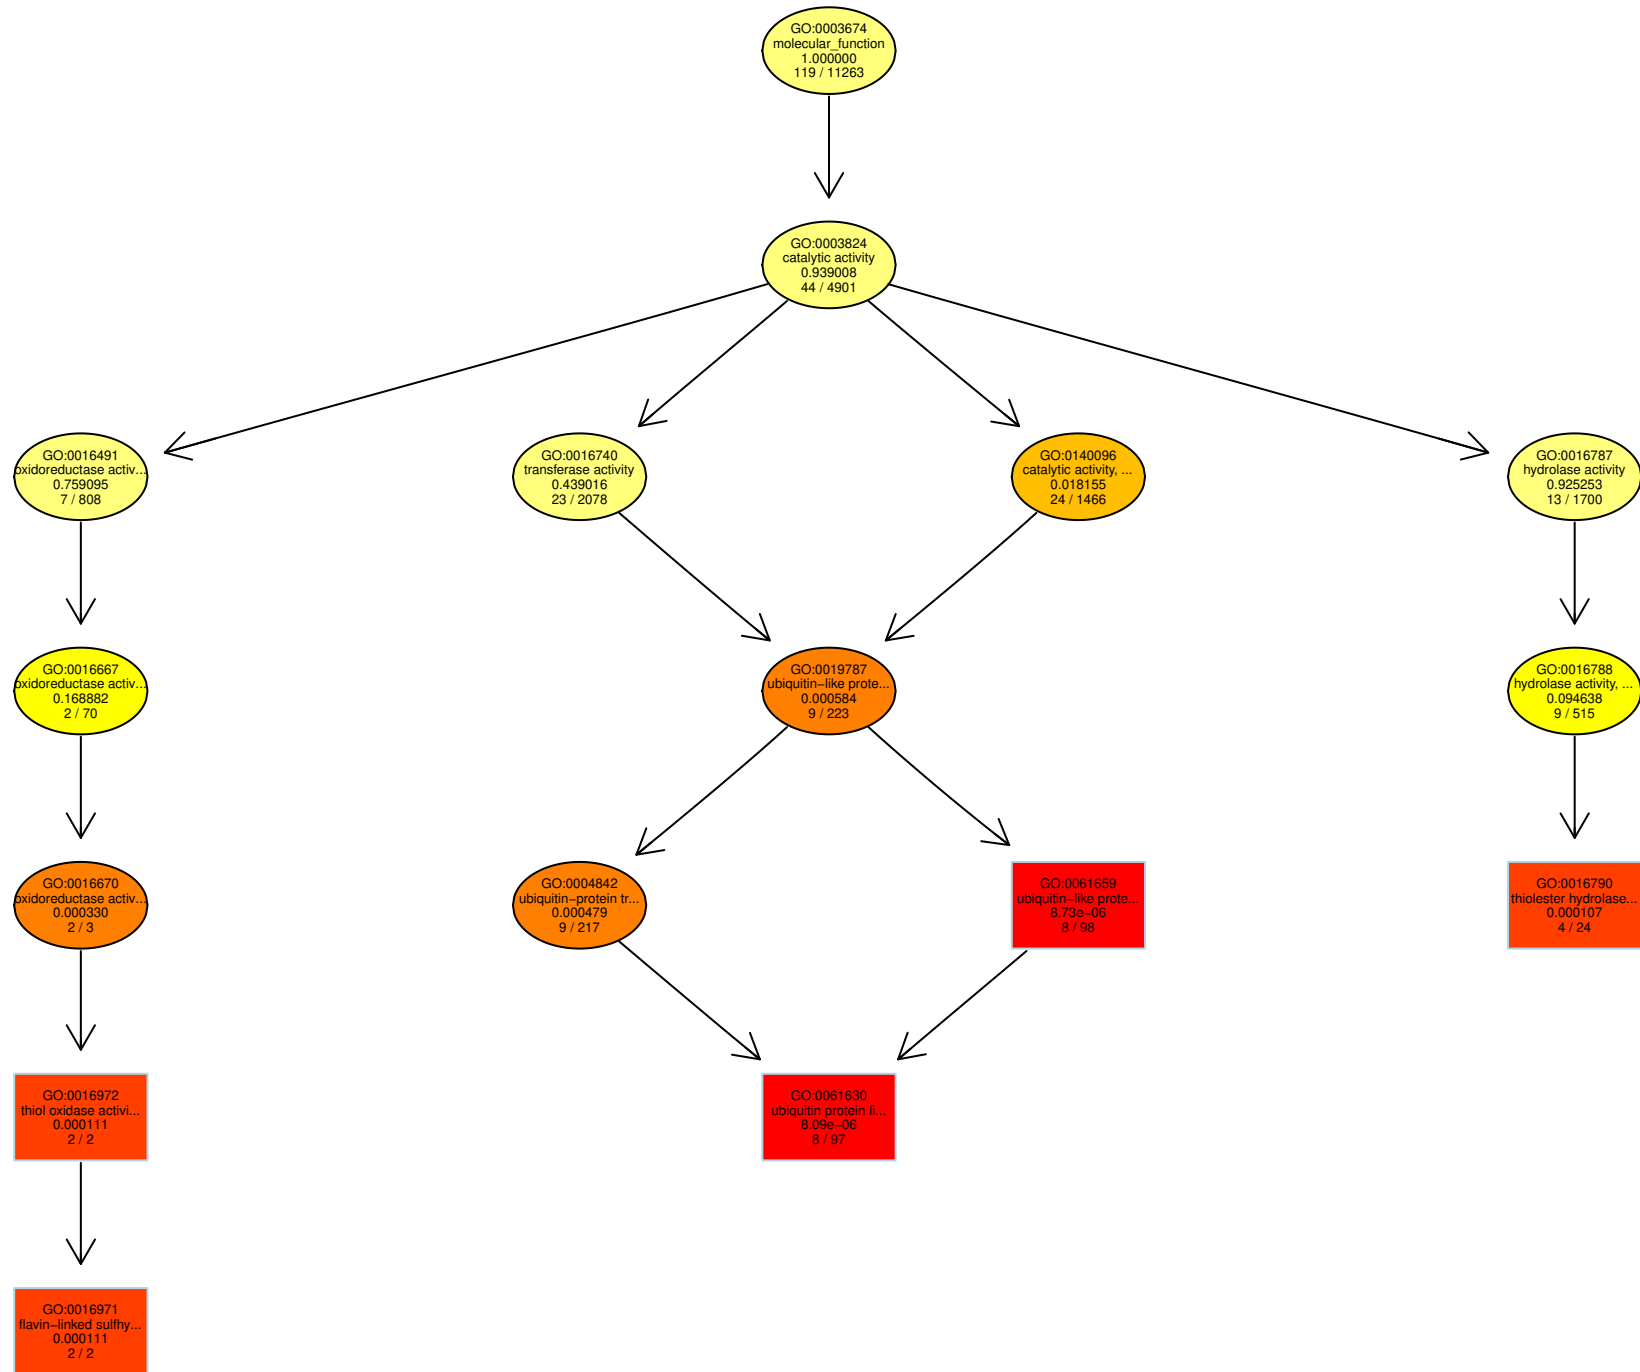

Supplement: PLD3-6-e396-s040.pdf [file PLD3-6-e396-s040.pdf]

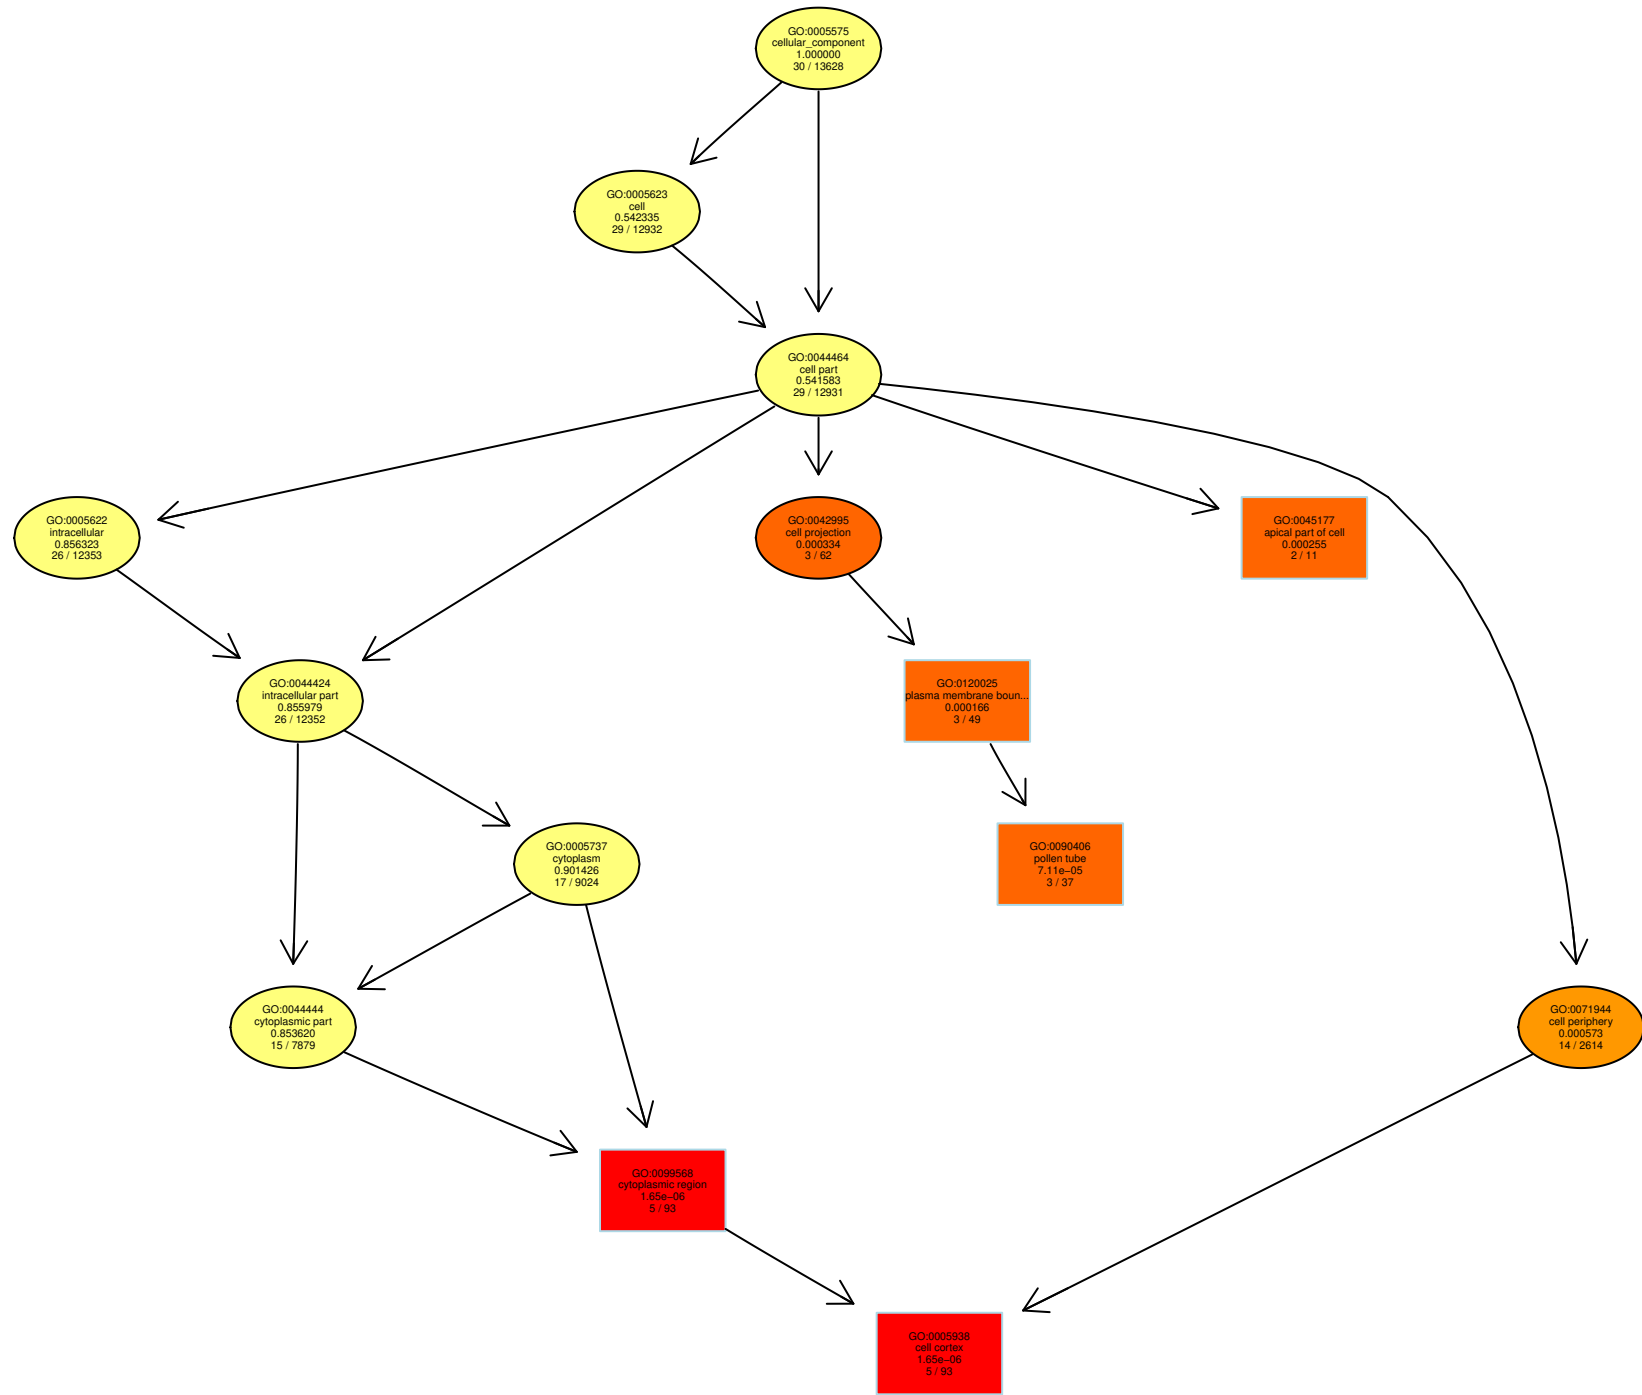

Supplement: PLD3-6-e396-s041.pdf [file PLD3-6-e396-s041.pdf]

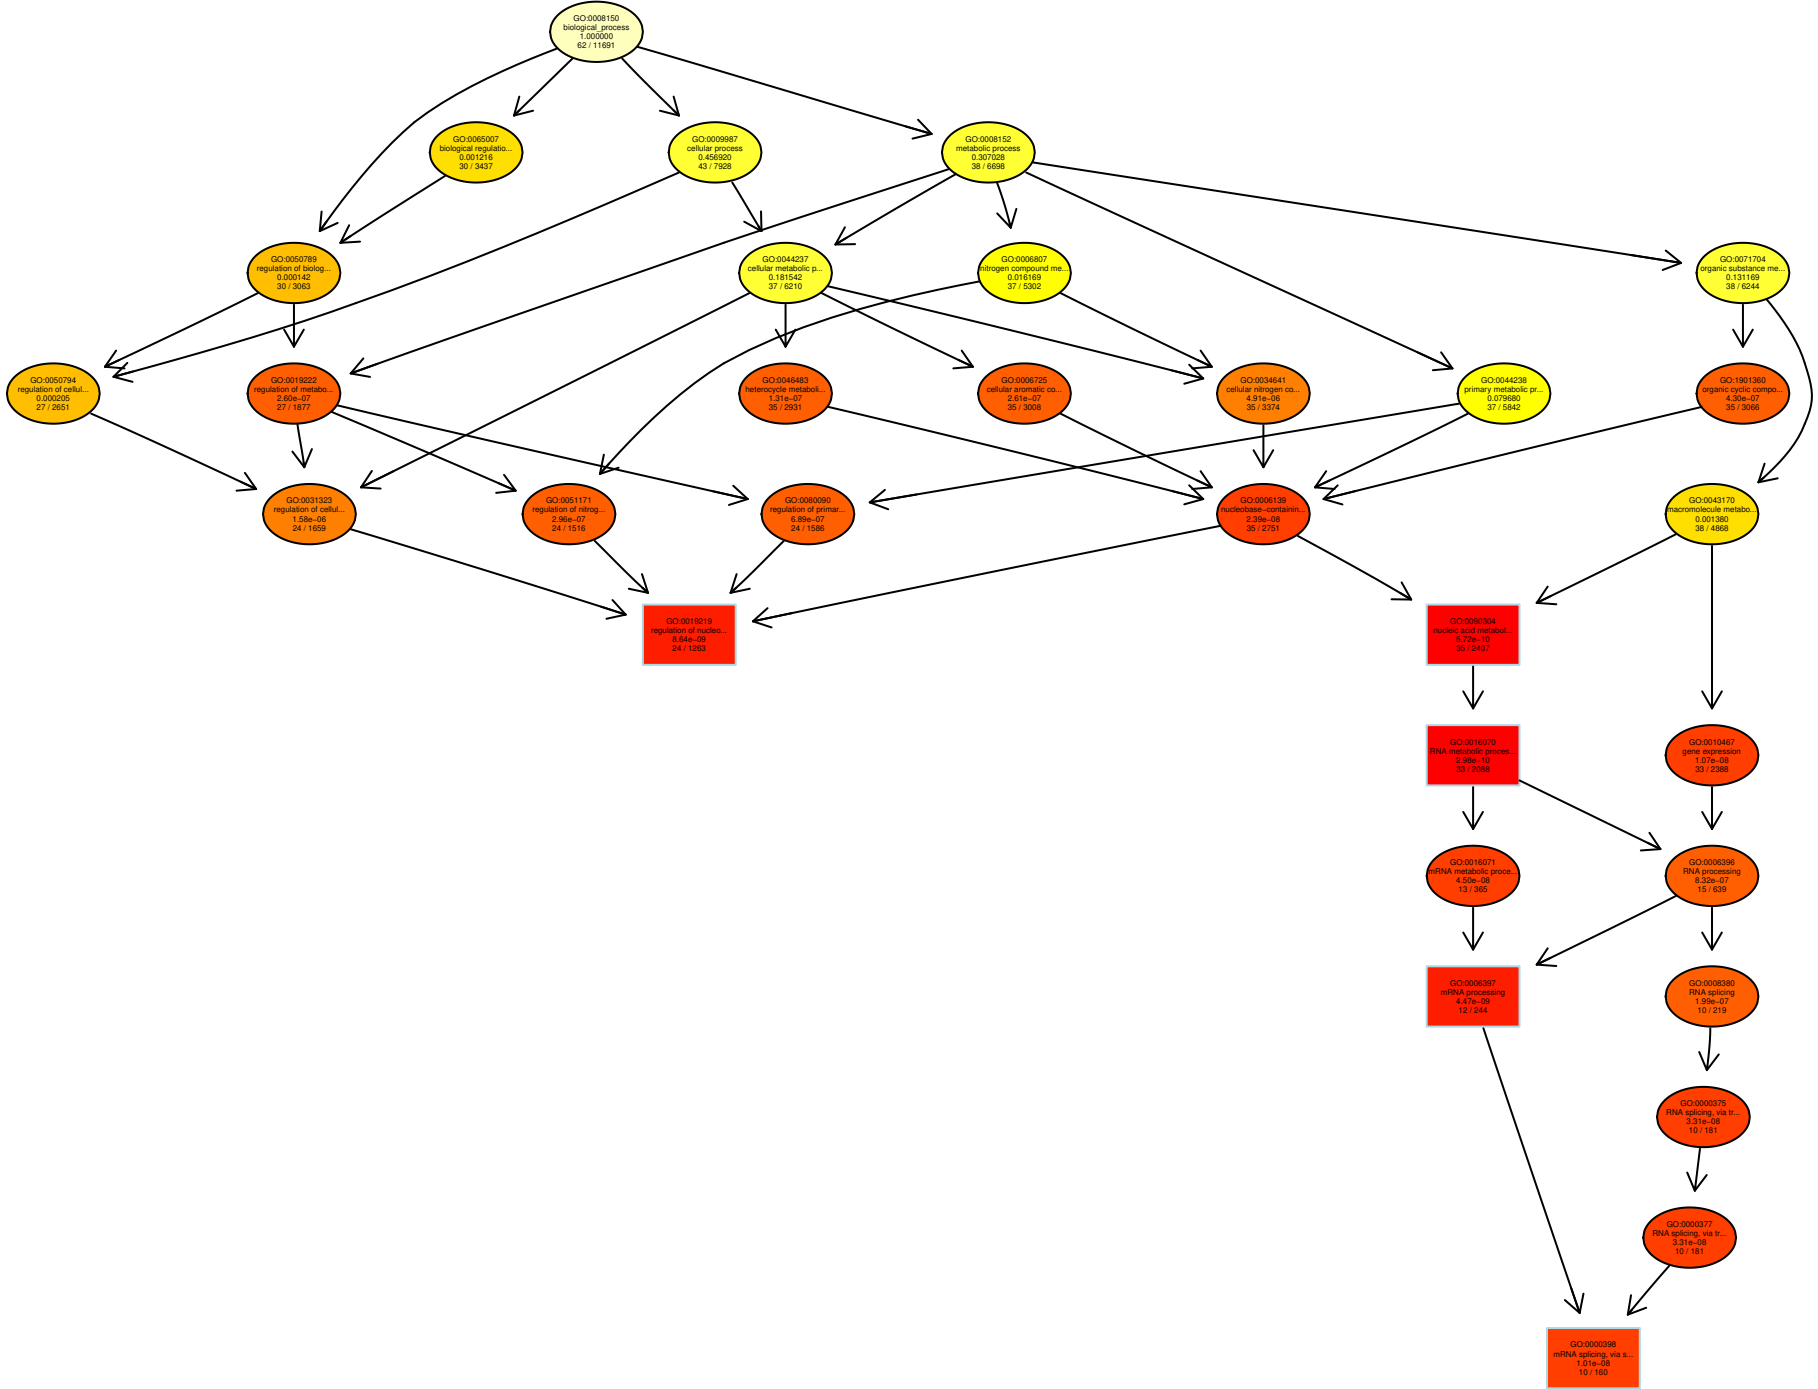

Supplement: PLD3-6-e396-s042.pdf [file PLD3-6-e396-s042.pdf]

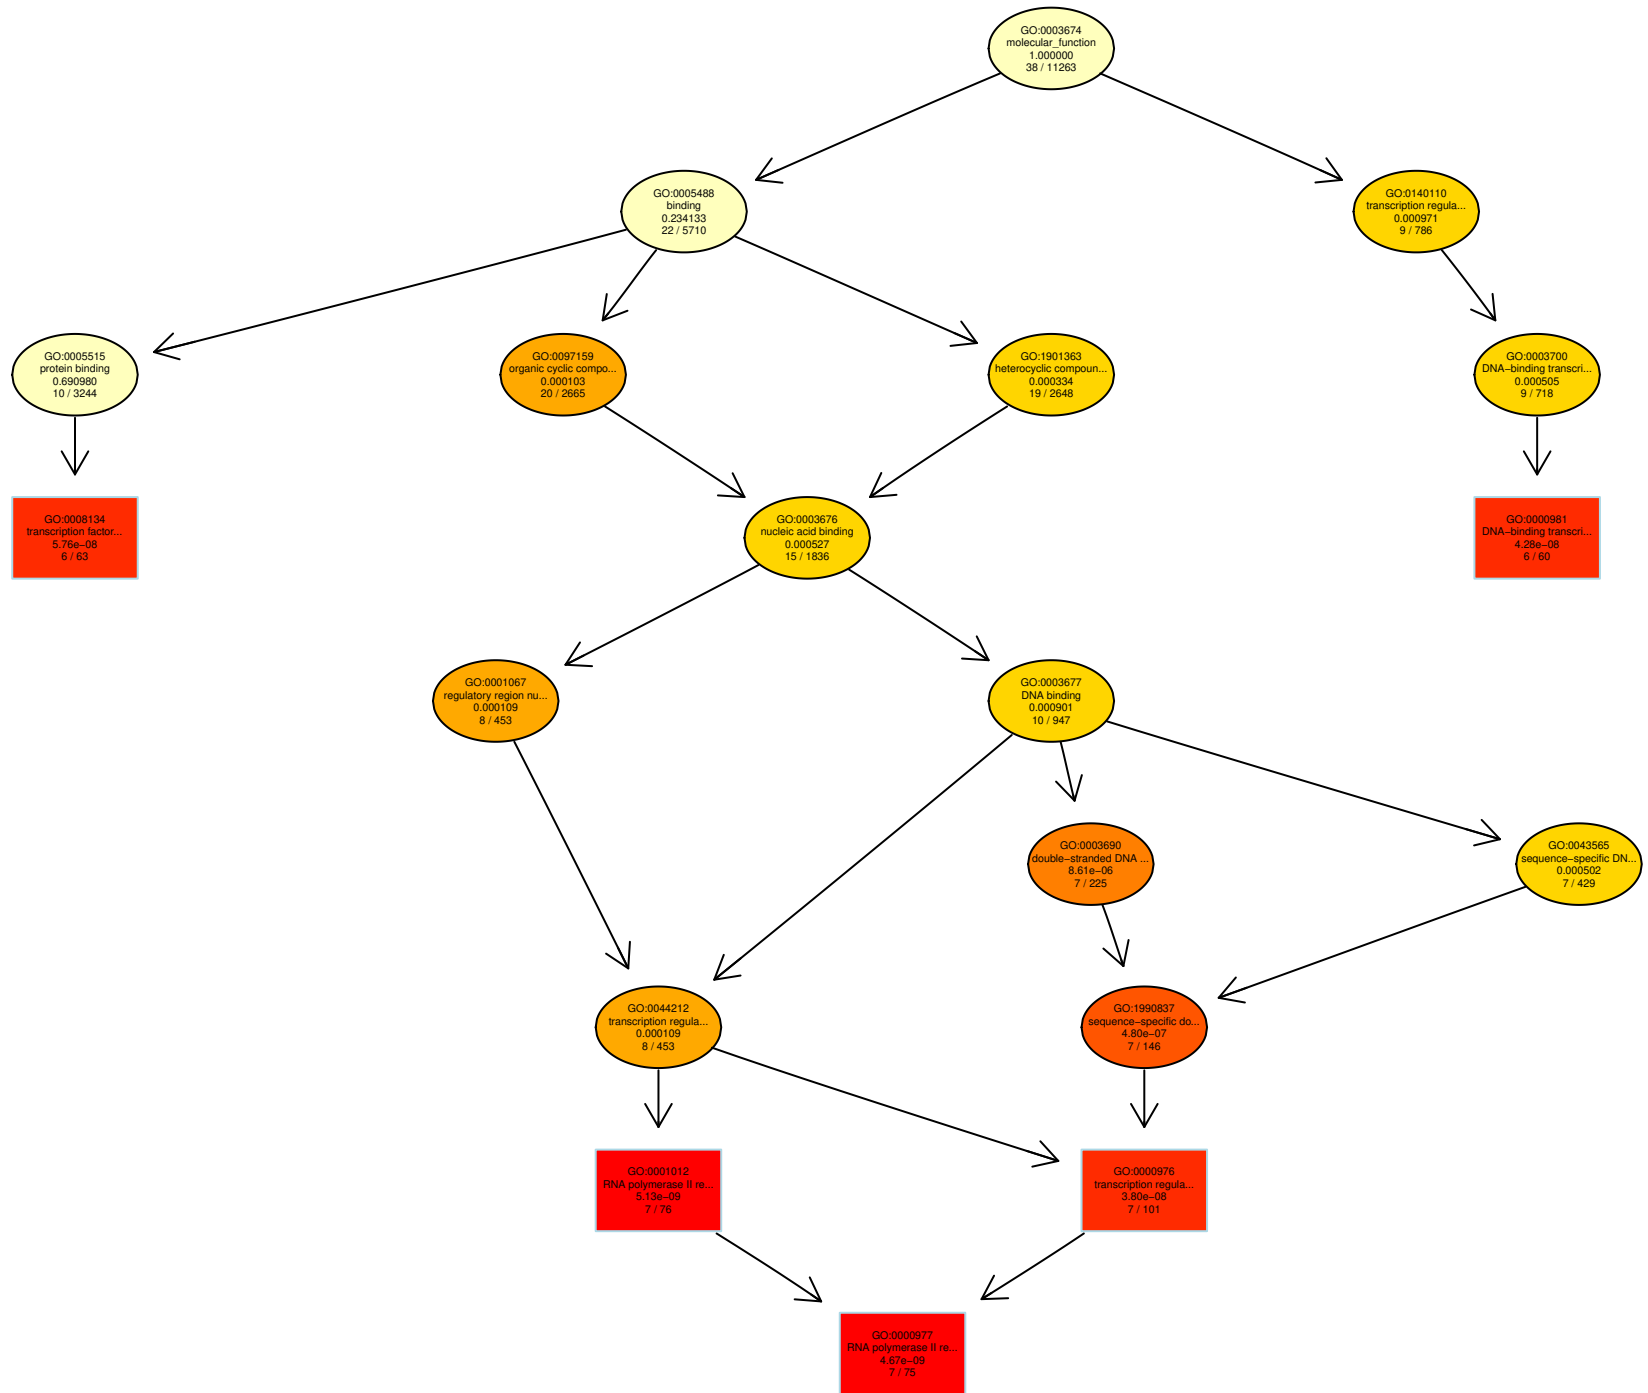

Supplement: PLD3-6-e396-s043.pdf [file PLD3-6-e396-s043.pdf]

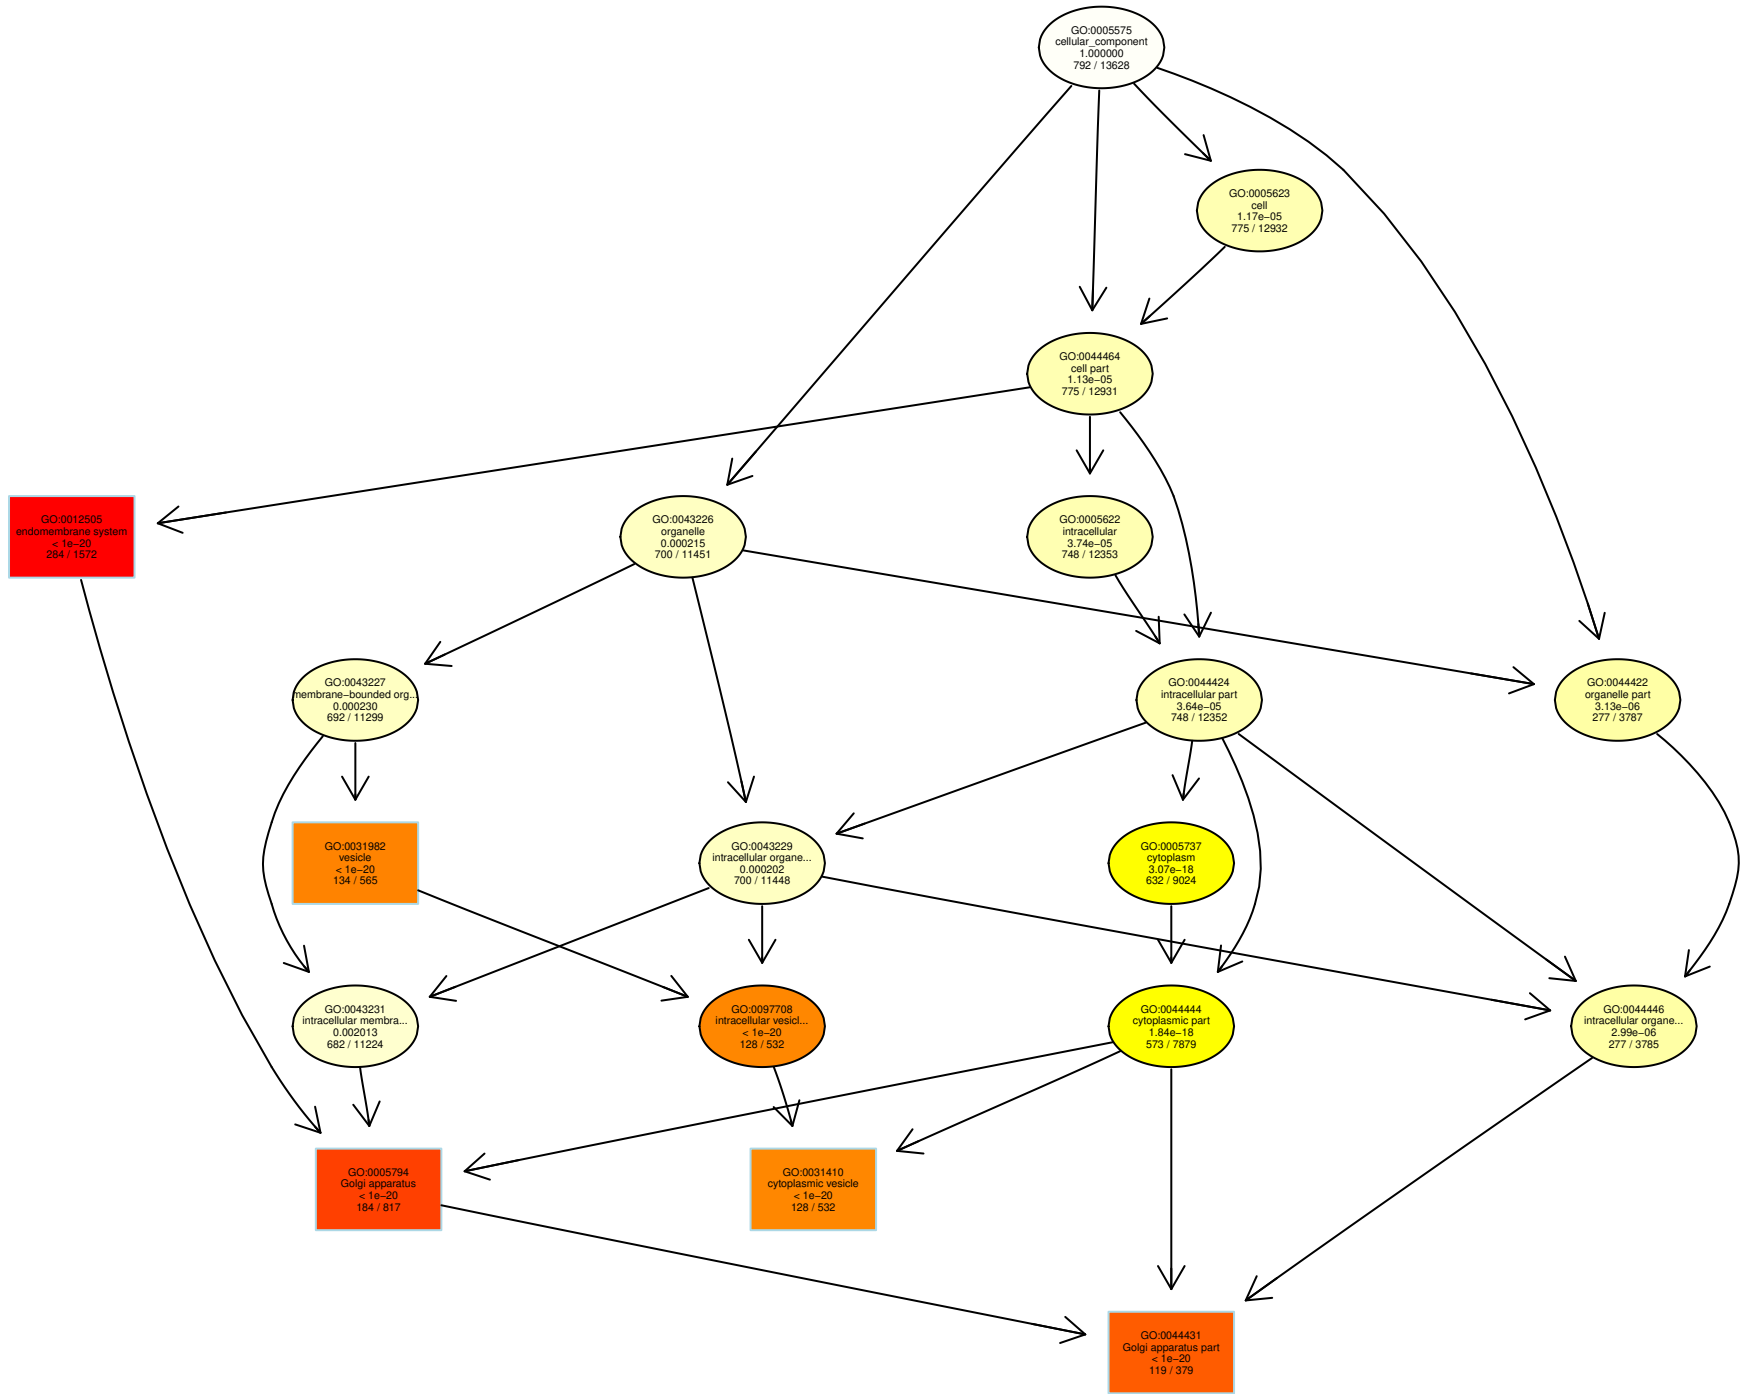

Supplement: PLD3-6-e396-s044.pdf [file PLD3-6-e396-s044.pdf]

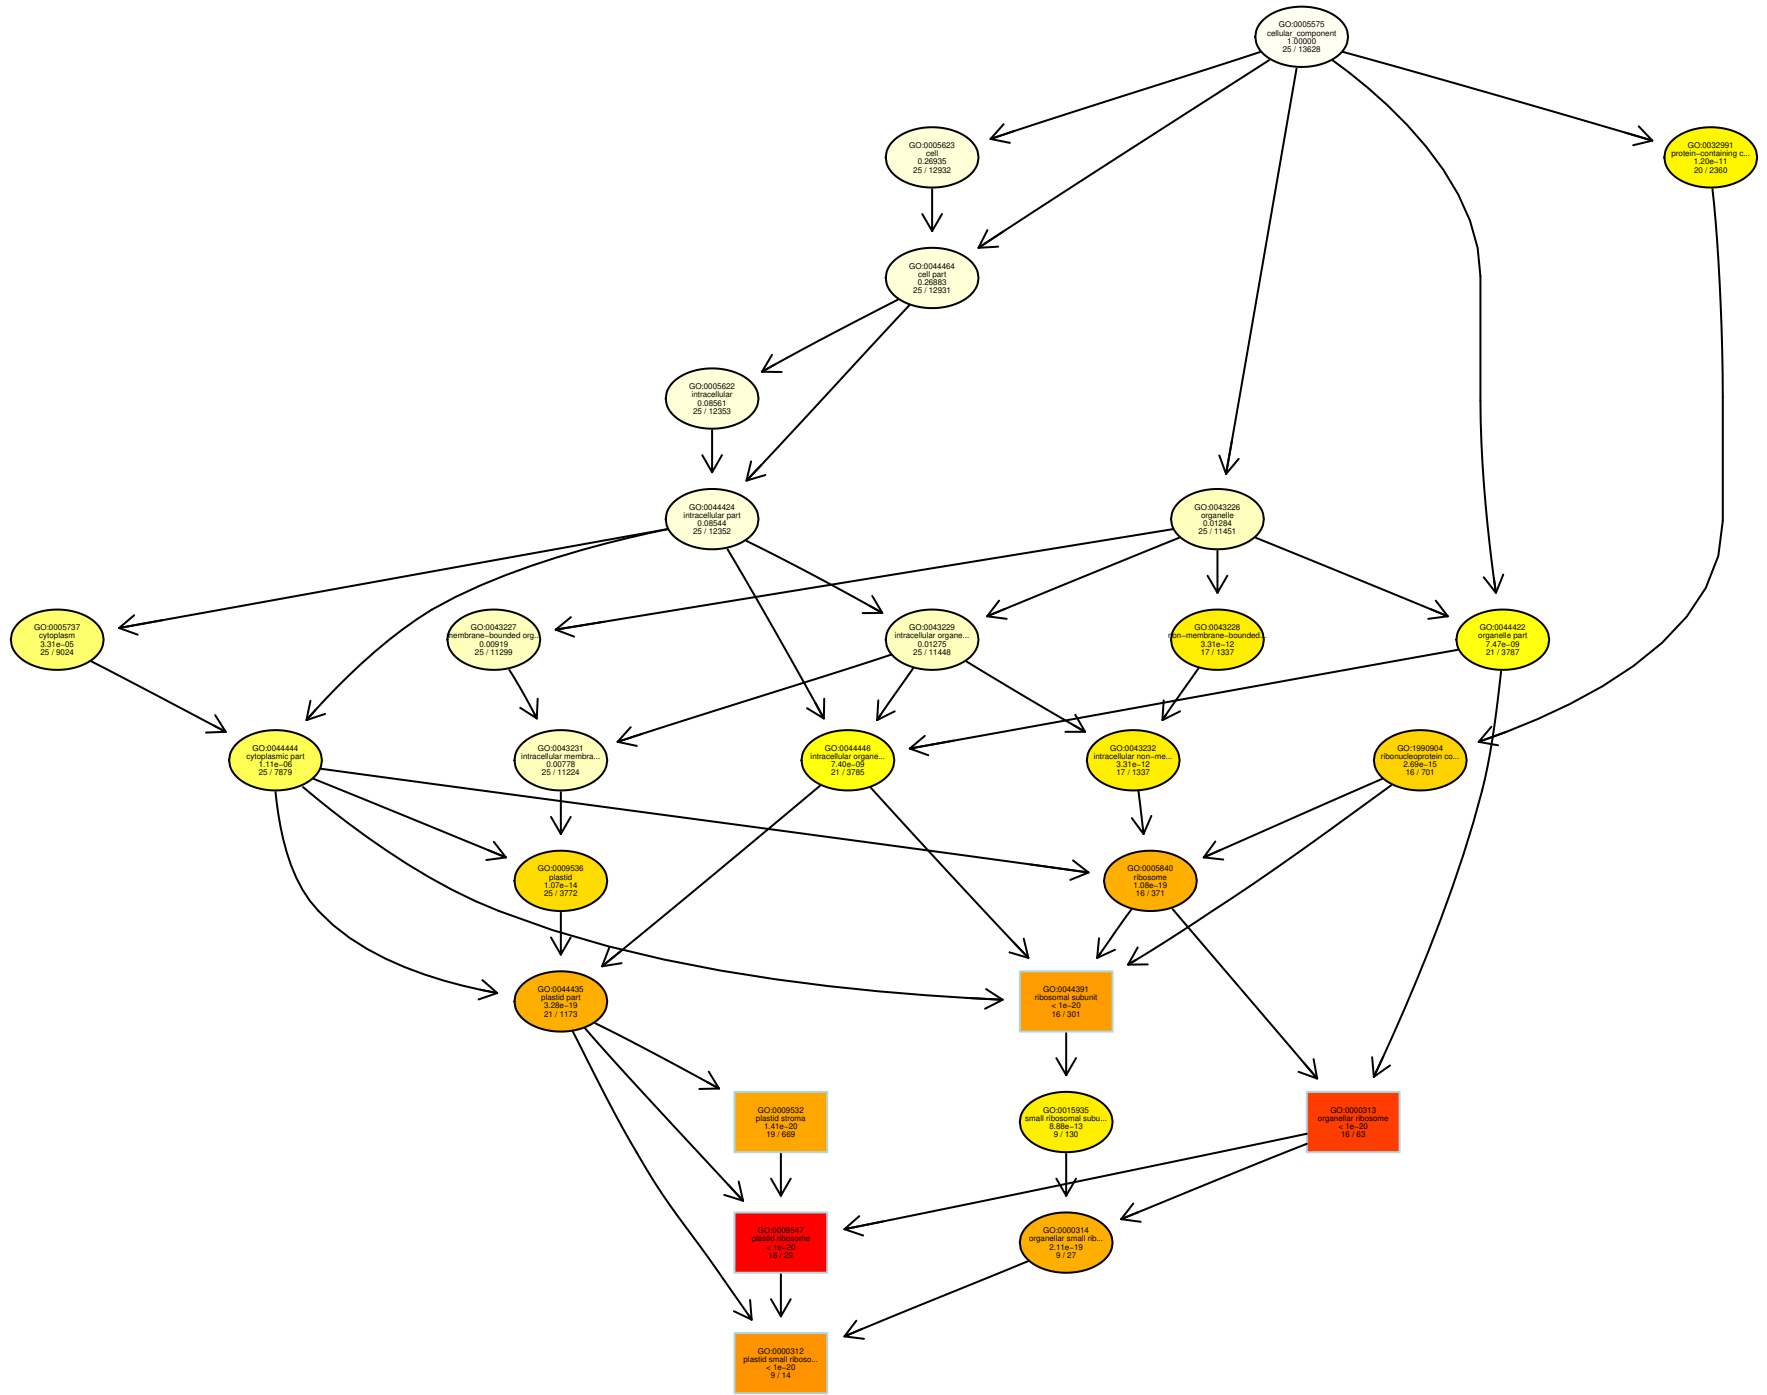

Supplement: PLD3-6-e396-s045.pdf [file PLD3-6-e396-s045.pdf]

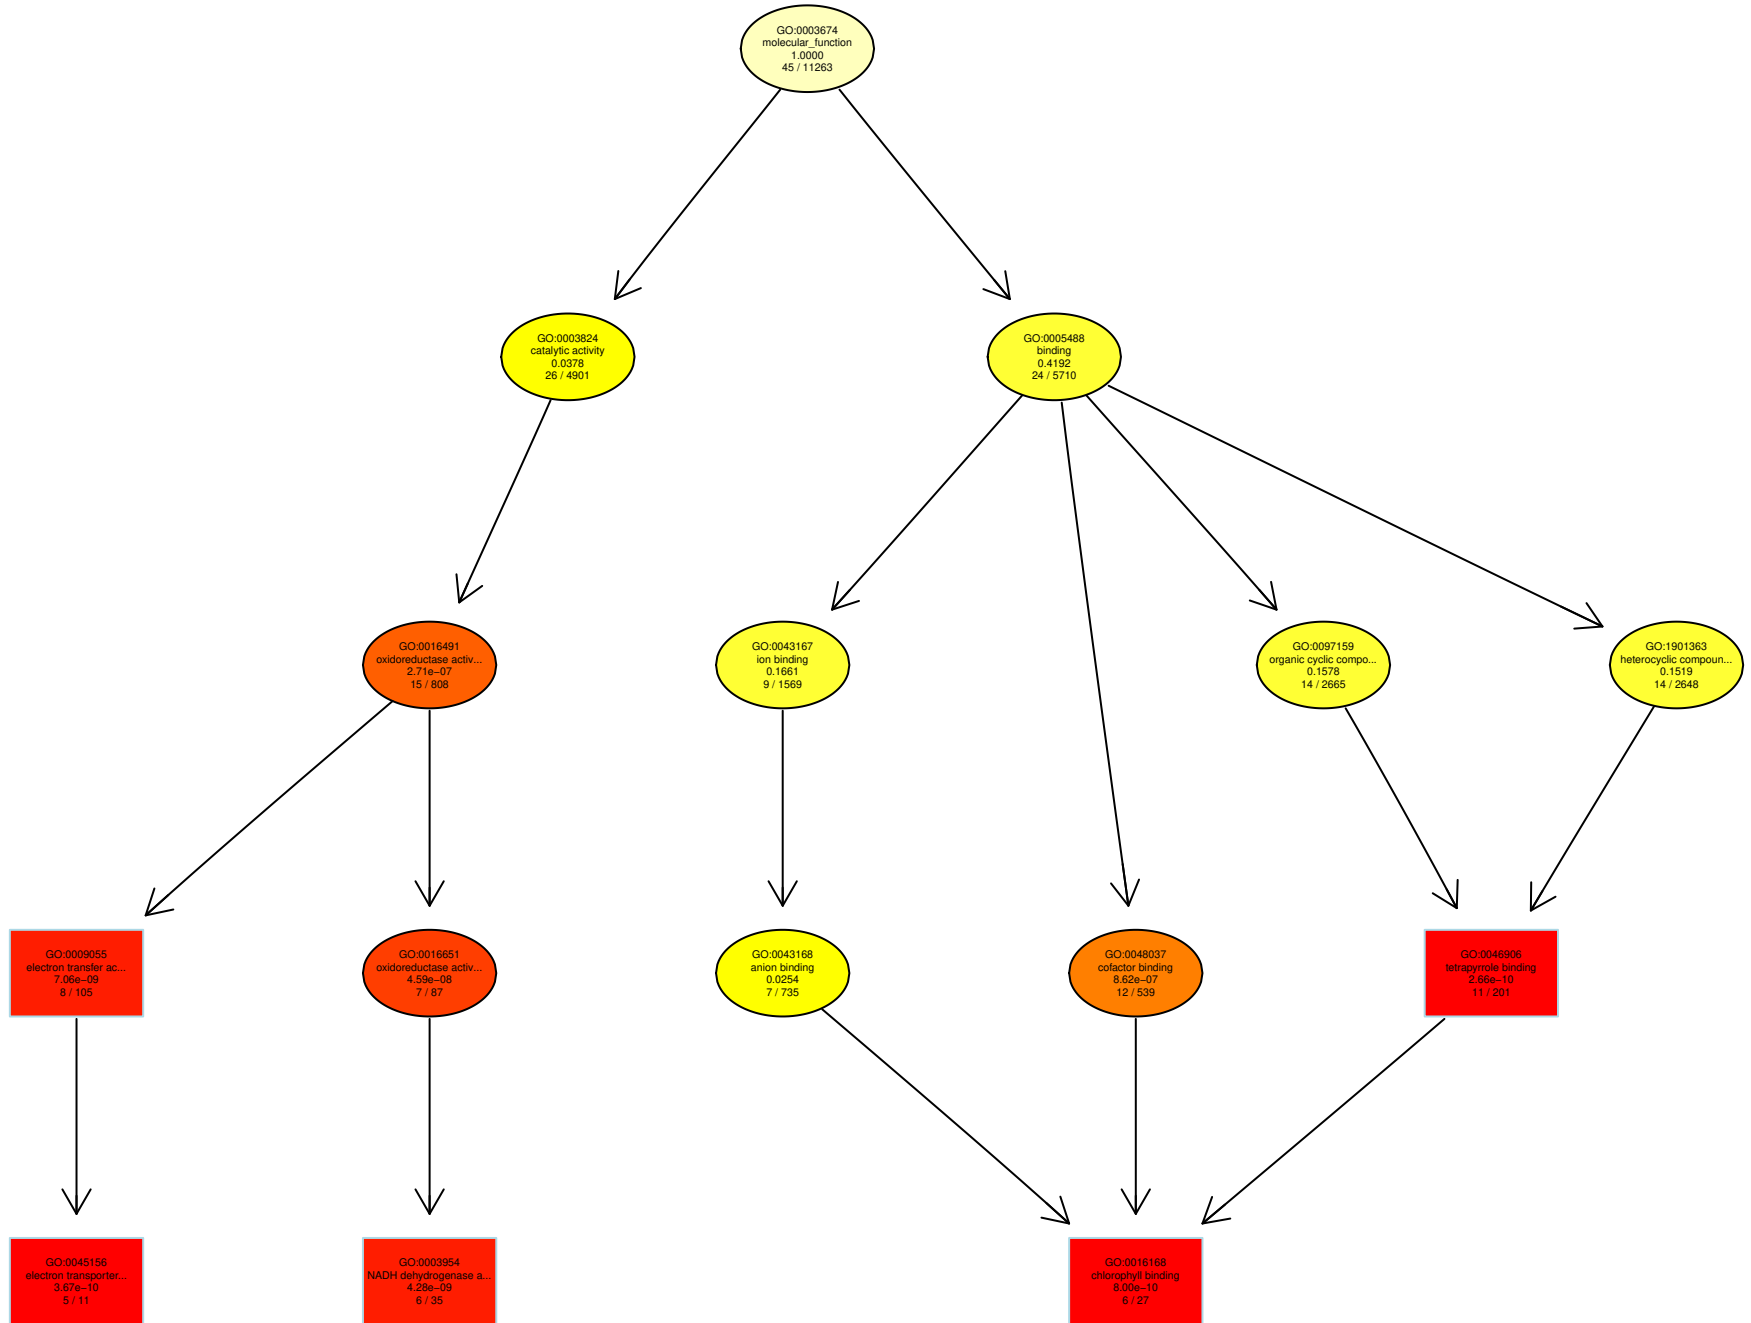

Supplement: PLD3-6-e396-s047.pdf [file PLD3-6-e396-s047.pdf]

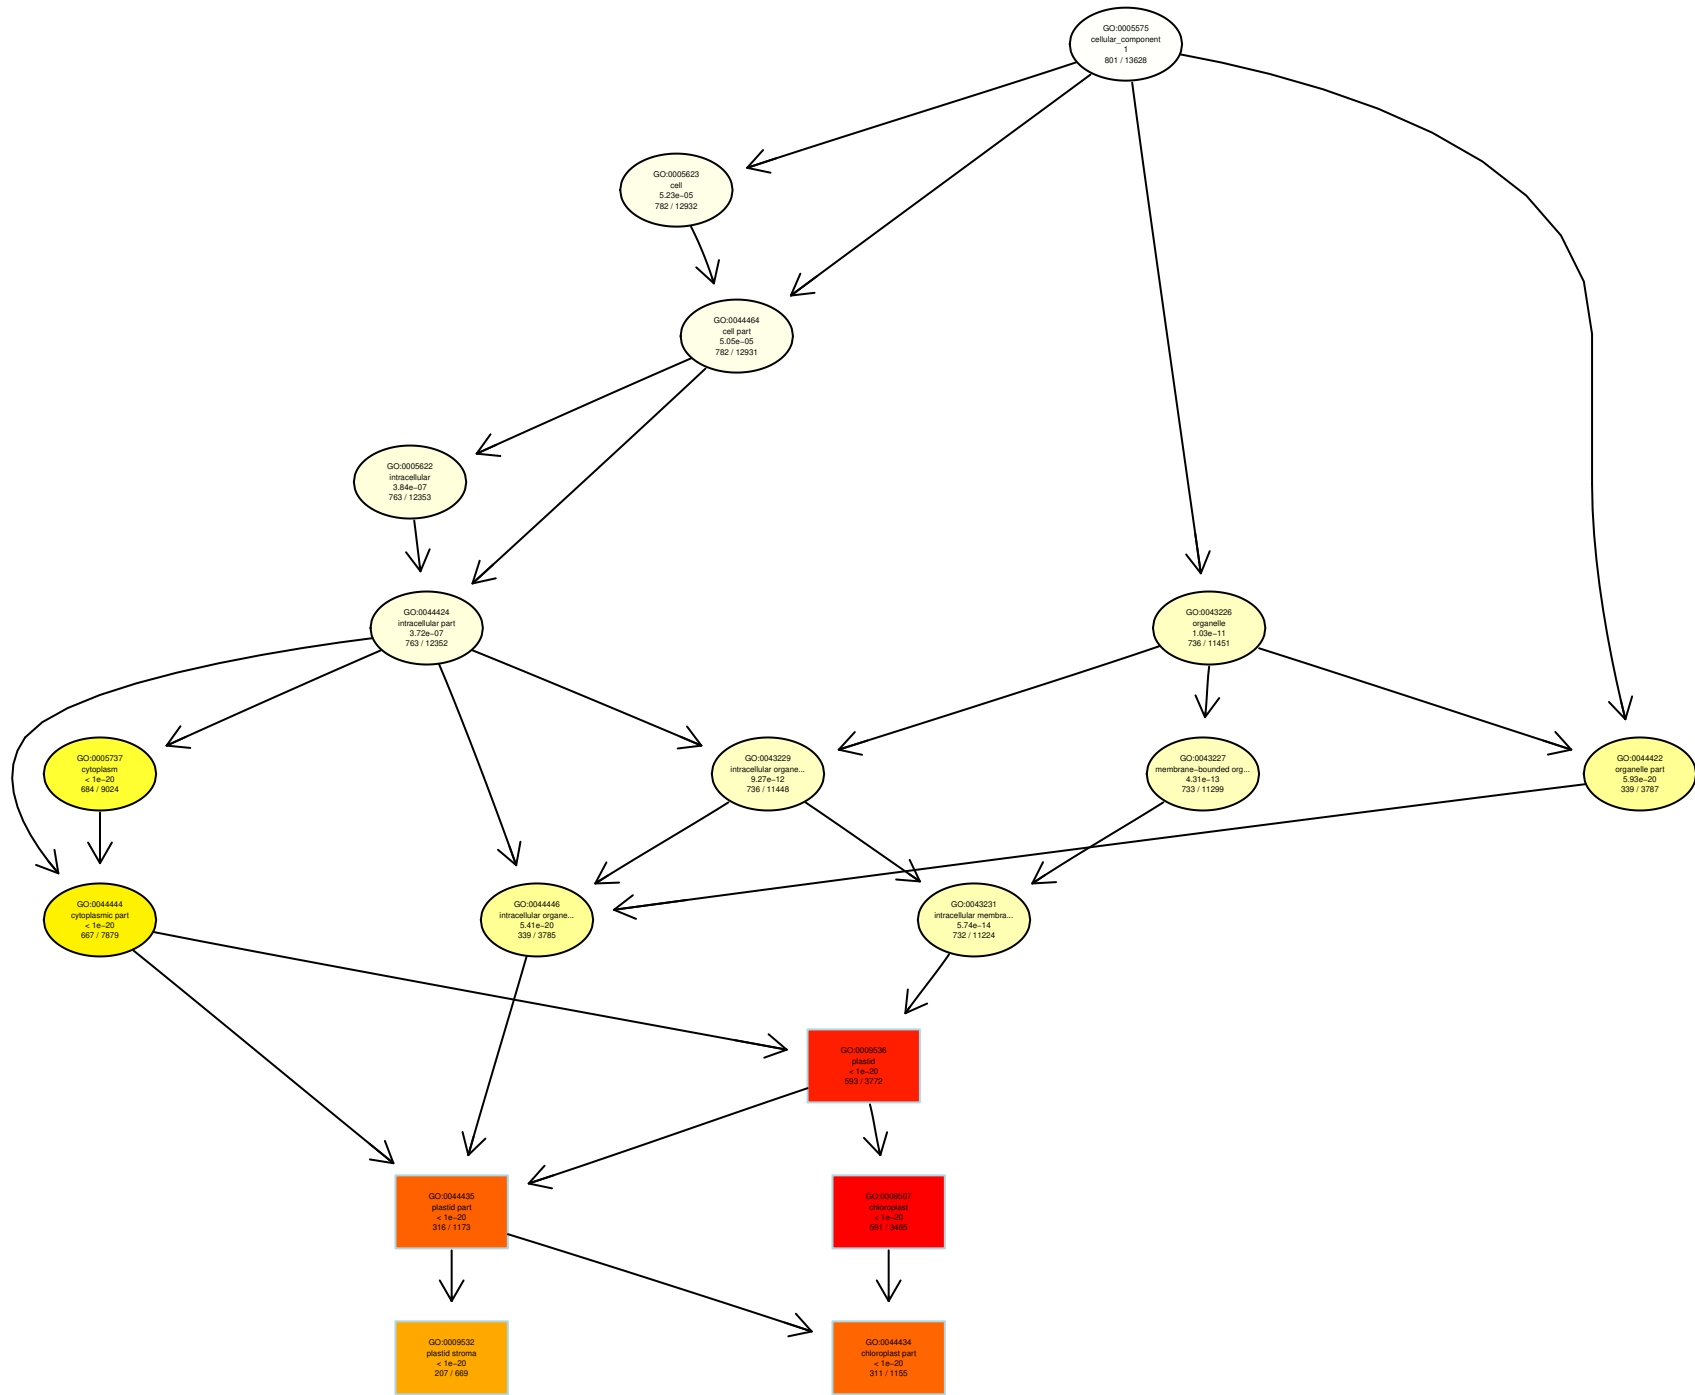

Supplement: PLD3-6-e396-s051.pdf [file PLD3-6-e396-s051.pdf]

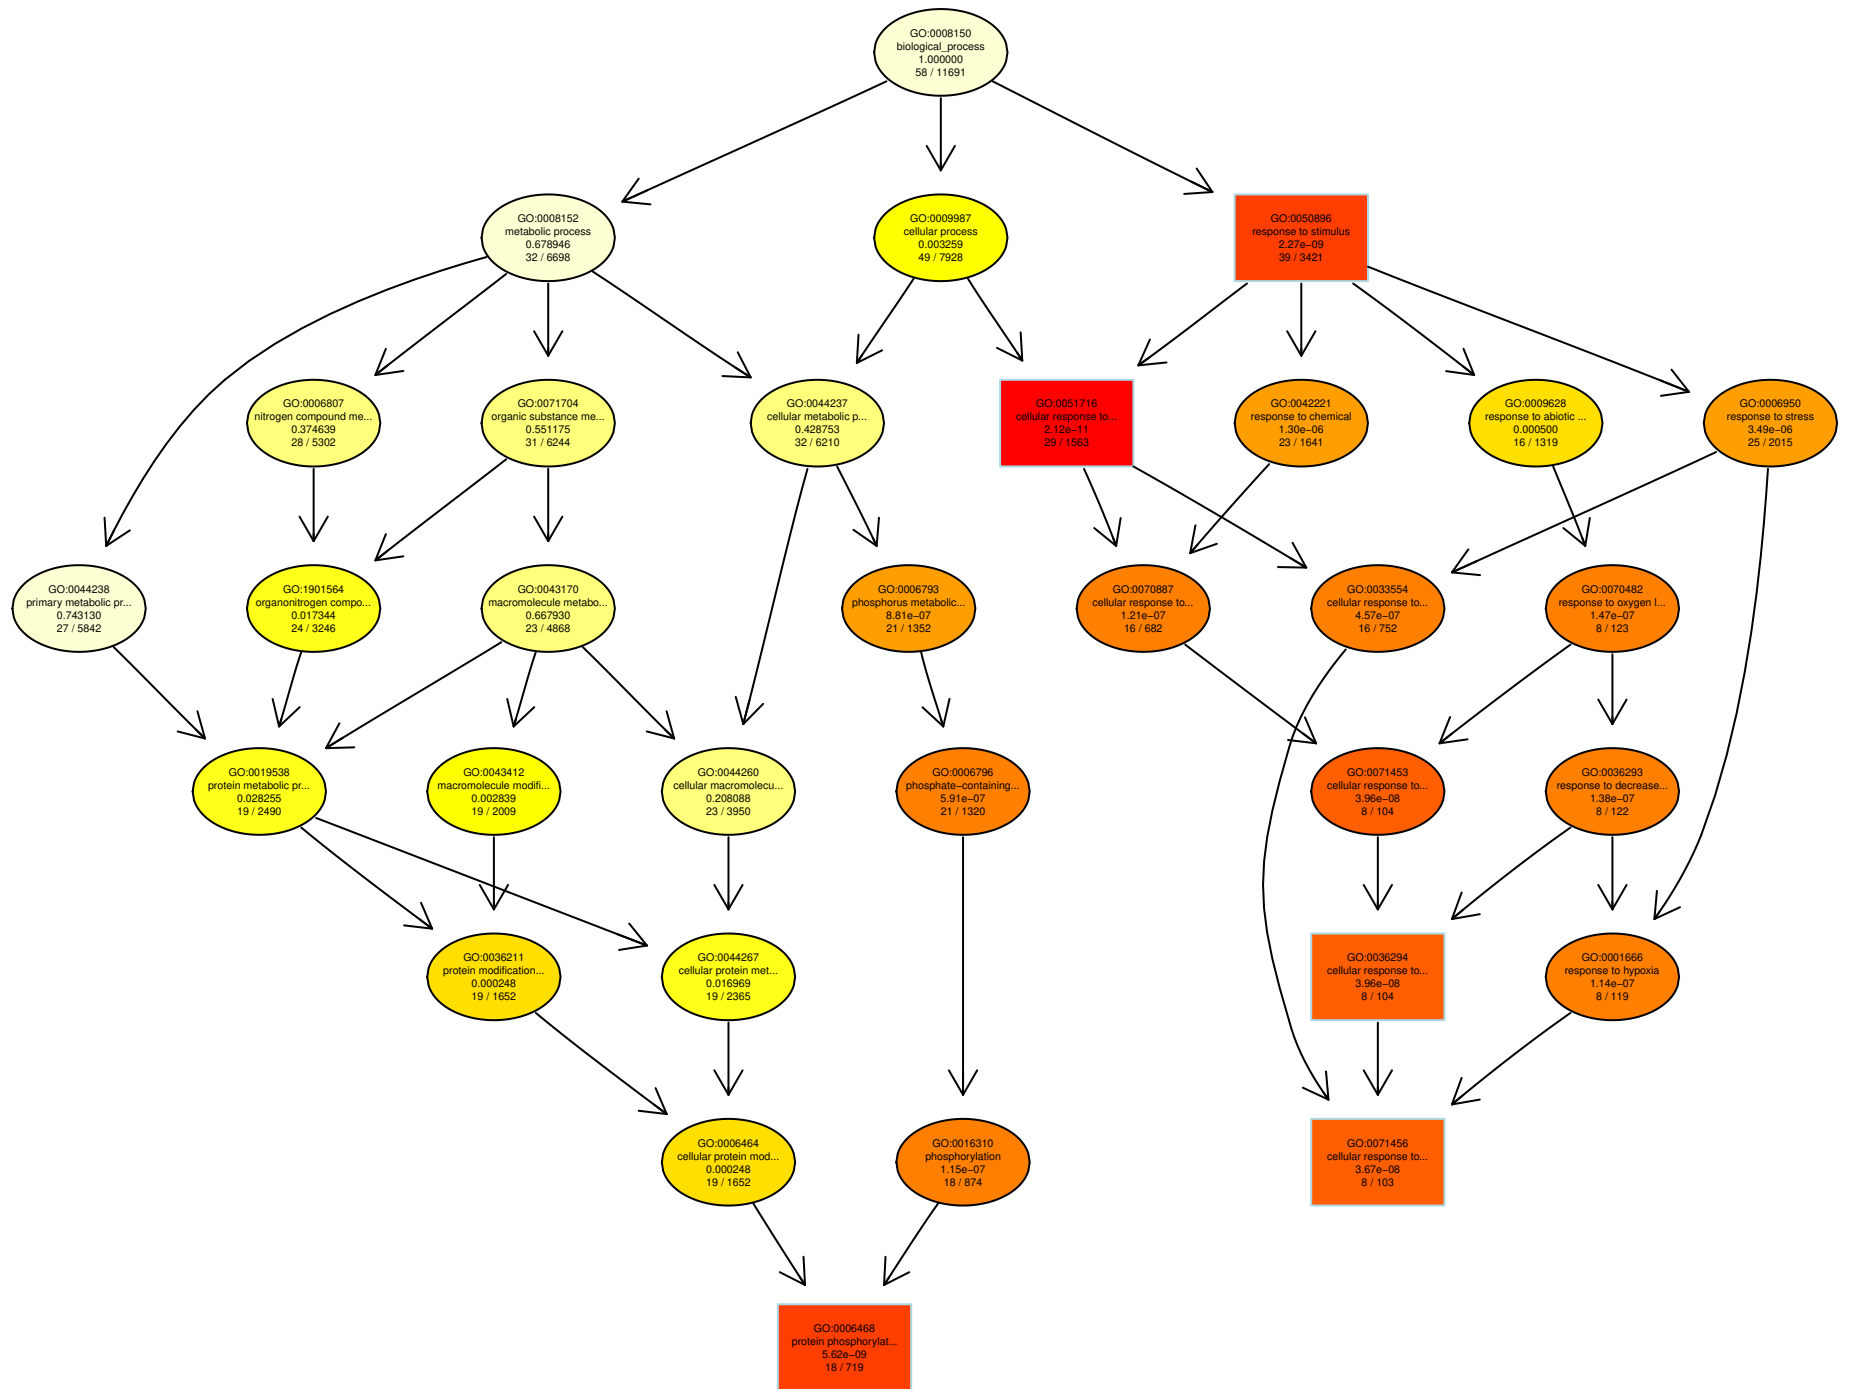

Supplement: PLD3-6-e396-s053.pdf [file PLD3-6-e396-s053.pdf]

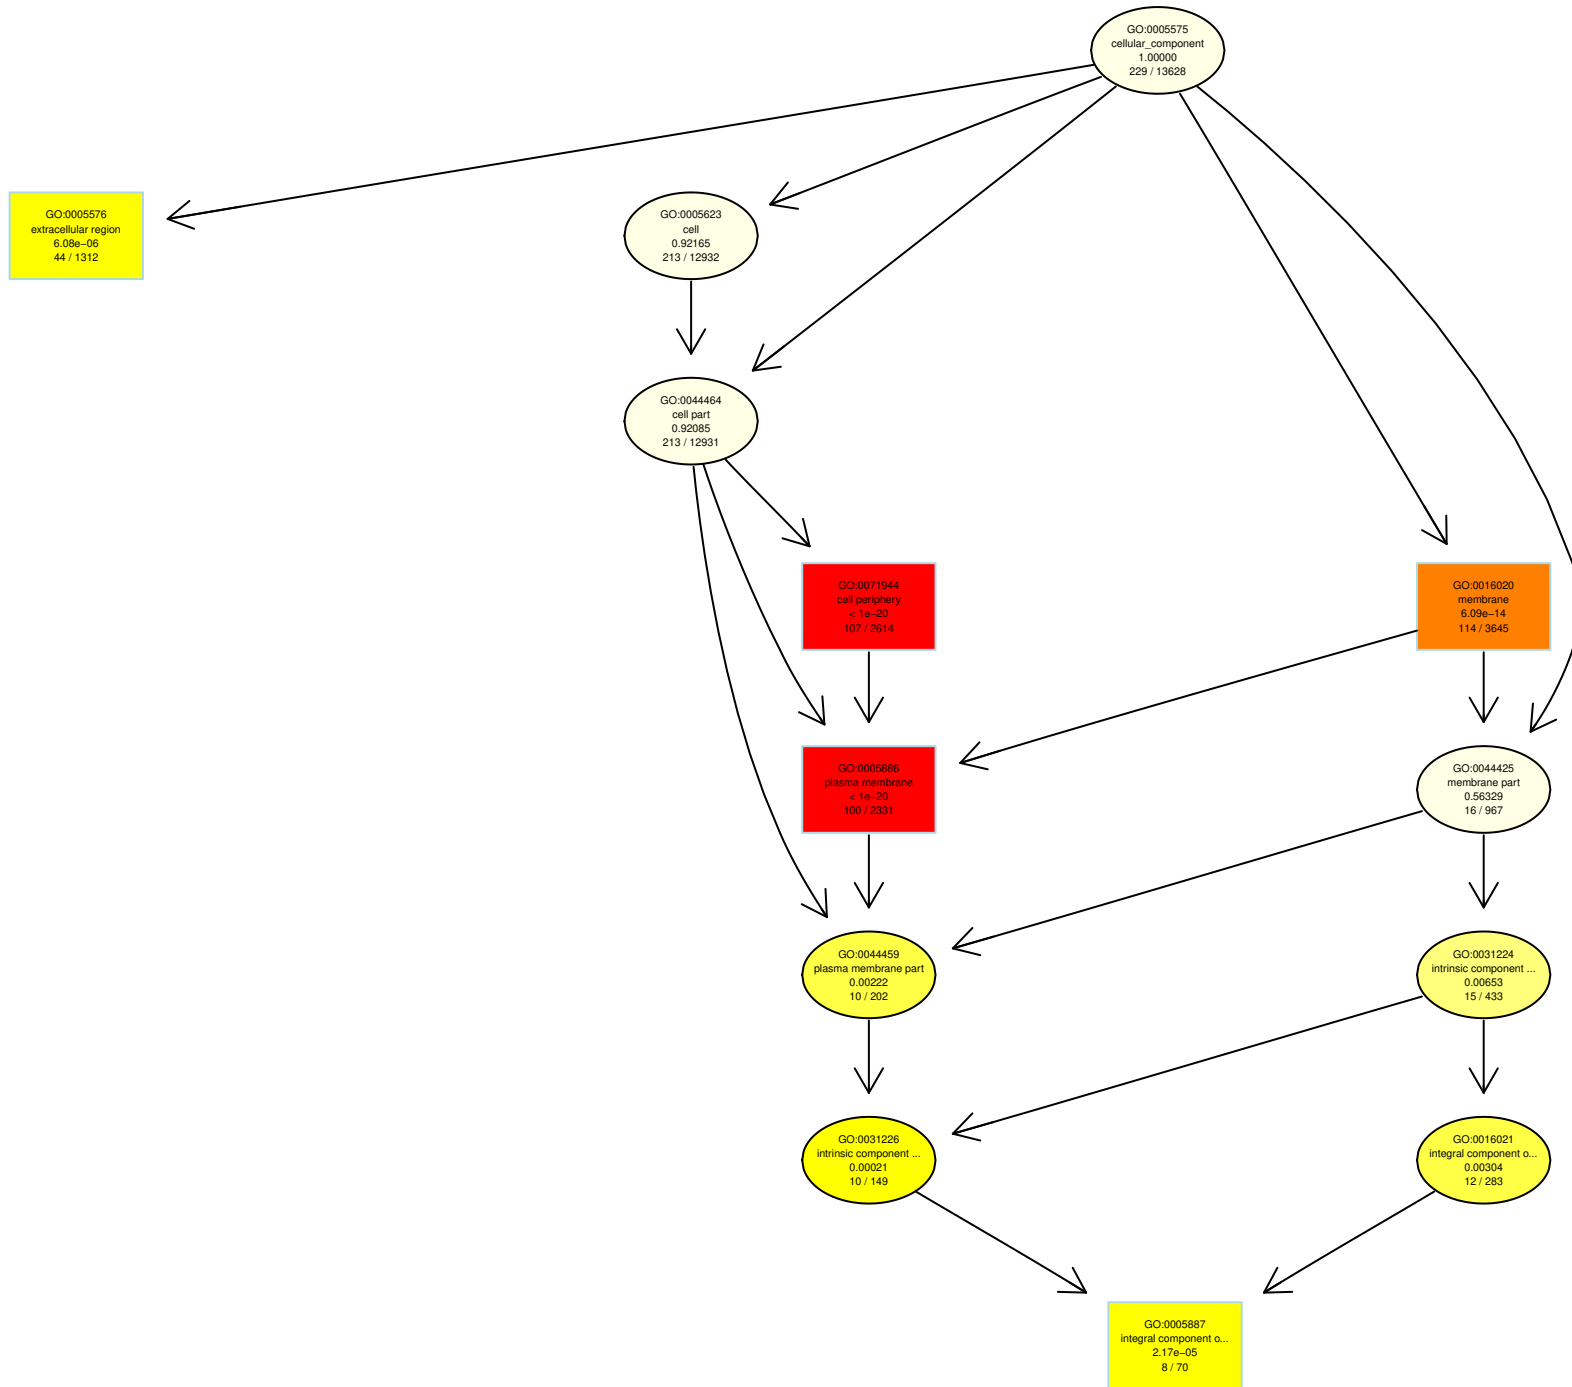

Supplement: PLD3-6-e396-s055.pdf [file PLD3-6-e396-s055.pdf]

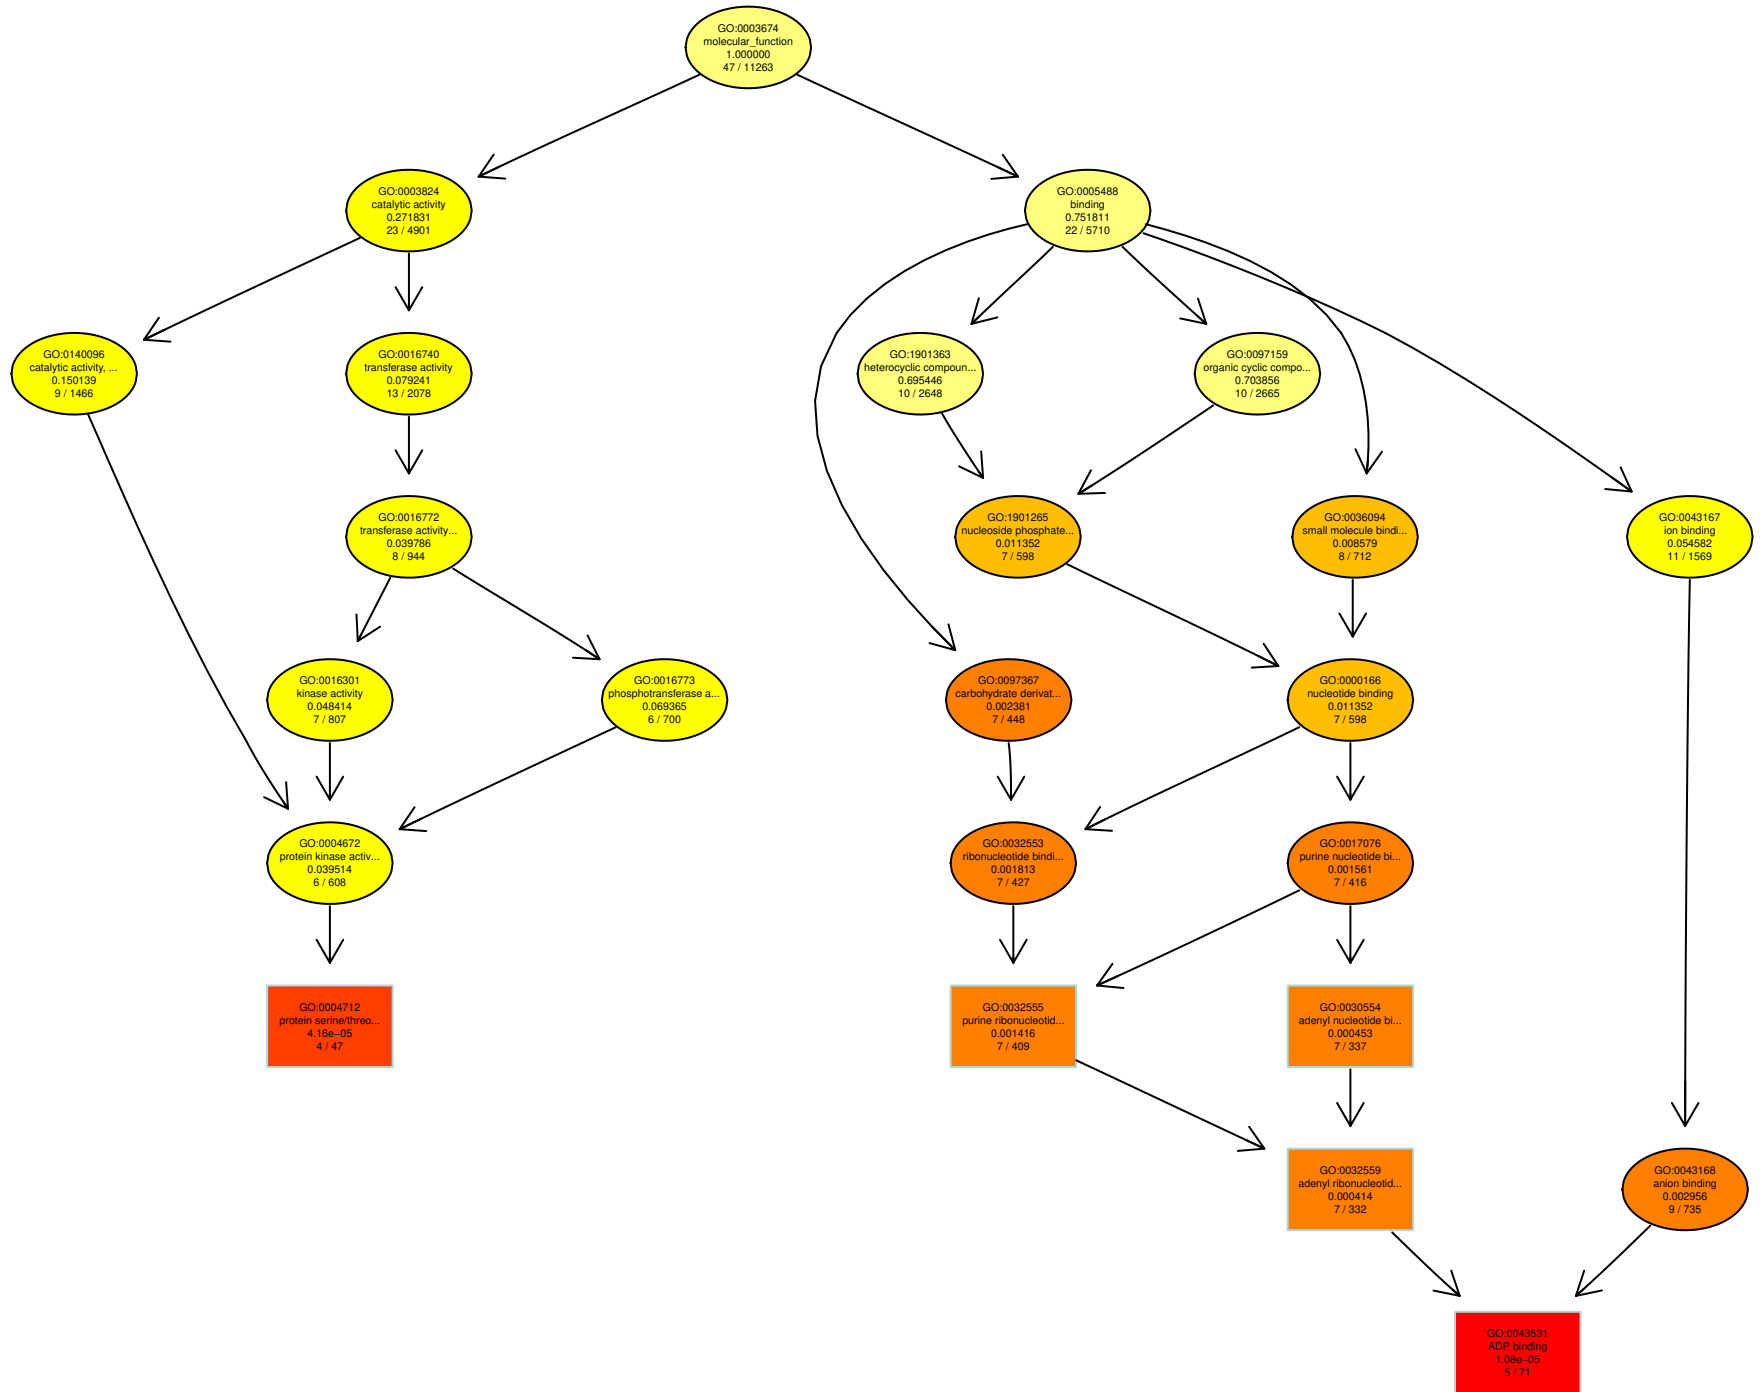

Supplement: PLD3-6-e396-s057.pdf [file PLD3-6-e396-s057.pdf]

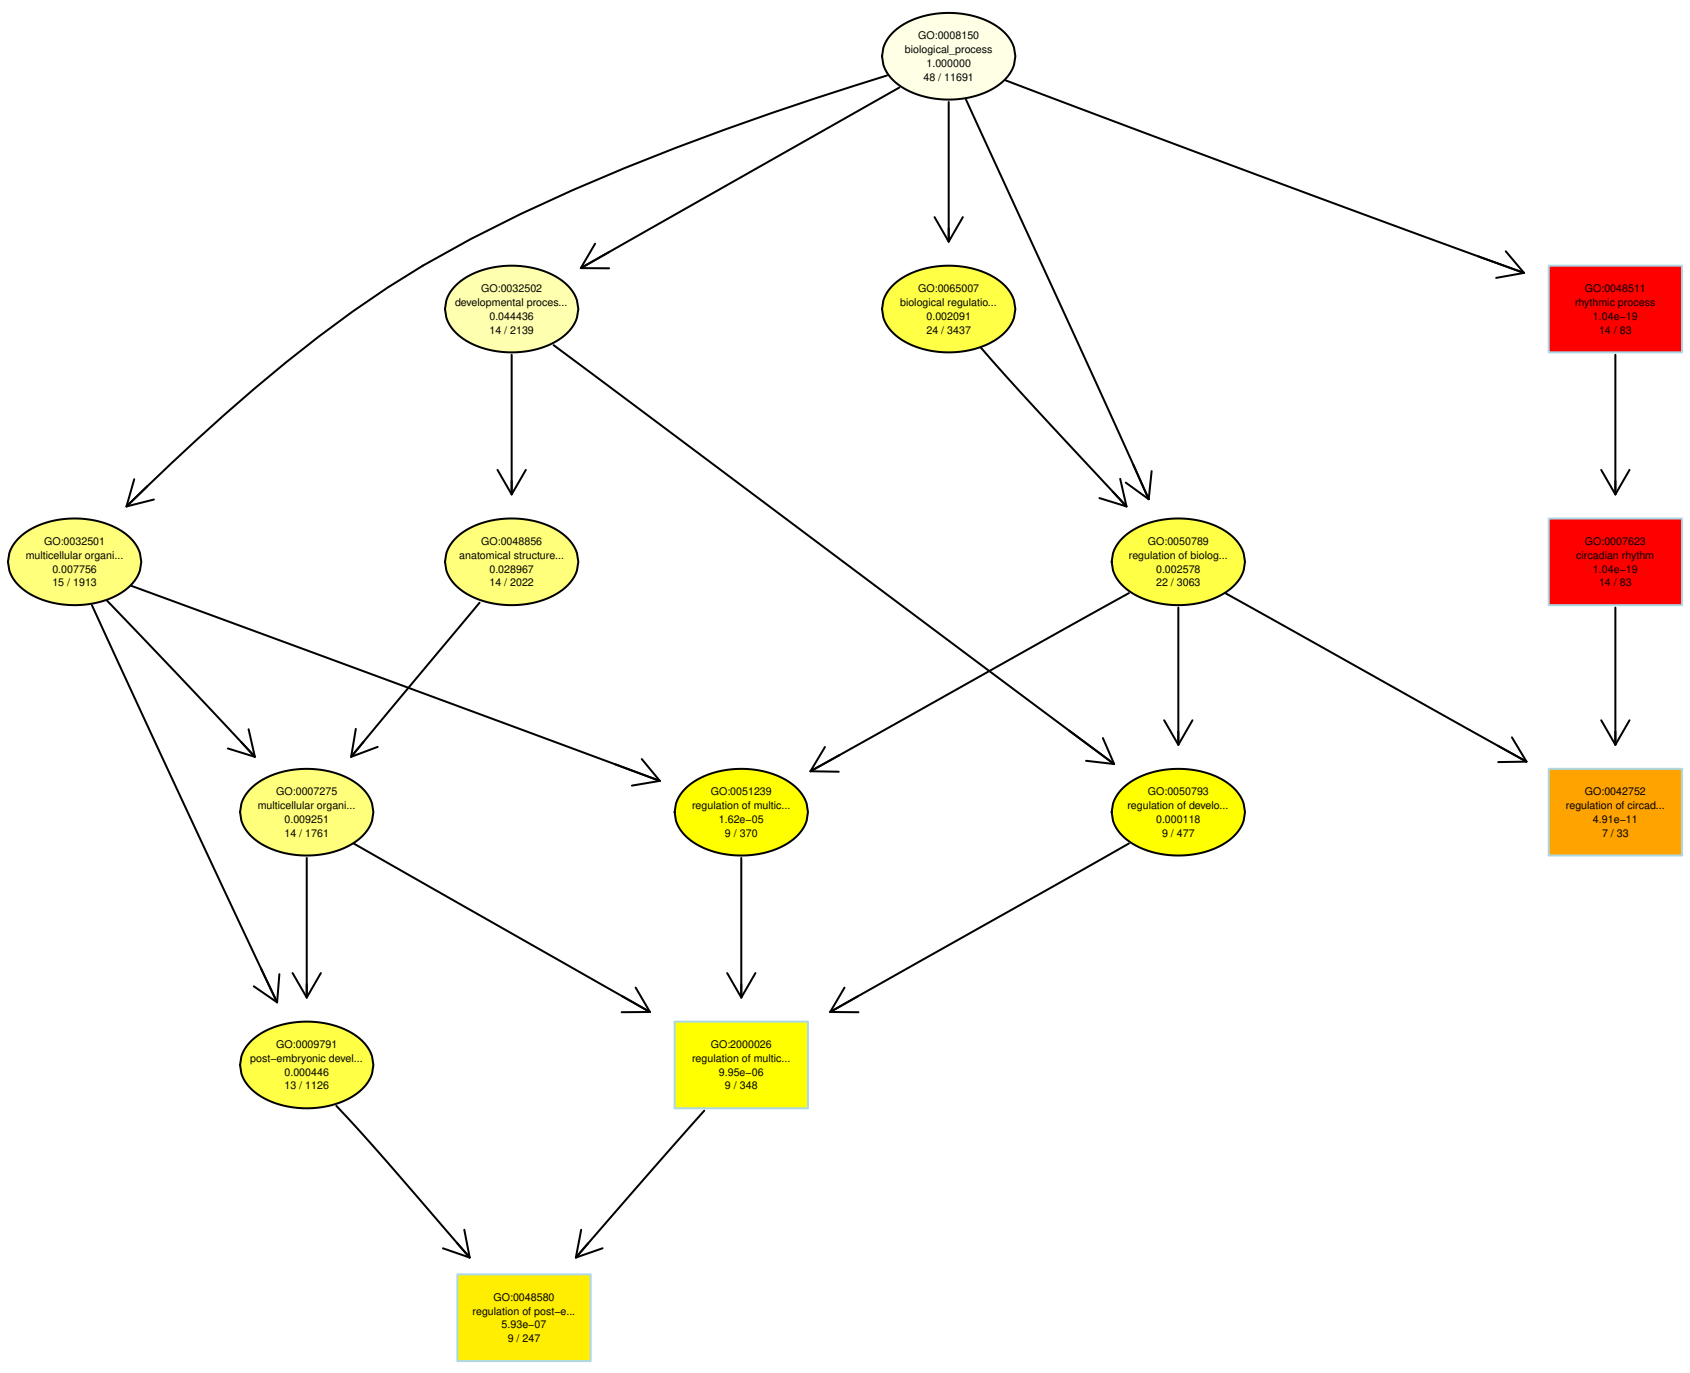

Supplement: PLD3-6-e396-s063.pdf [file PLD3-6-e396-s063.pdf]

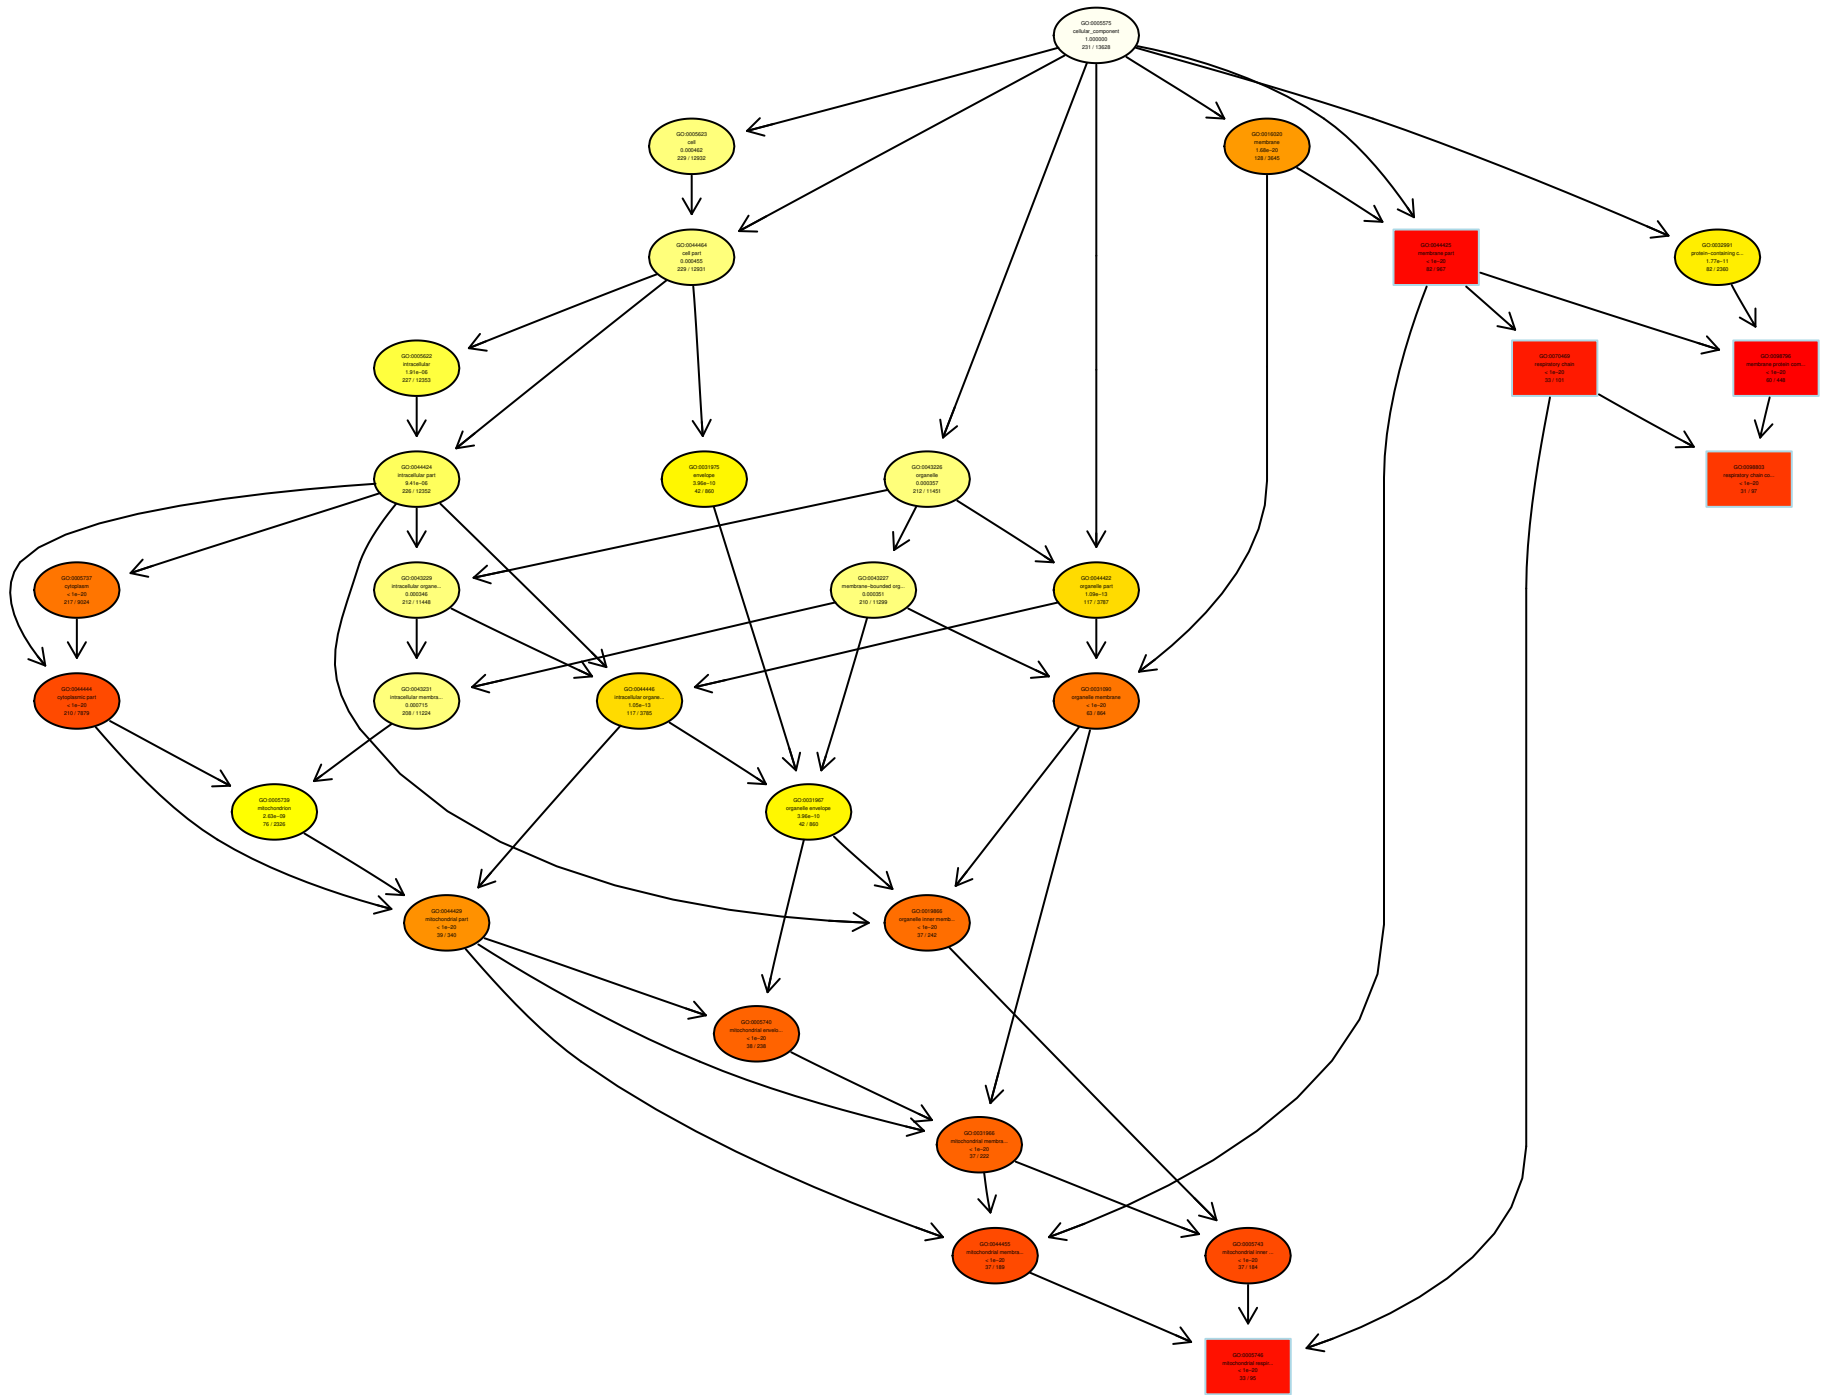

Supplement: PLD3-6-e396-s065.pdf [file PLD3-6-e396-s065.pdf]

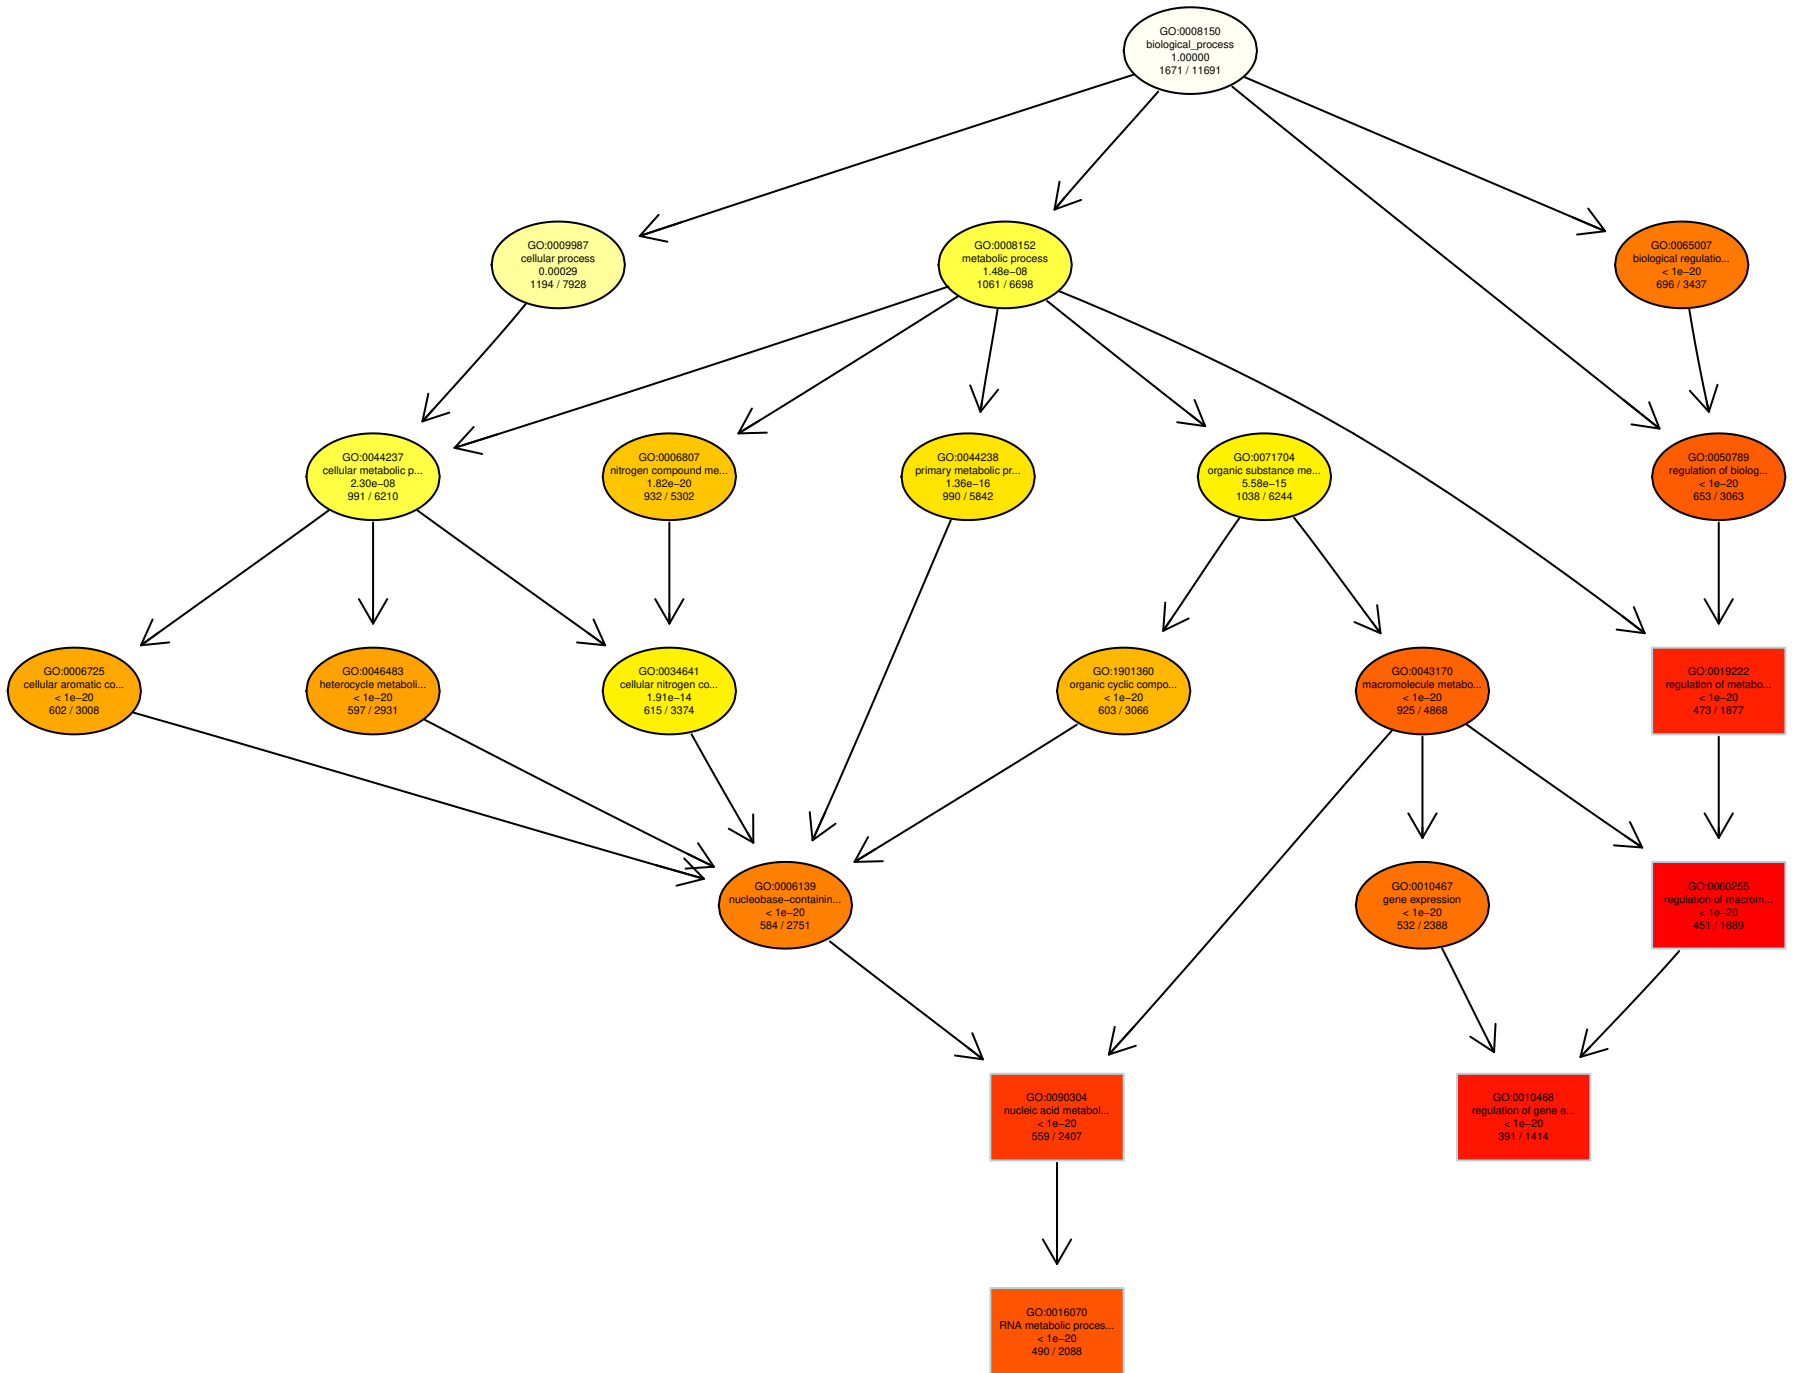

Supplement: PLD3-6-e396-s066.pdf [file PLD3-6-e396-s066.pdf]

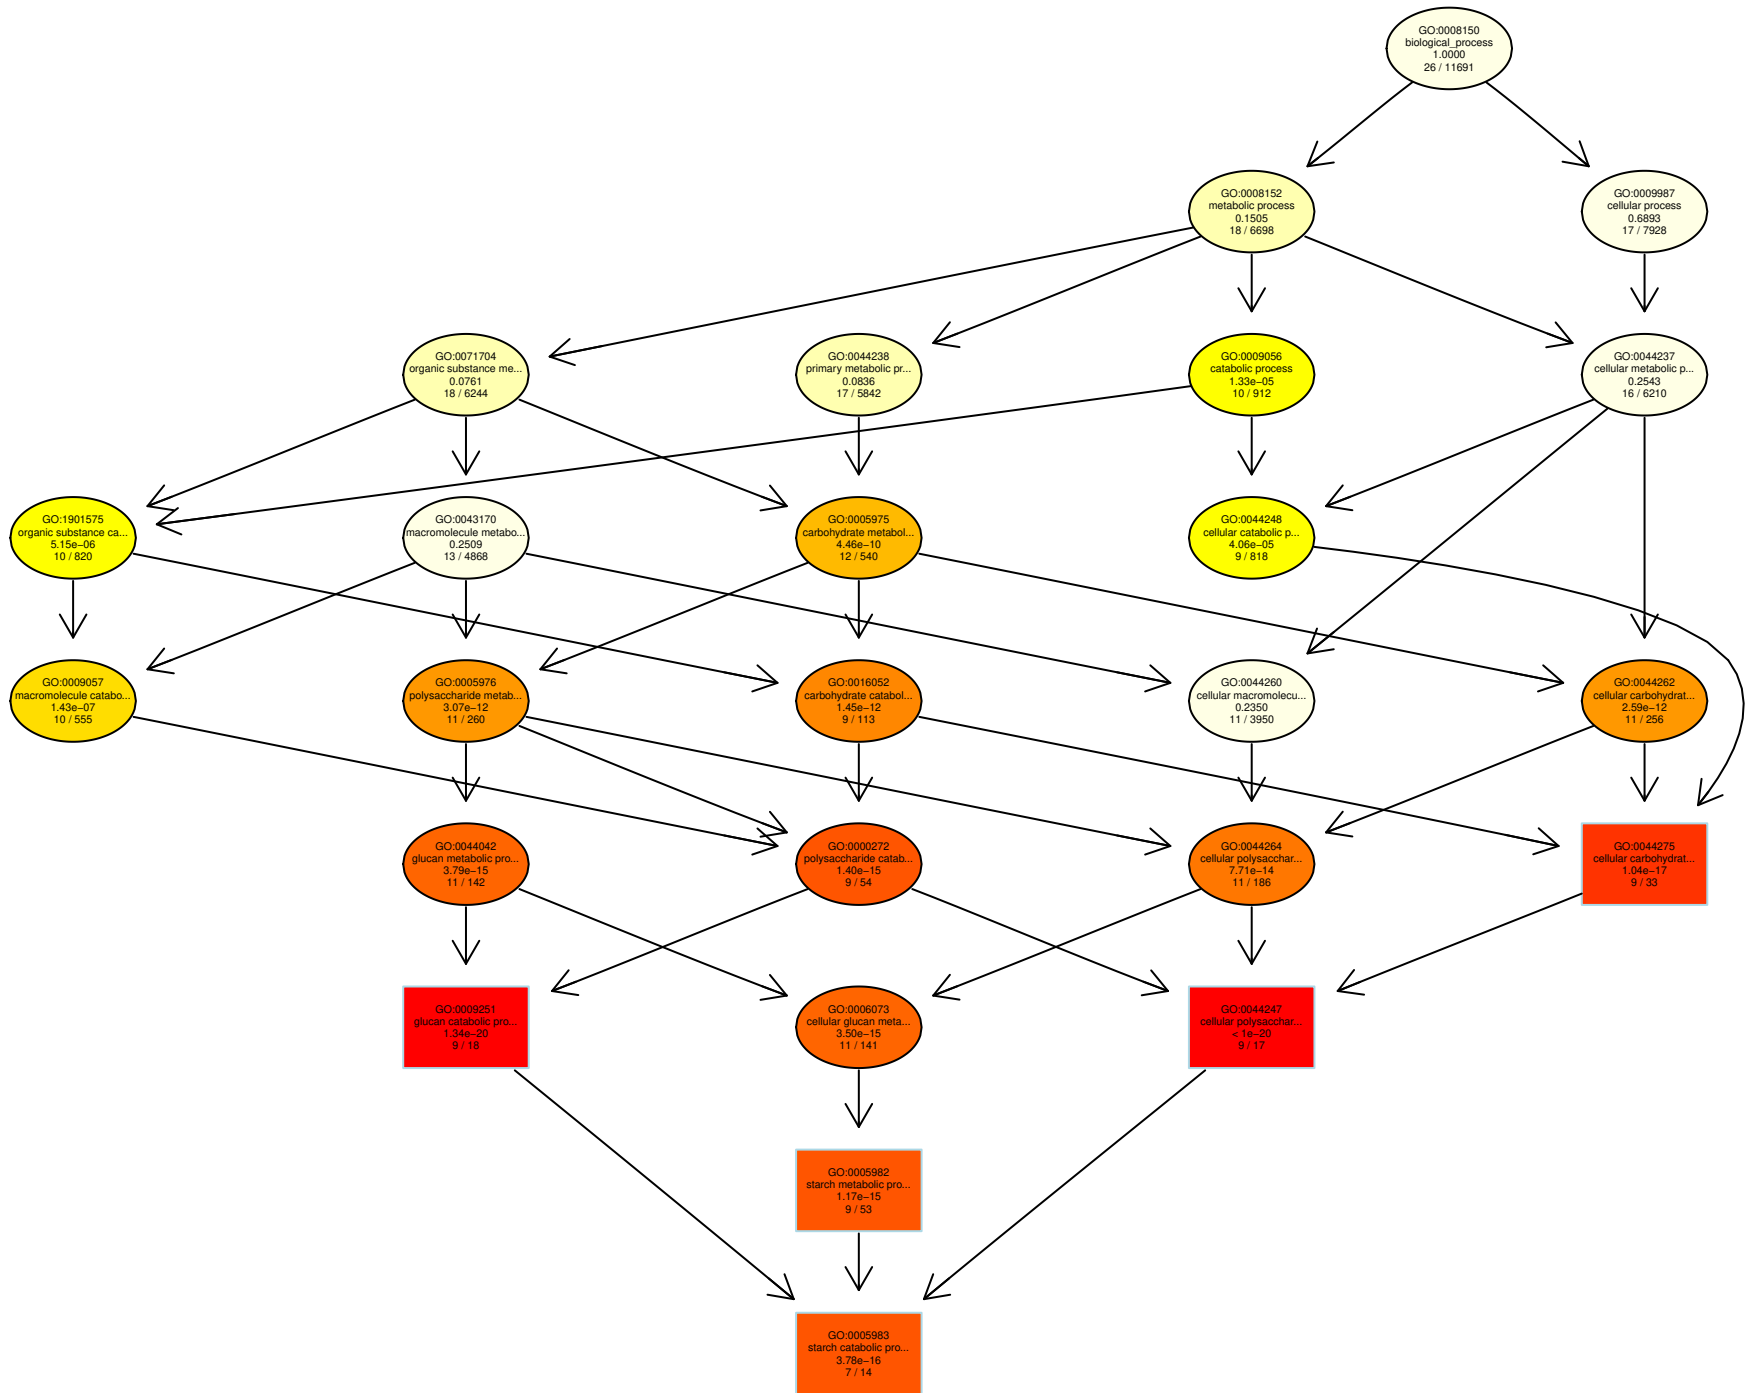

Supplement: PLD3-6-e396-s070.pdf [file PLD3-6-e396-s070.pdf]

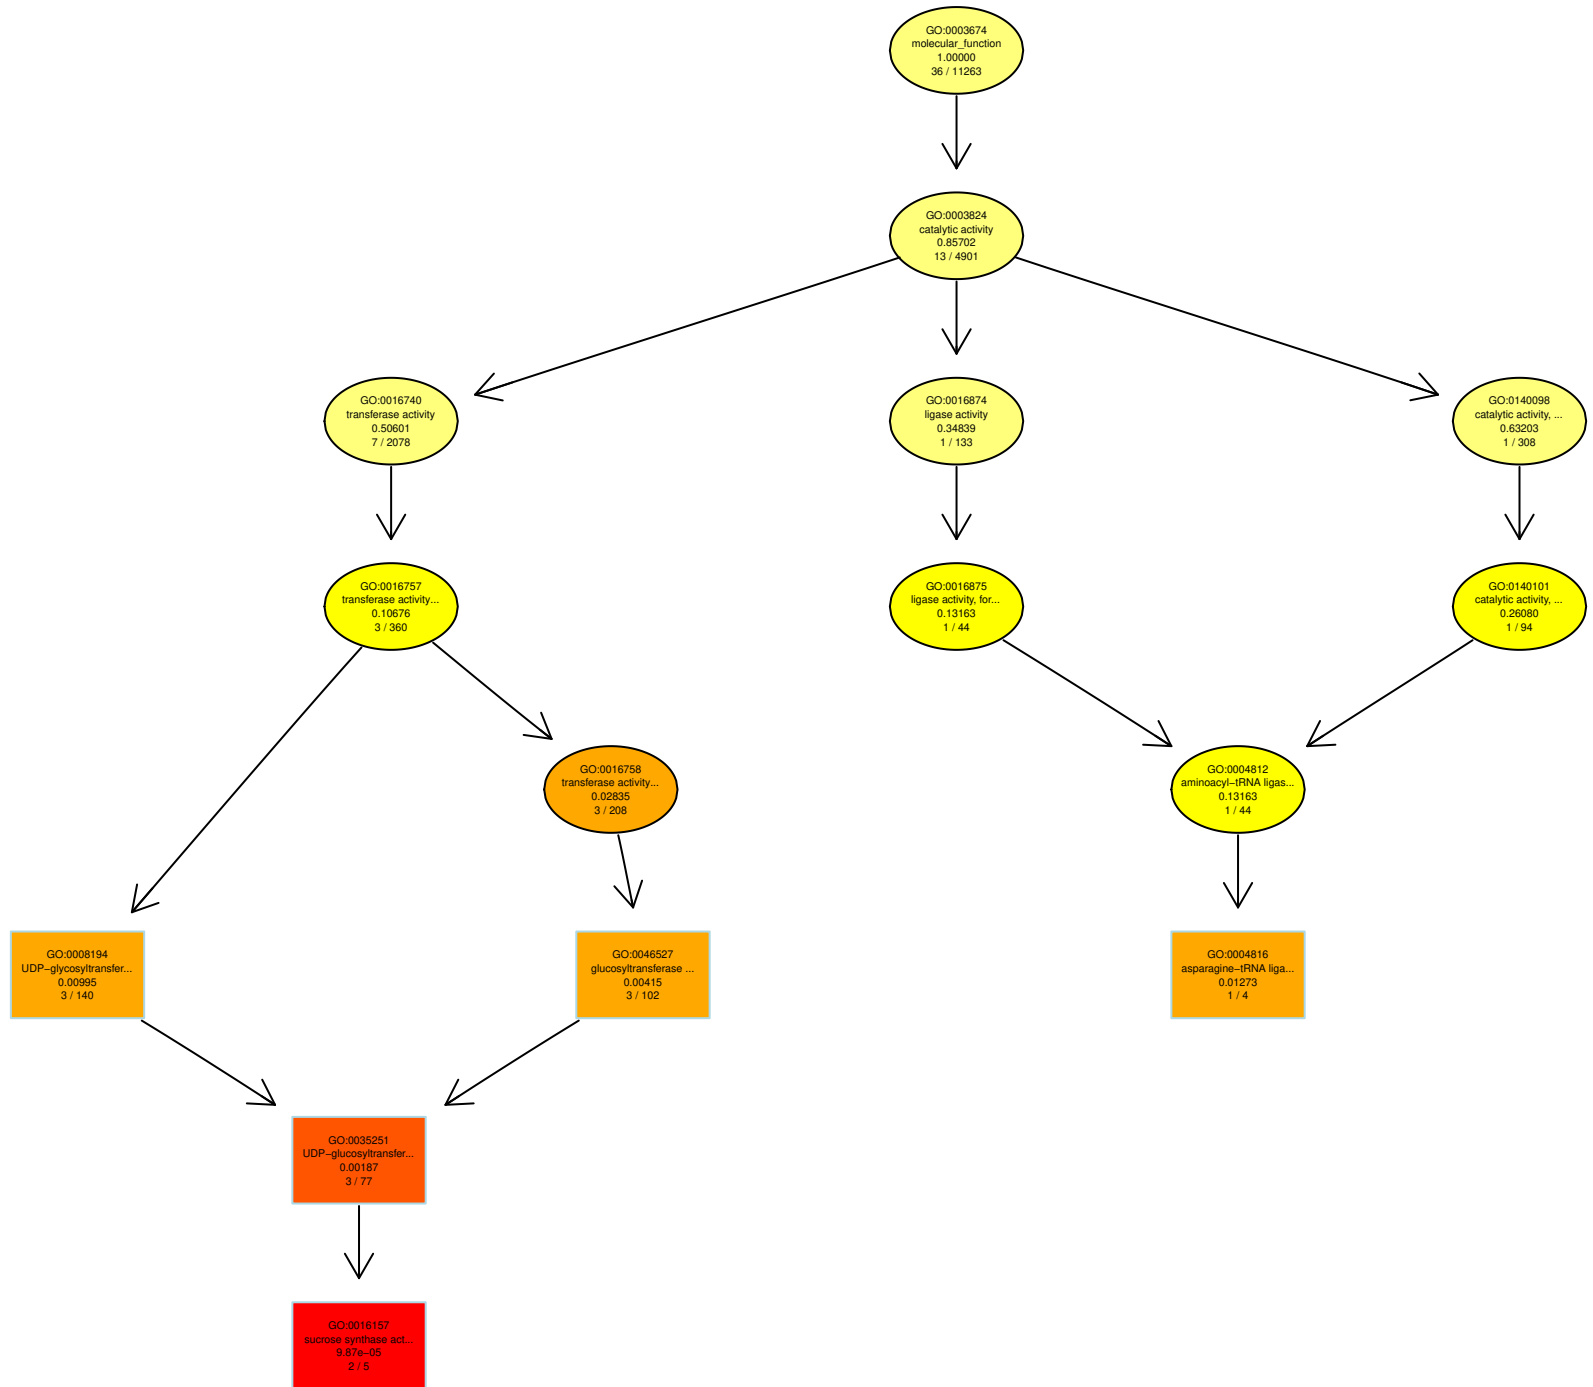

Supplement: PLD3-6-e396-s071.pdf [file PLD3-6-e396-s071.pdf]

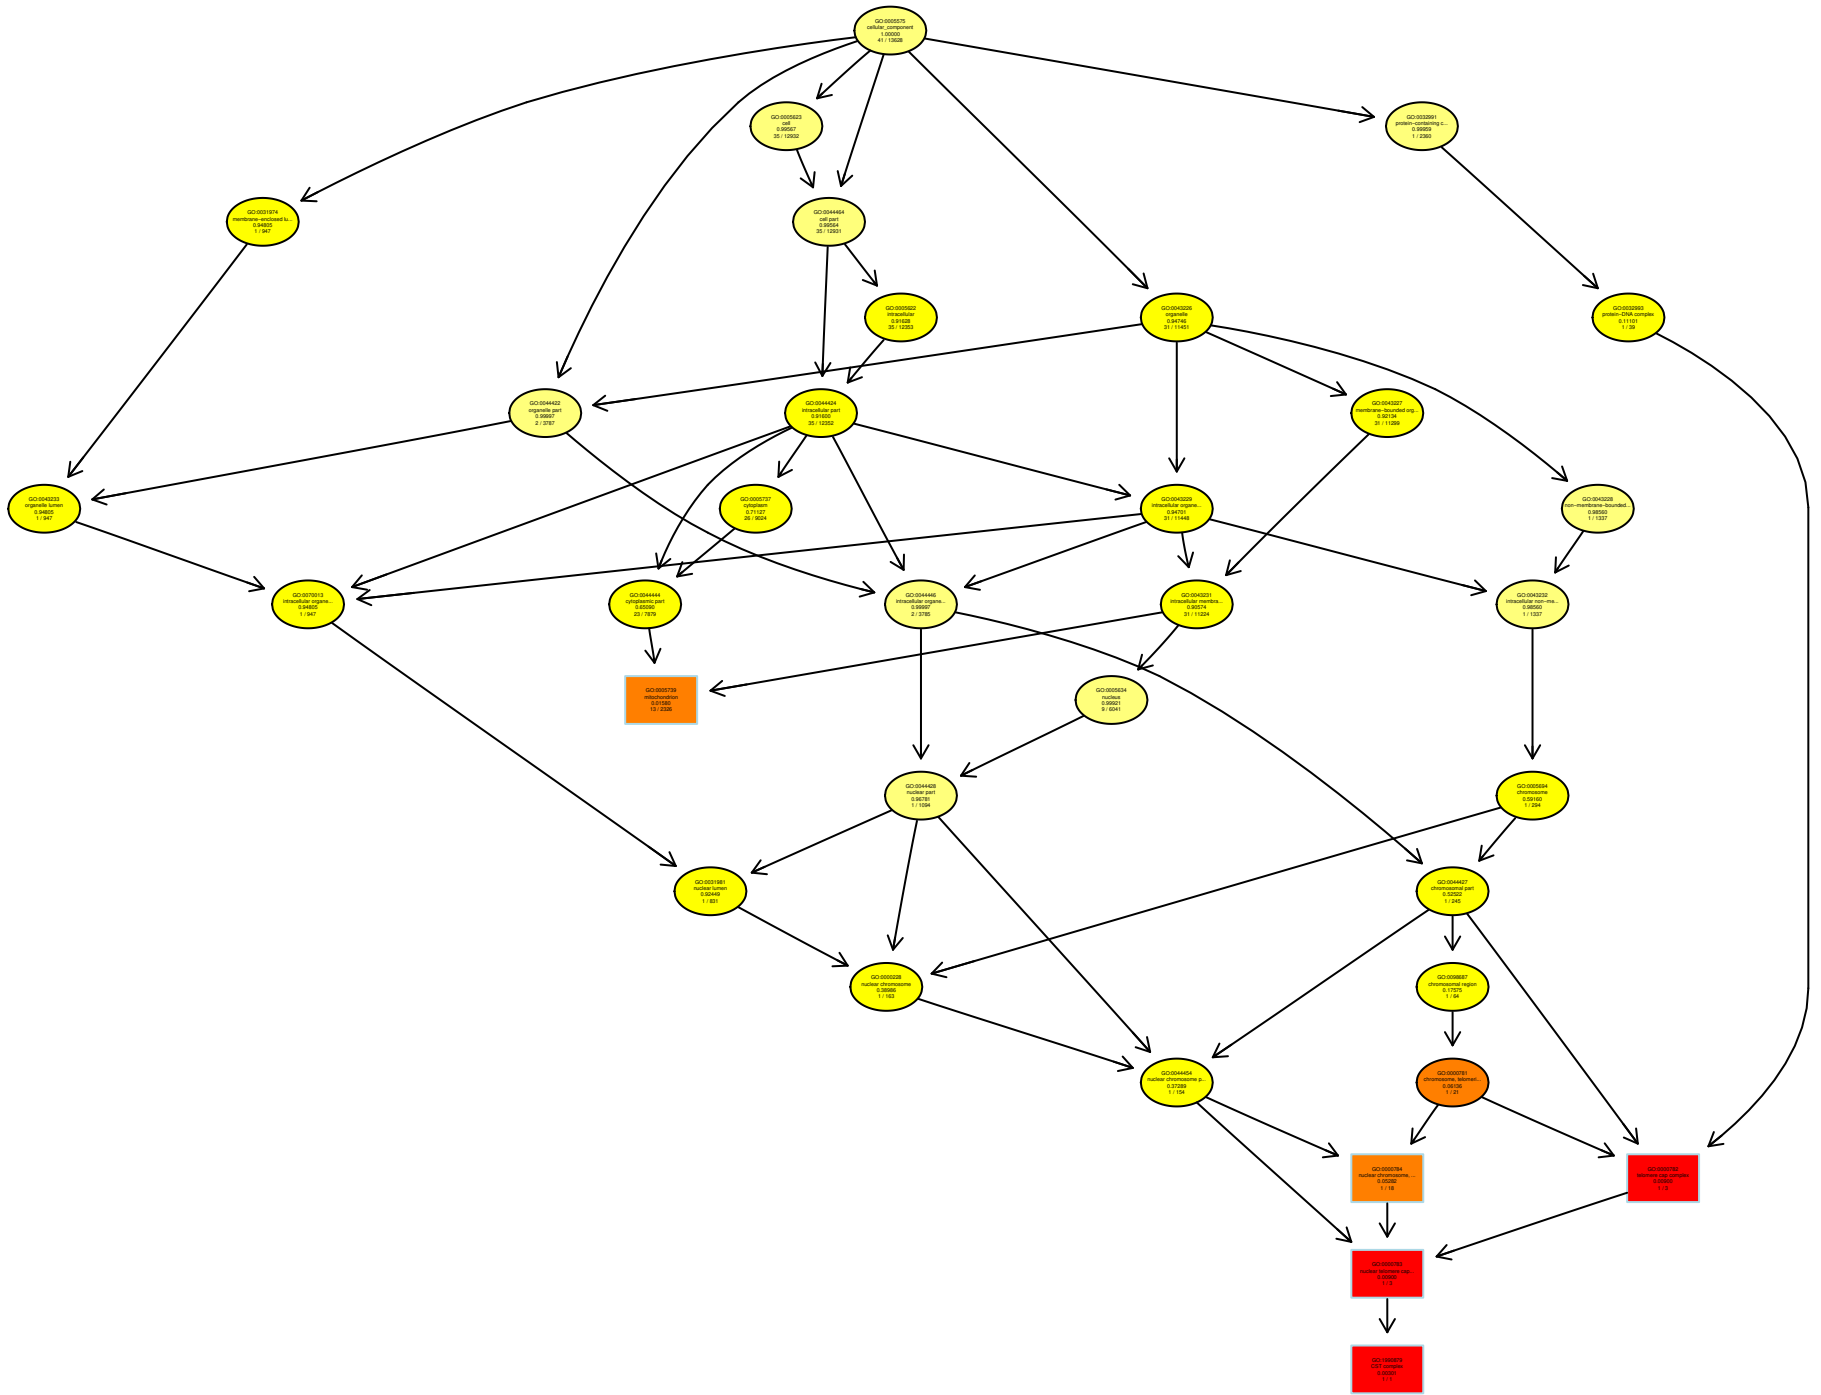

Supplement: PLD3-6-e396-s074.pdf [file PLD3-6-e396-s074.pdf]

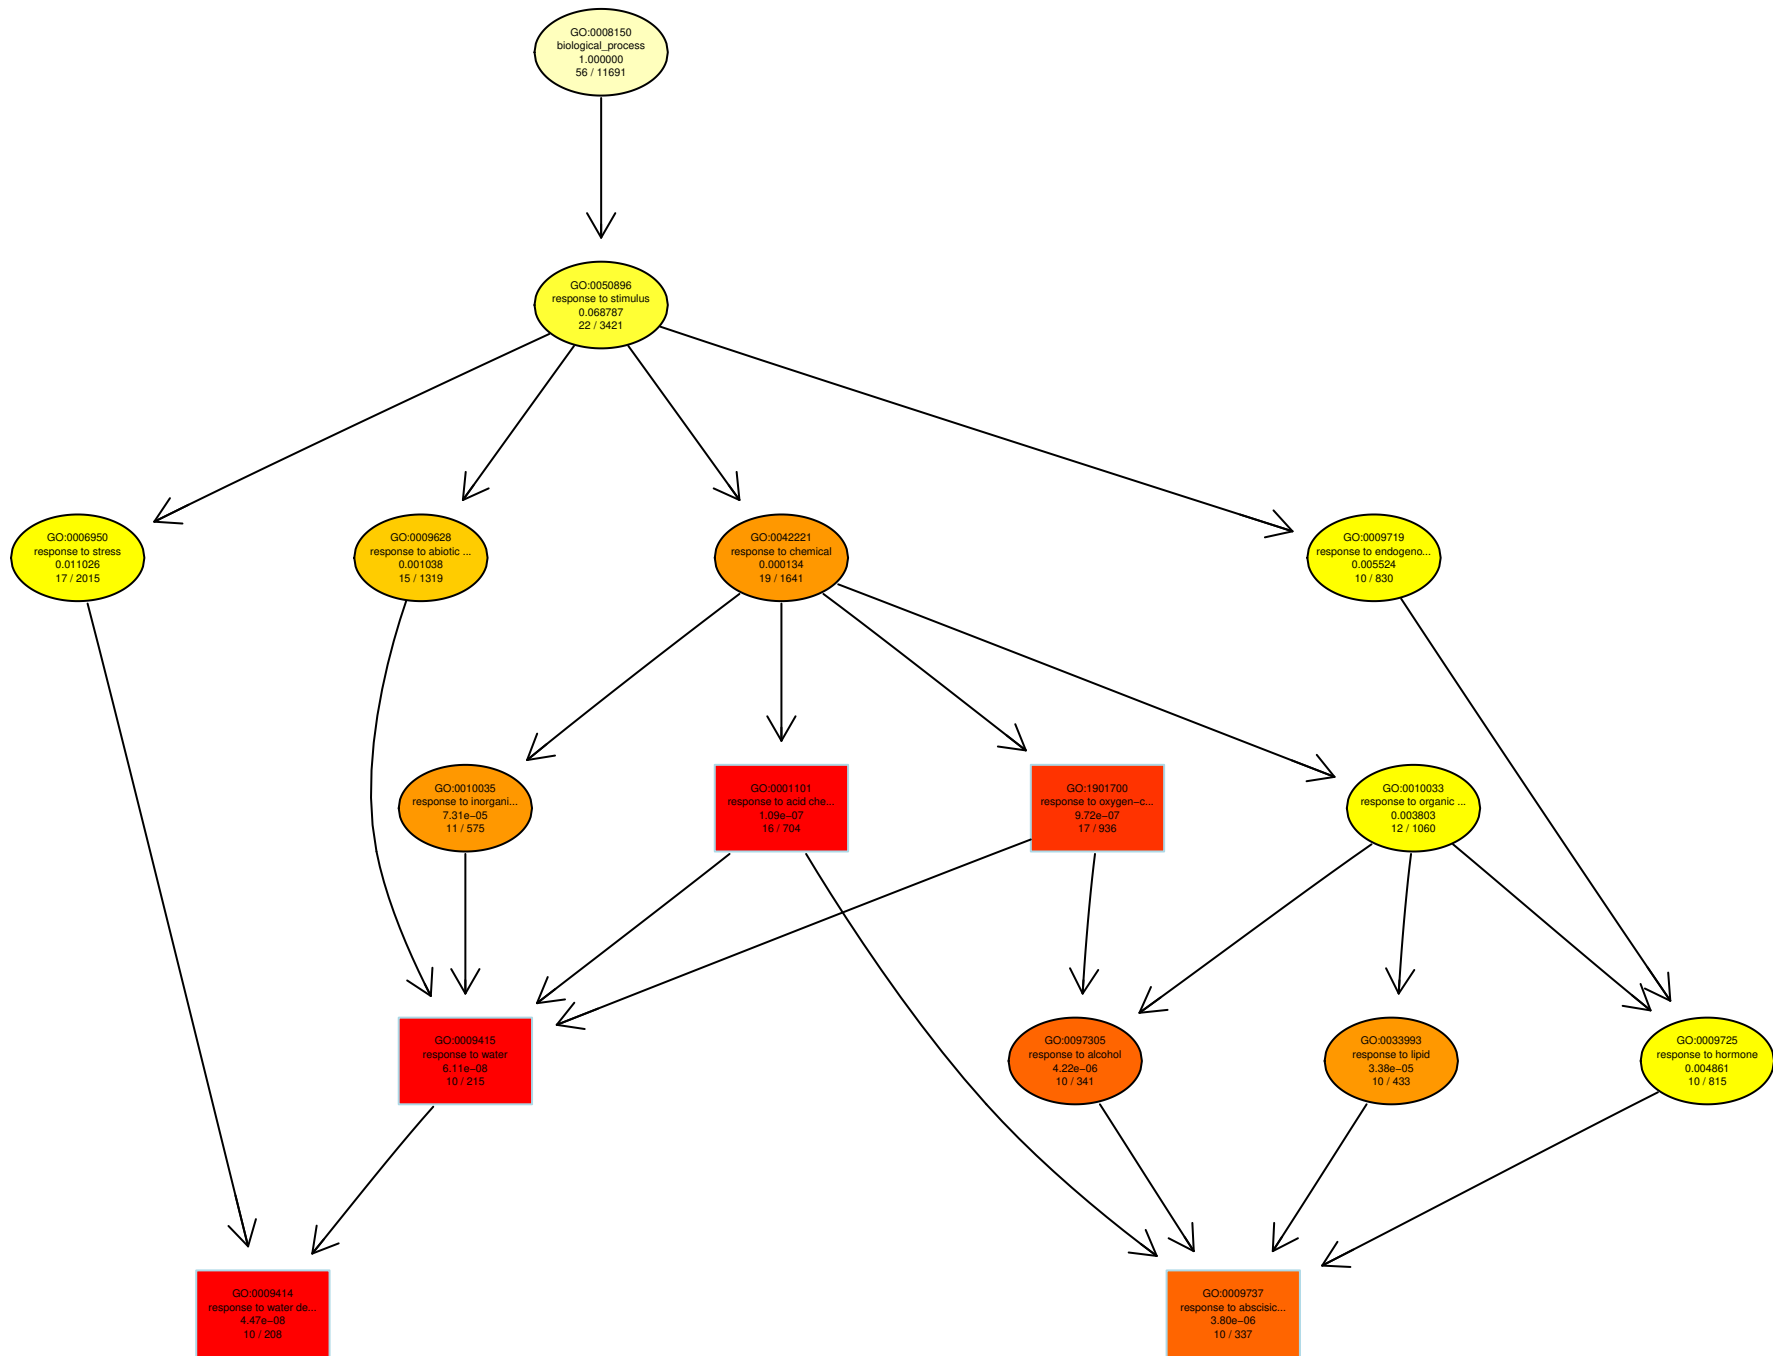

Supplement: PLD3-6-e396-s081.pdf [file PLD3-6-e396-s081.pdf]

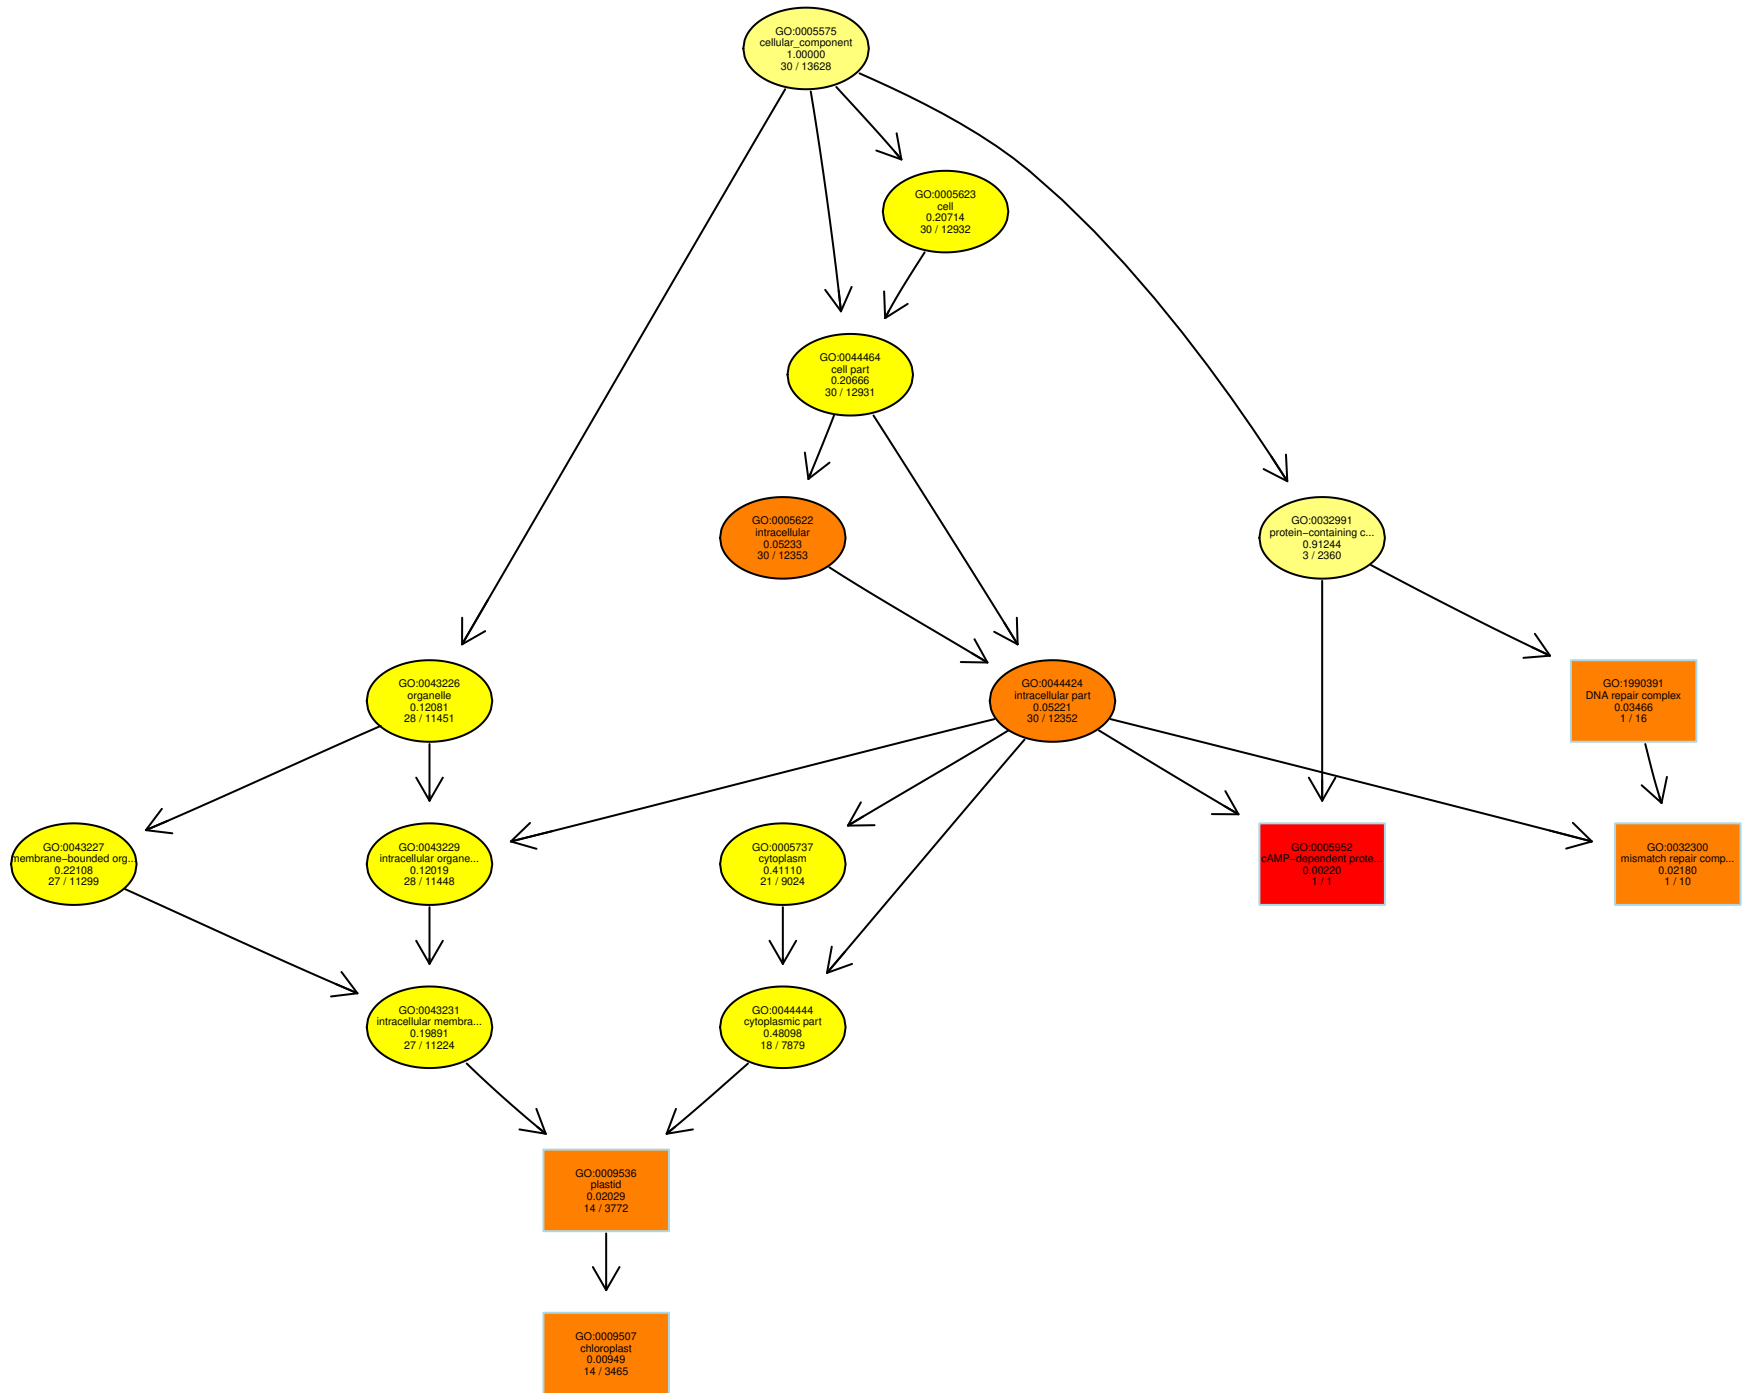

Supplement: PLD3-6-e396-s082.pdf [file PLD3-6-e396-s082.pdf]

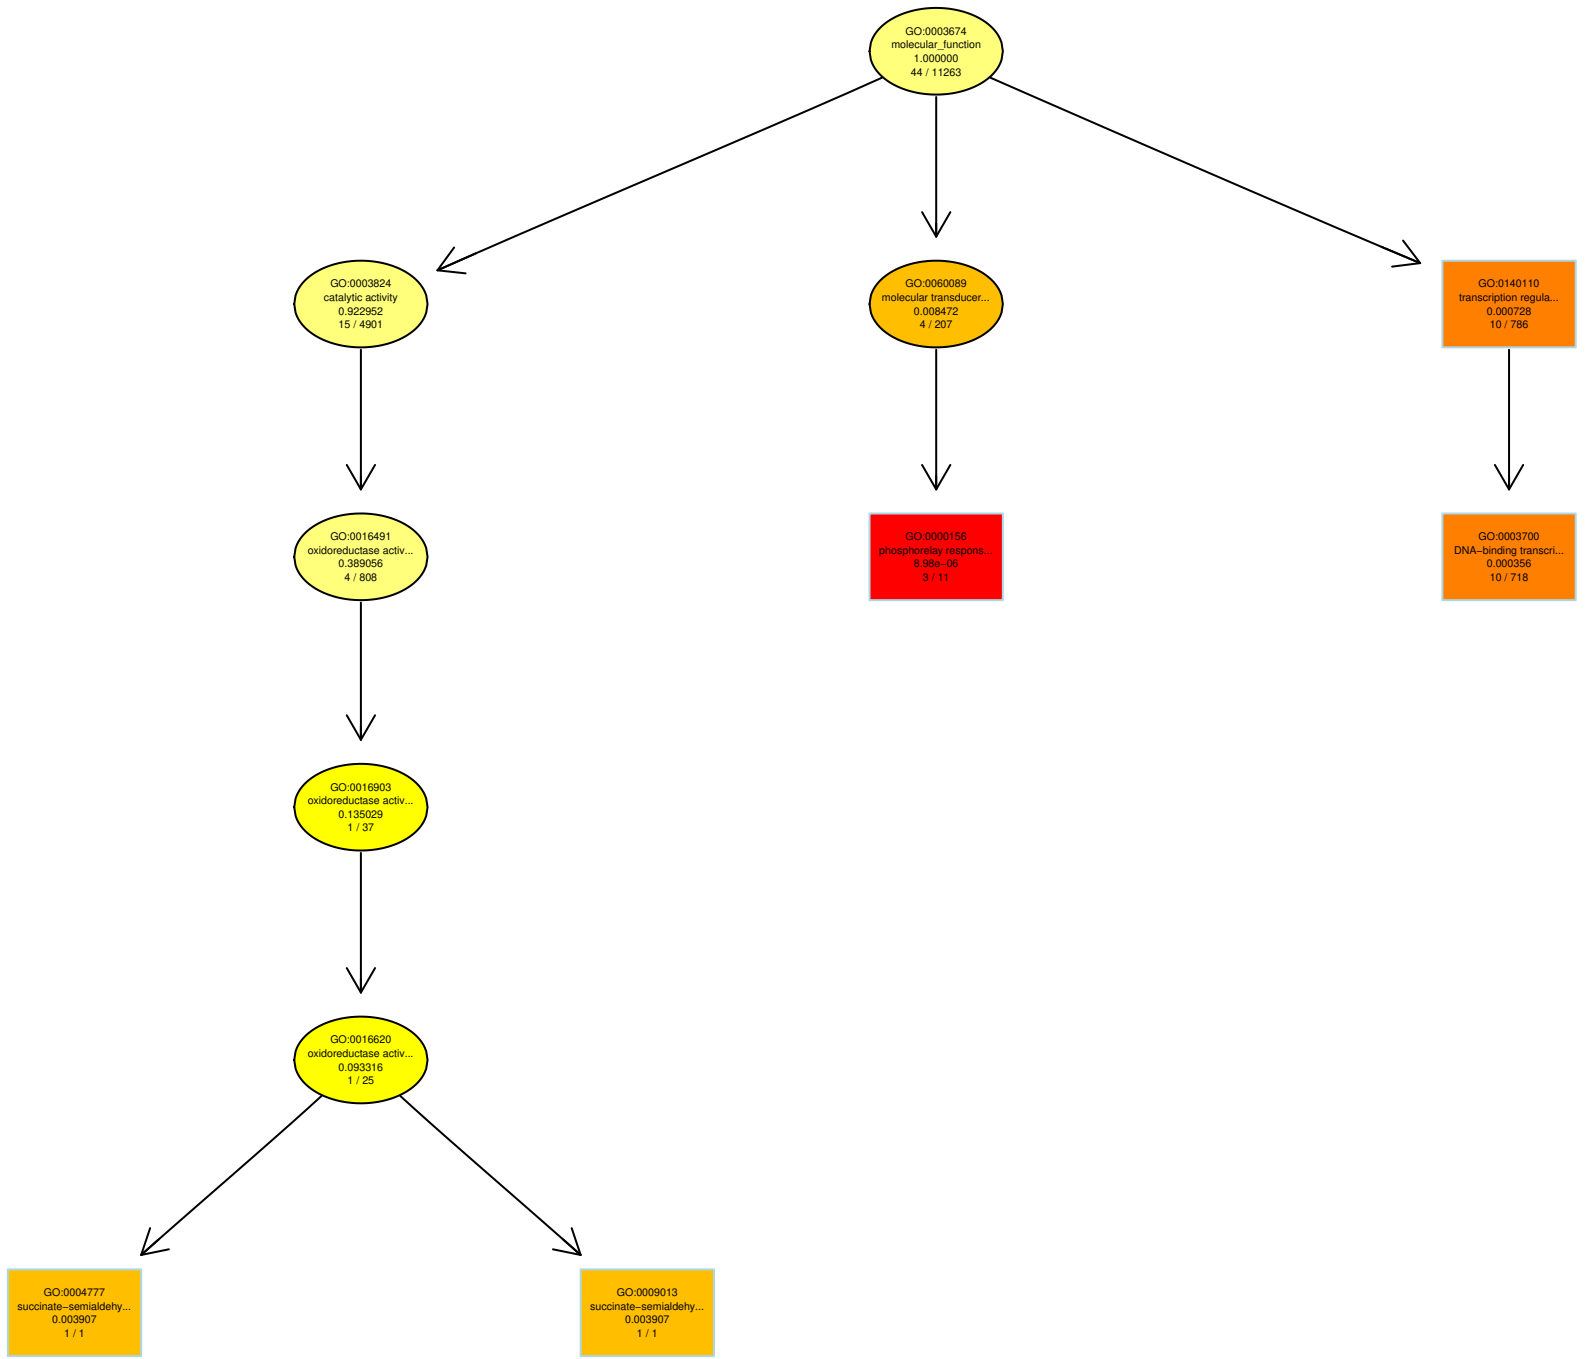

Supplement: PLD3-6-e396-s084.pdf [file PLD3-6-e396-s084.pdf]

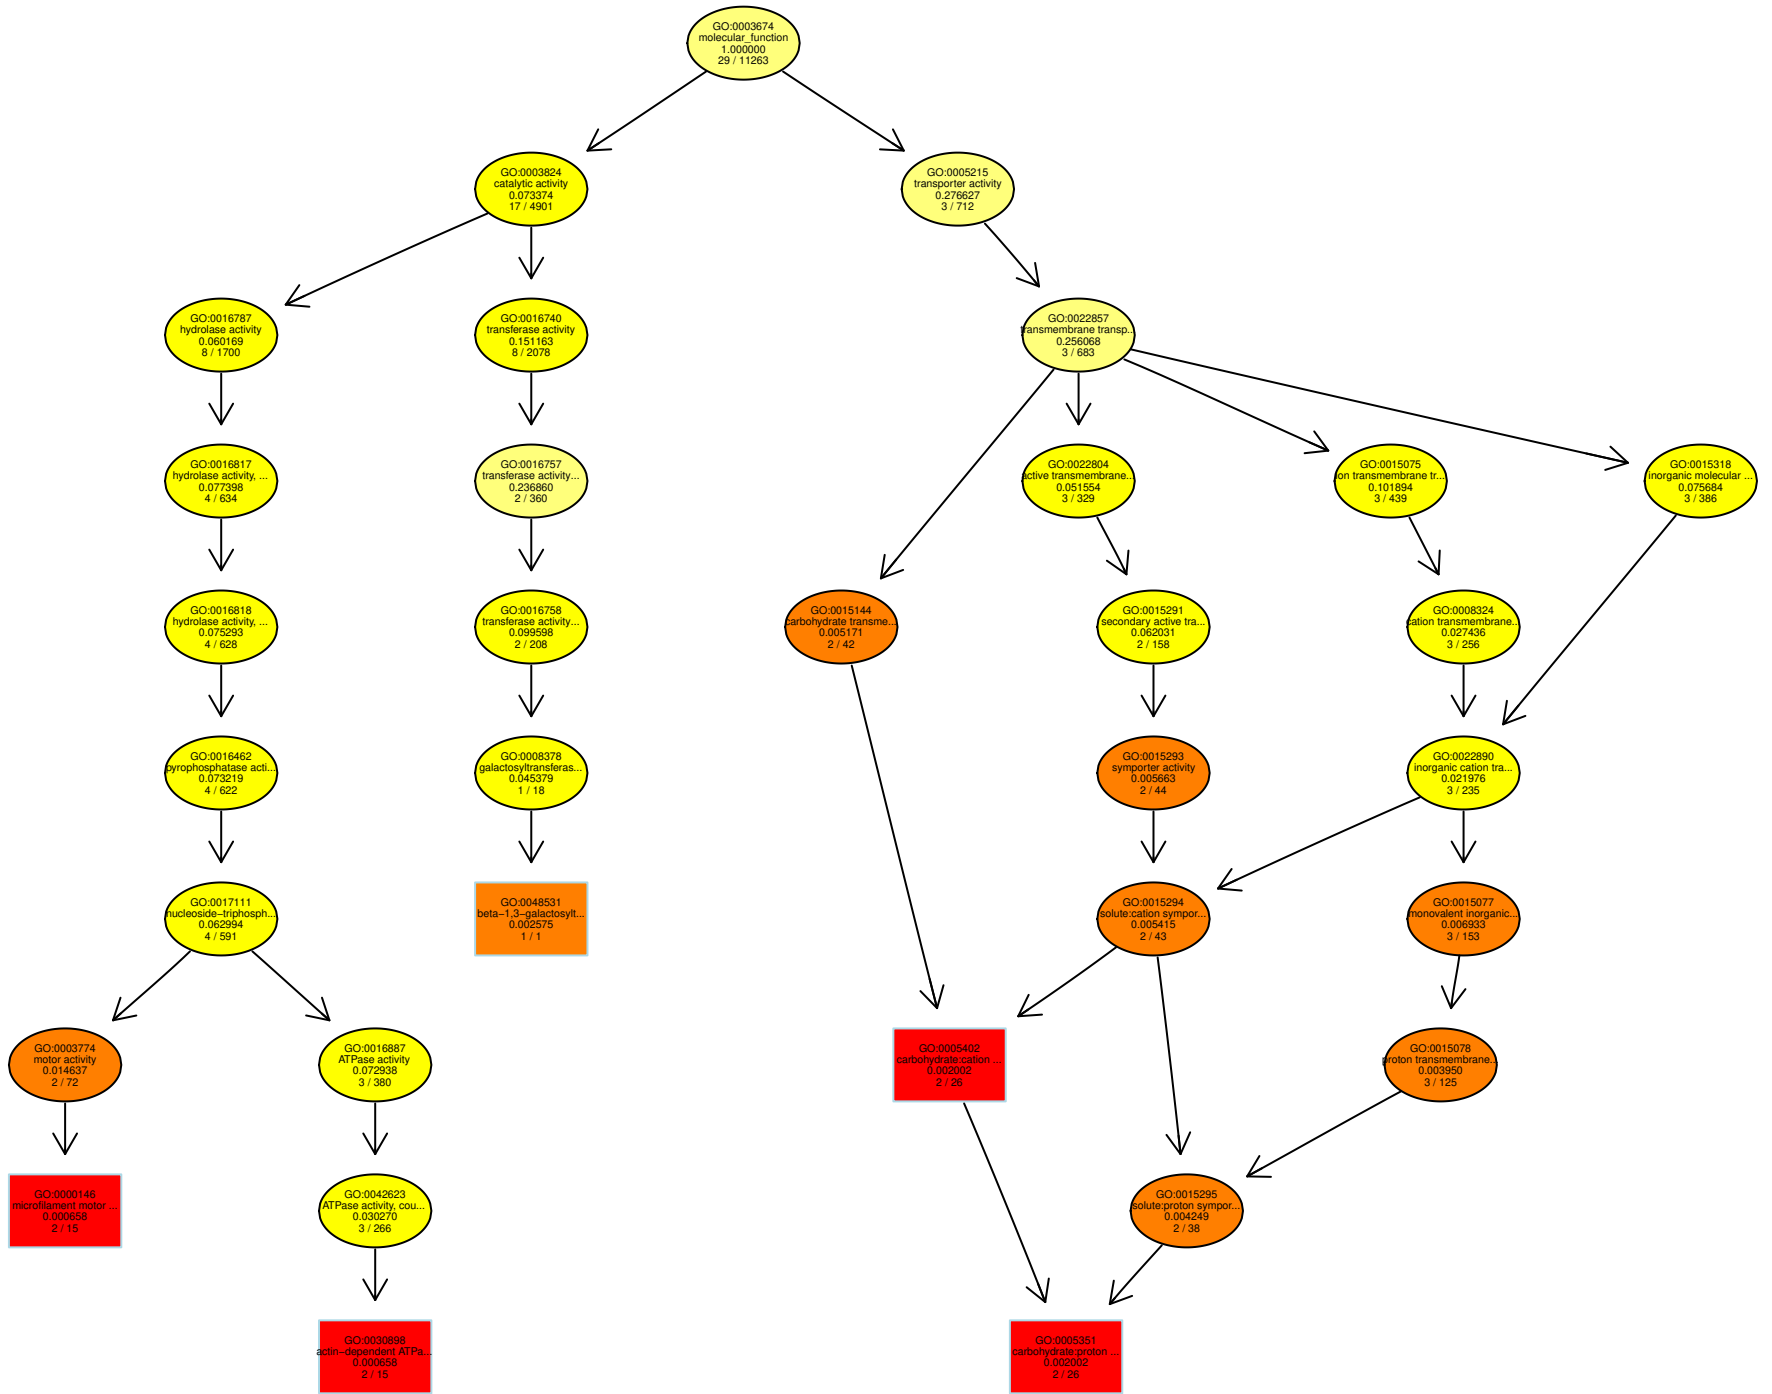

Supplement: PLD3-6-e396-s086.pdf [file PLD3-6-e396-s086.pdf]

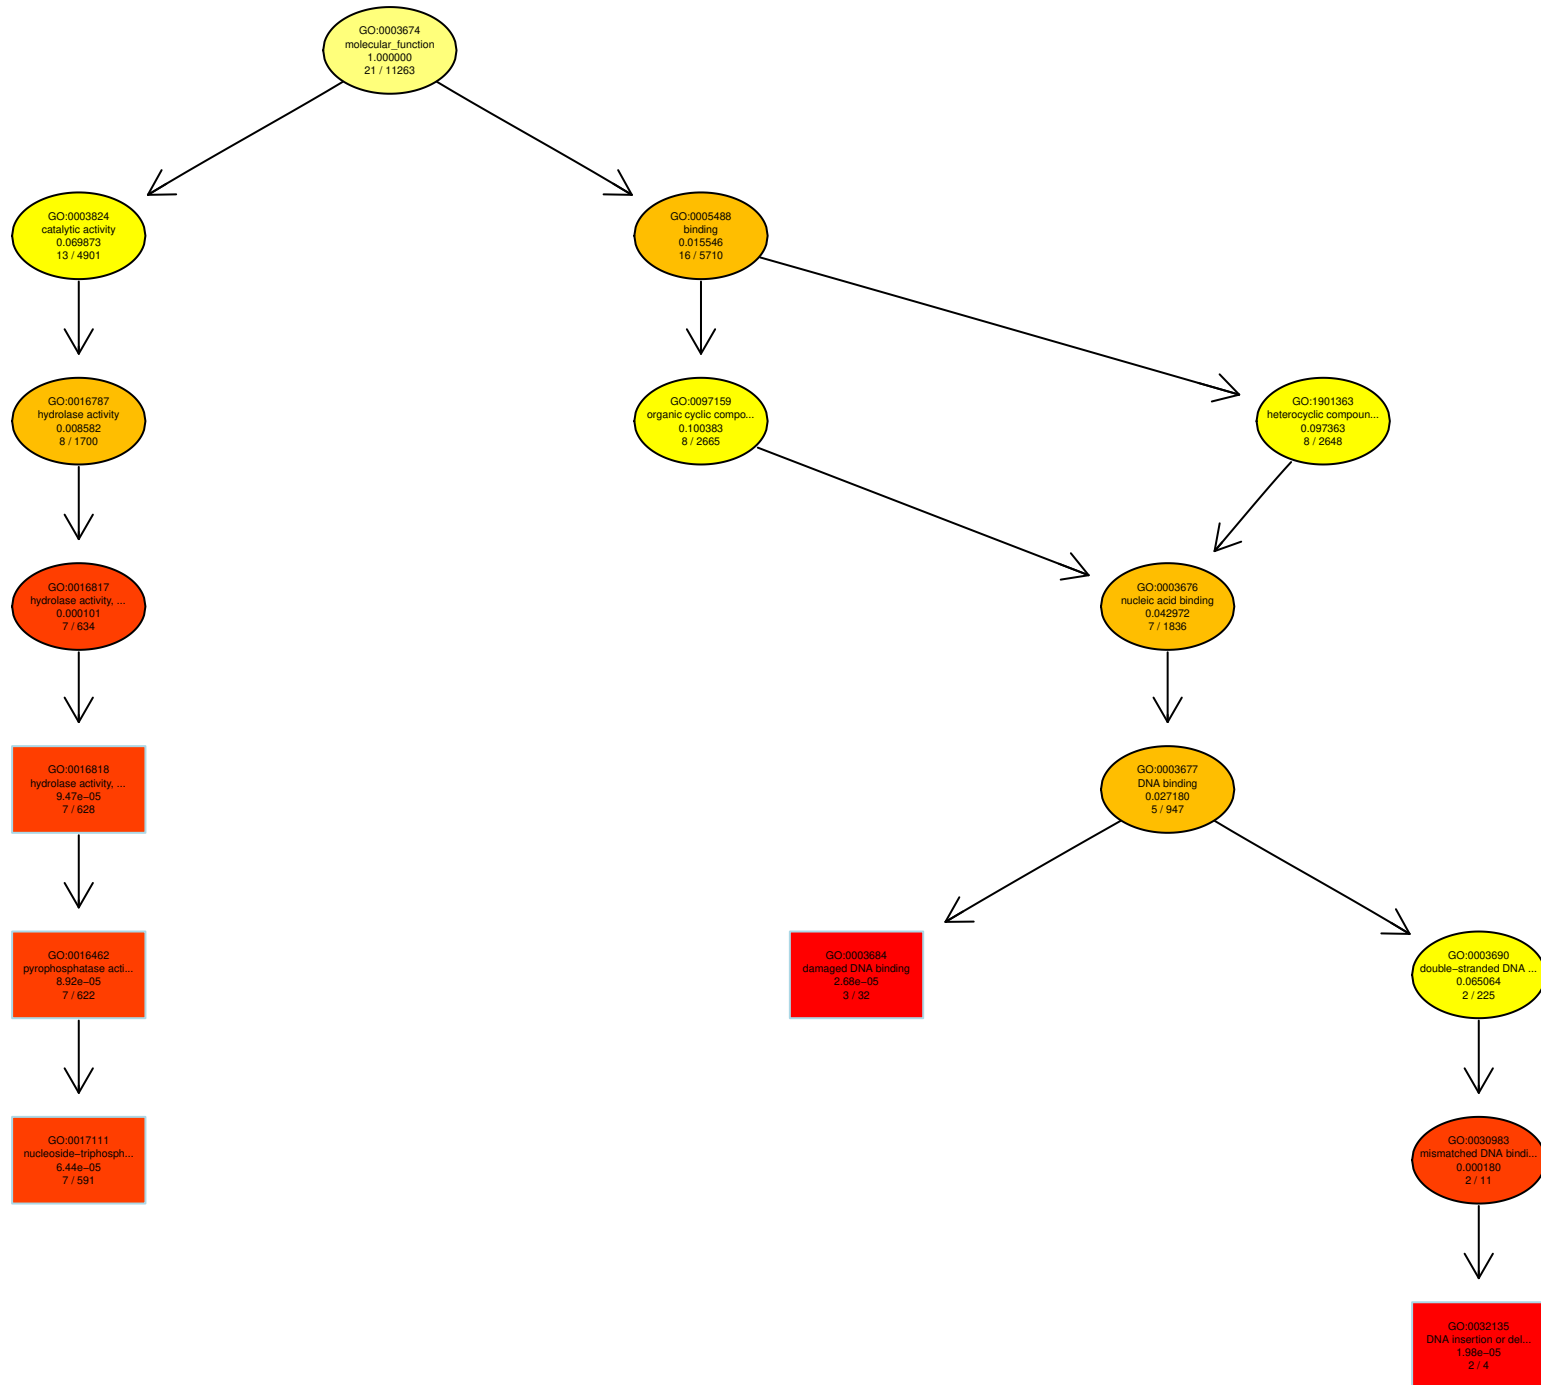

Supplement: PLD3-6-e396-s087.pdf [file PLD3-6-e396-s087.pdf]

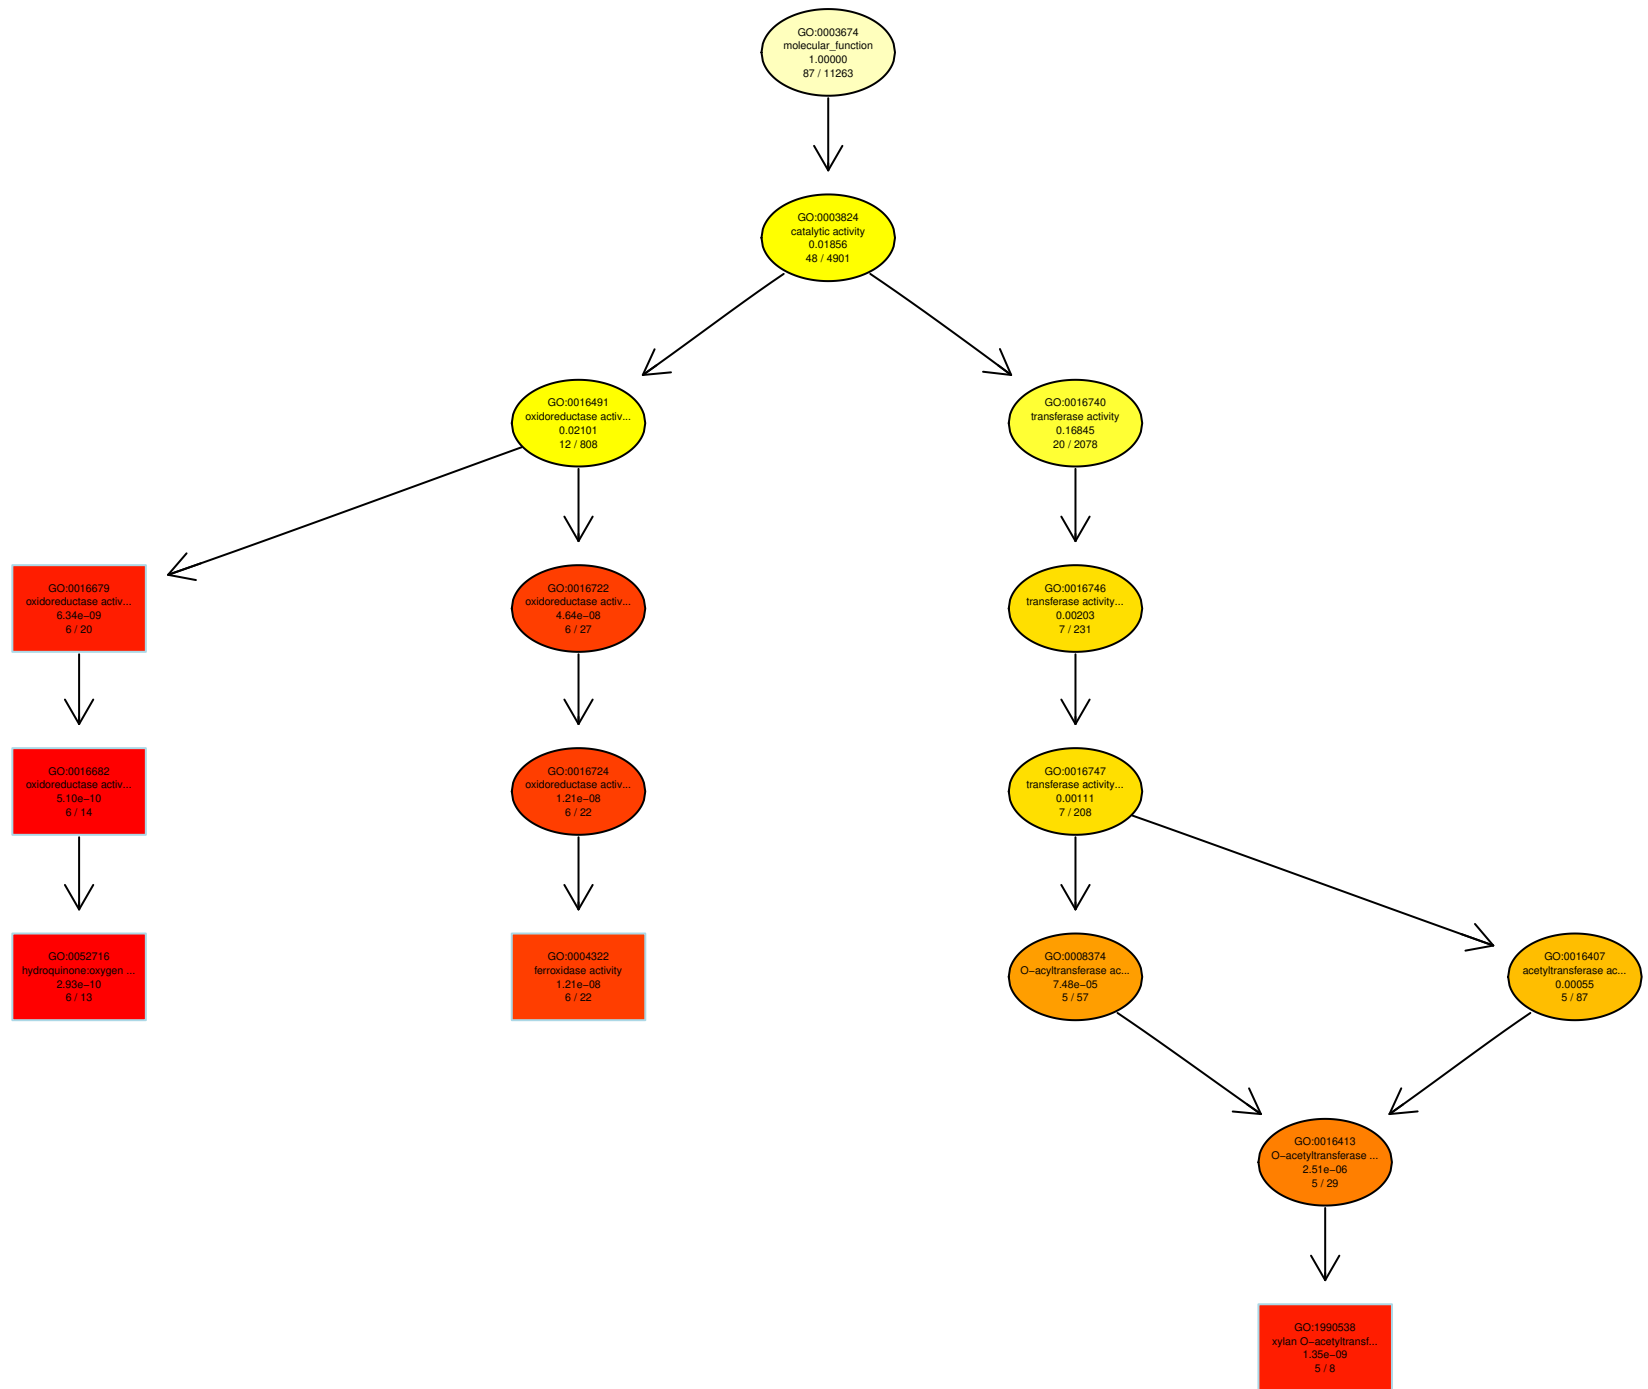

Supplement: PLD3-6-e396-s089.pdf [file PLD3-6-e396-s089.pdf]

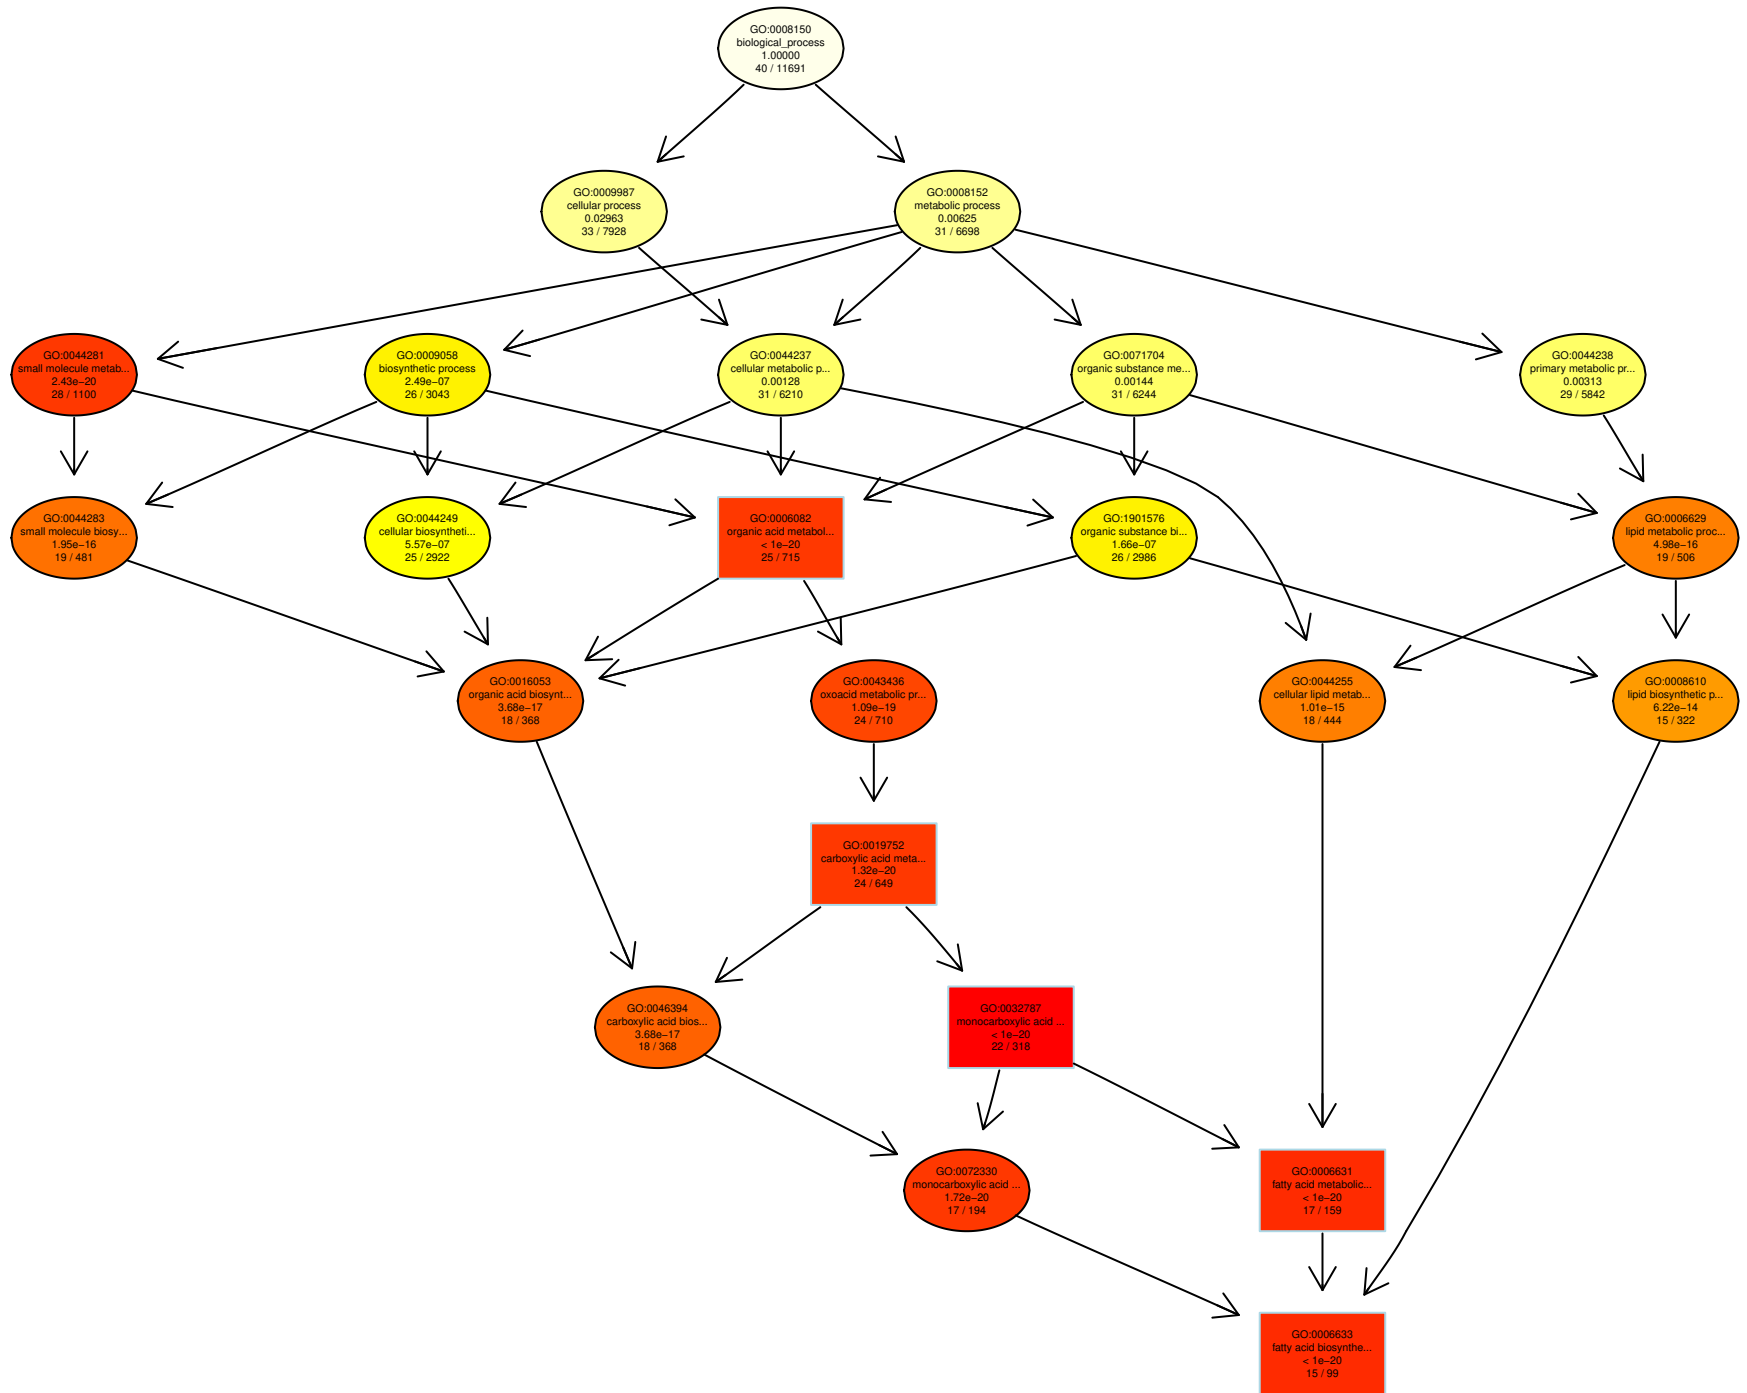

Supplement: PLD3-6-e396-s091.pdf [file PLD3-6-e396-s091.pdf]

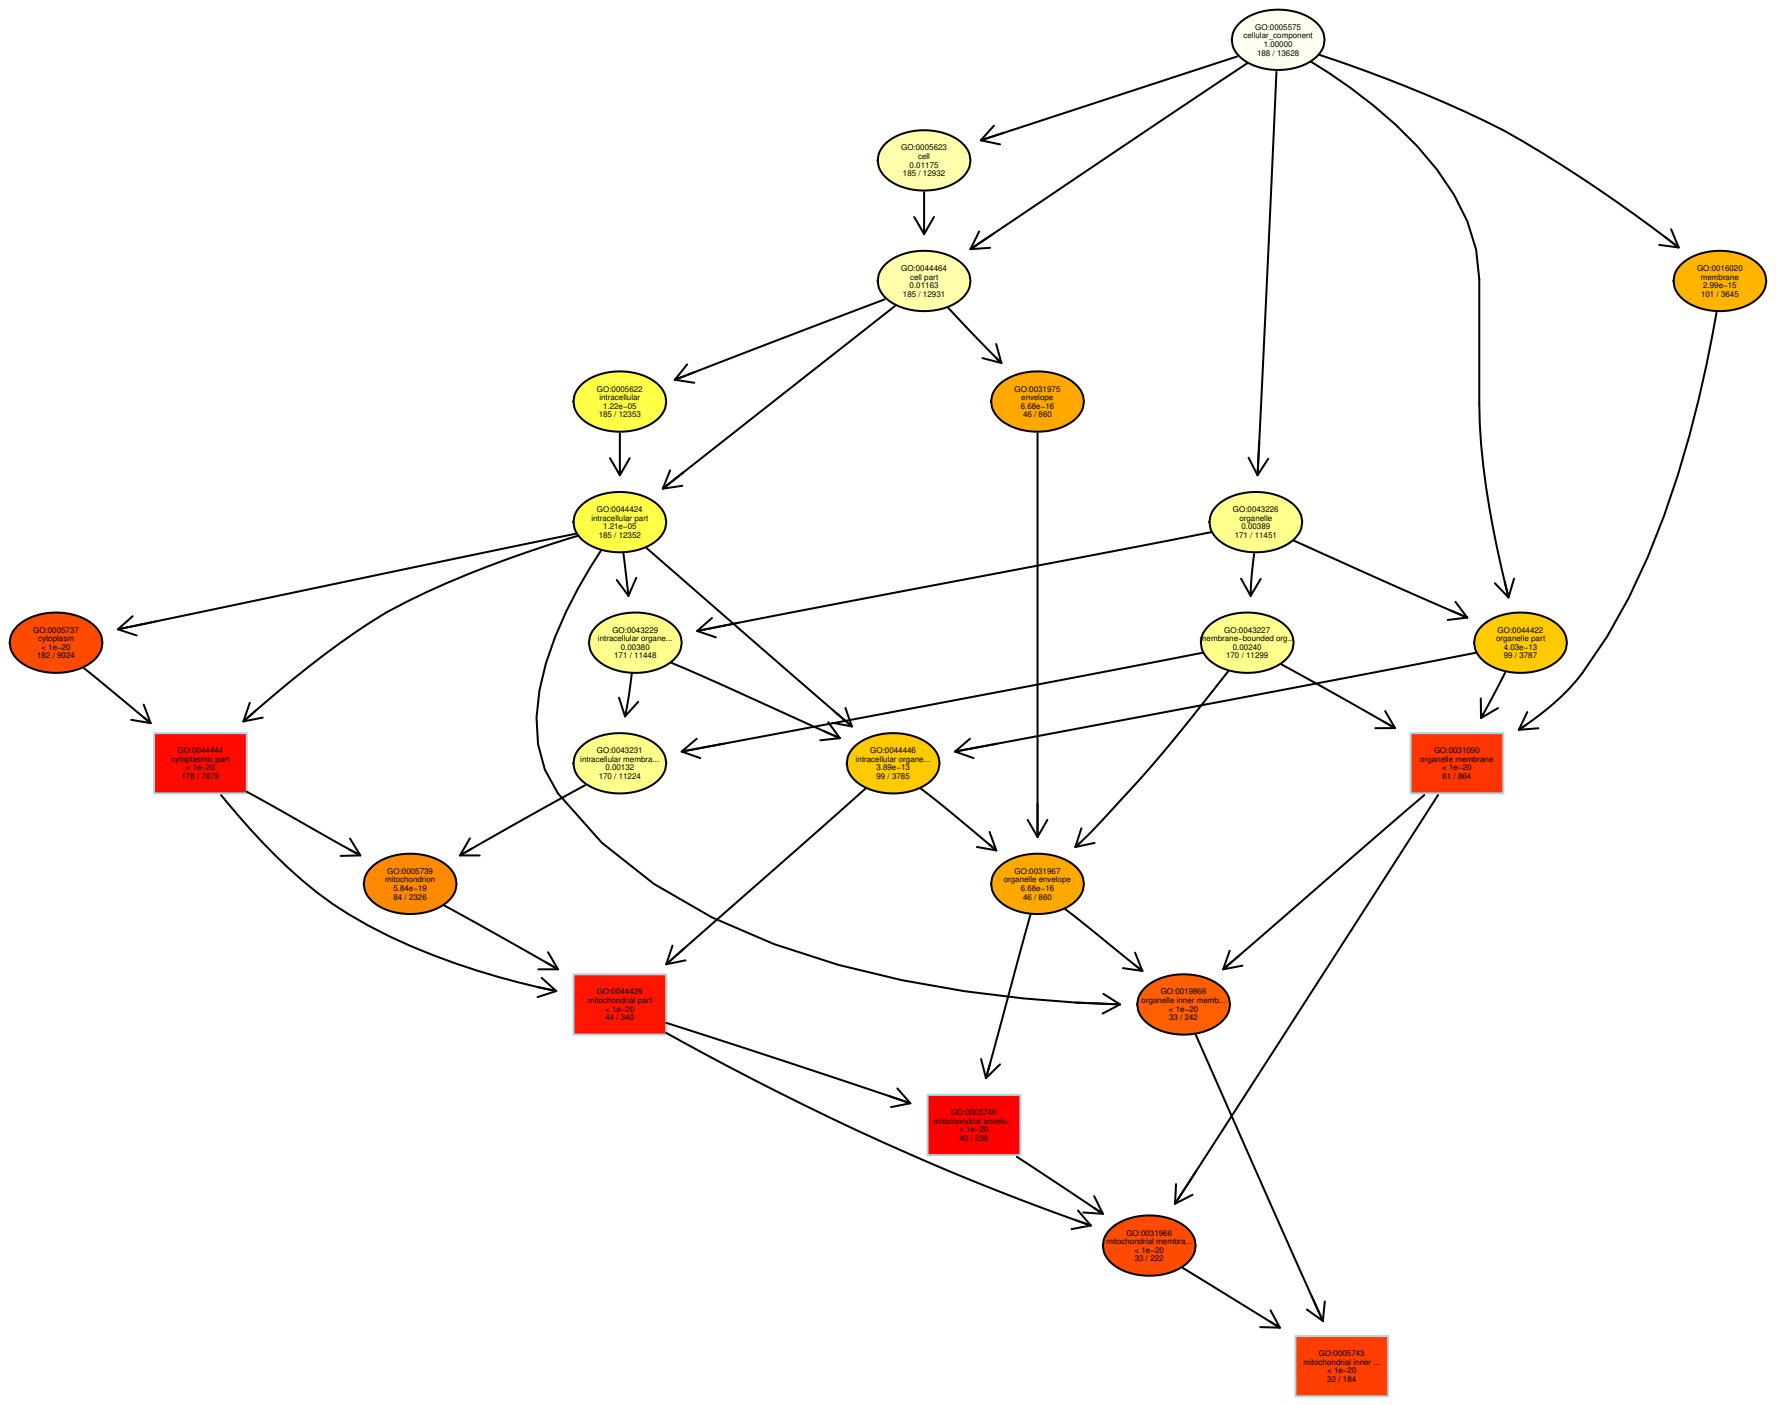

Supplement: PLD3-6-e396-s092.pdf [file PLD3-6-e396-s092.pdf]

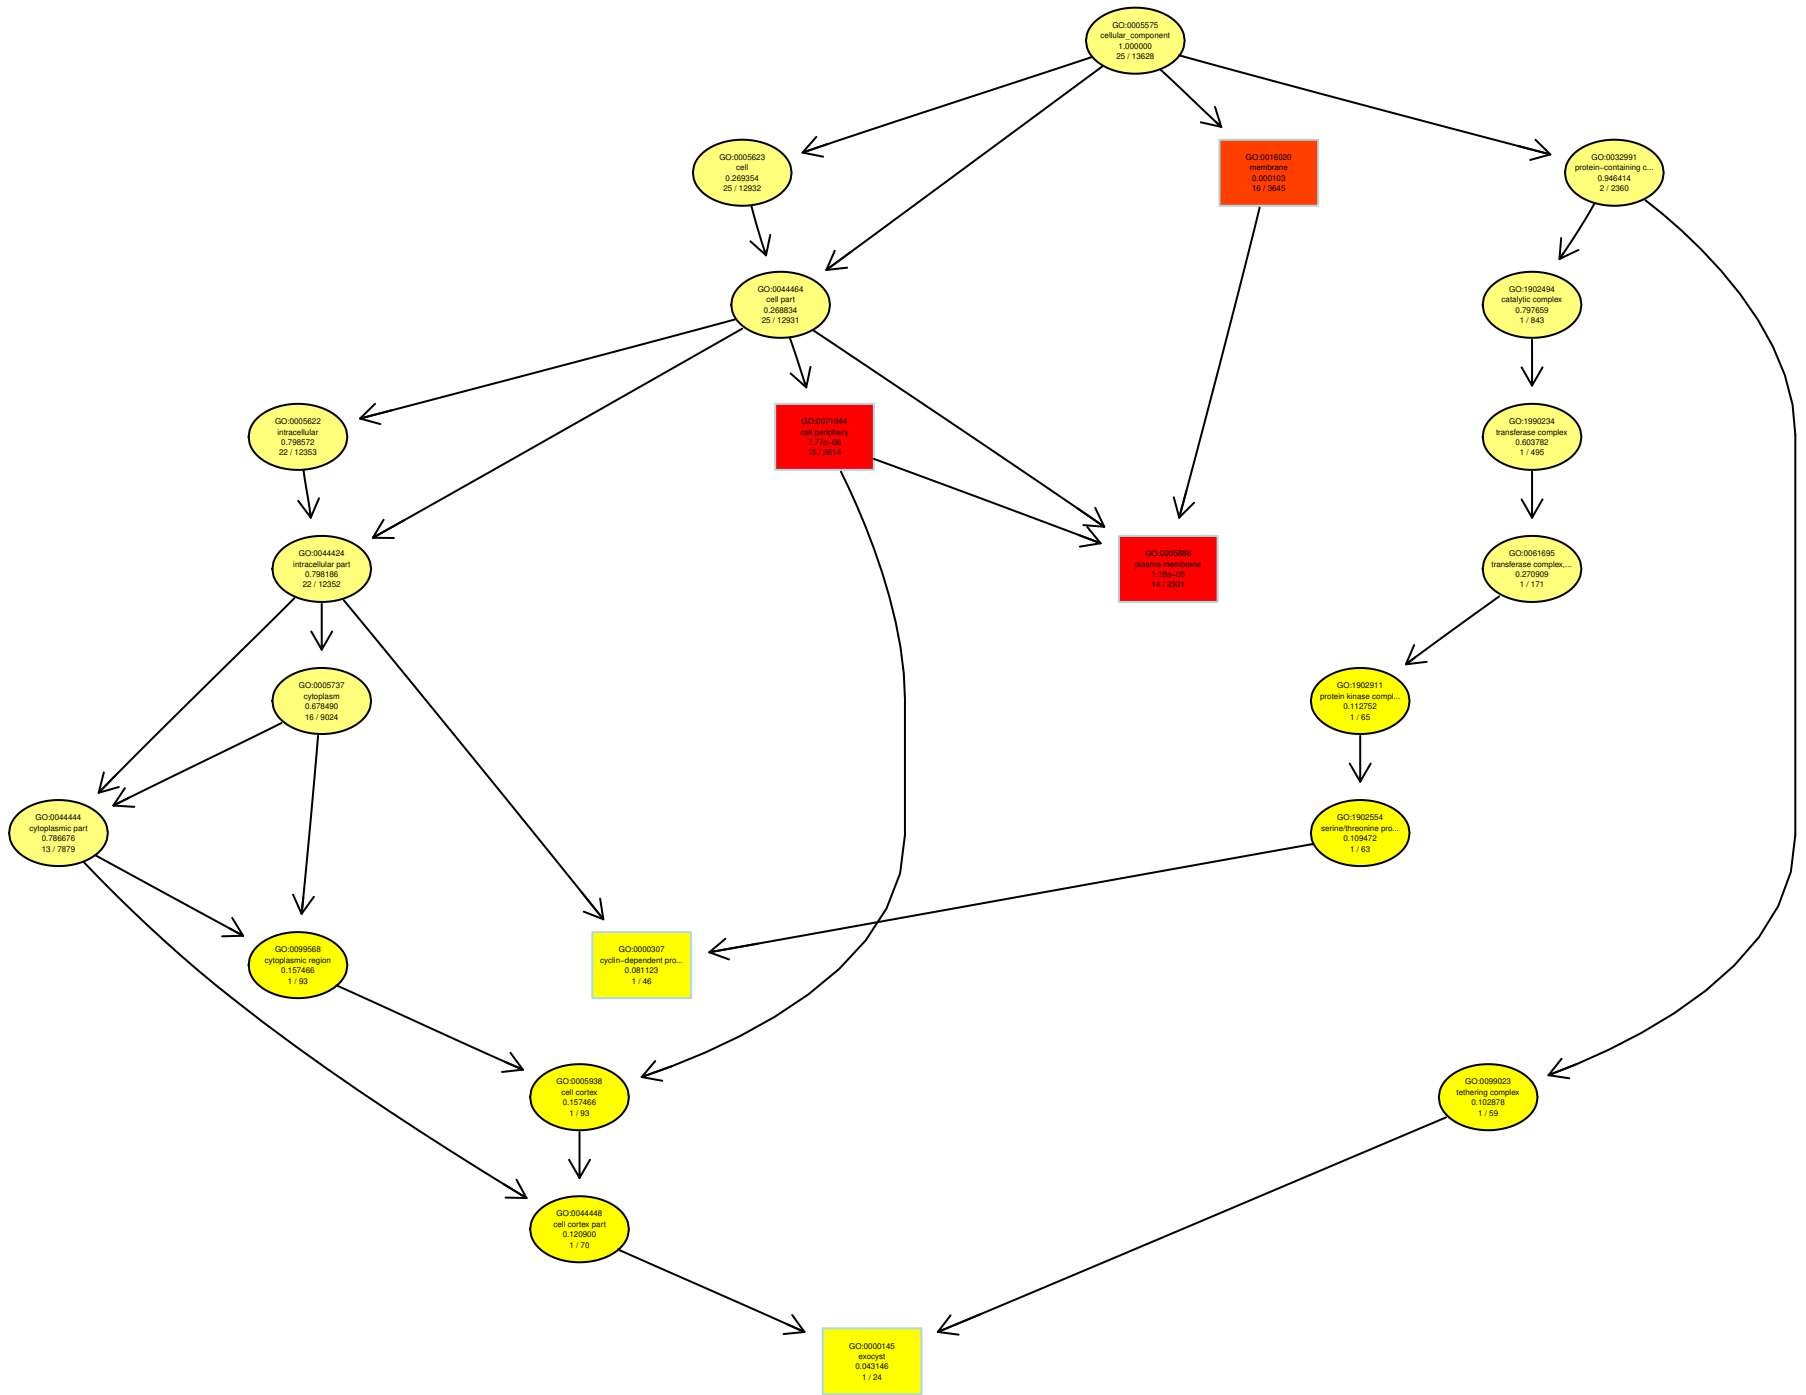

Supplement: PLD3-6-e396-s097.pdf [file PLD3-6-e396-s097.pdf]

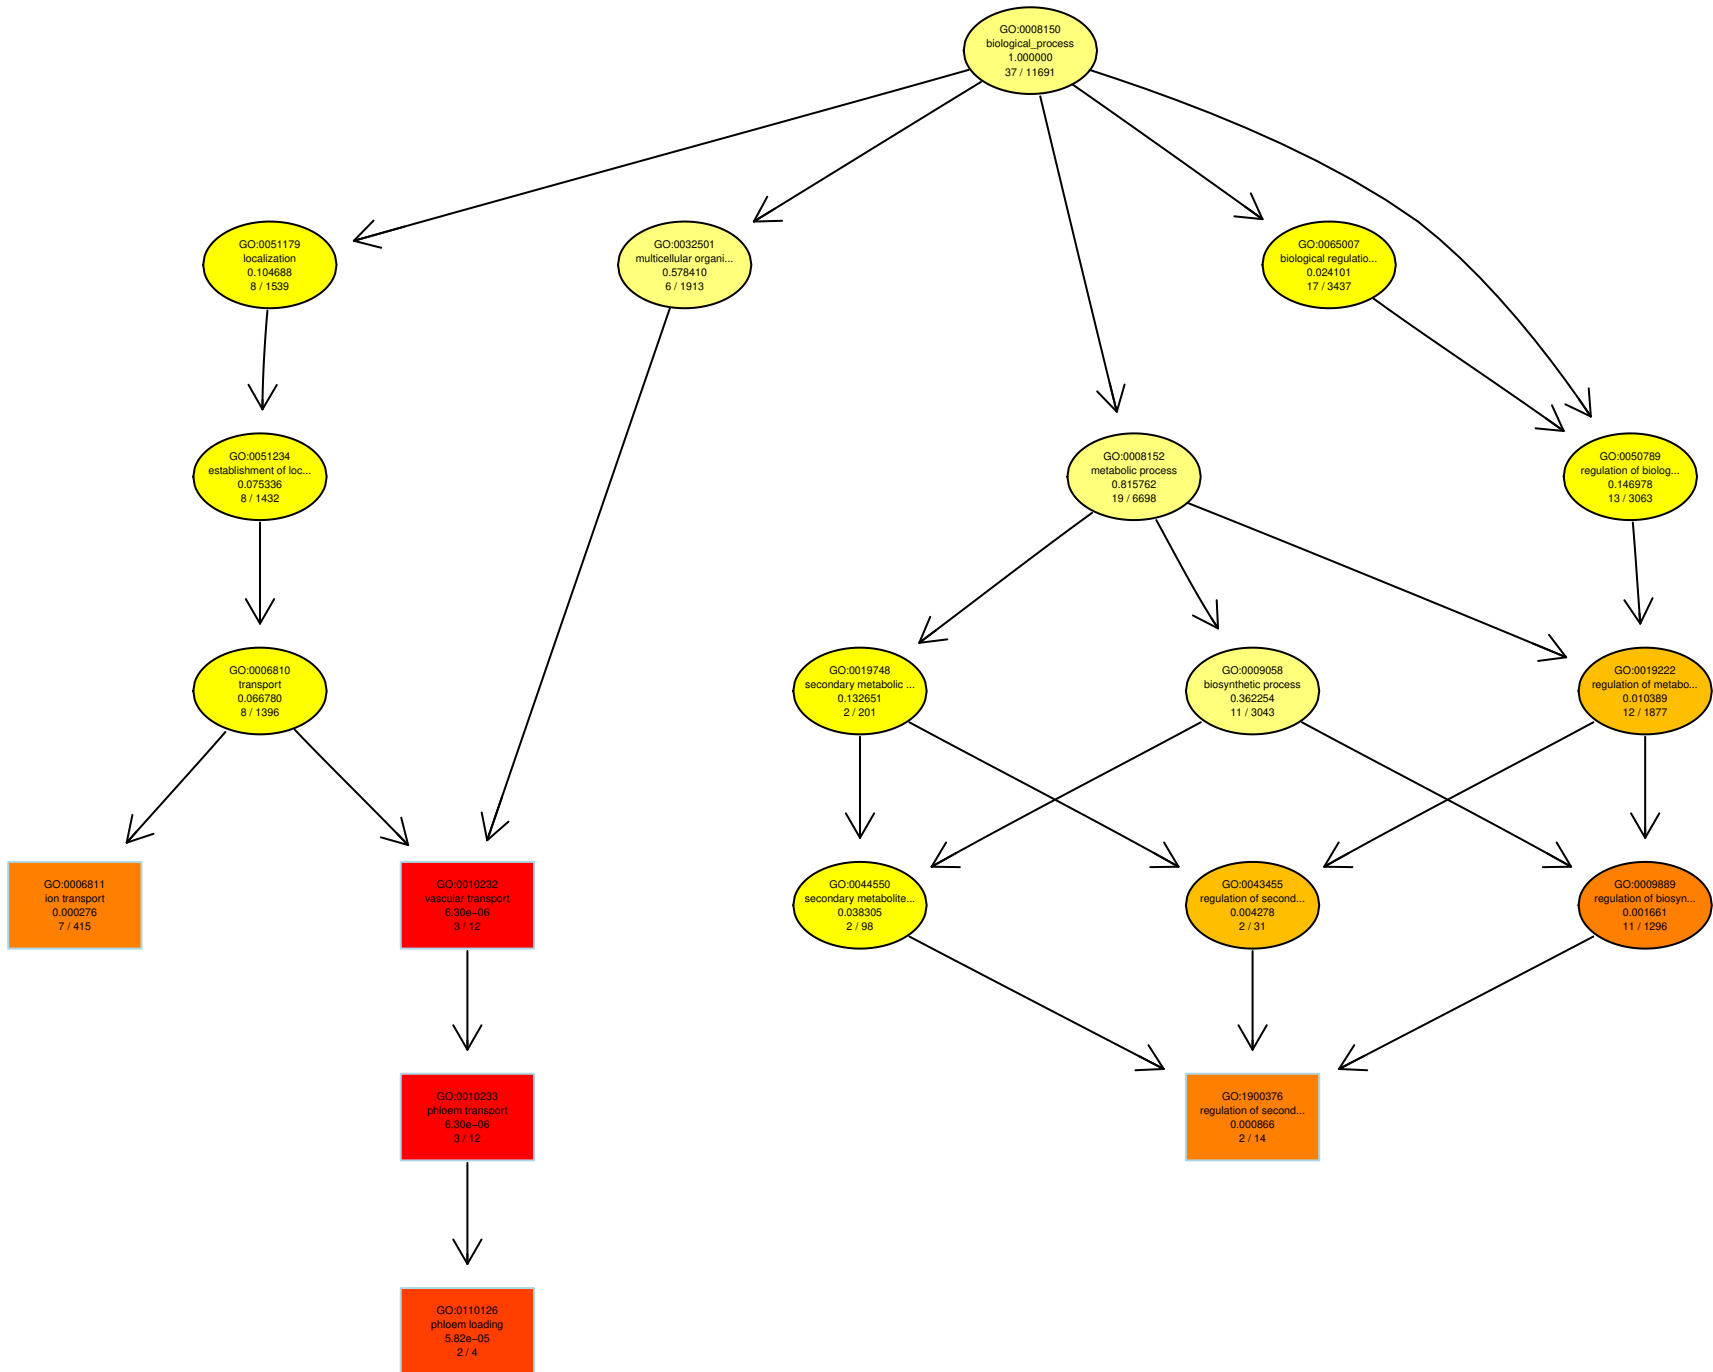

Supplement: PLD3-6-e396-s100.pdf [file PLD3-6-e396-s100.pdf]

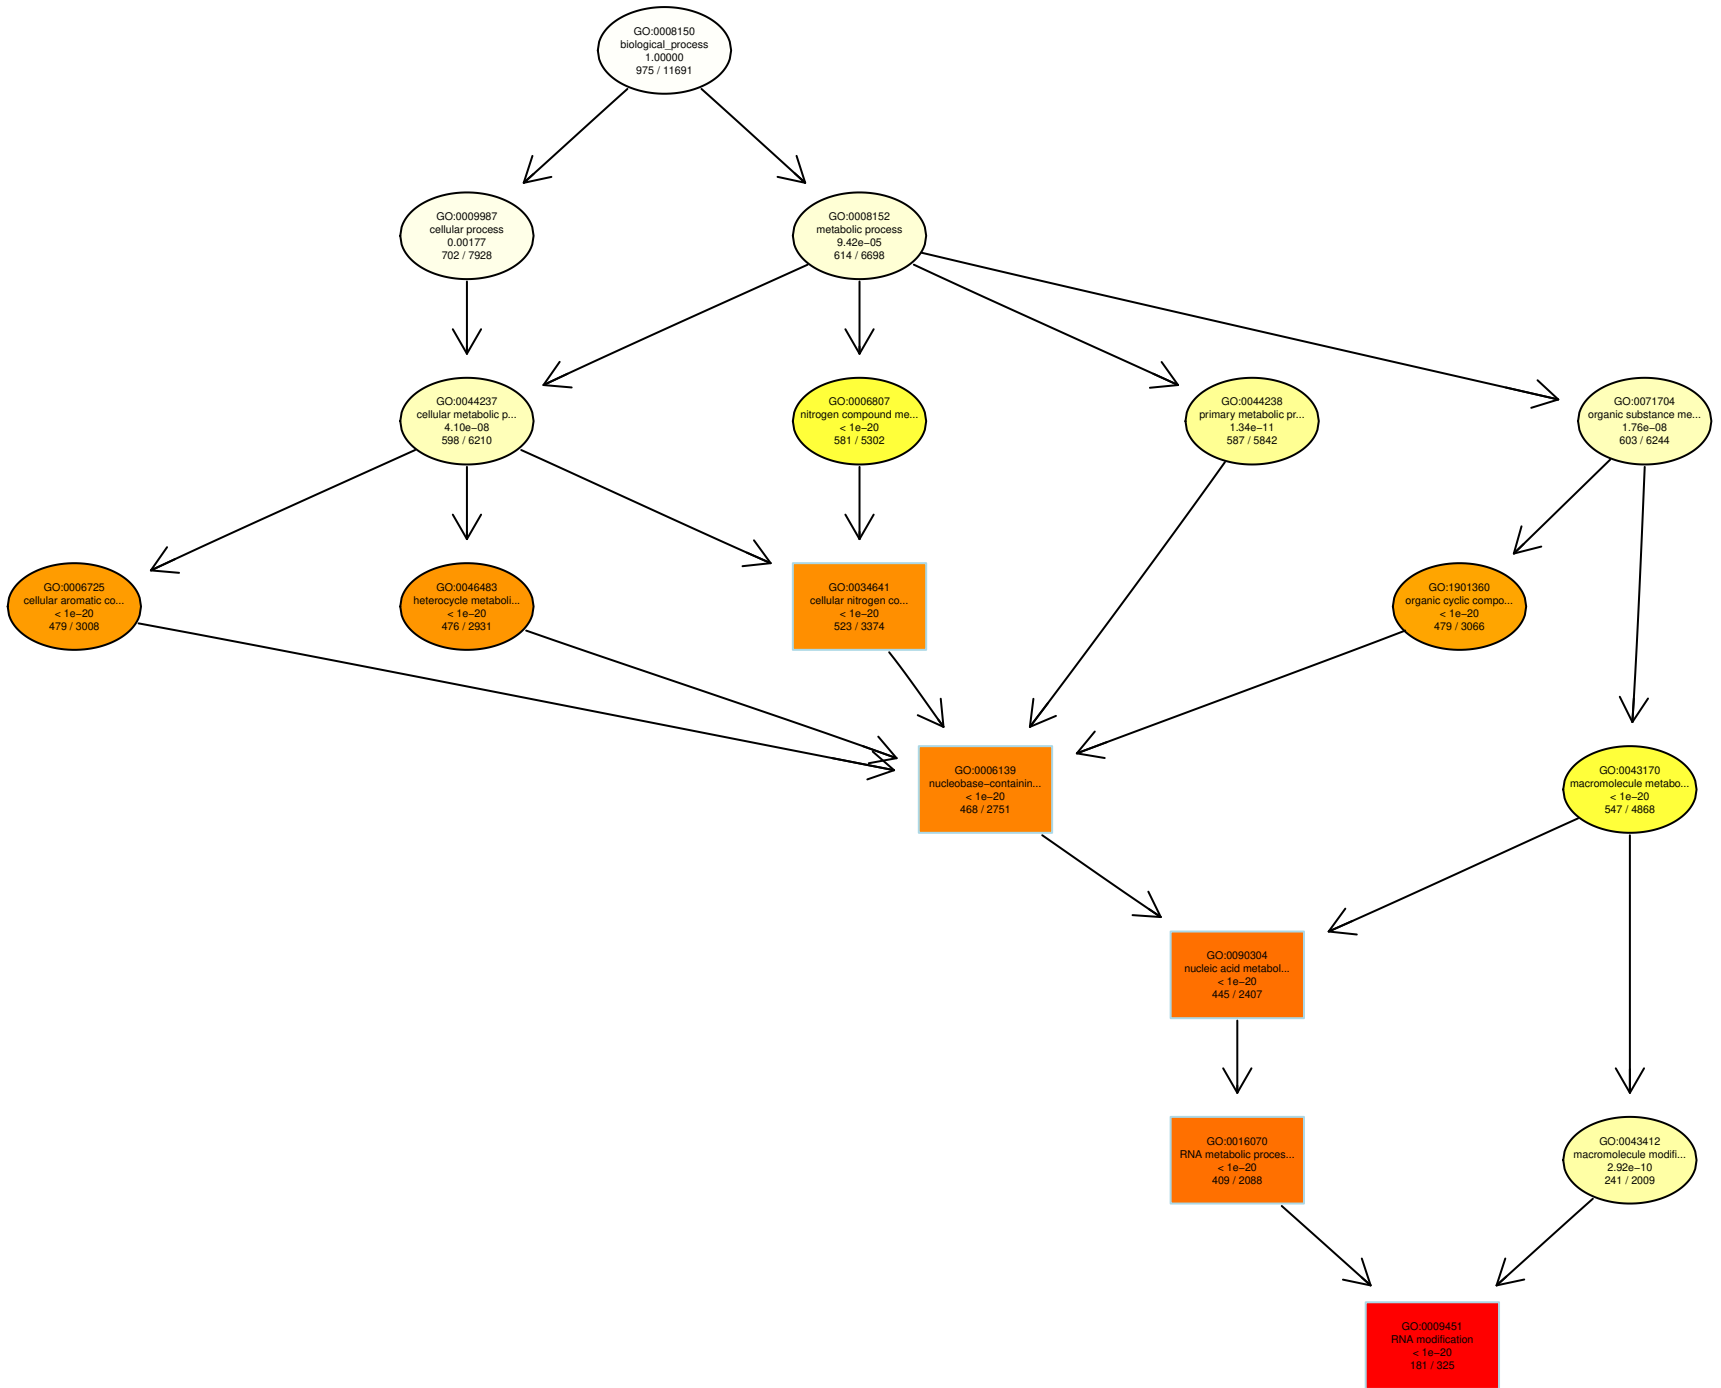

Supplement: PLD3-6-e396-s101.pdf [file PLD3-6-e396-s101.pdf]

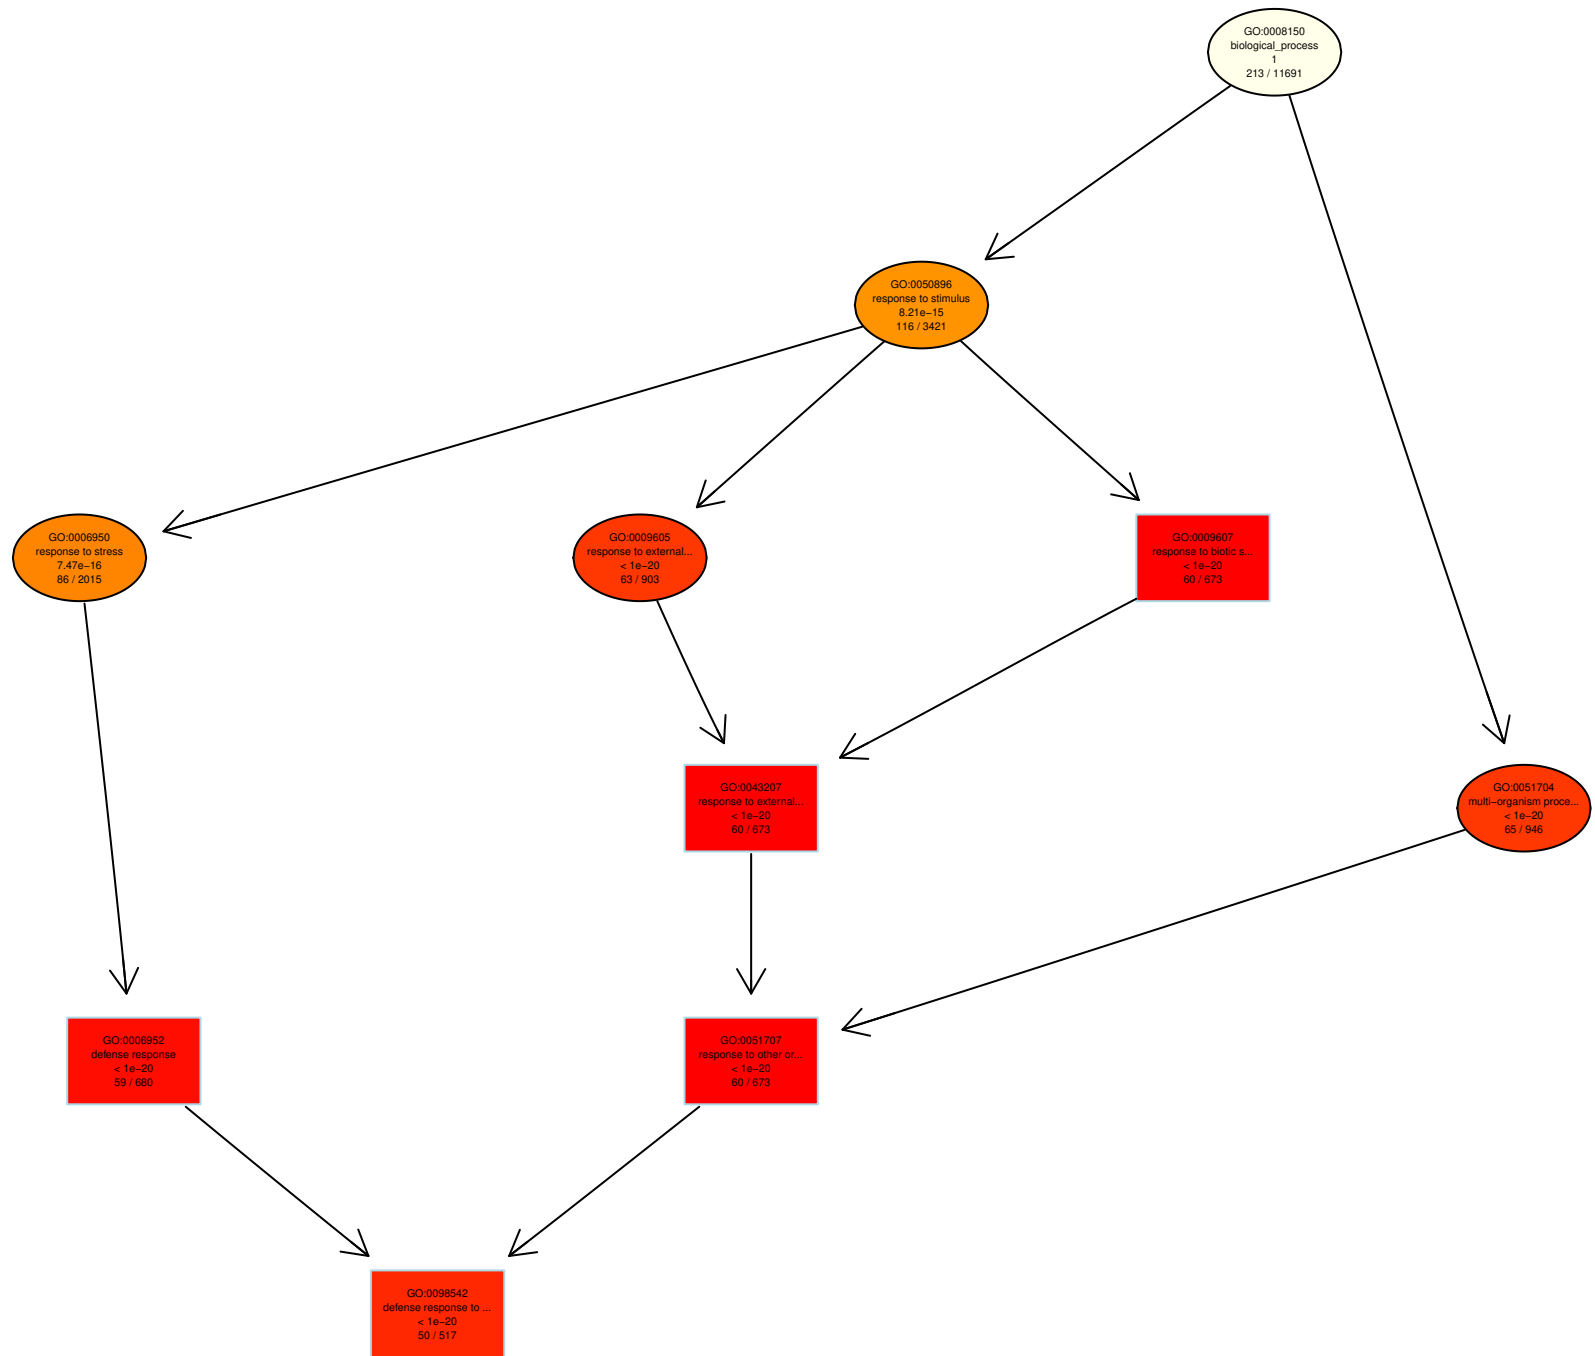

Supplement: PLD3-6-e396-s113.pdf [file PLD3-6-e396-s113.pdf]

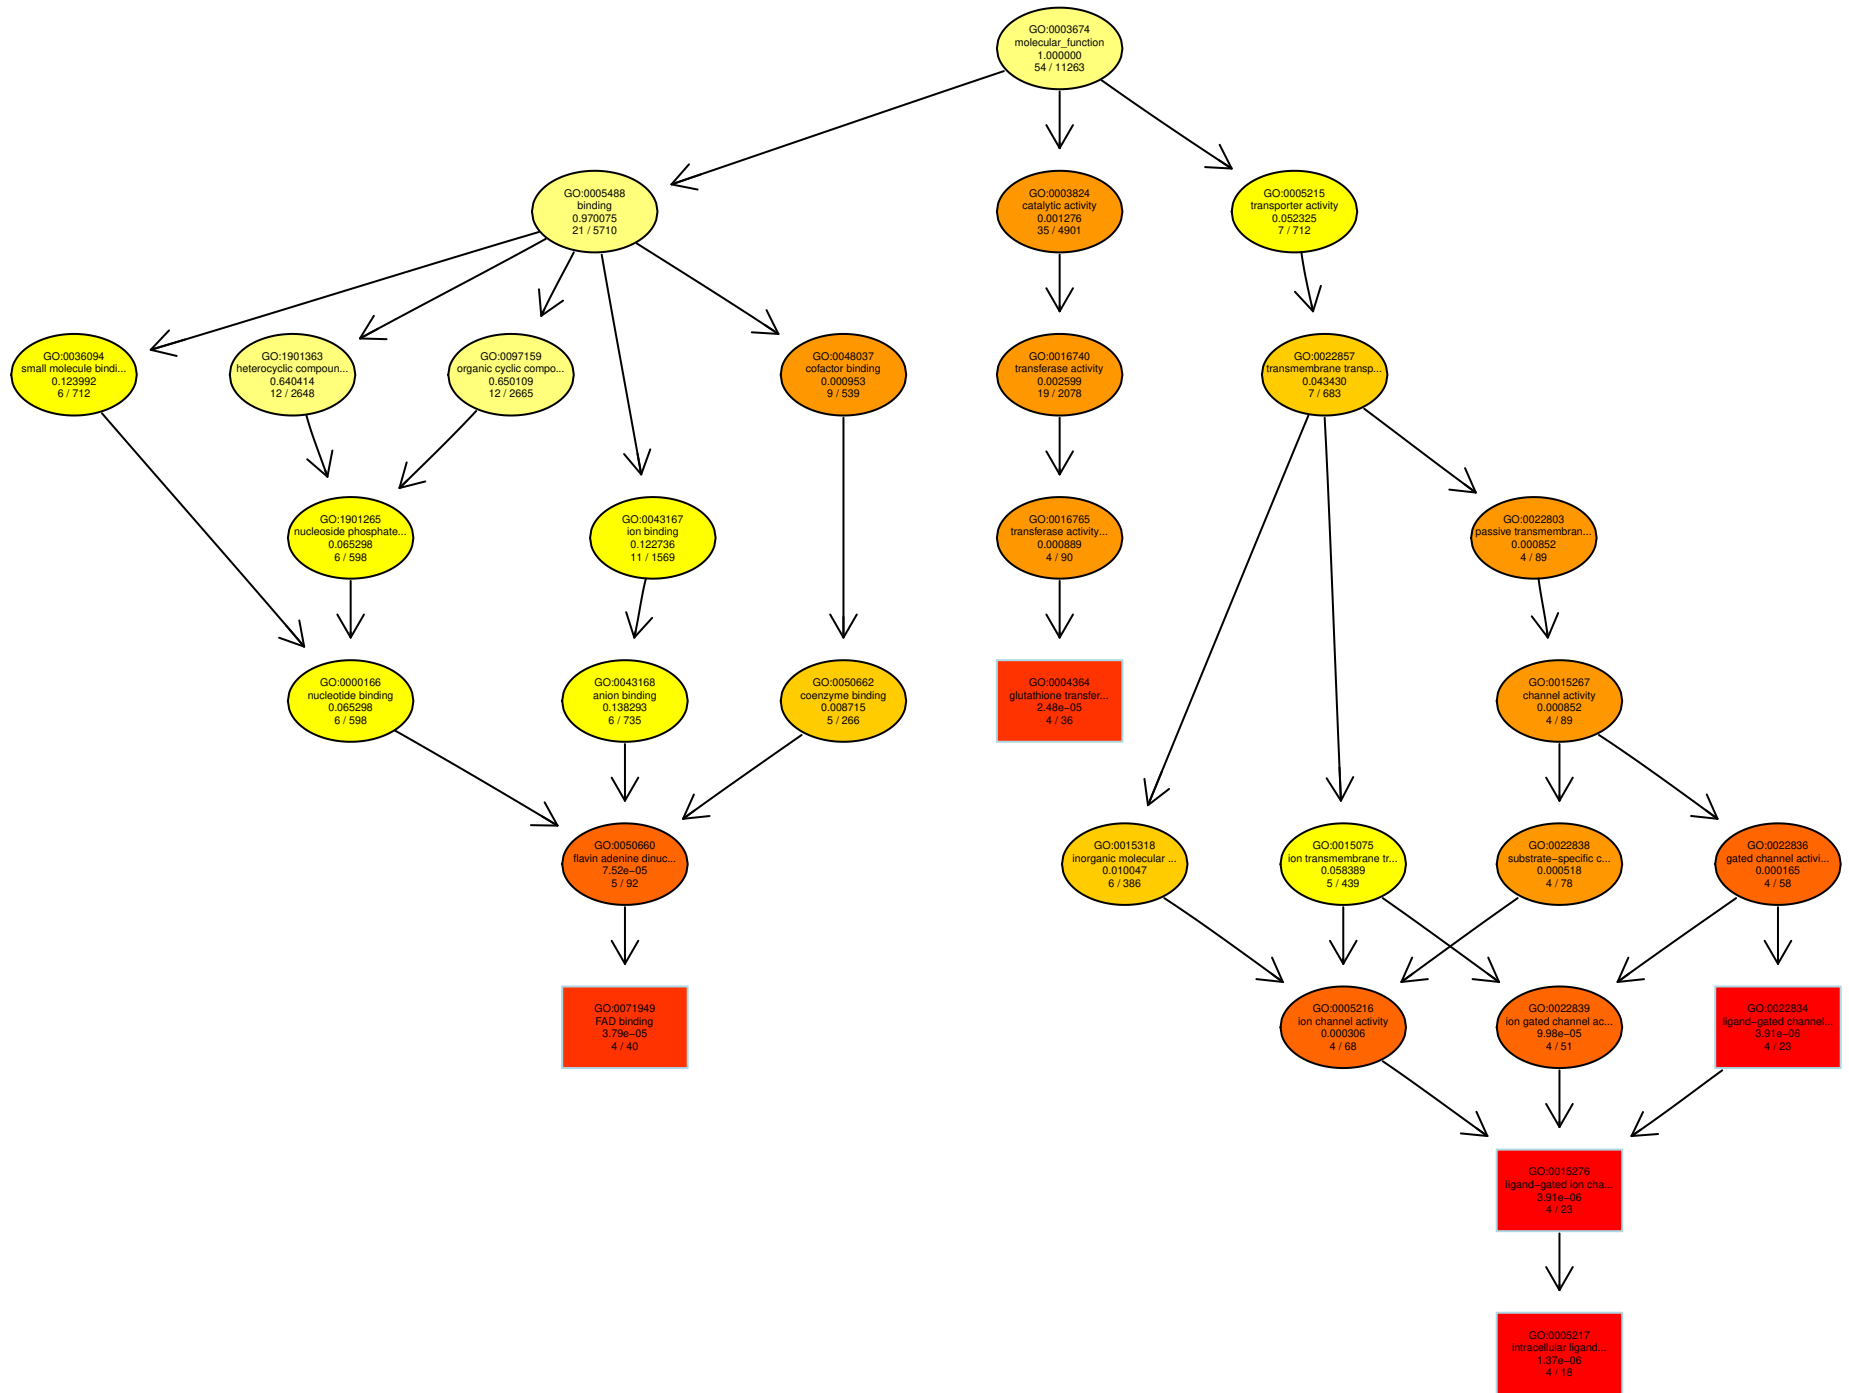

Supplement: PLD3-6-e396-s114.pdf [file PLD3-6-e396-s114.pdf]

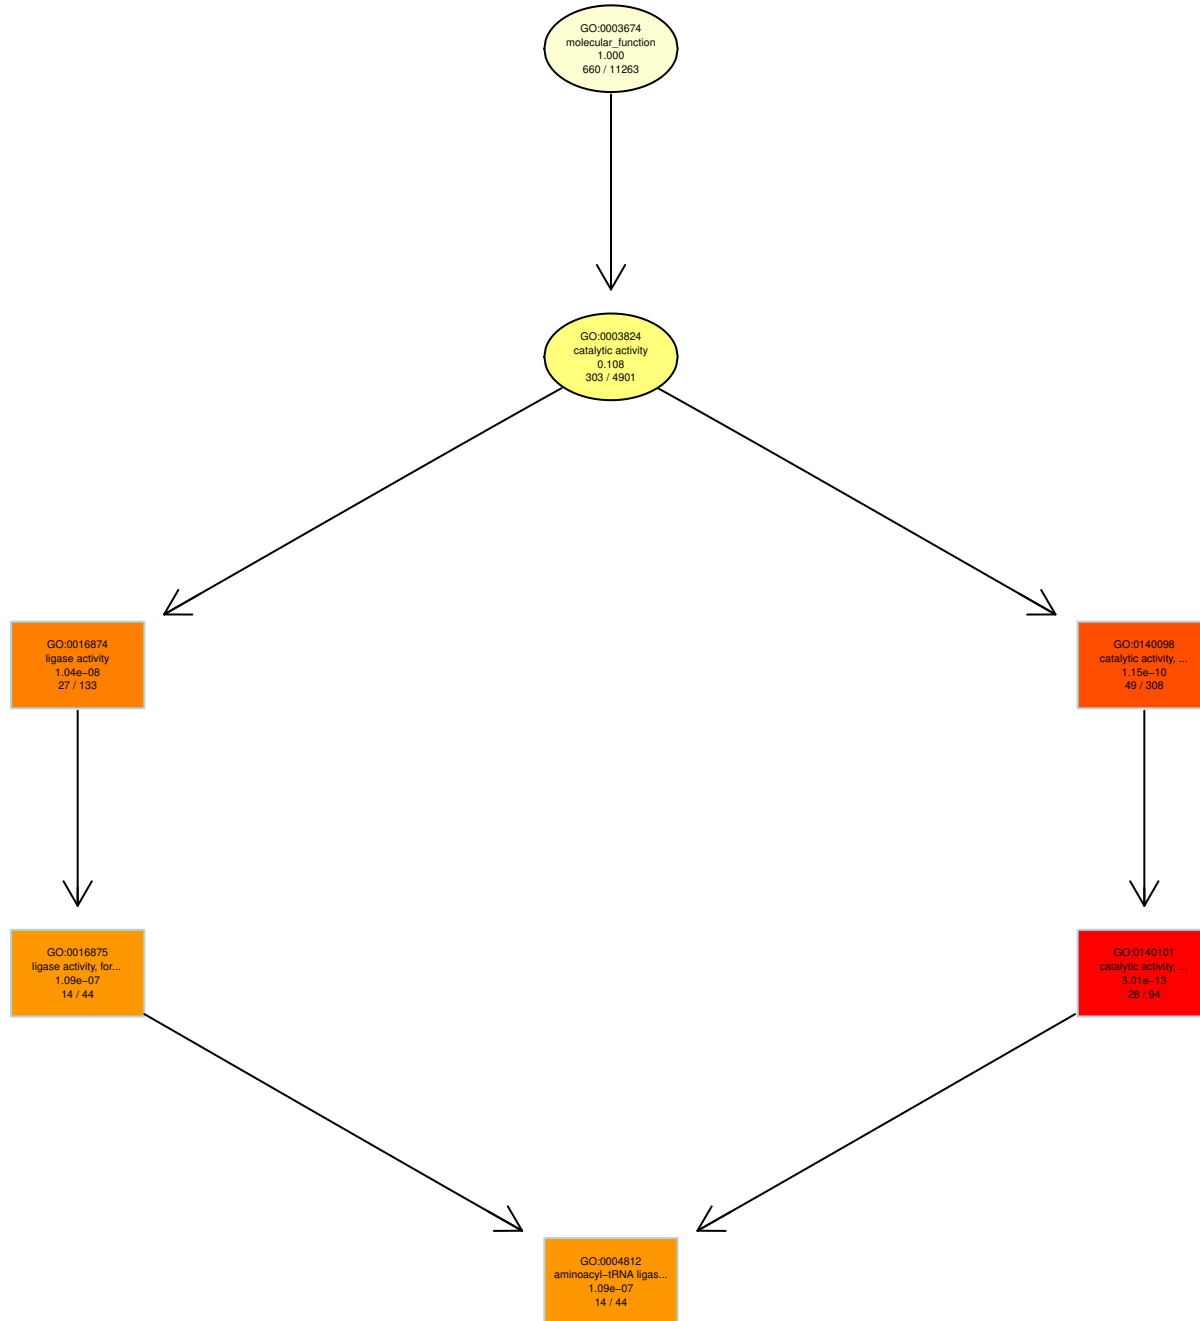

Supplement: PLD3-6-e396-s118.pdf [file PLD3-6-e396-s118.pdf]

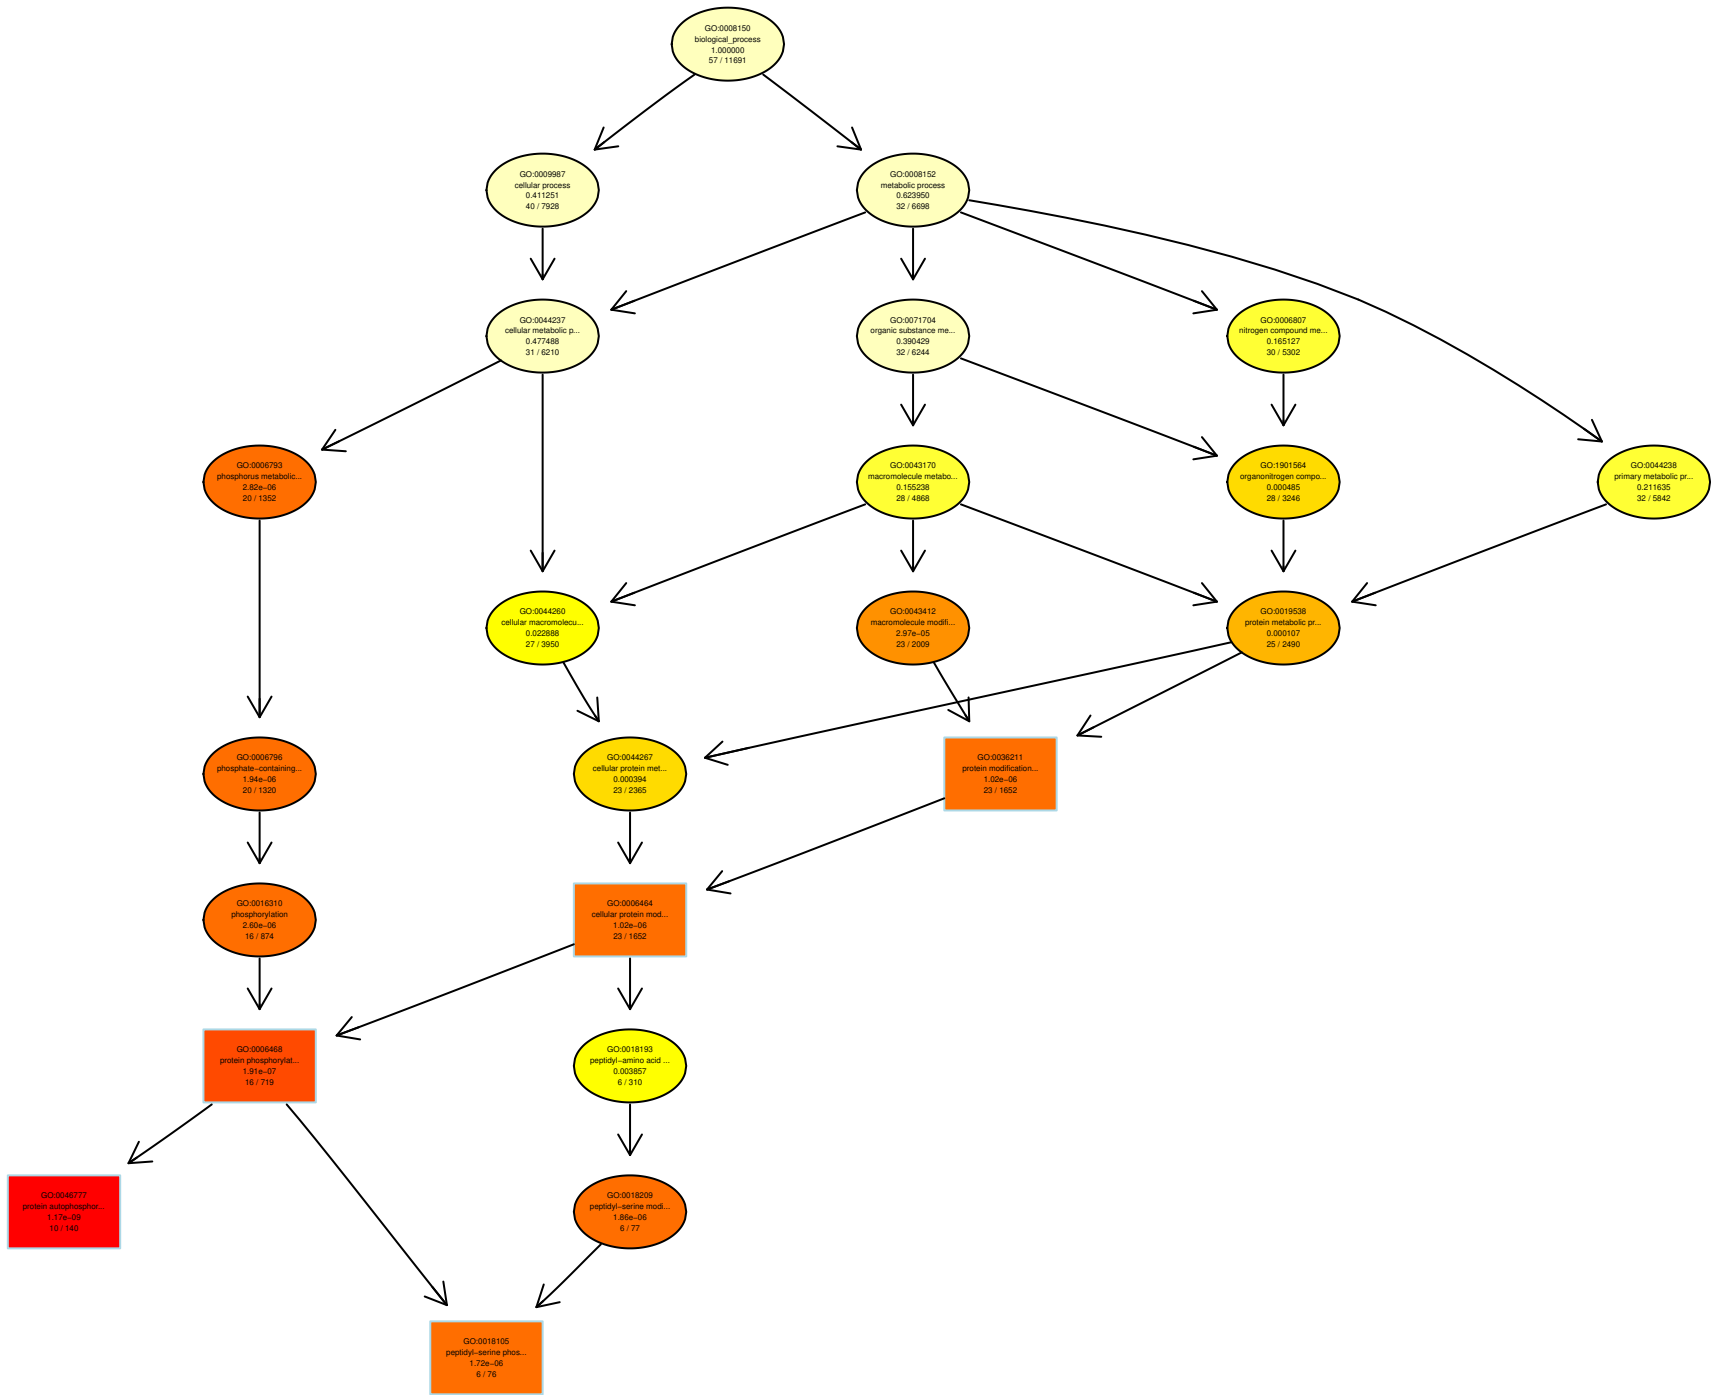

Supplement: PLD3-6-e396-s120.pdf [file PLD3-6-e396-s120.pdf]

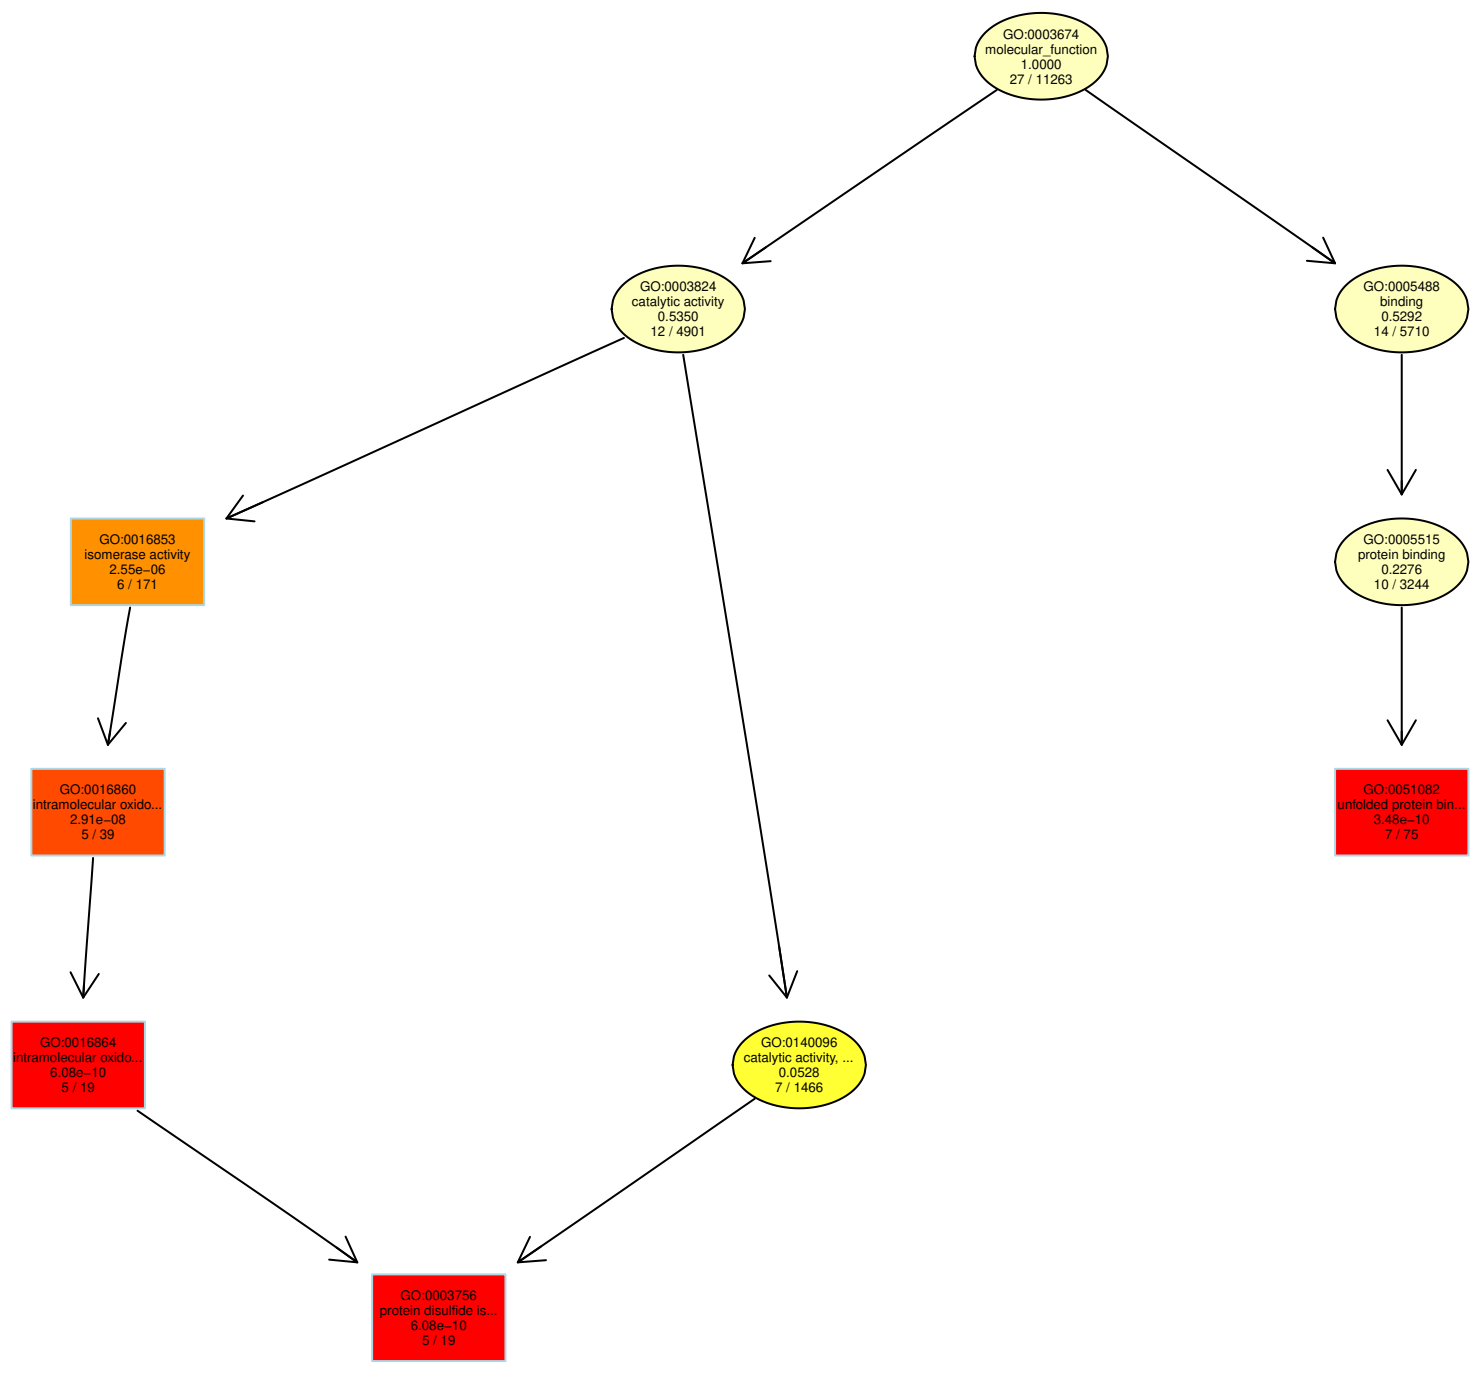

Supplement: PLD3-6-e396-s123.pdf [file PLD3-6-e396-s123.pdf]

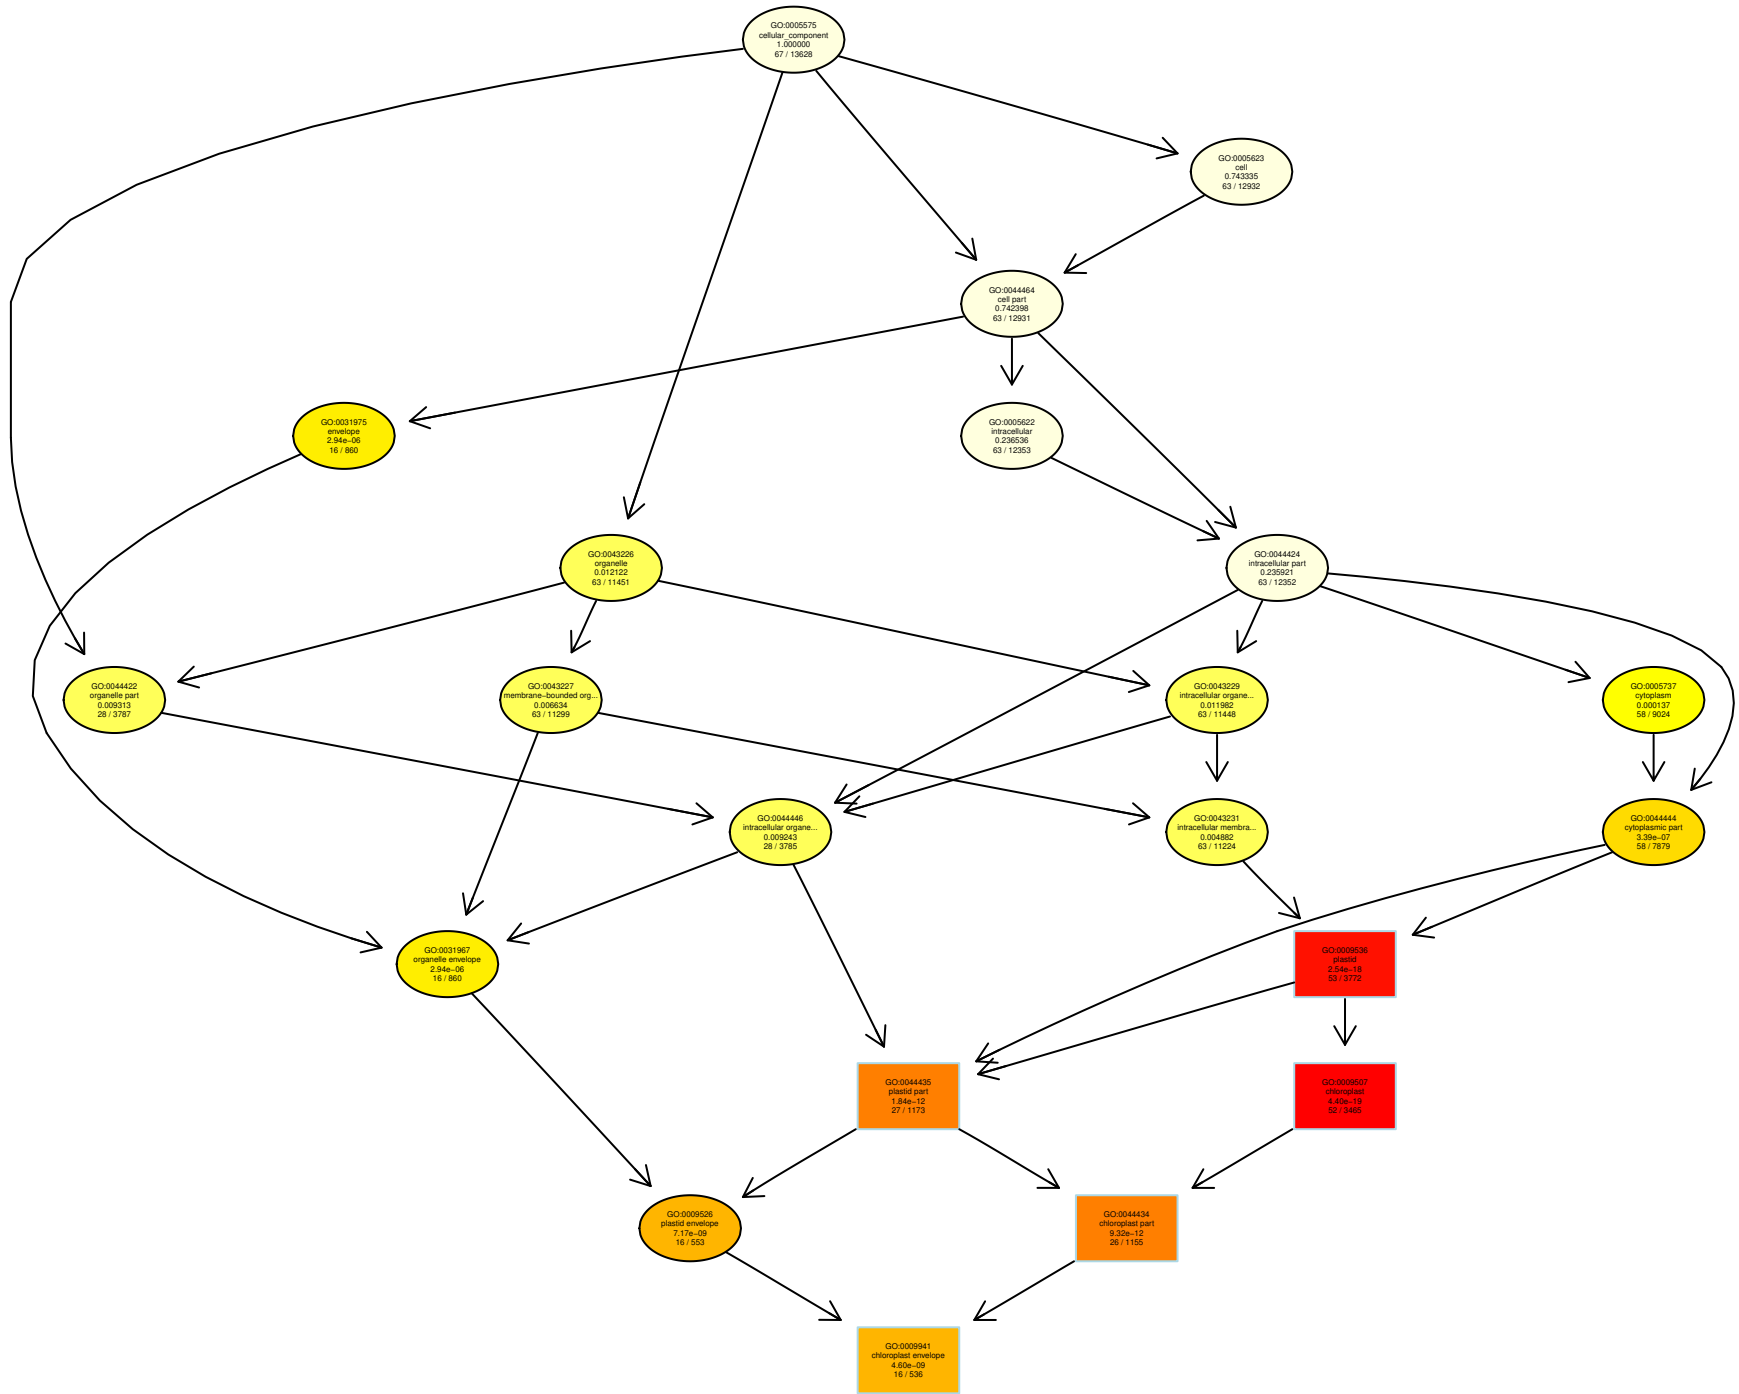

Supplement: PLD3-6-e396-s126.pdf [file PLD3-6-e396-s126.pdf]

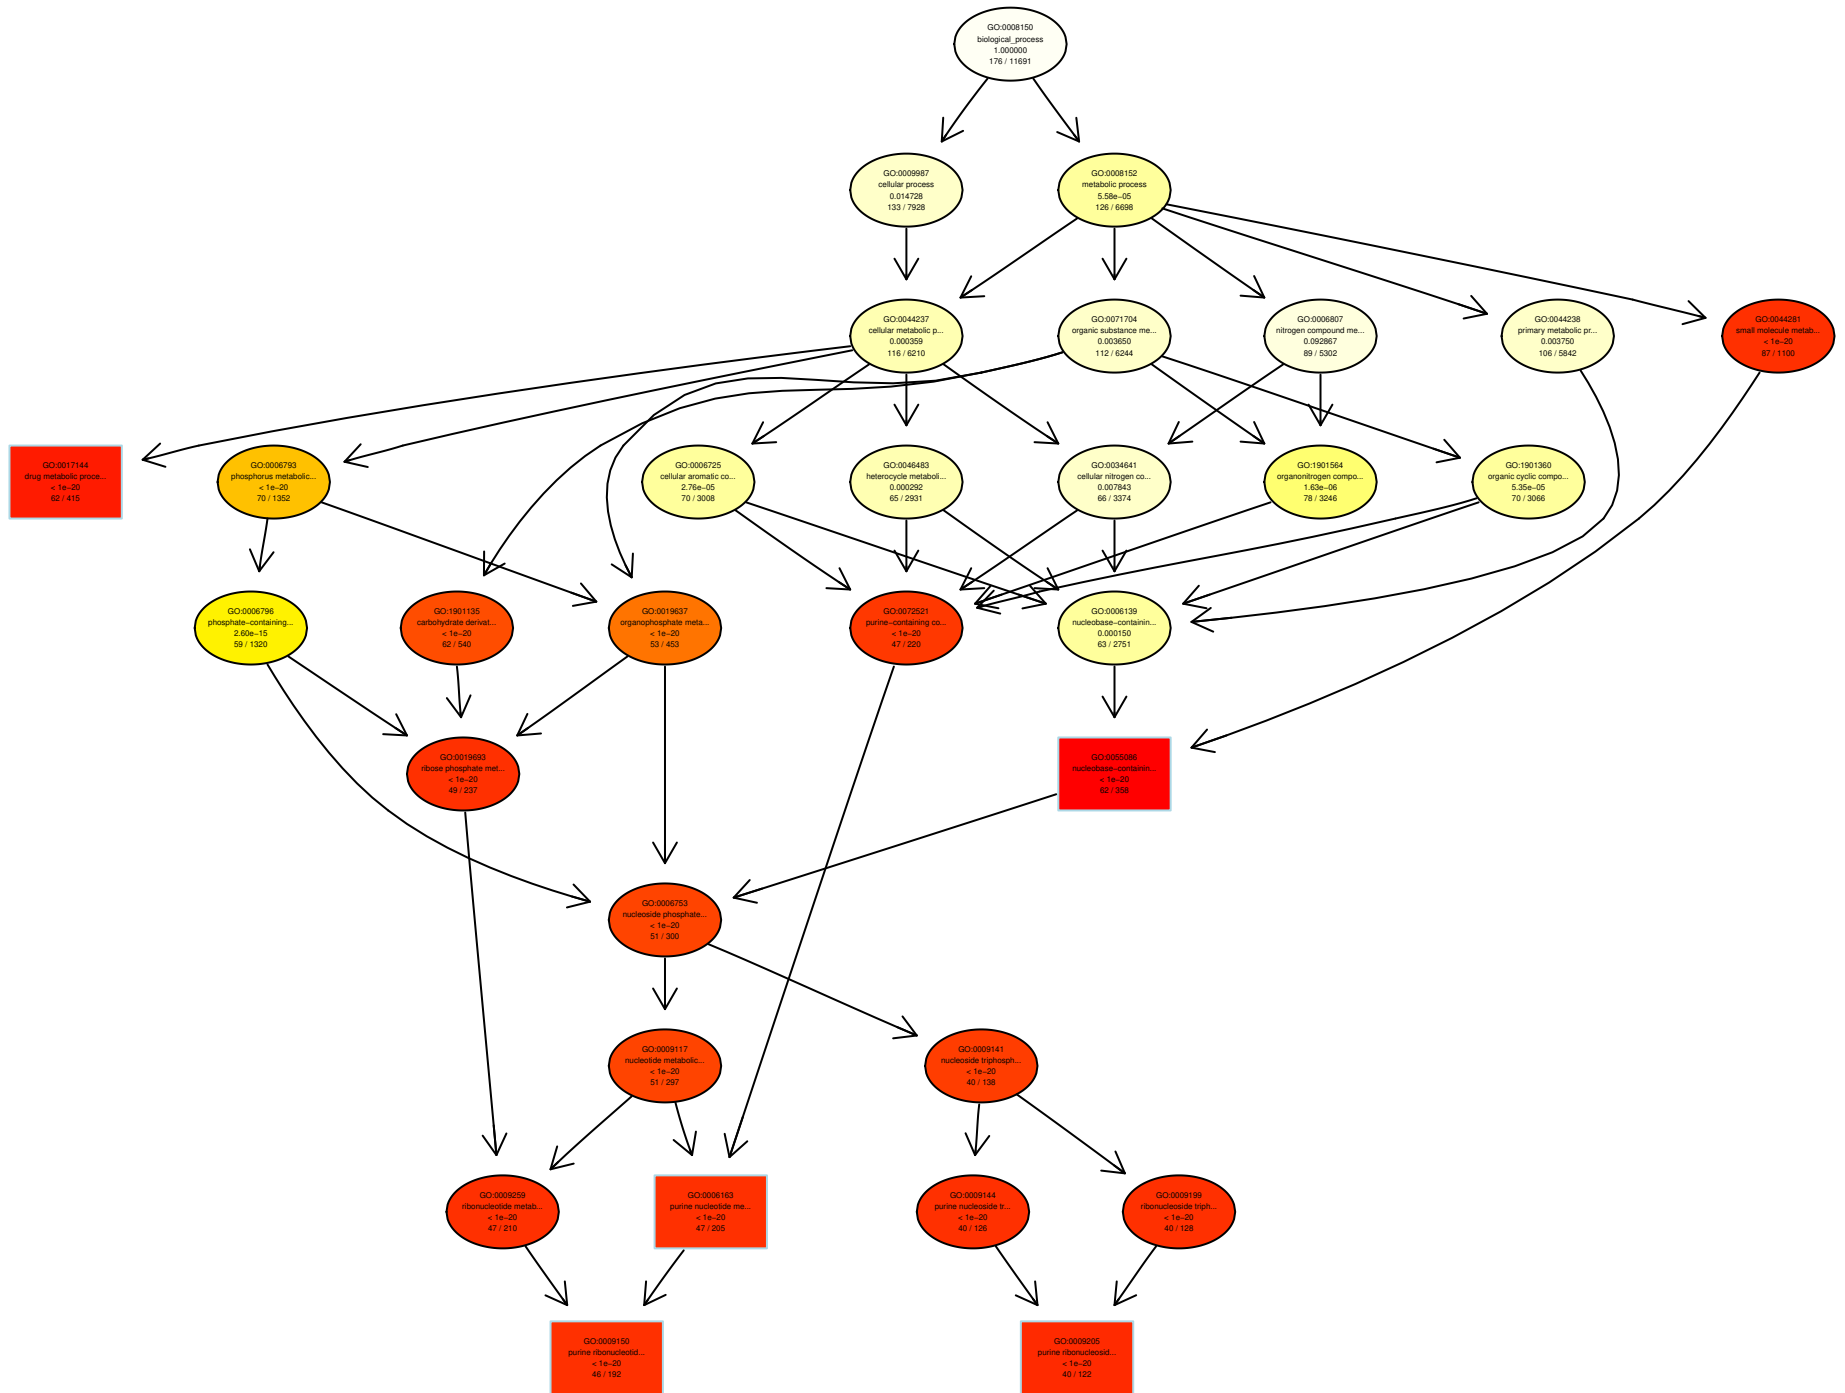

Supplement: PLD3-6-e396-s128.pdf [file PLD3-6-e396-s128.pdf]

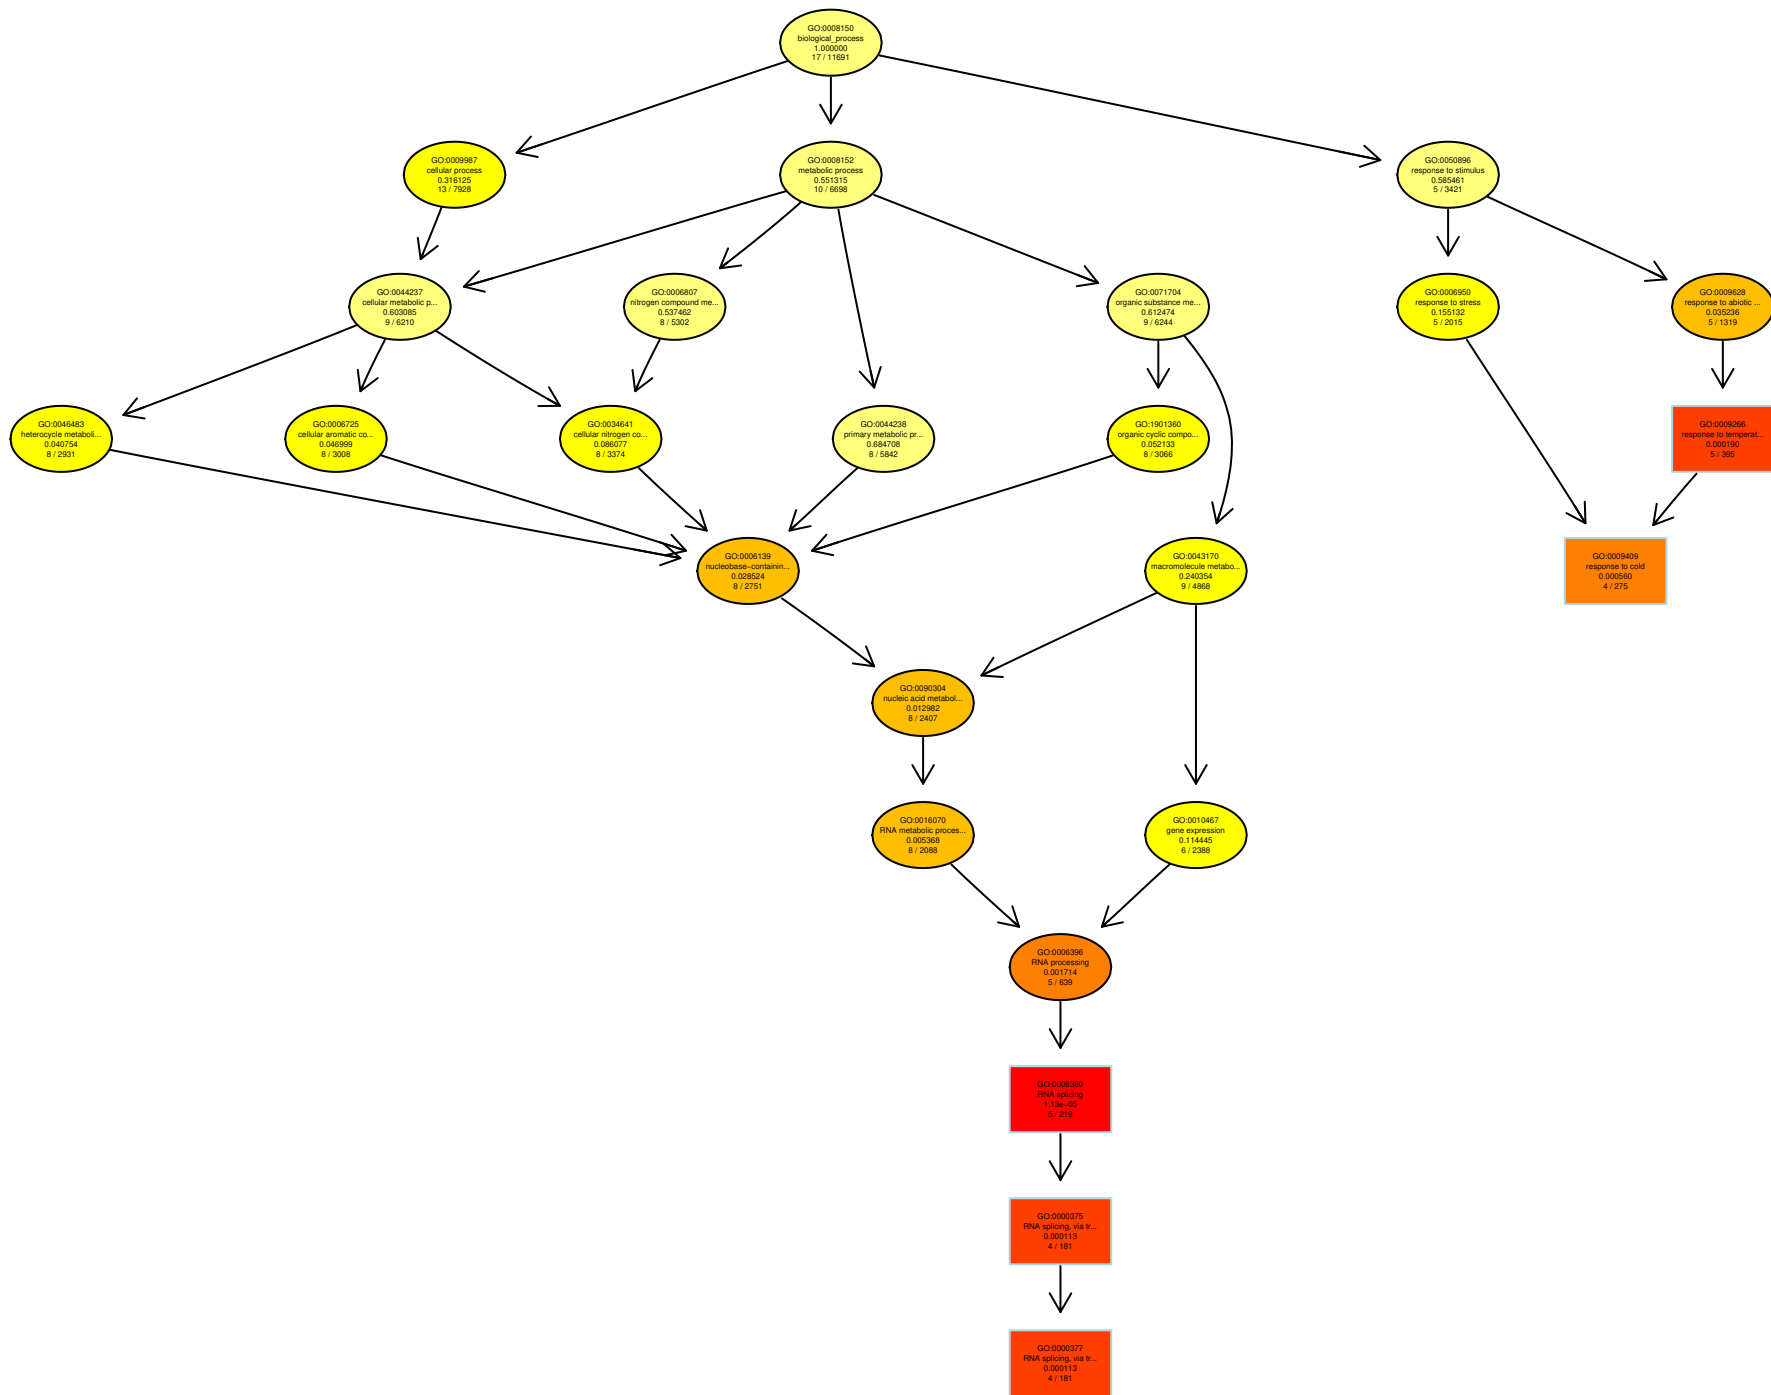

Supplement: PLD3-6-e396-s129.pdf [file PLD3-6-e396-s129.pdf]

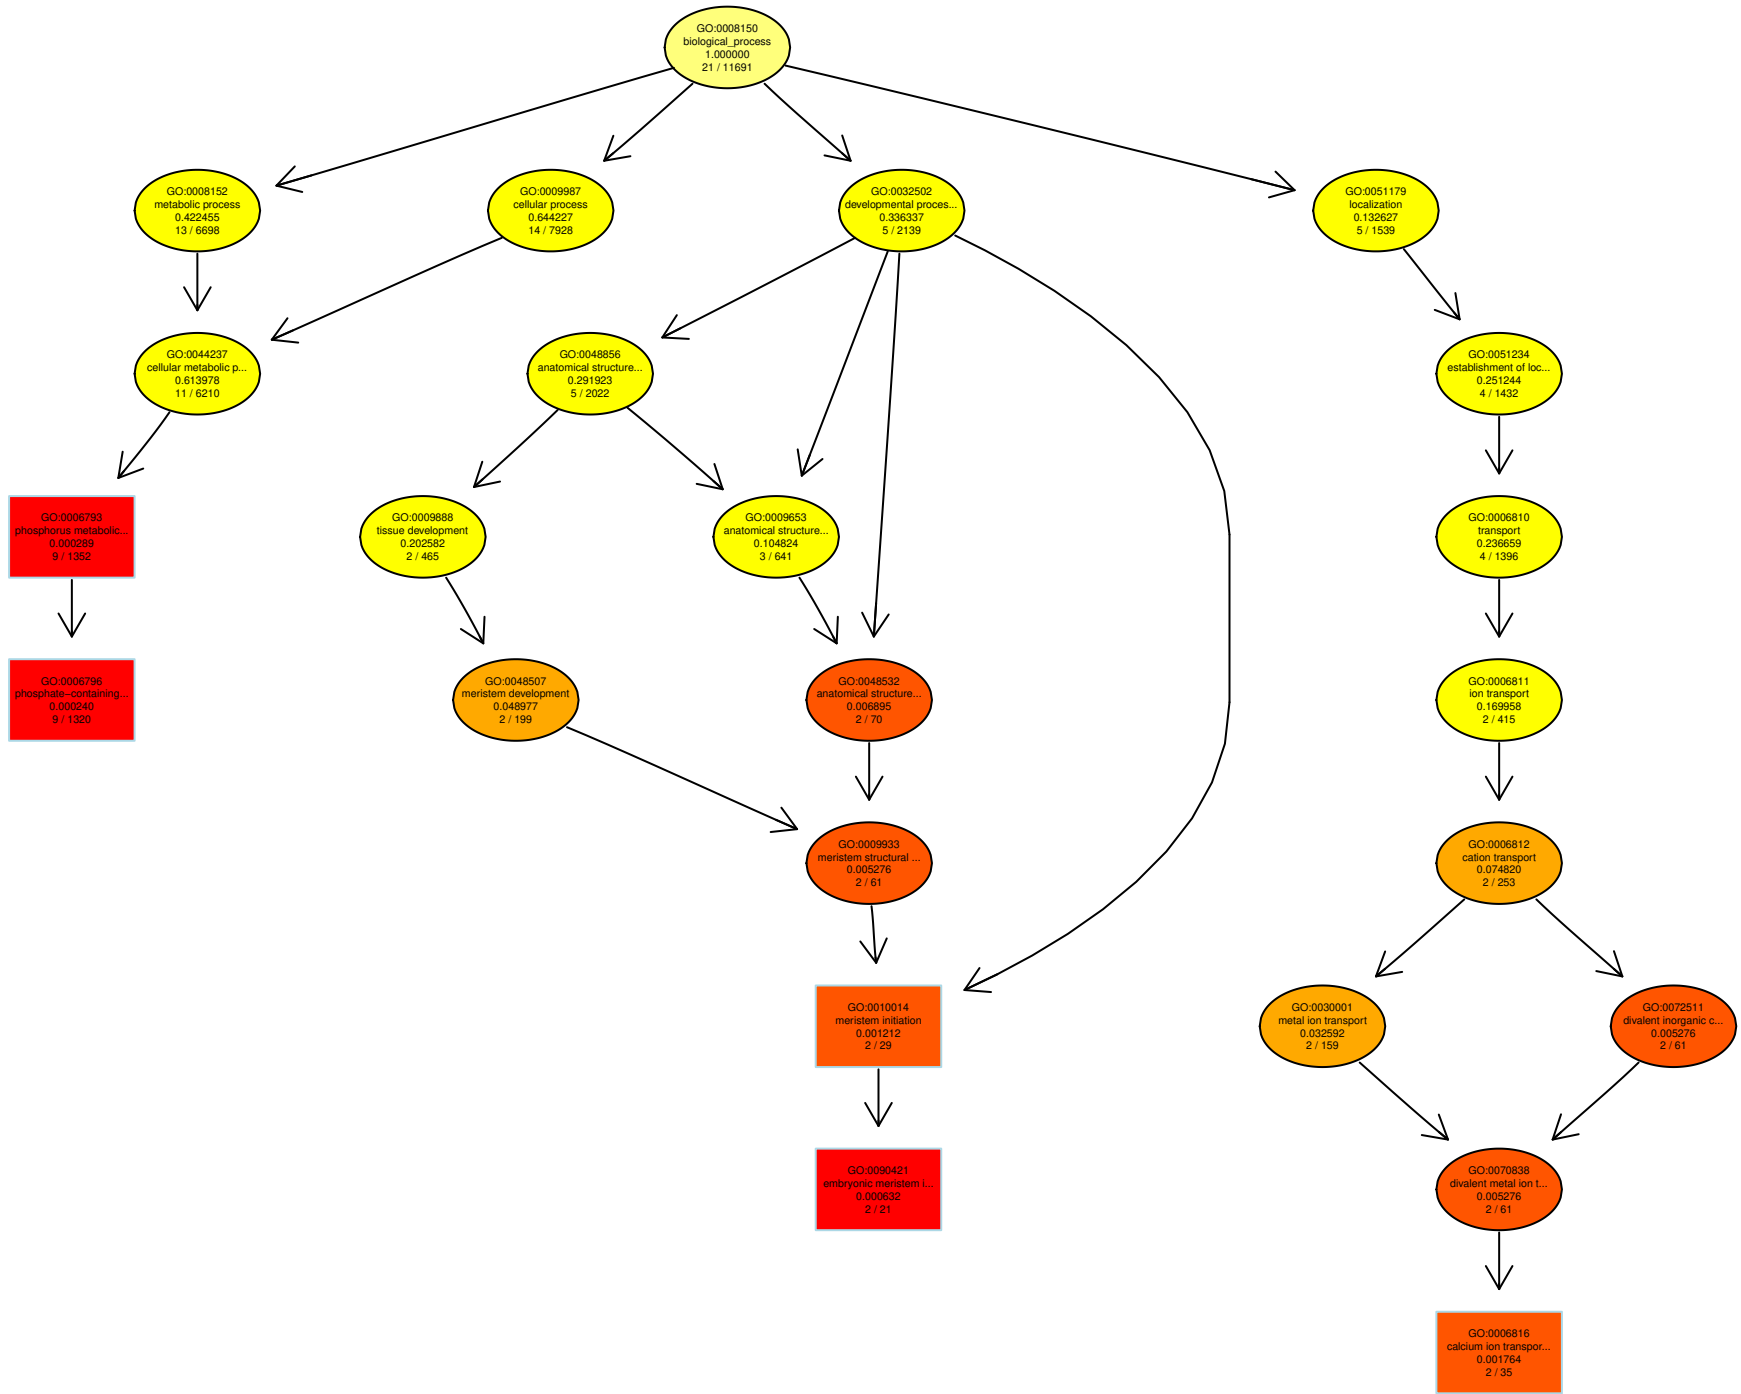

Supplement: PLD3-6-e396-s130.pdf [file PLD3-6-e396-s130.pdf]

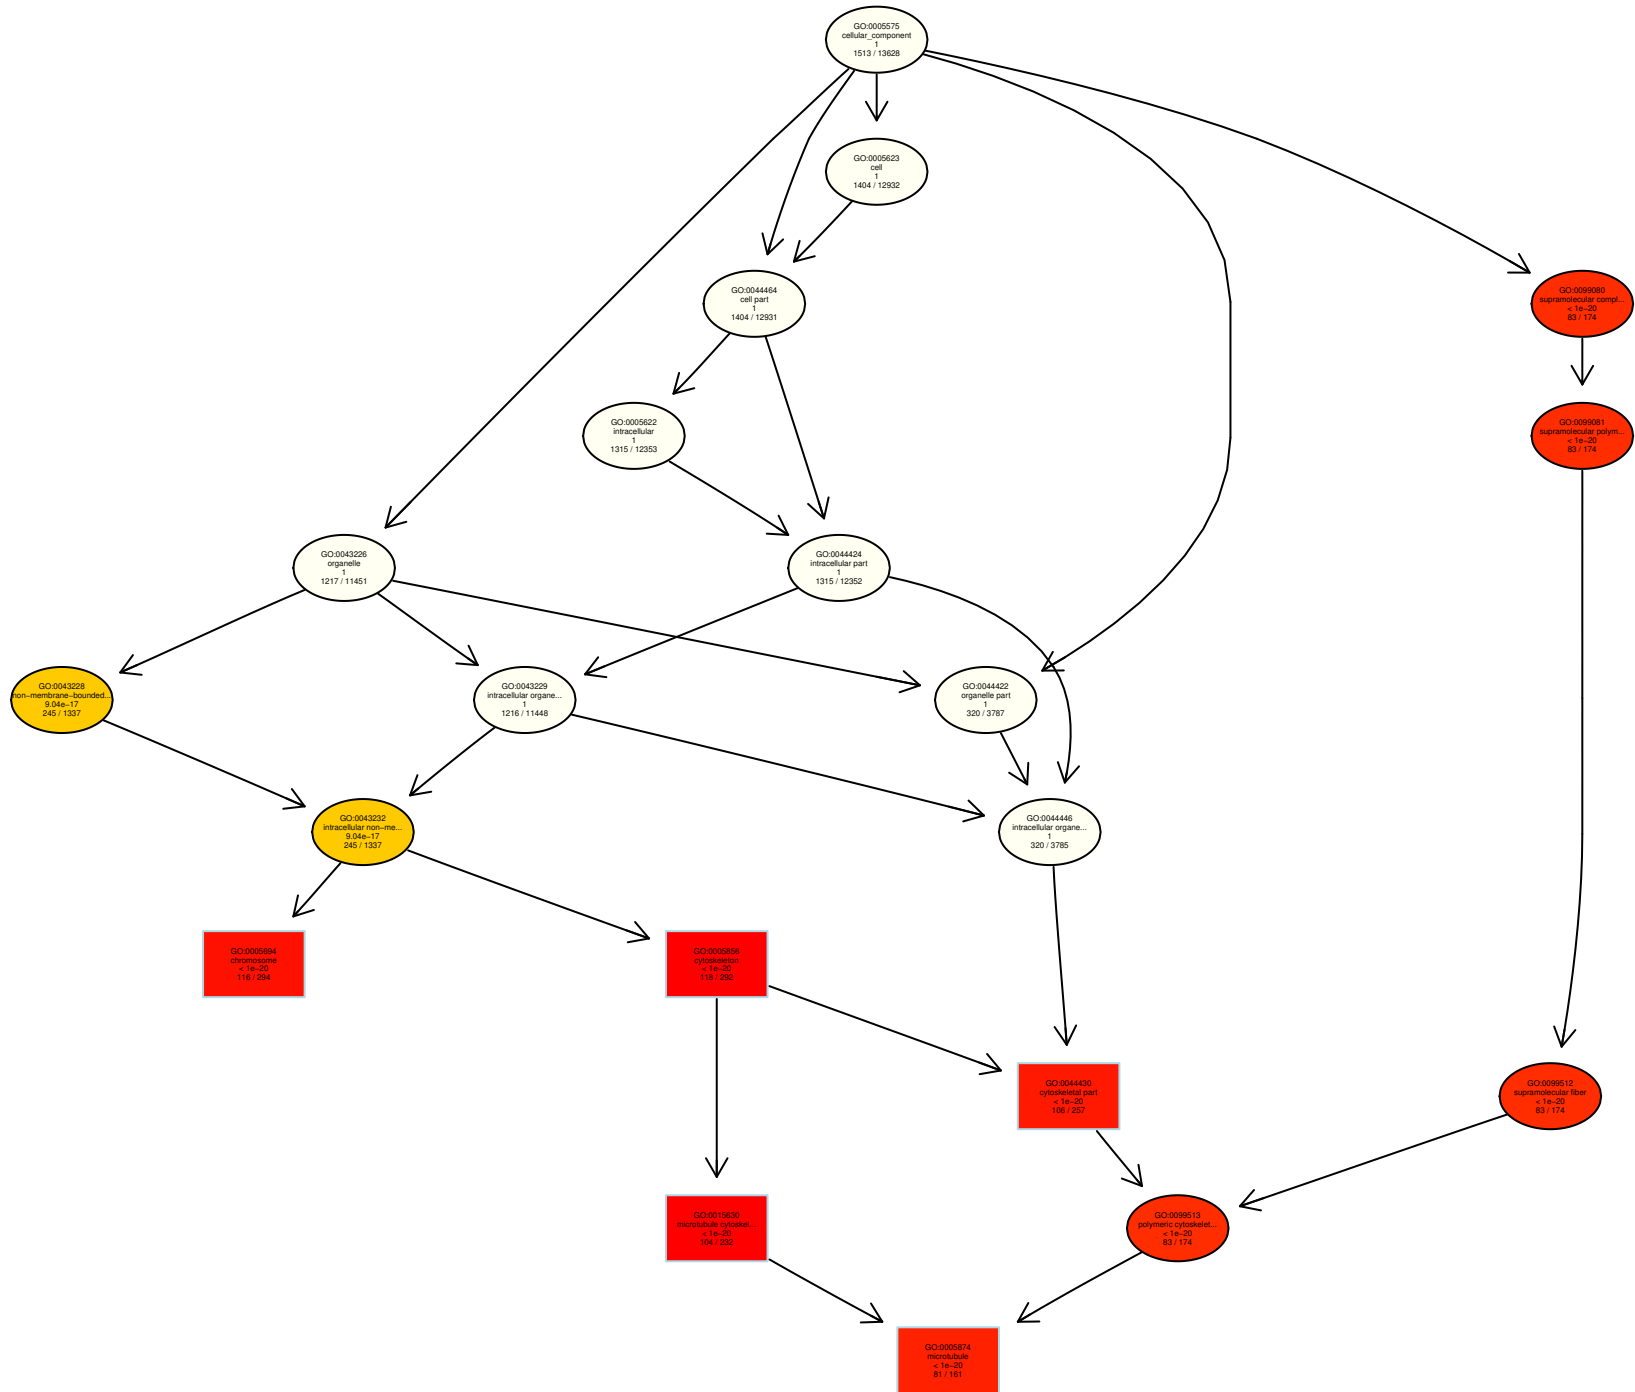

Supplement: PLD3-6-e396-s131.pdf [file PLD3-6-e396-s131.pdf]

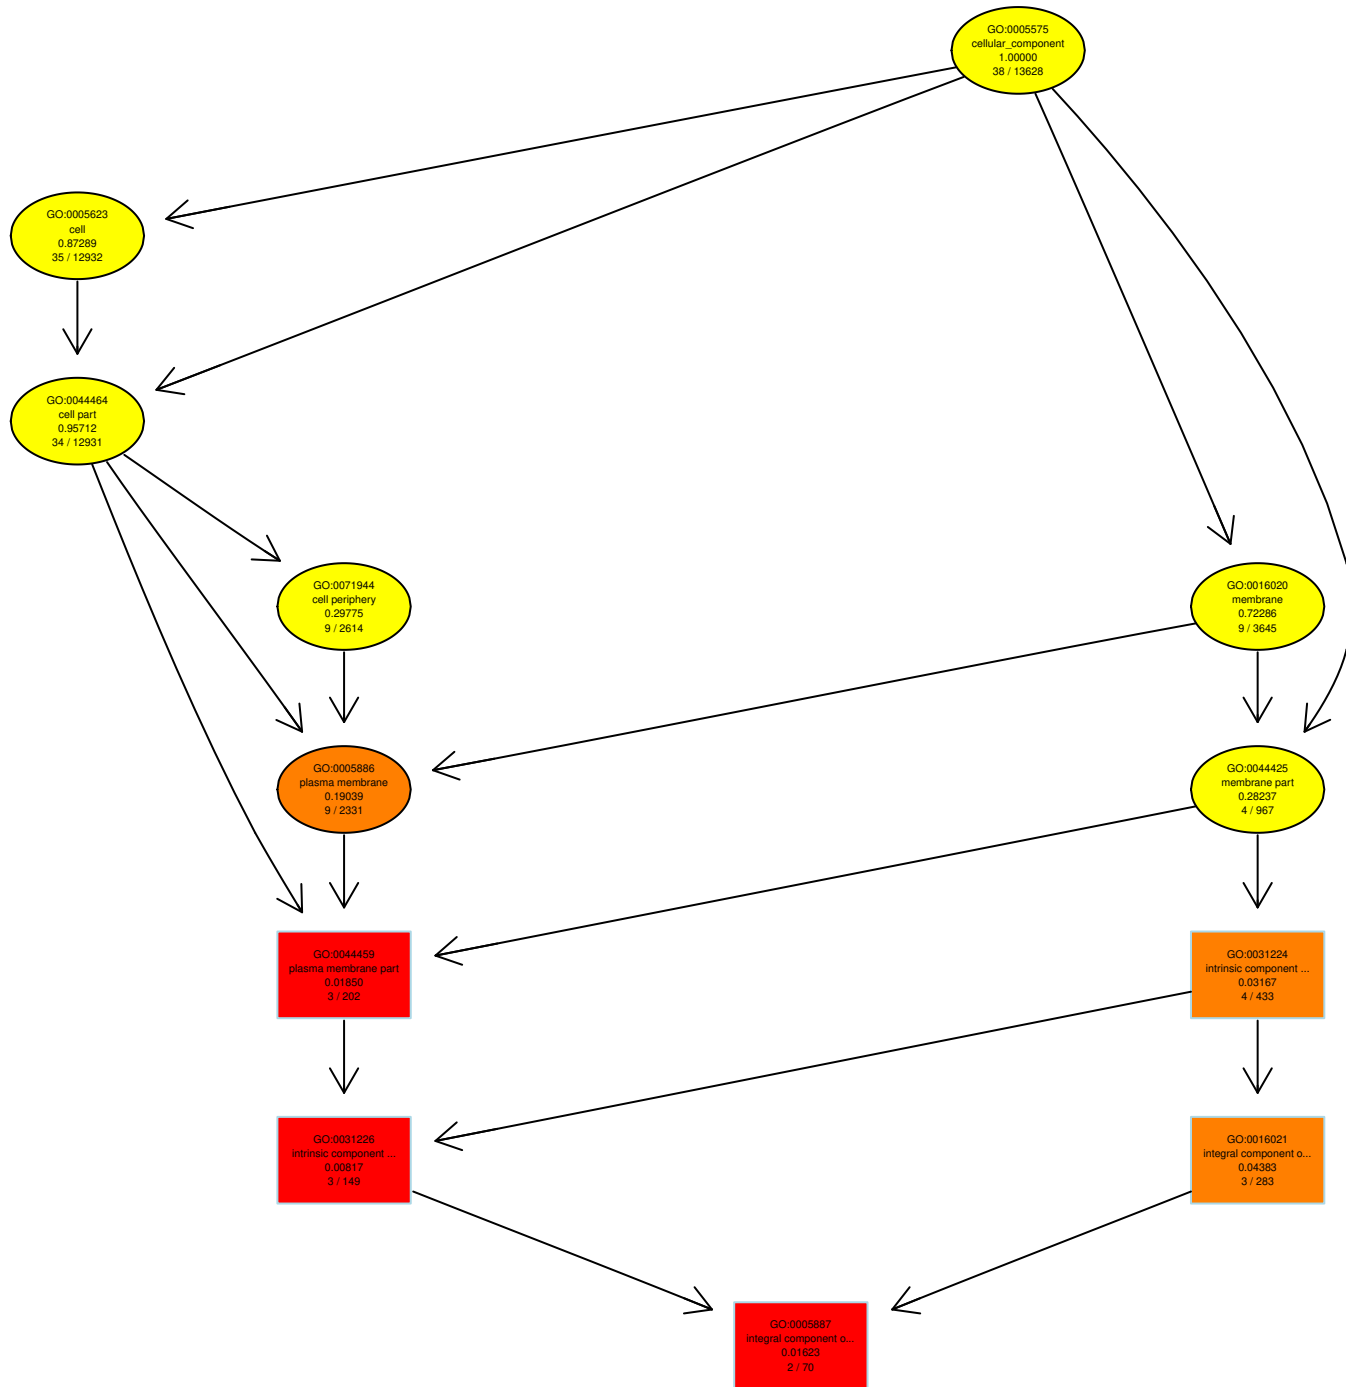

Supplement: PLD3-6-e396-s132.pdf [file PLD3-6-e396-s132.pdf]

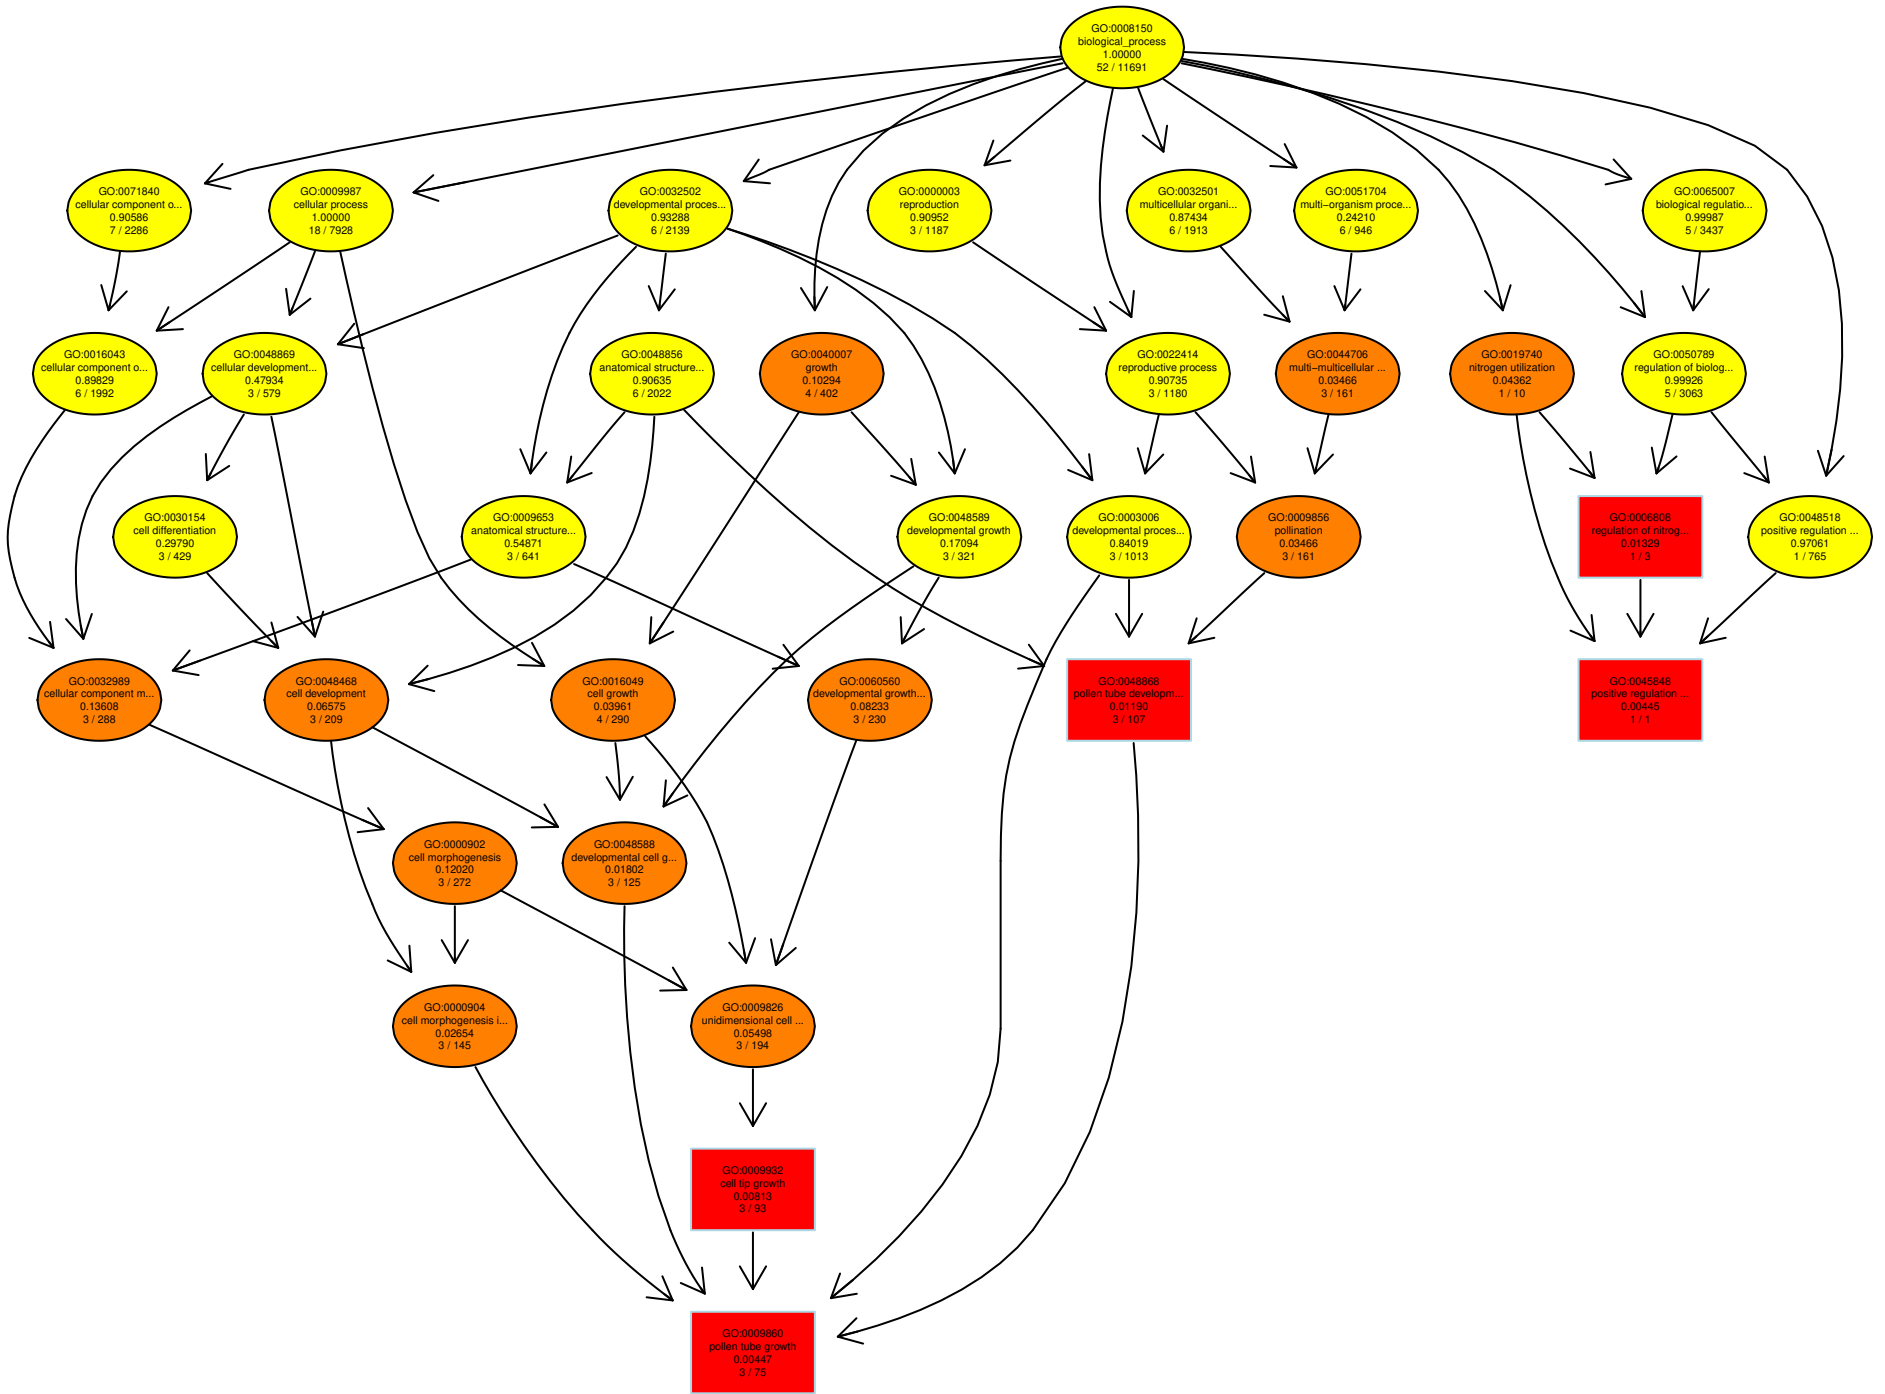

Supplement: PLD3-6-e396-s133.pdf [file PLD3-6-e396-s133.pdf]

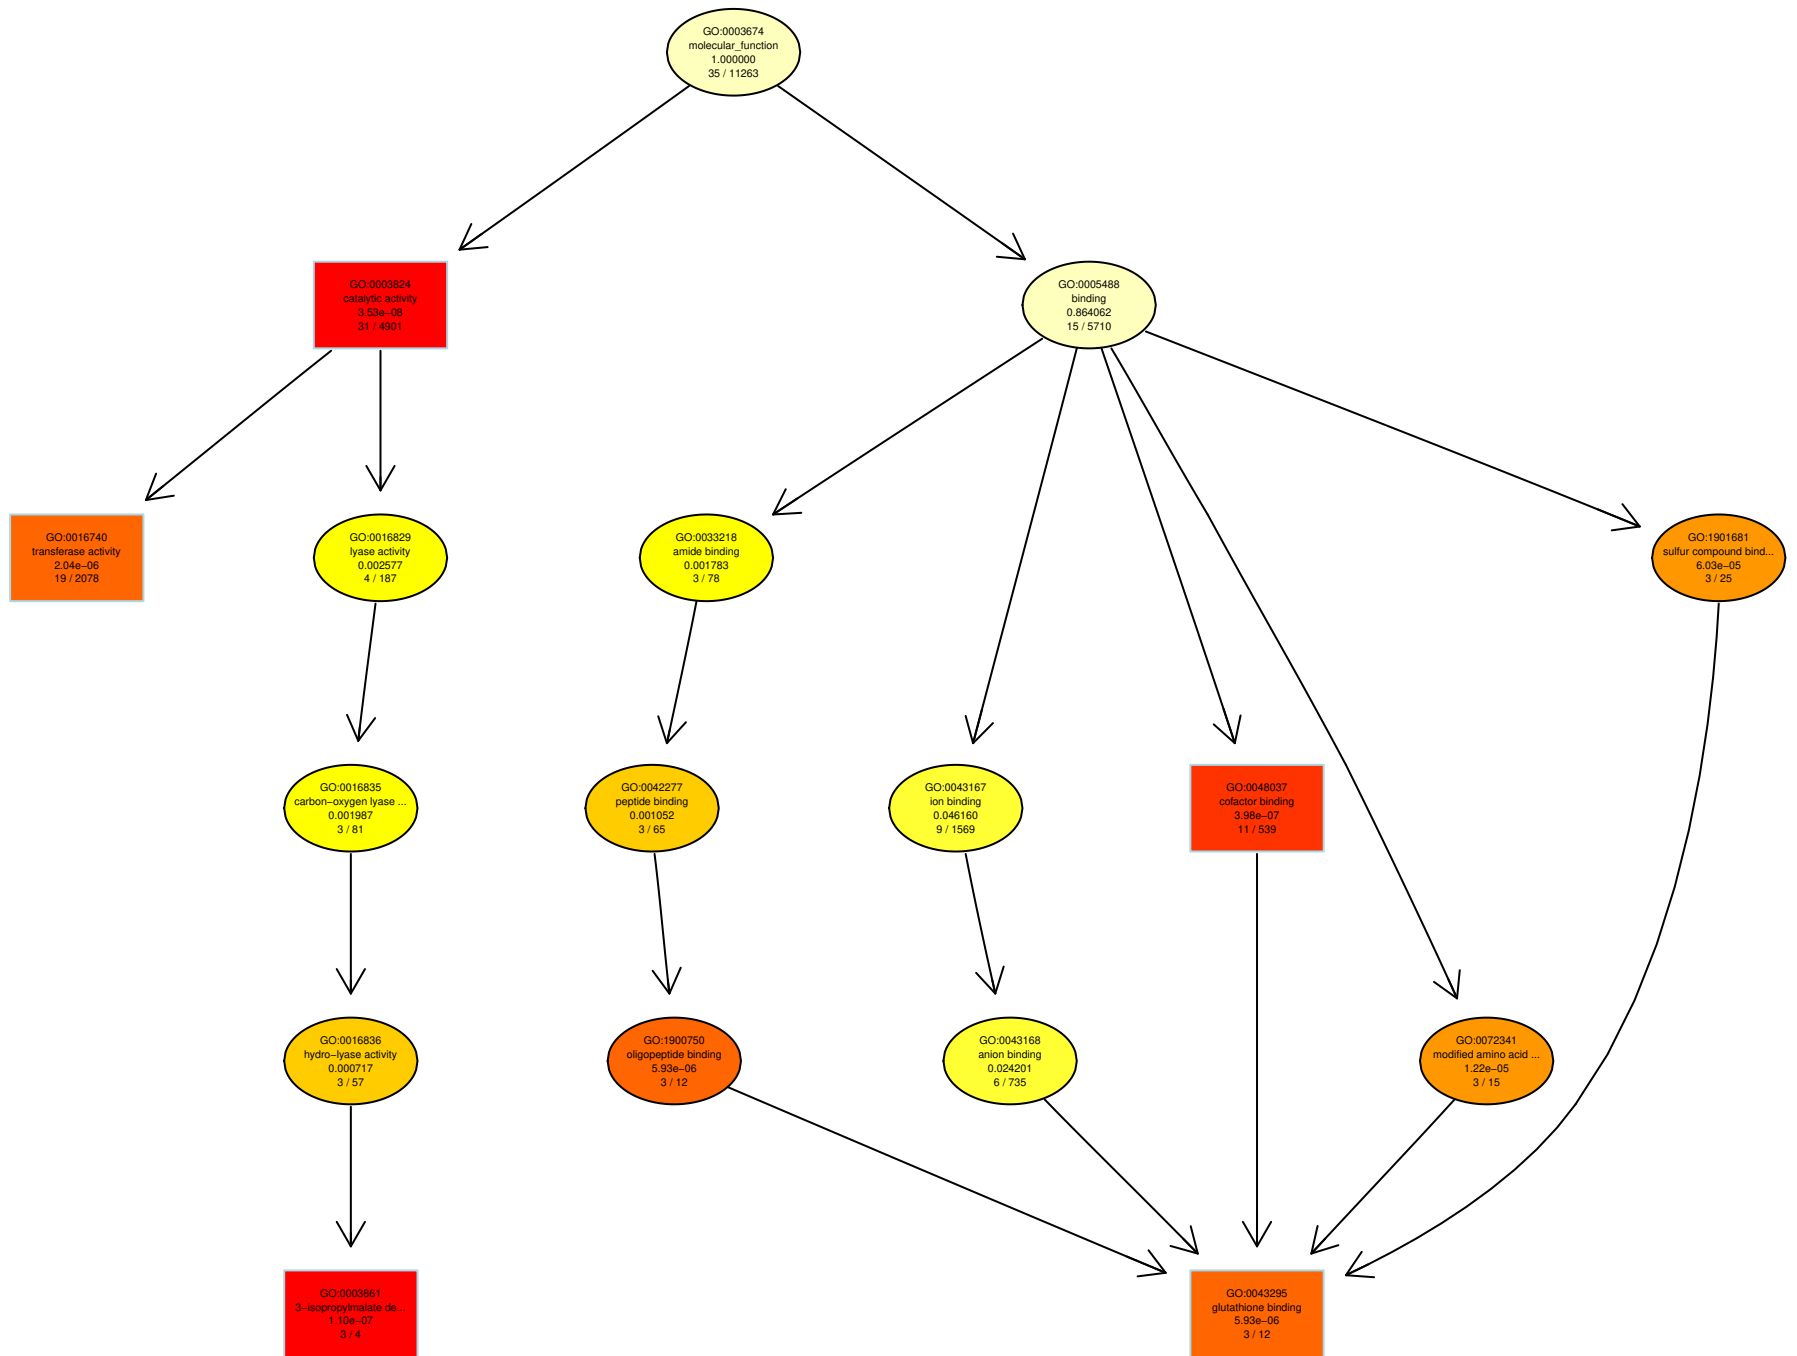

Supplement: PLD3-6-e396-s136.pdf [file PLD3-6-e396-s136.pdf]

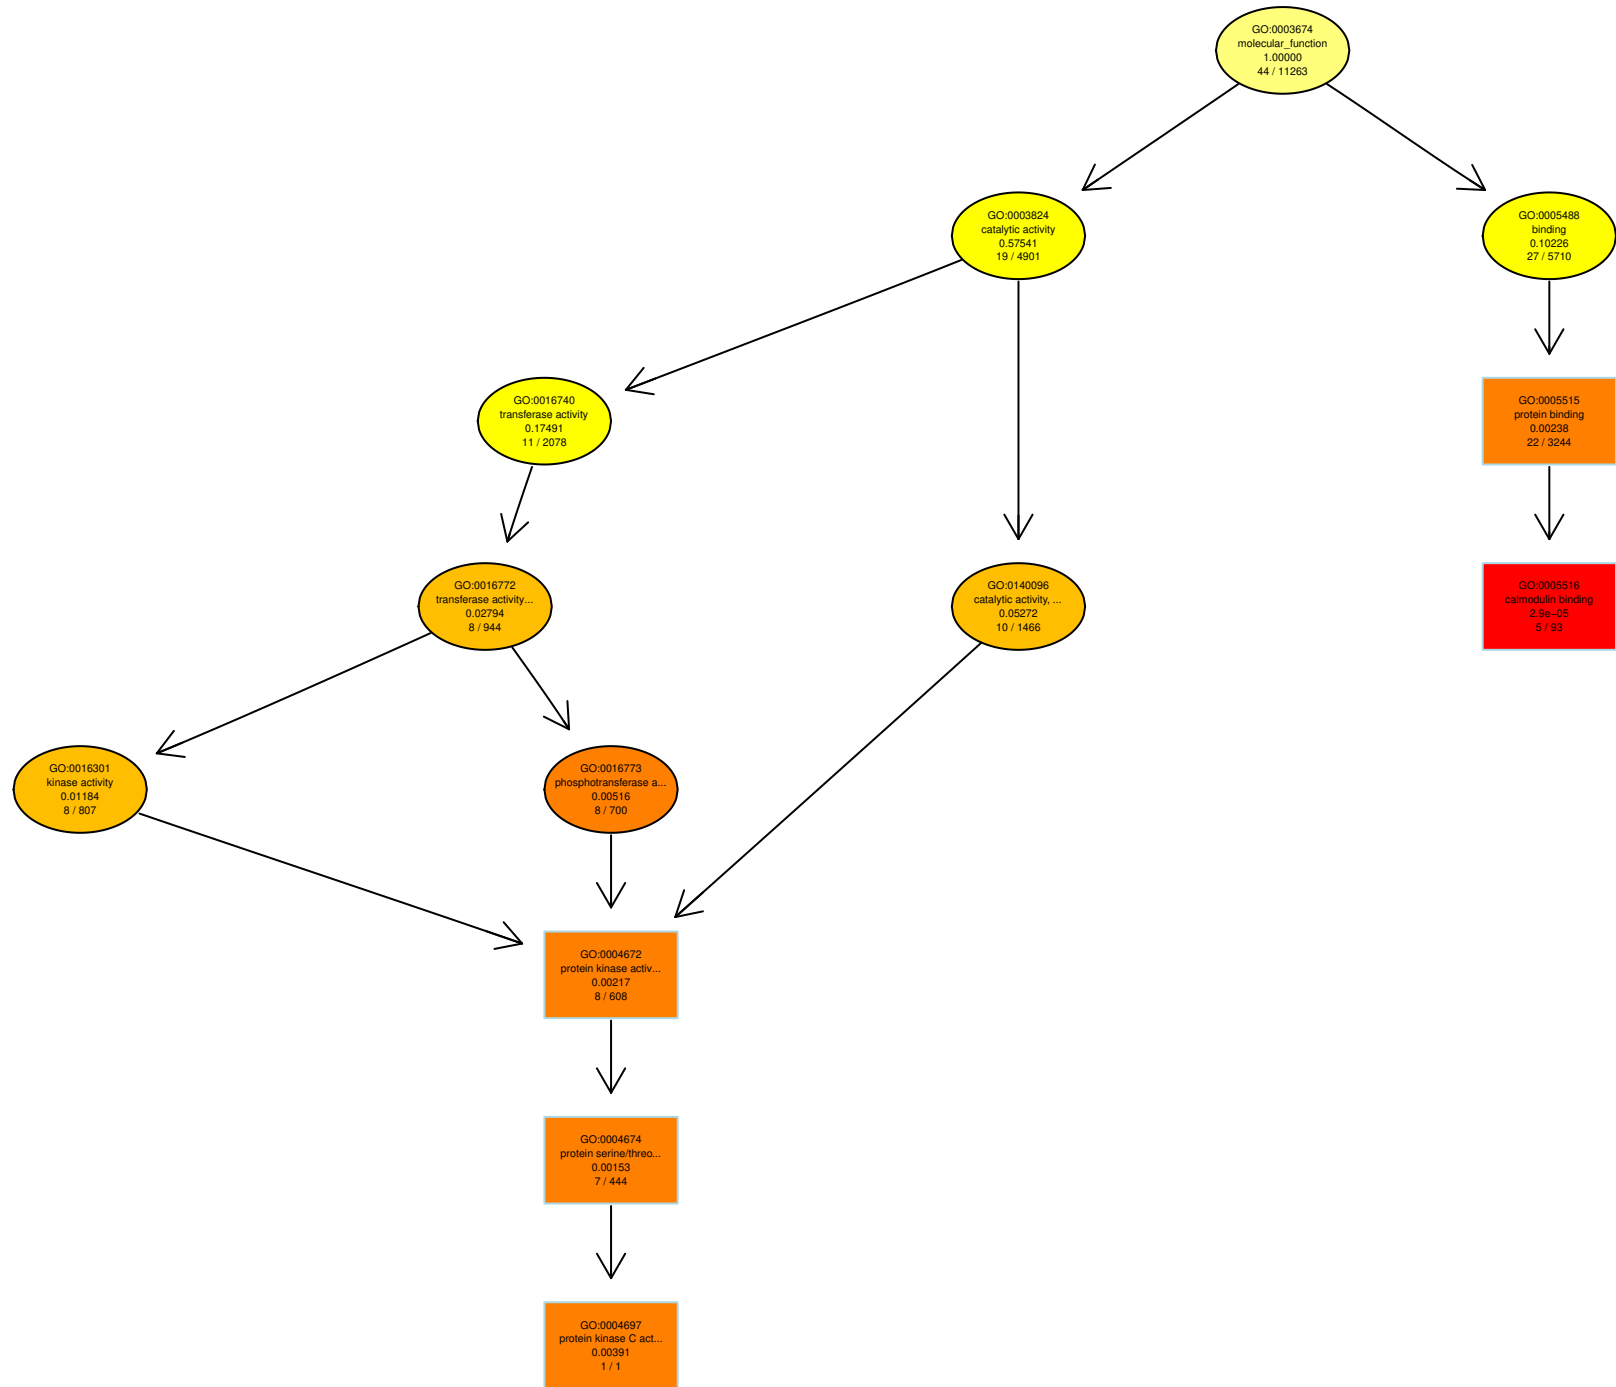

Supplement: PLD3-6-e396-s139.pdf [file PLD3-6-e396-s139.pdf]

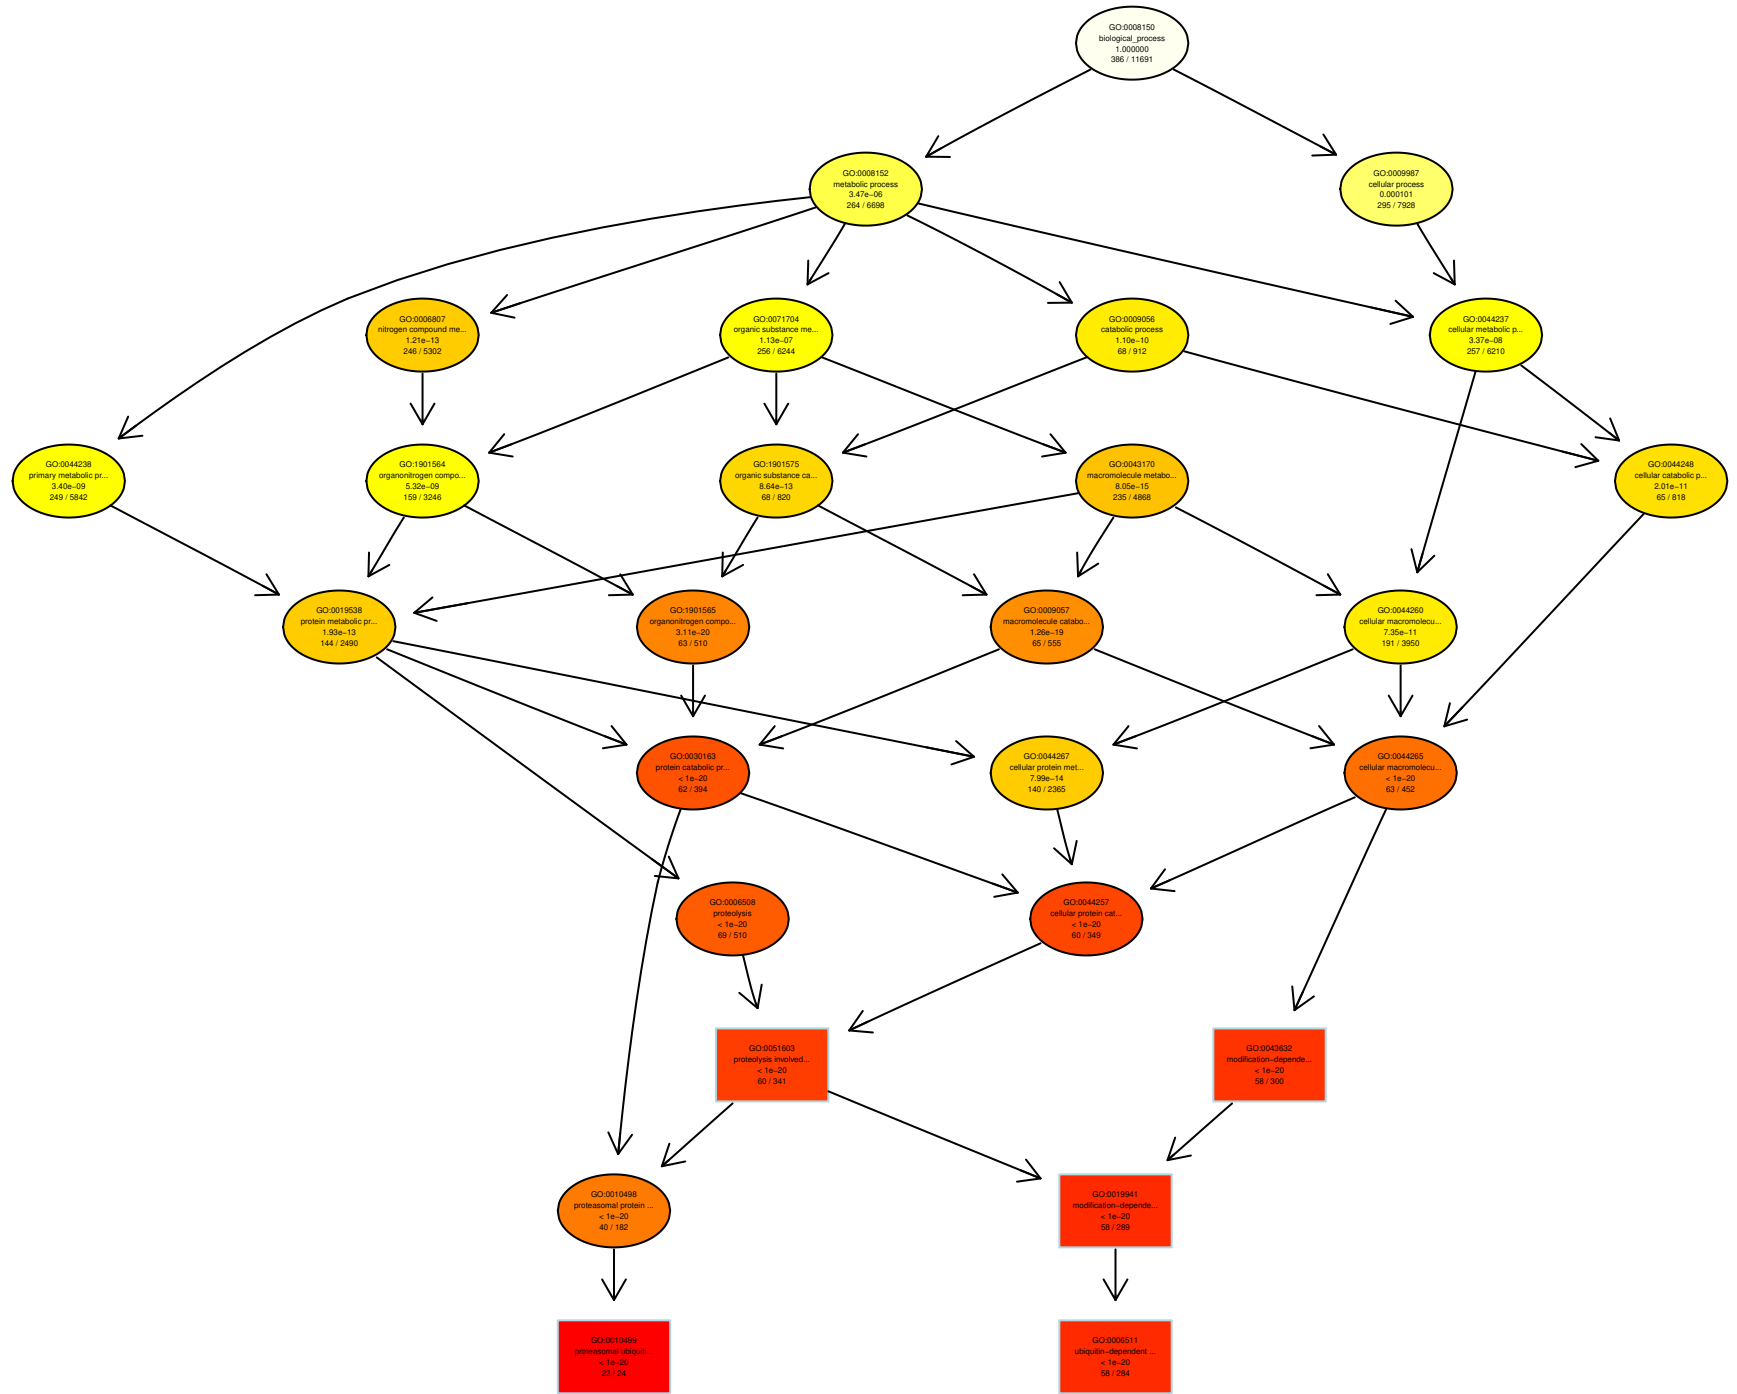

Supplement: PLD3-6-e396-s140.pdf [file PLD3-6-e396-s140.pdf]

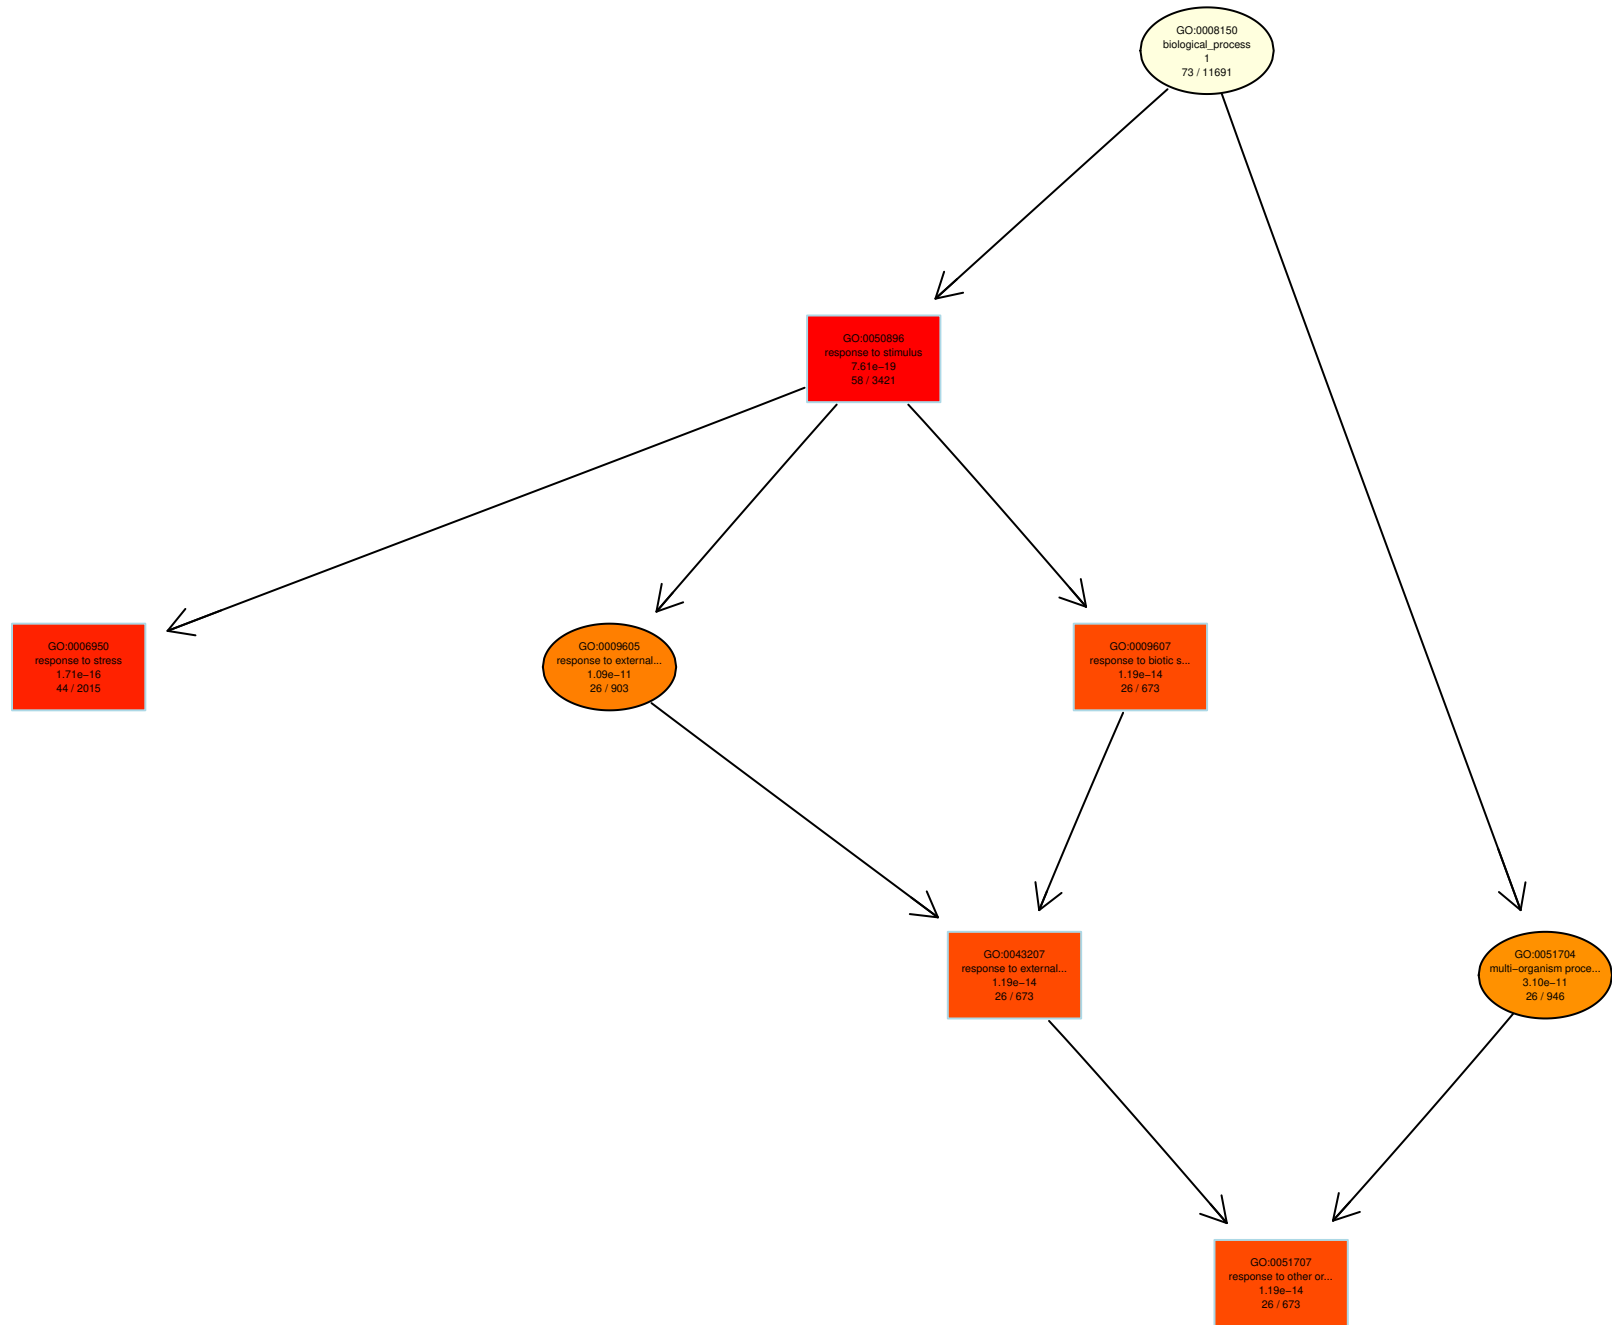

Supplement: PLD3-6-e396-s141.pdf [file PLD3-6-e396-s141.pdf]

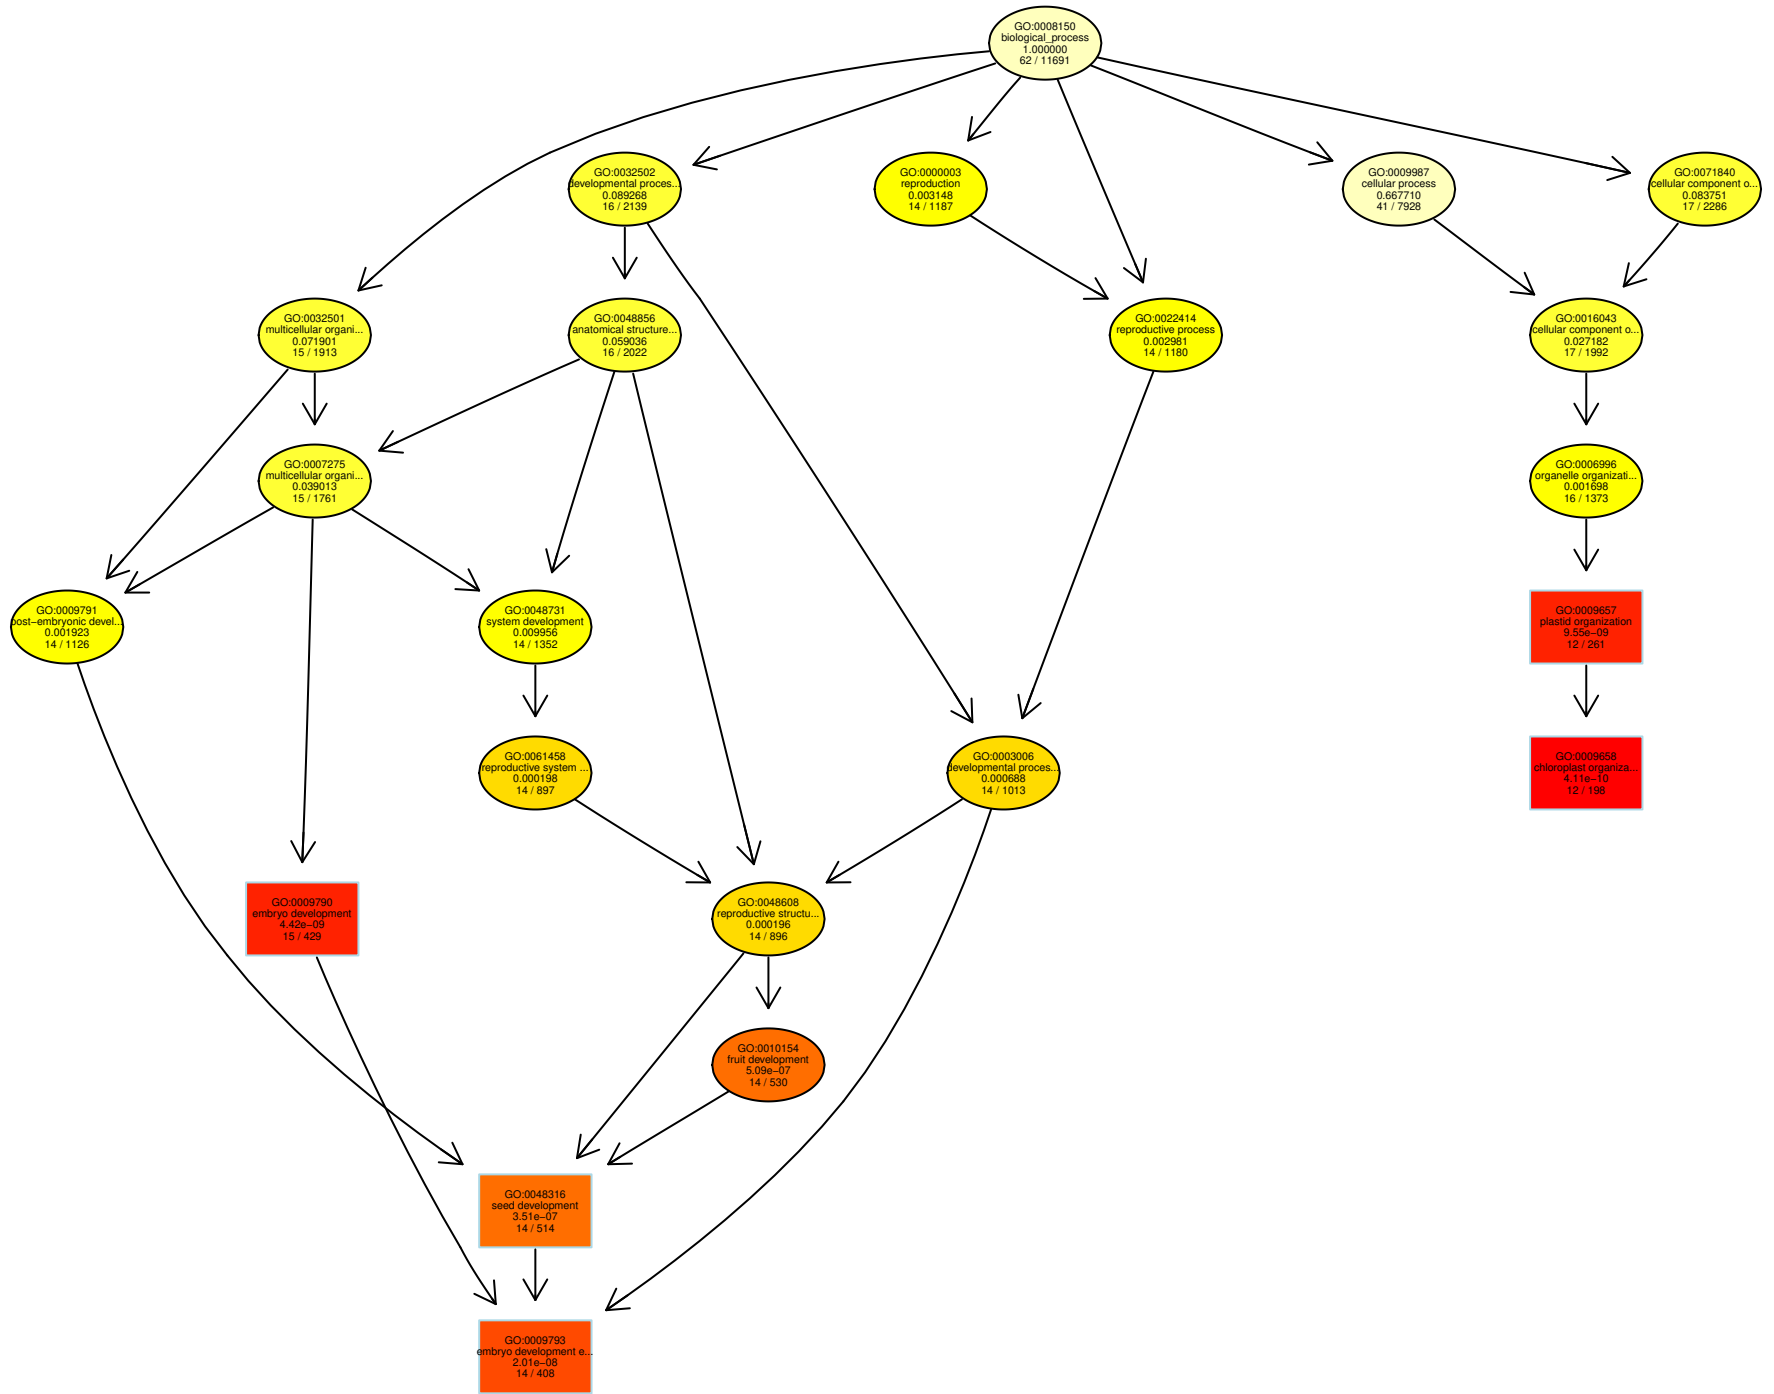

Supplement: PLD3-6-e396-s143.pdf [file PLD3-6-e396-s143.pdf]

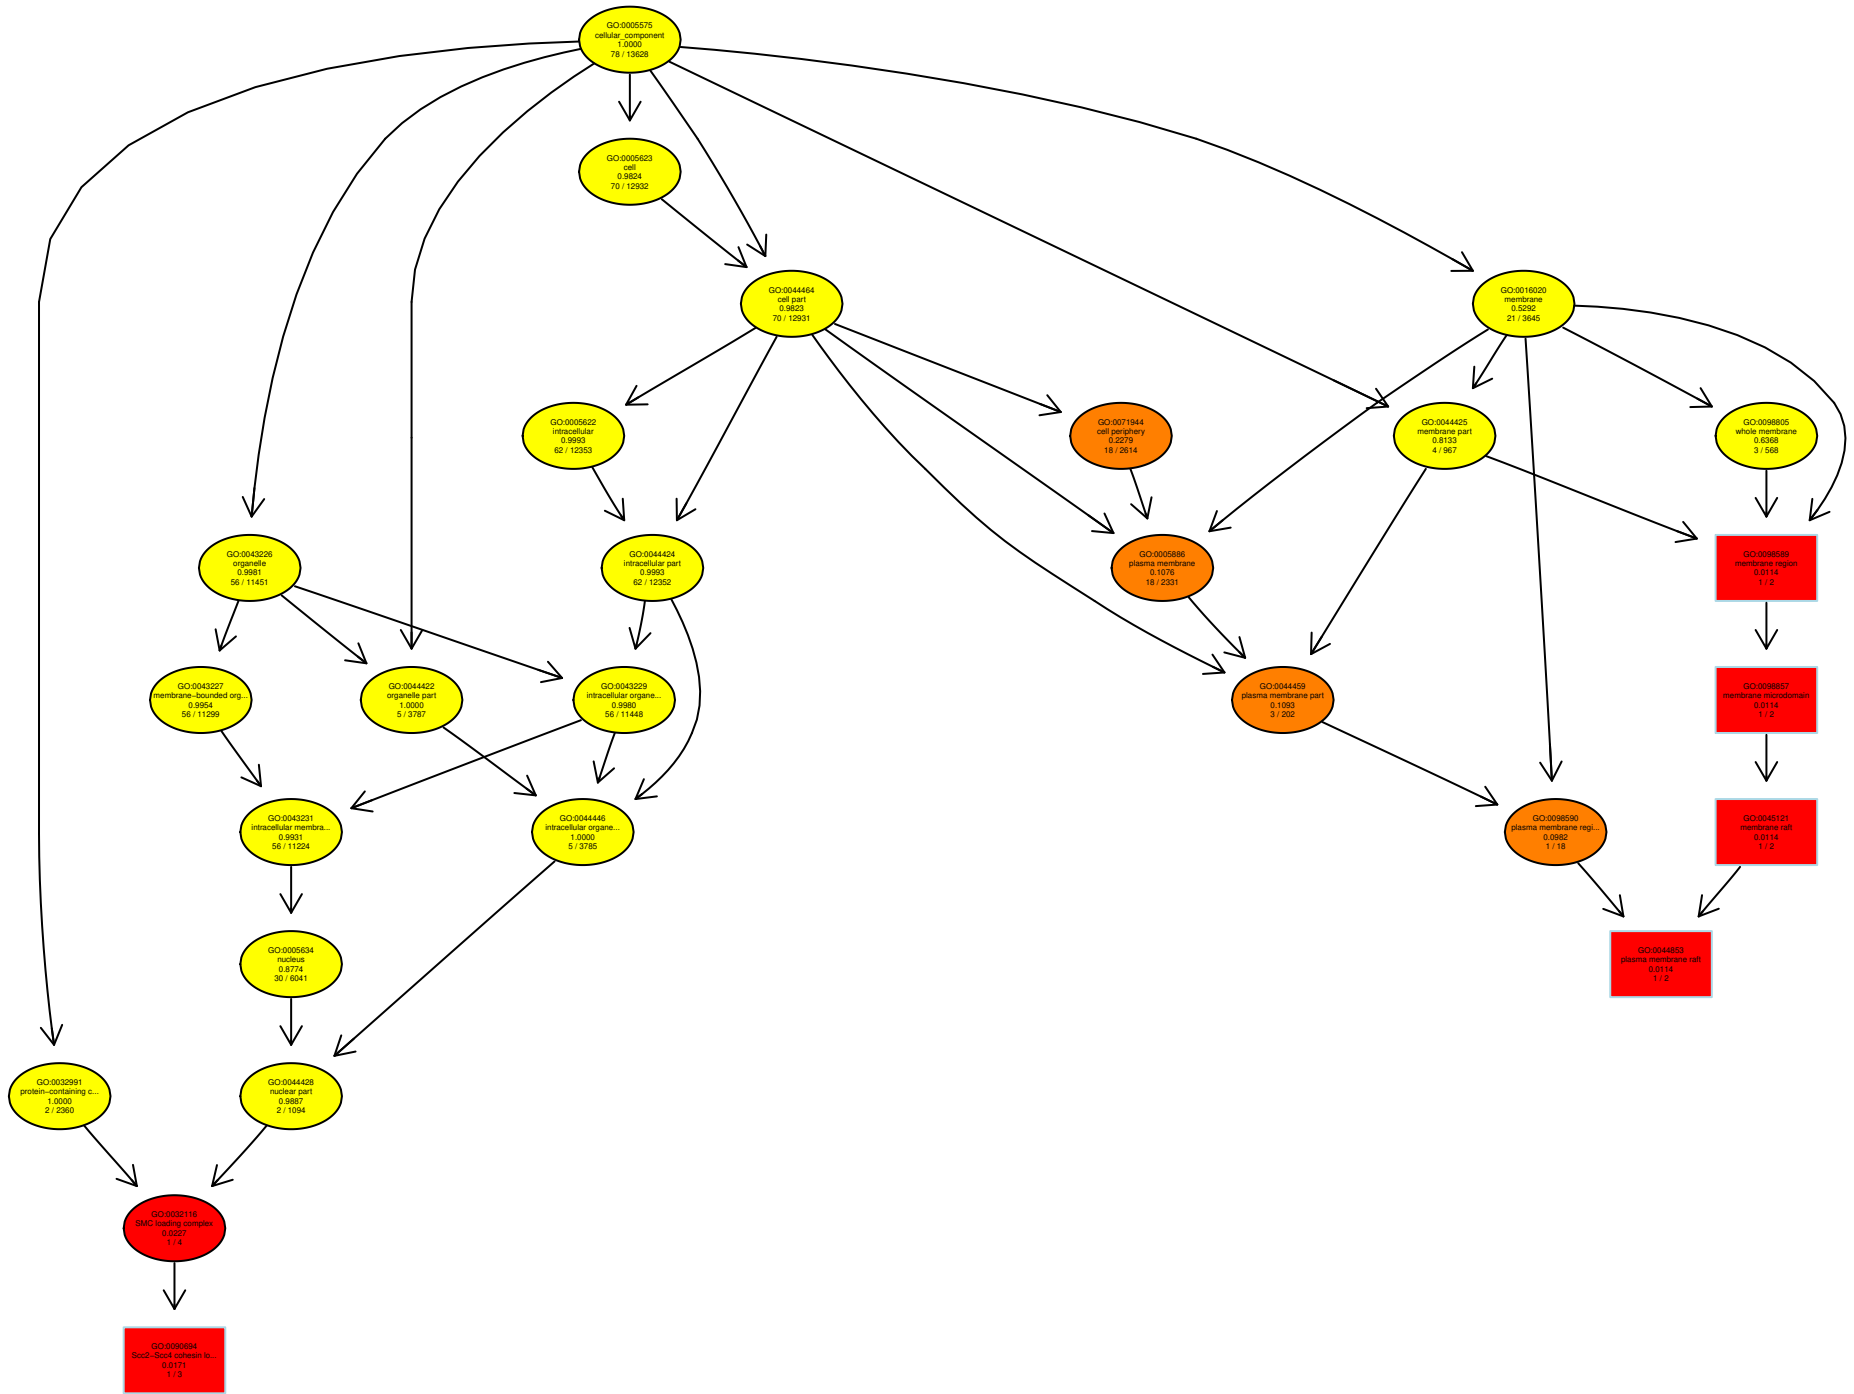

Supplement: PLD3-6-e396-s145.pdf [file PLD3-6-e396-s145.pdf]

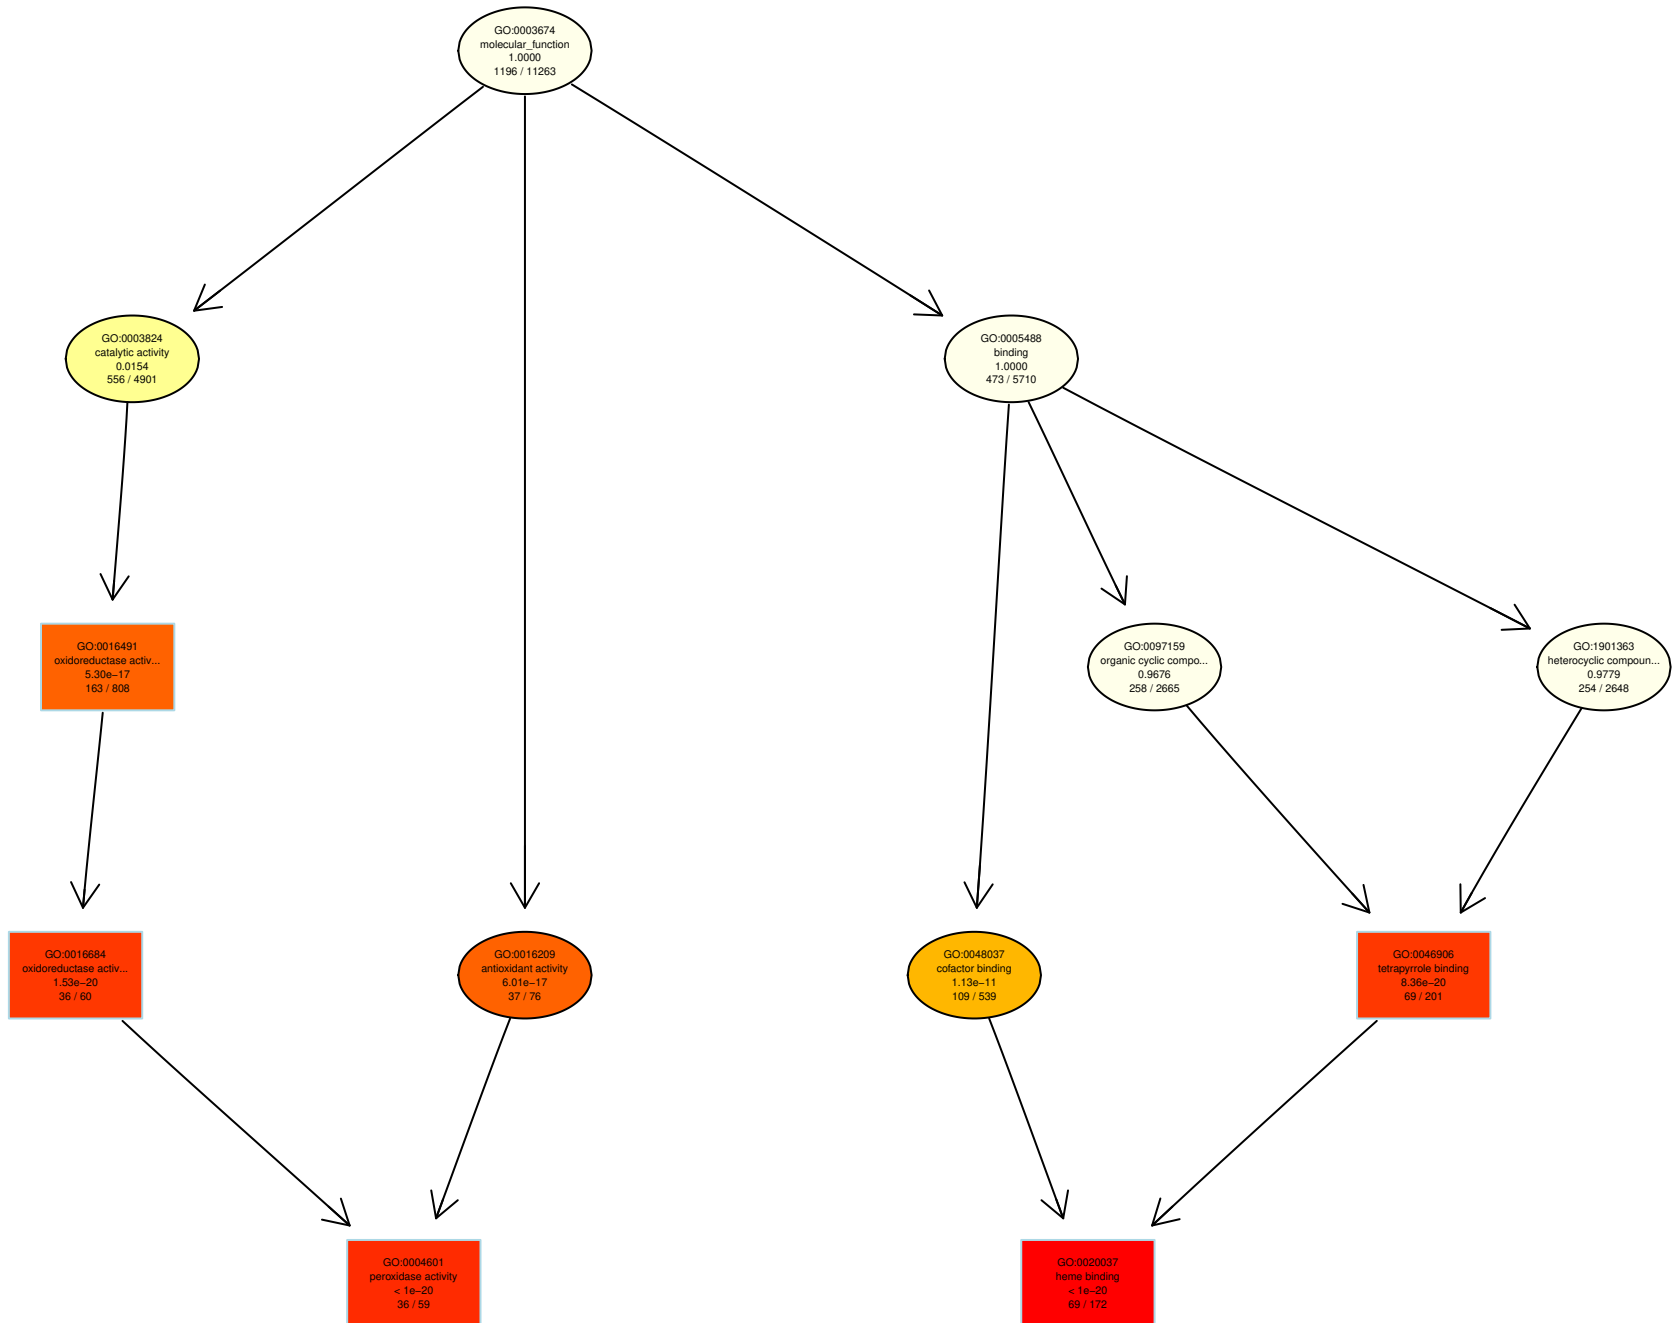

Supplement: PLD3-6-e396-s155.pdf [file PLD3-6-e396-s155.pdf]

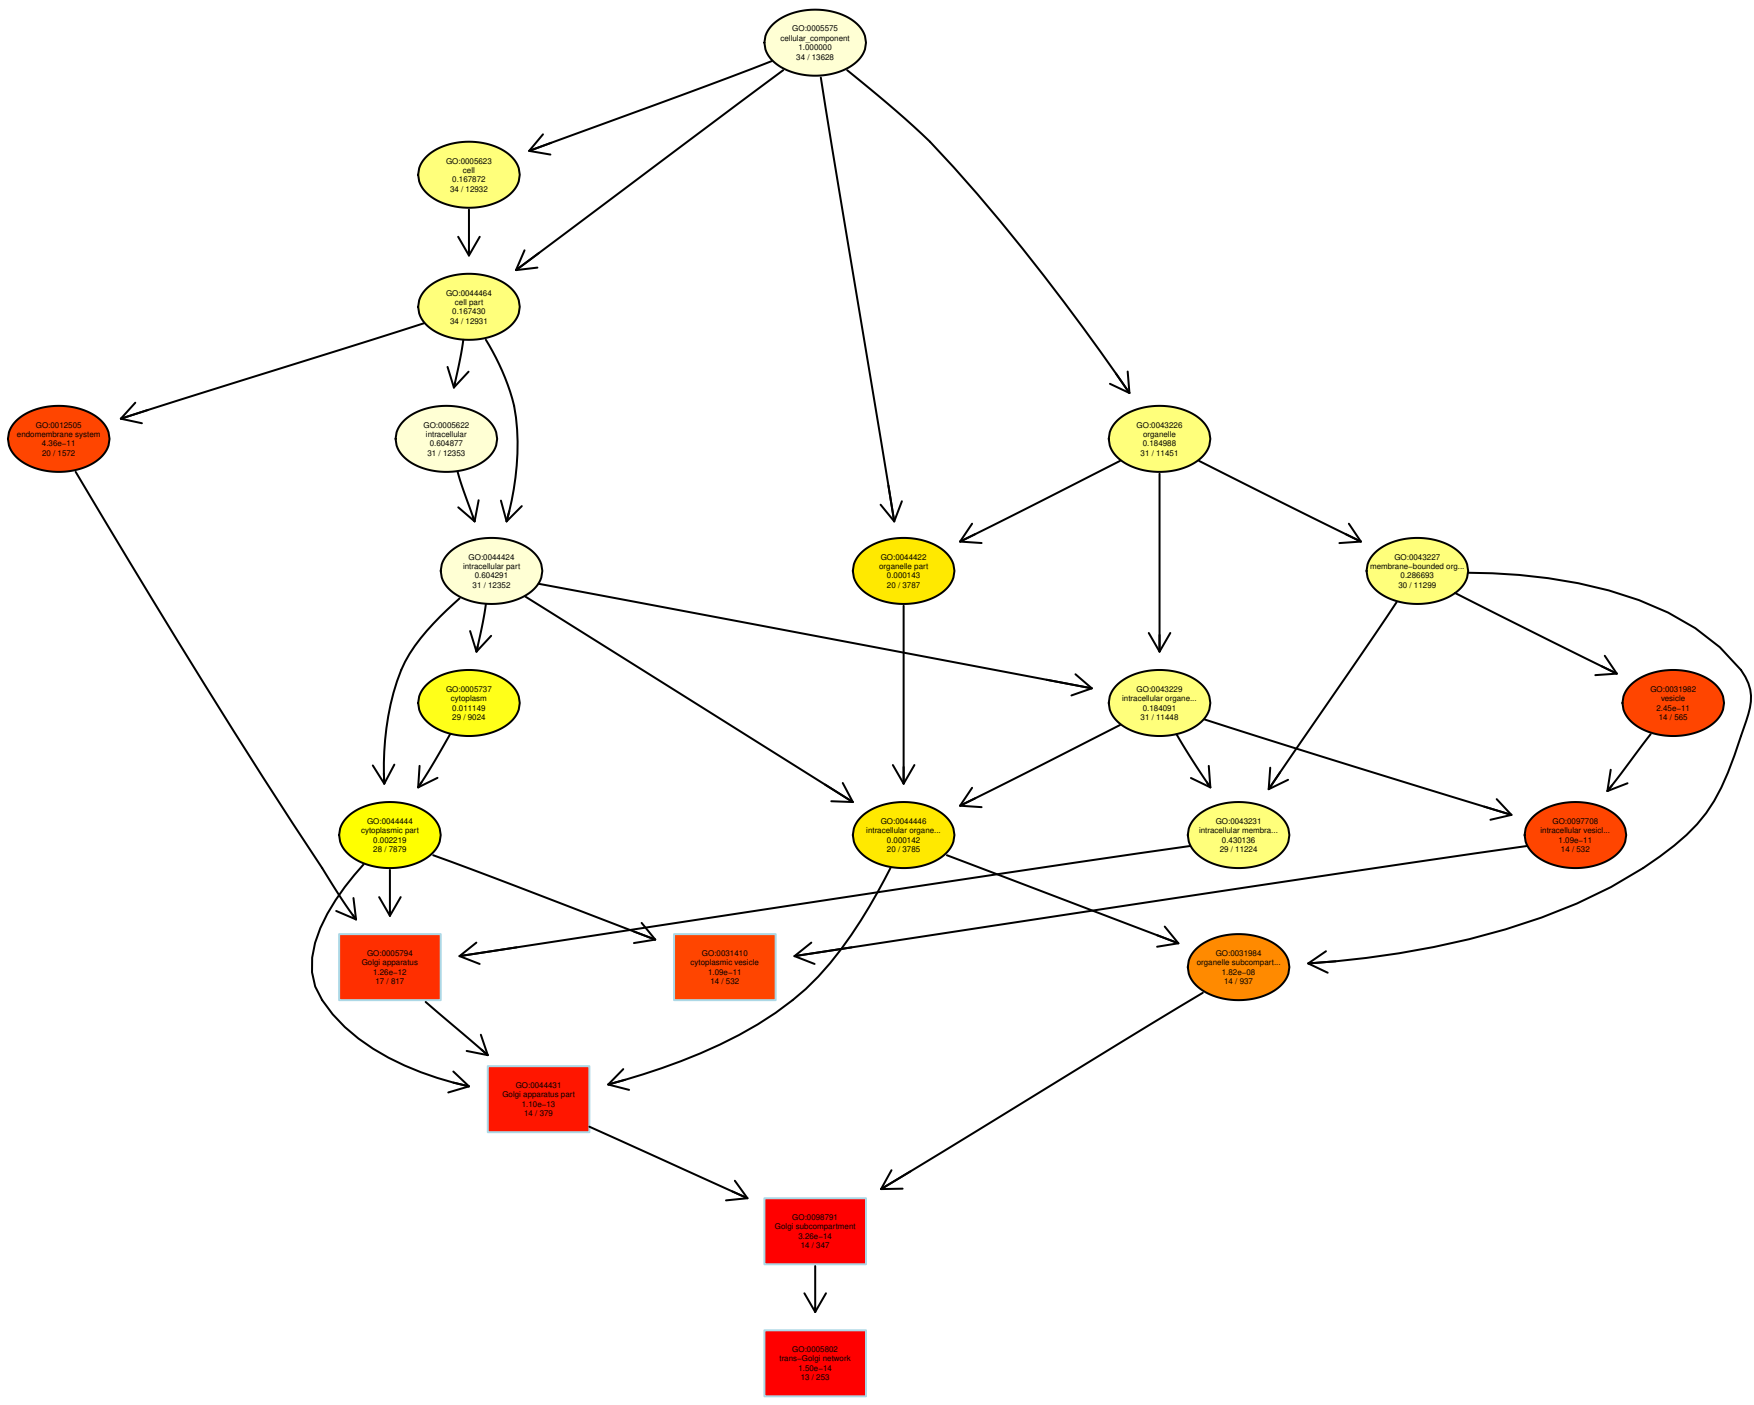

Supplement: PLD3-6-e396-s158.pdf [file PLD3-6-e396-s158.pdf]

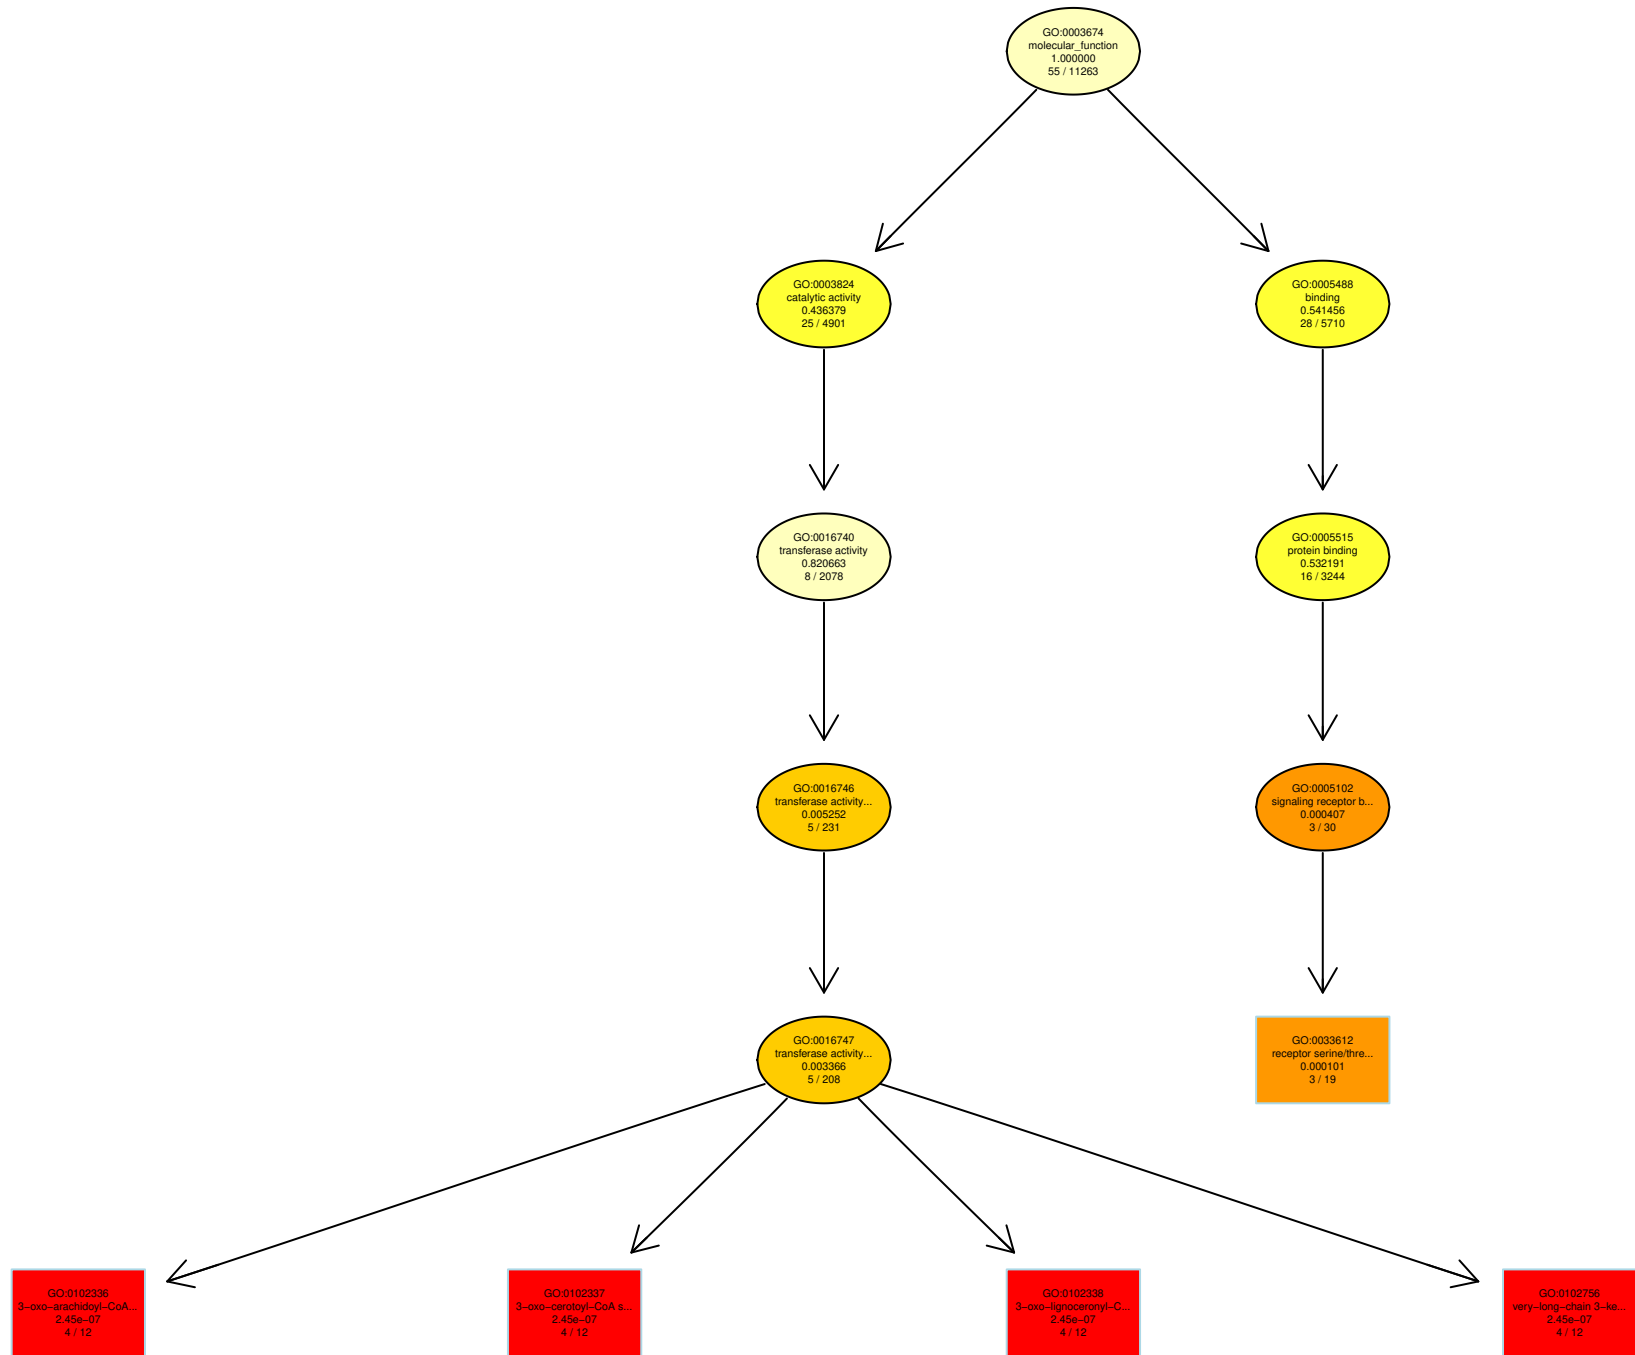

Supplement: PLD3-6-e396-s159.pdf [file PLD3-6-e396-s159.pdf]

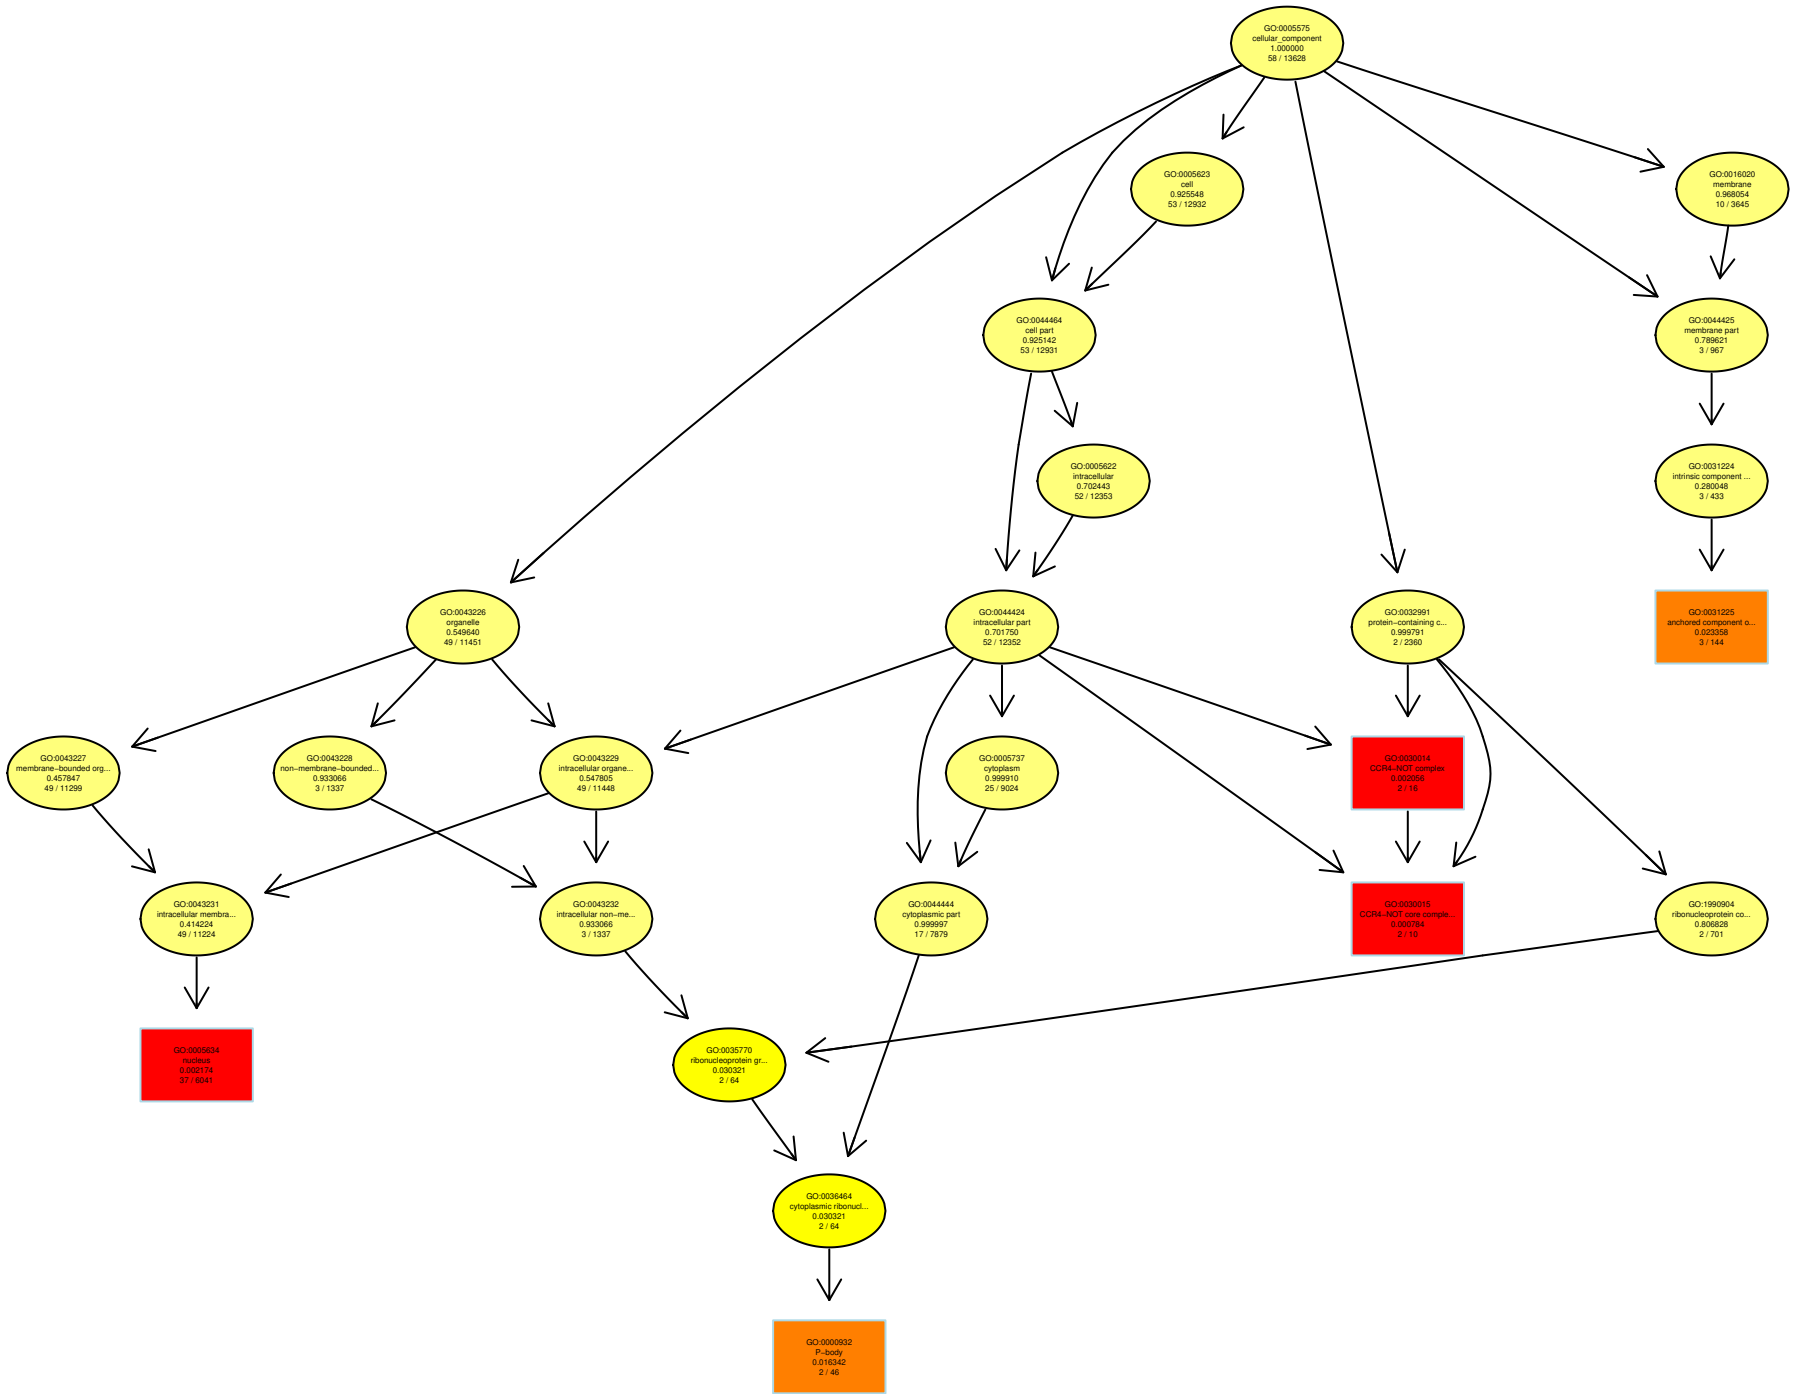

Supplement: PLD3-6-e396-s163.pdf [file PLD3-6-e396-s163.pdf]

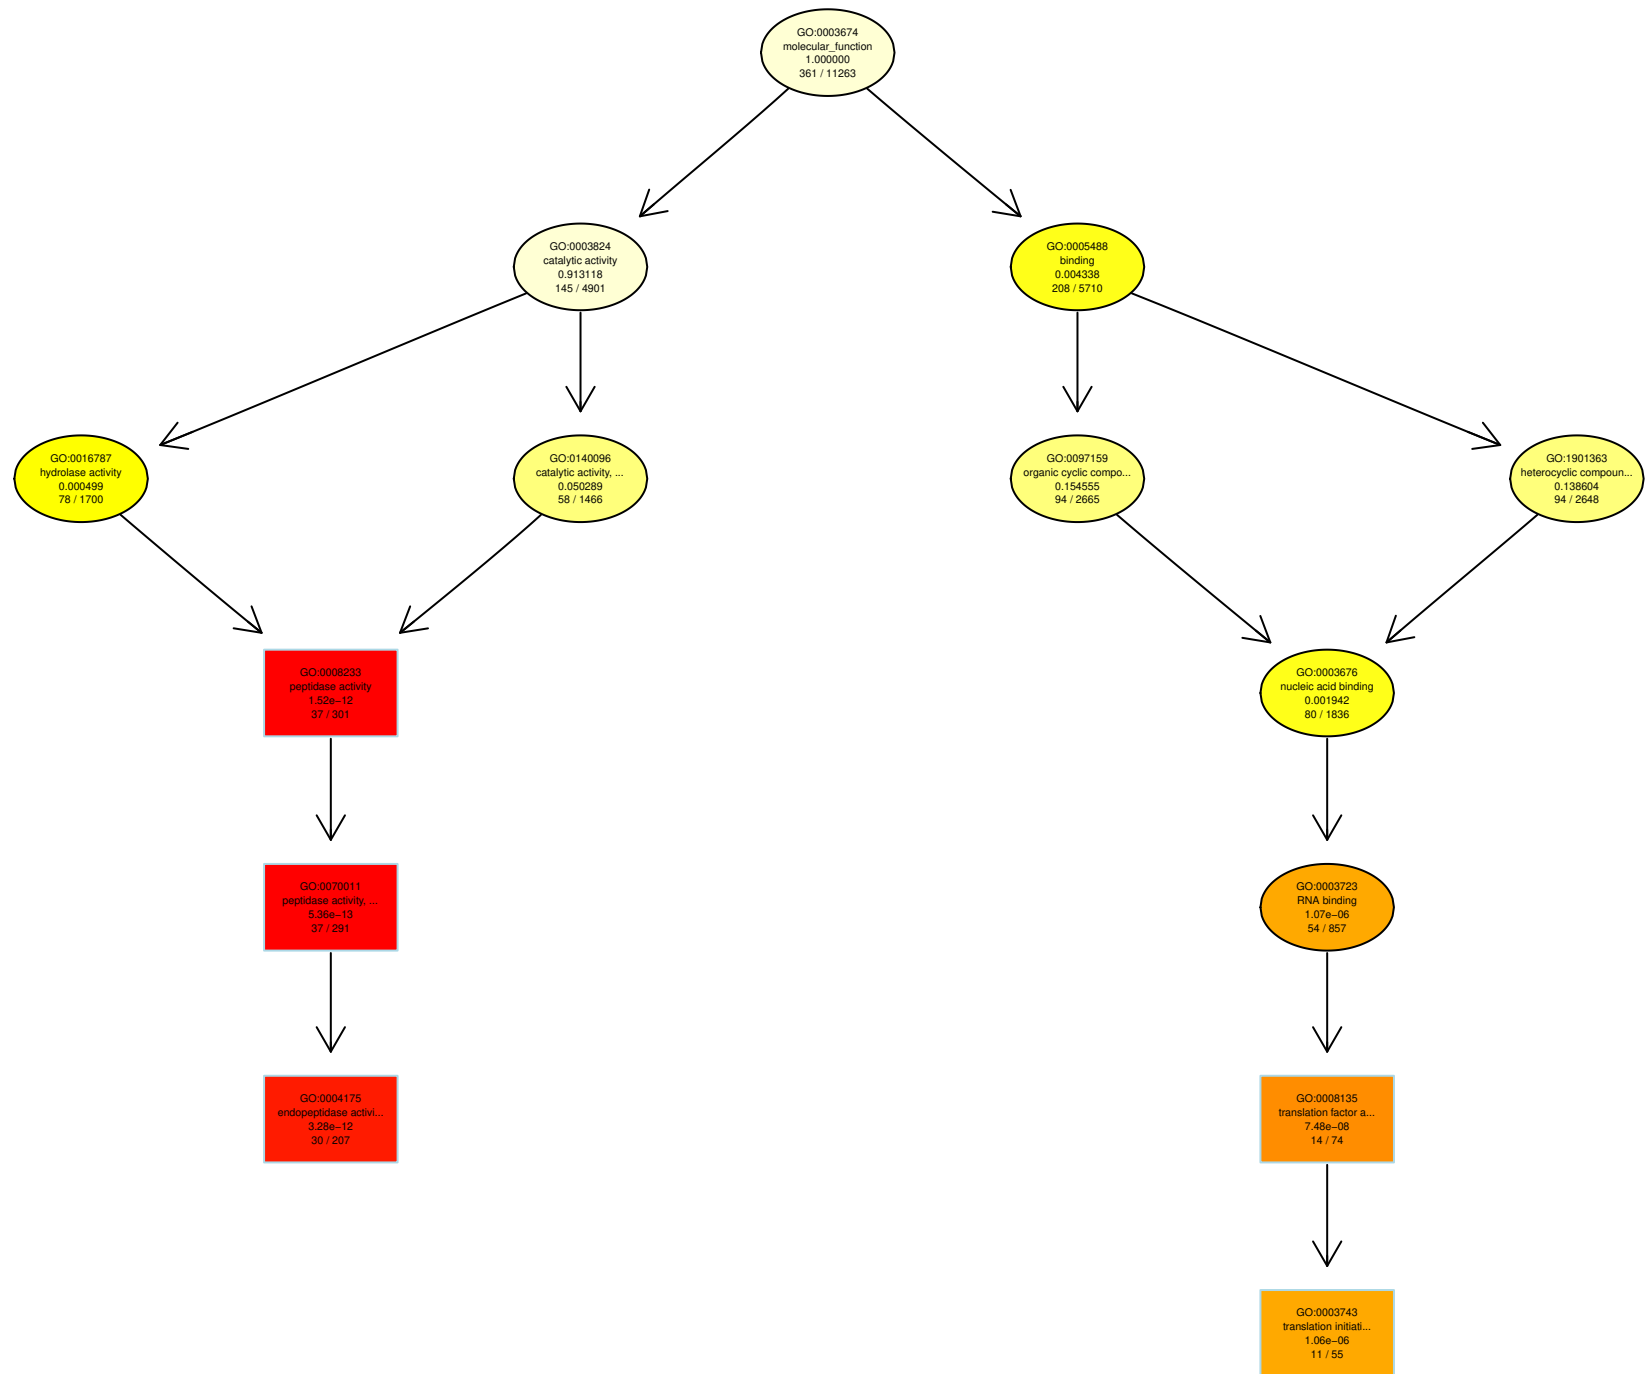

Supplement: PLD3-6-e396-s164.pdf [file PLD3-6-e396-s164.pdf]

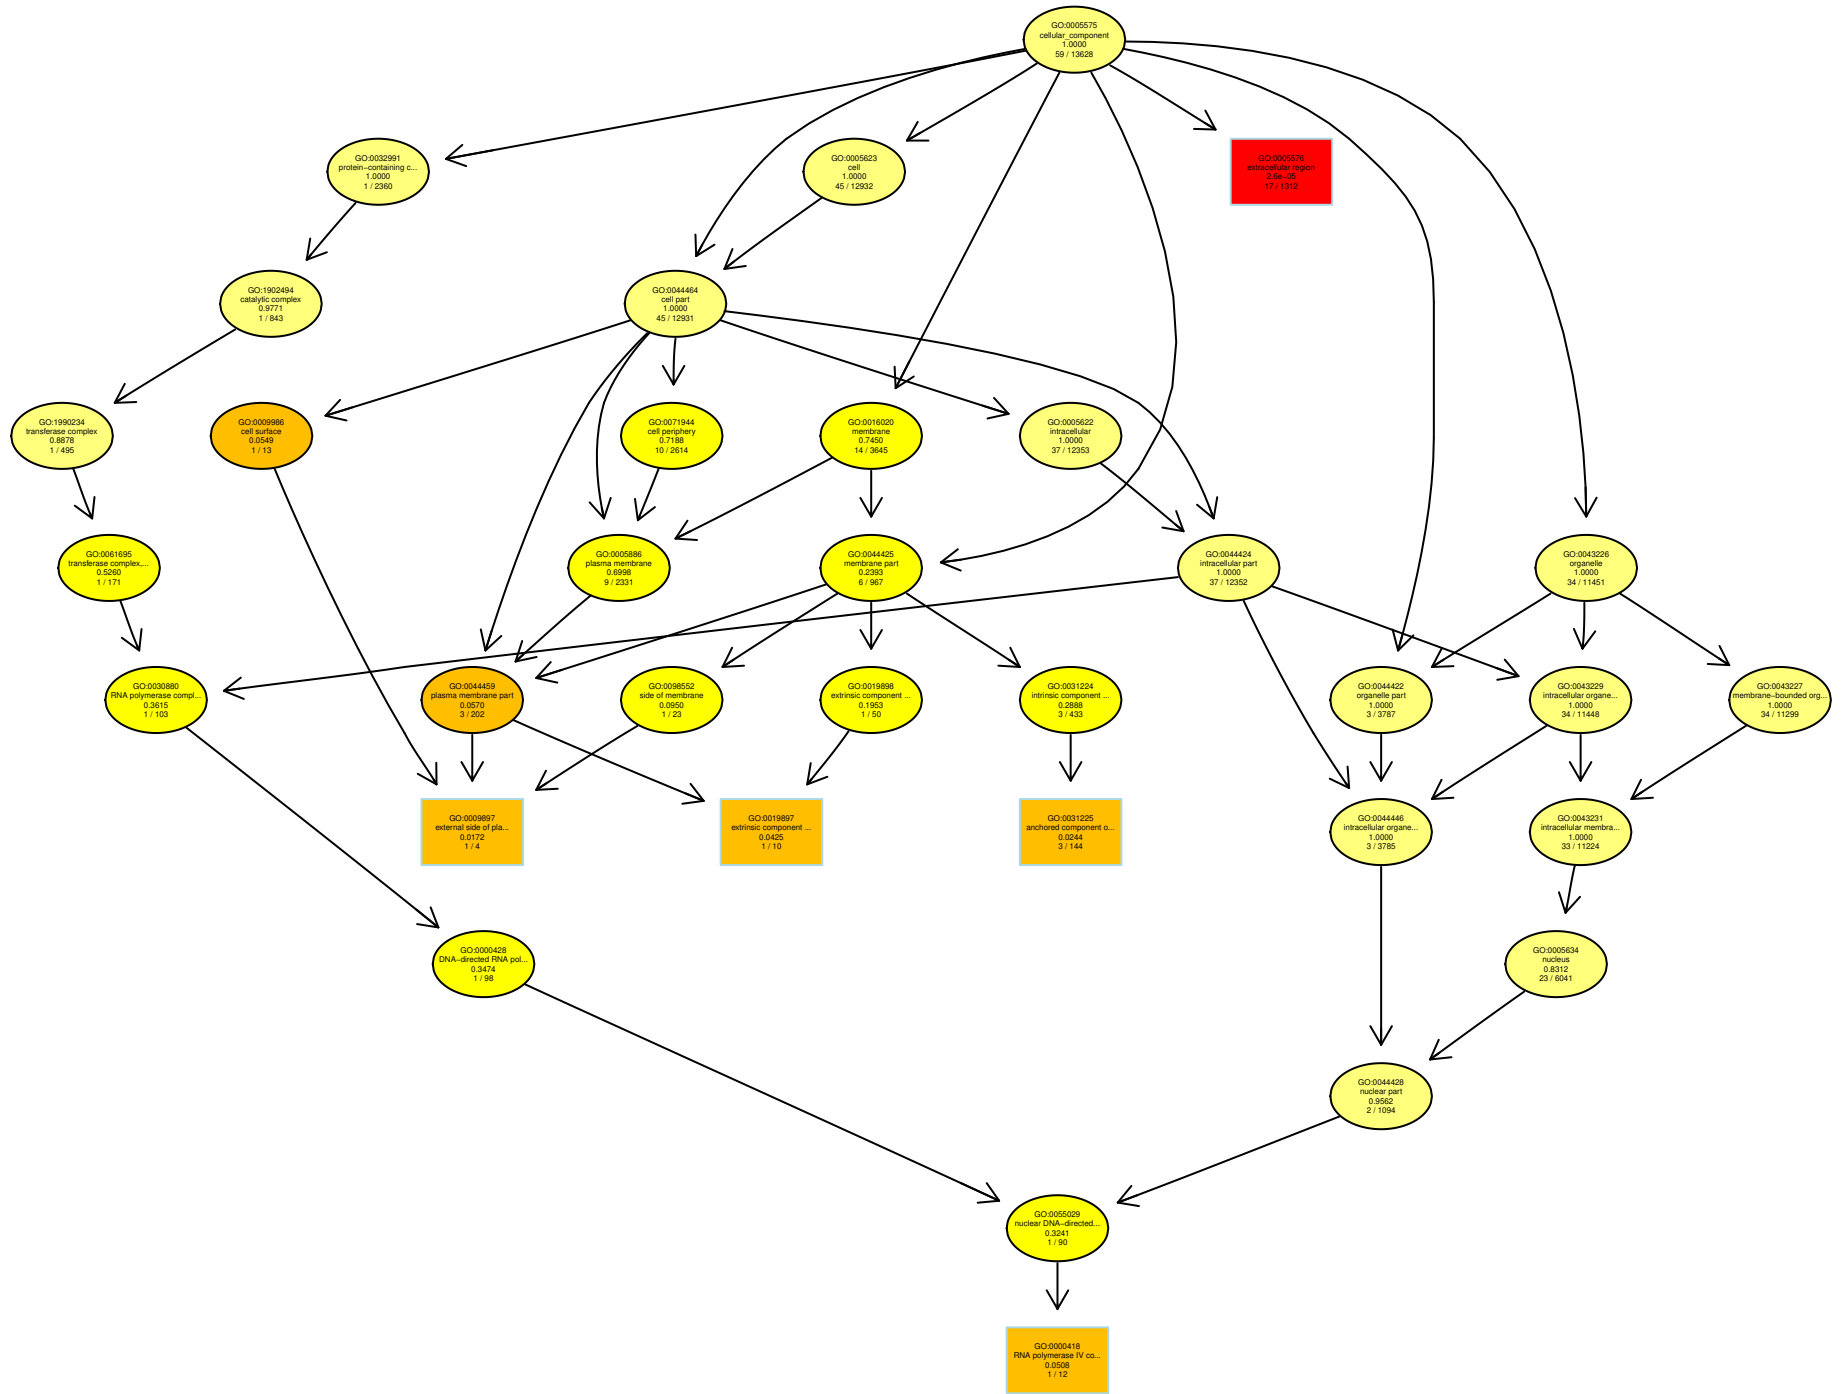

Supplement: PLD3-6-e396-s166.pdf [file PLD3-6-e396-s166.pdf]

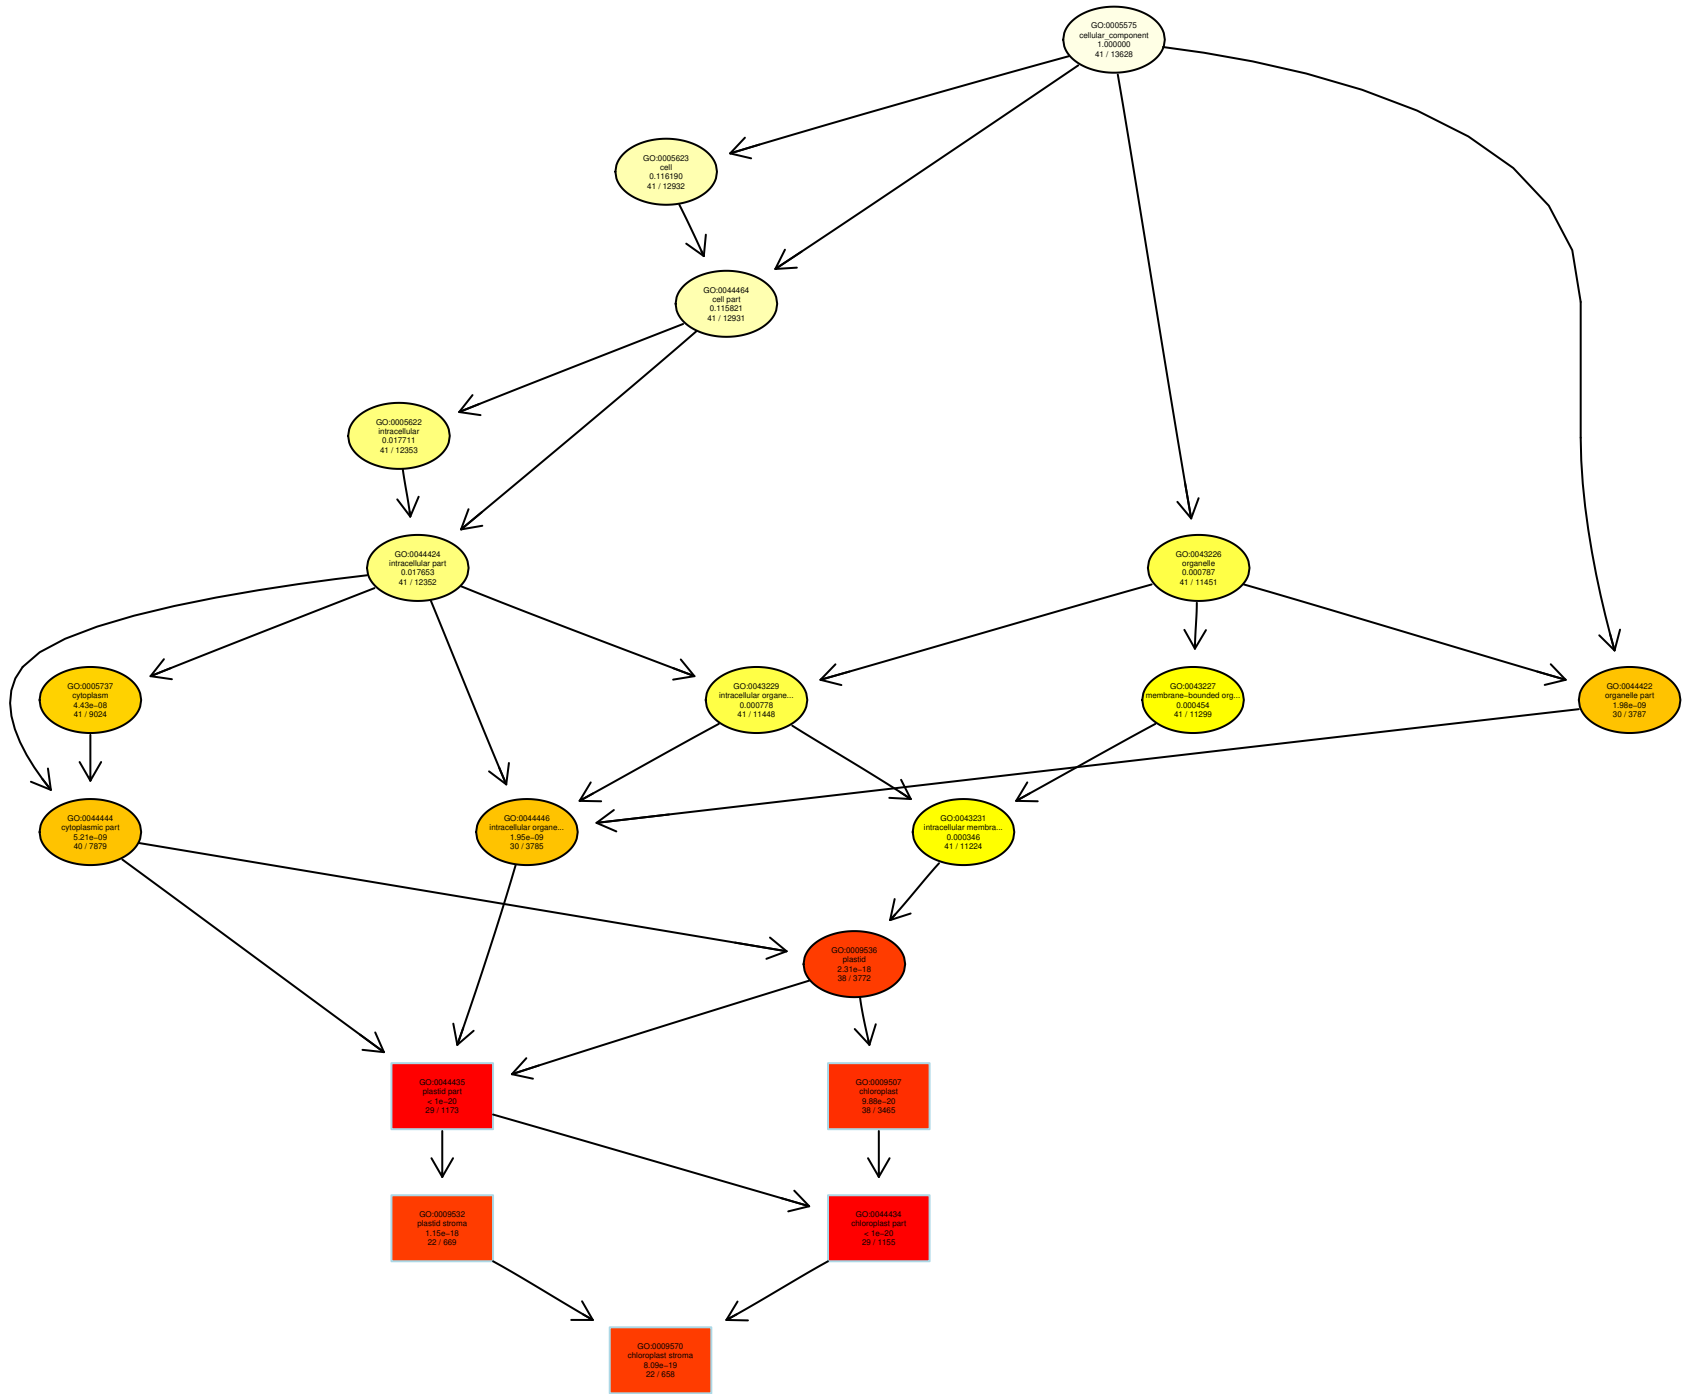

Supplement: PLD3-6-e396-s167.pdf [file PLD3-6-e396-s167.pdf]

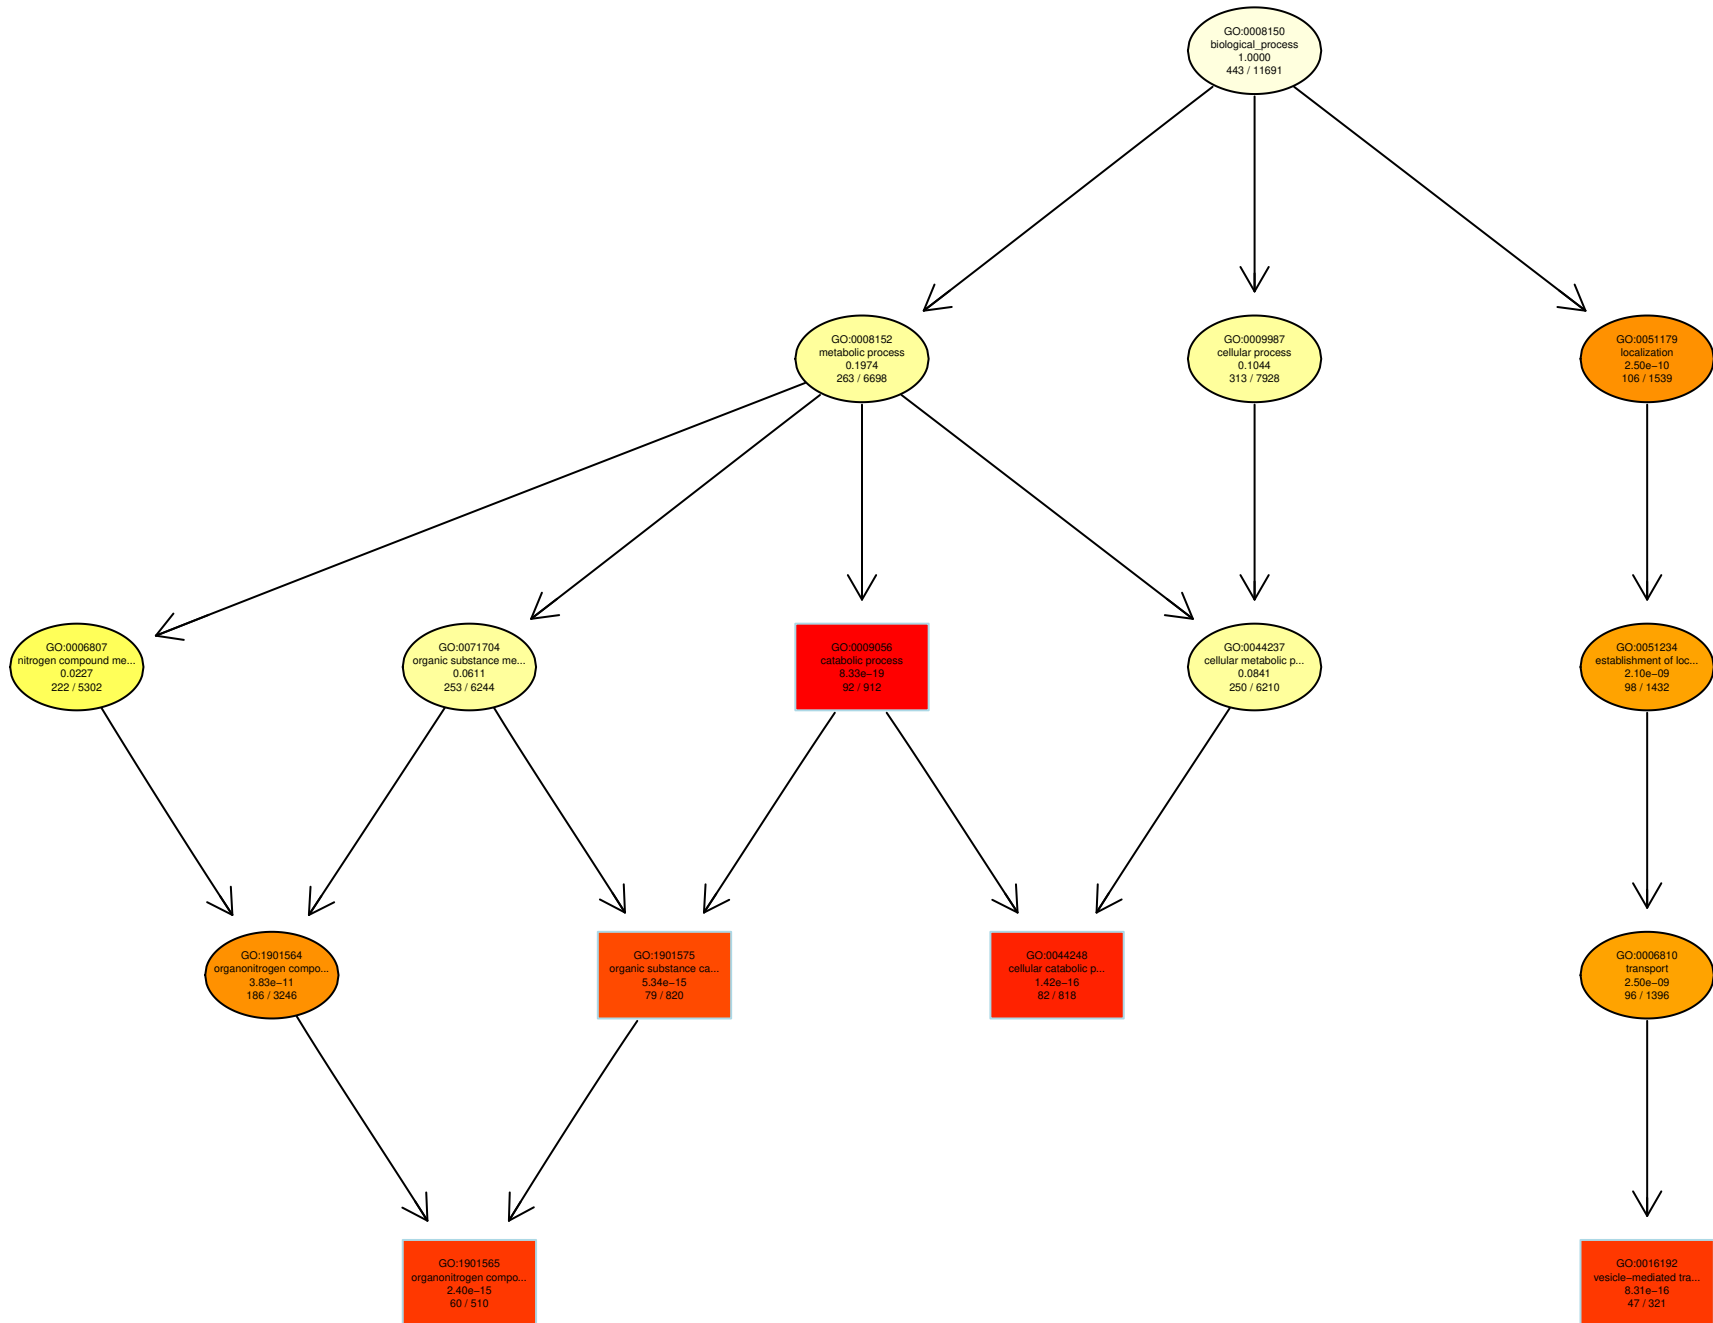

Supplement: PLD3-6-e396-s168.pdf [file PLD3-6-e396-s168.pdf]

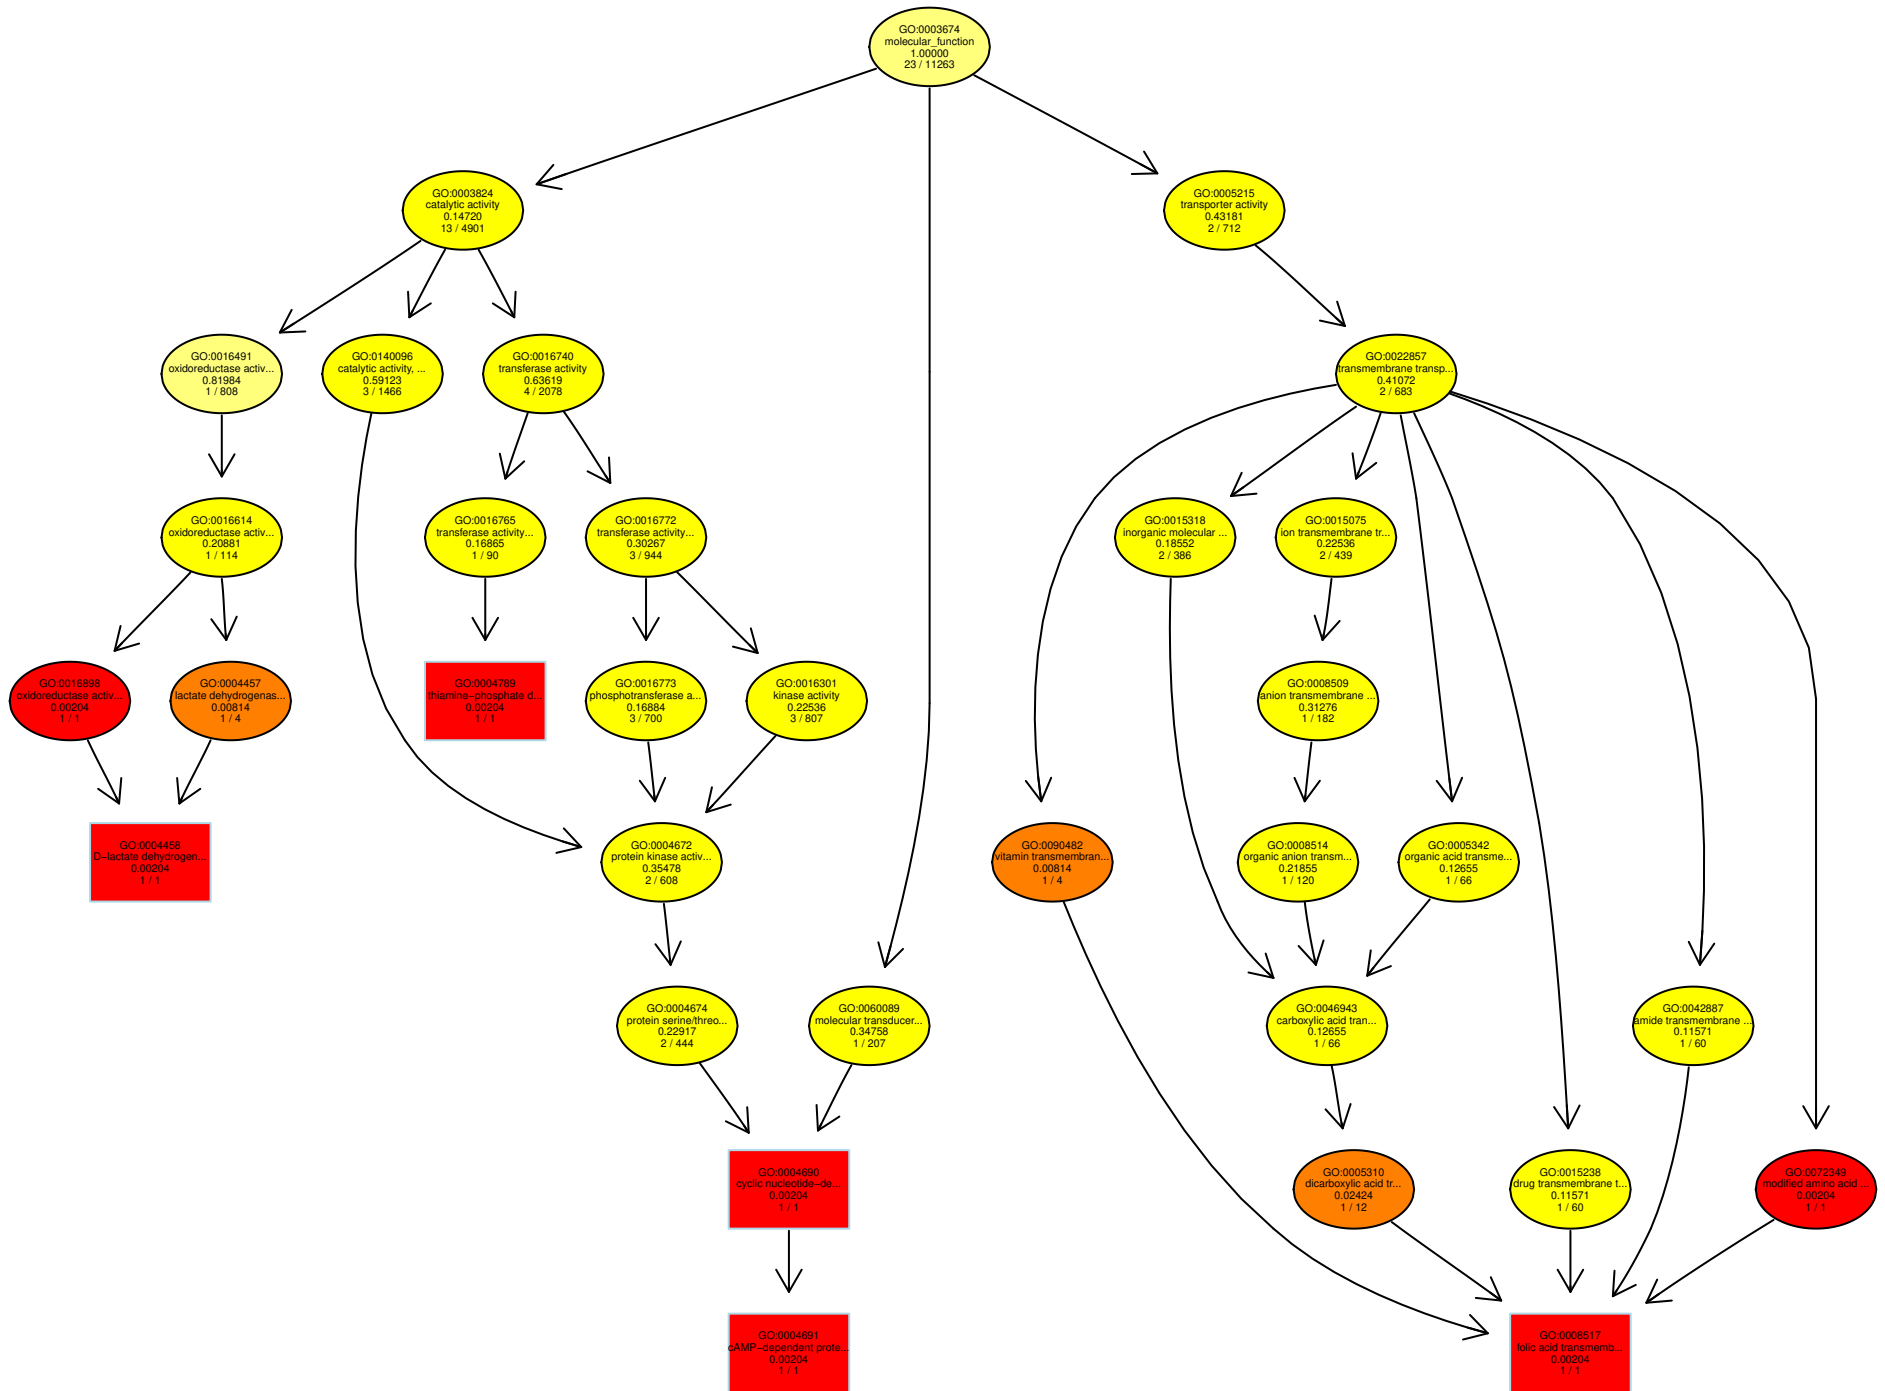

Supplement: PLD3-6-e396-s174.pdf [file PLD3-6-e396-s174.pdf]

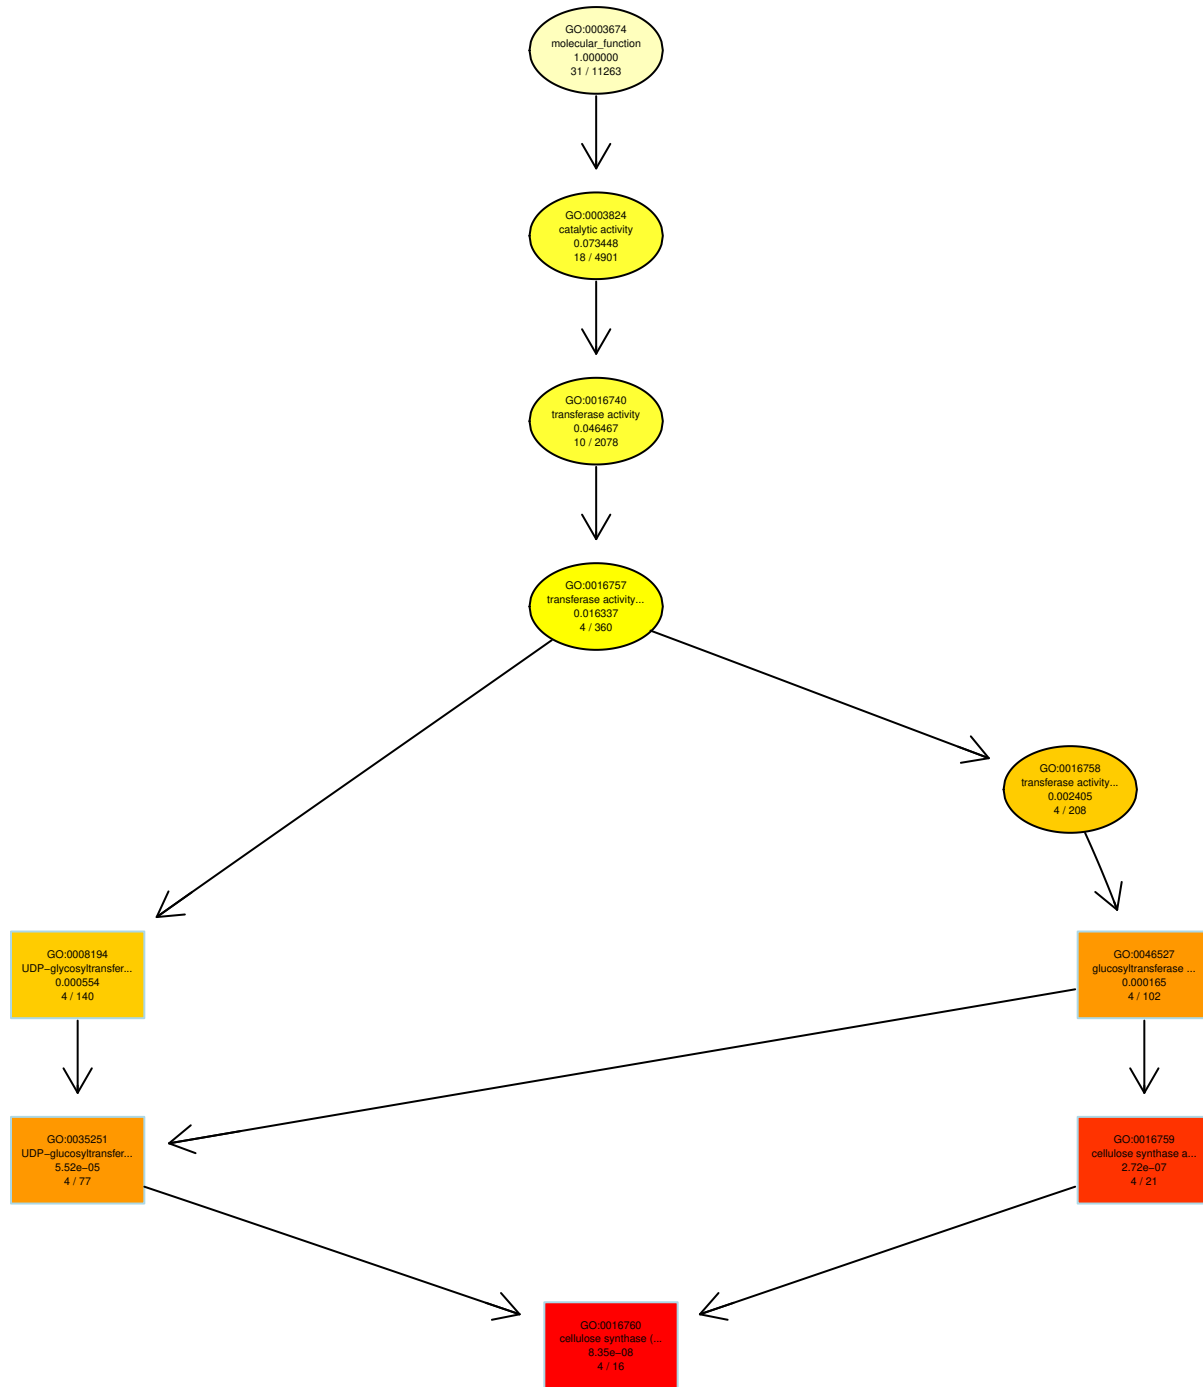

Supplement: PLD3-6-e396-s175.pdf [file PLD3-6-e396-s175.pdf]

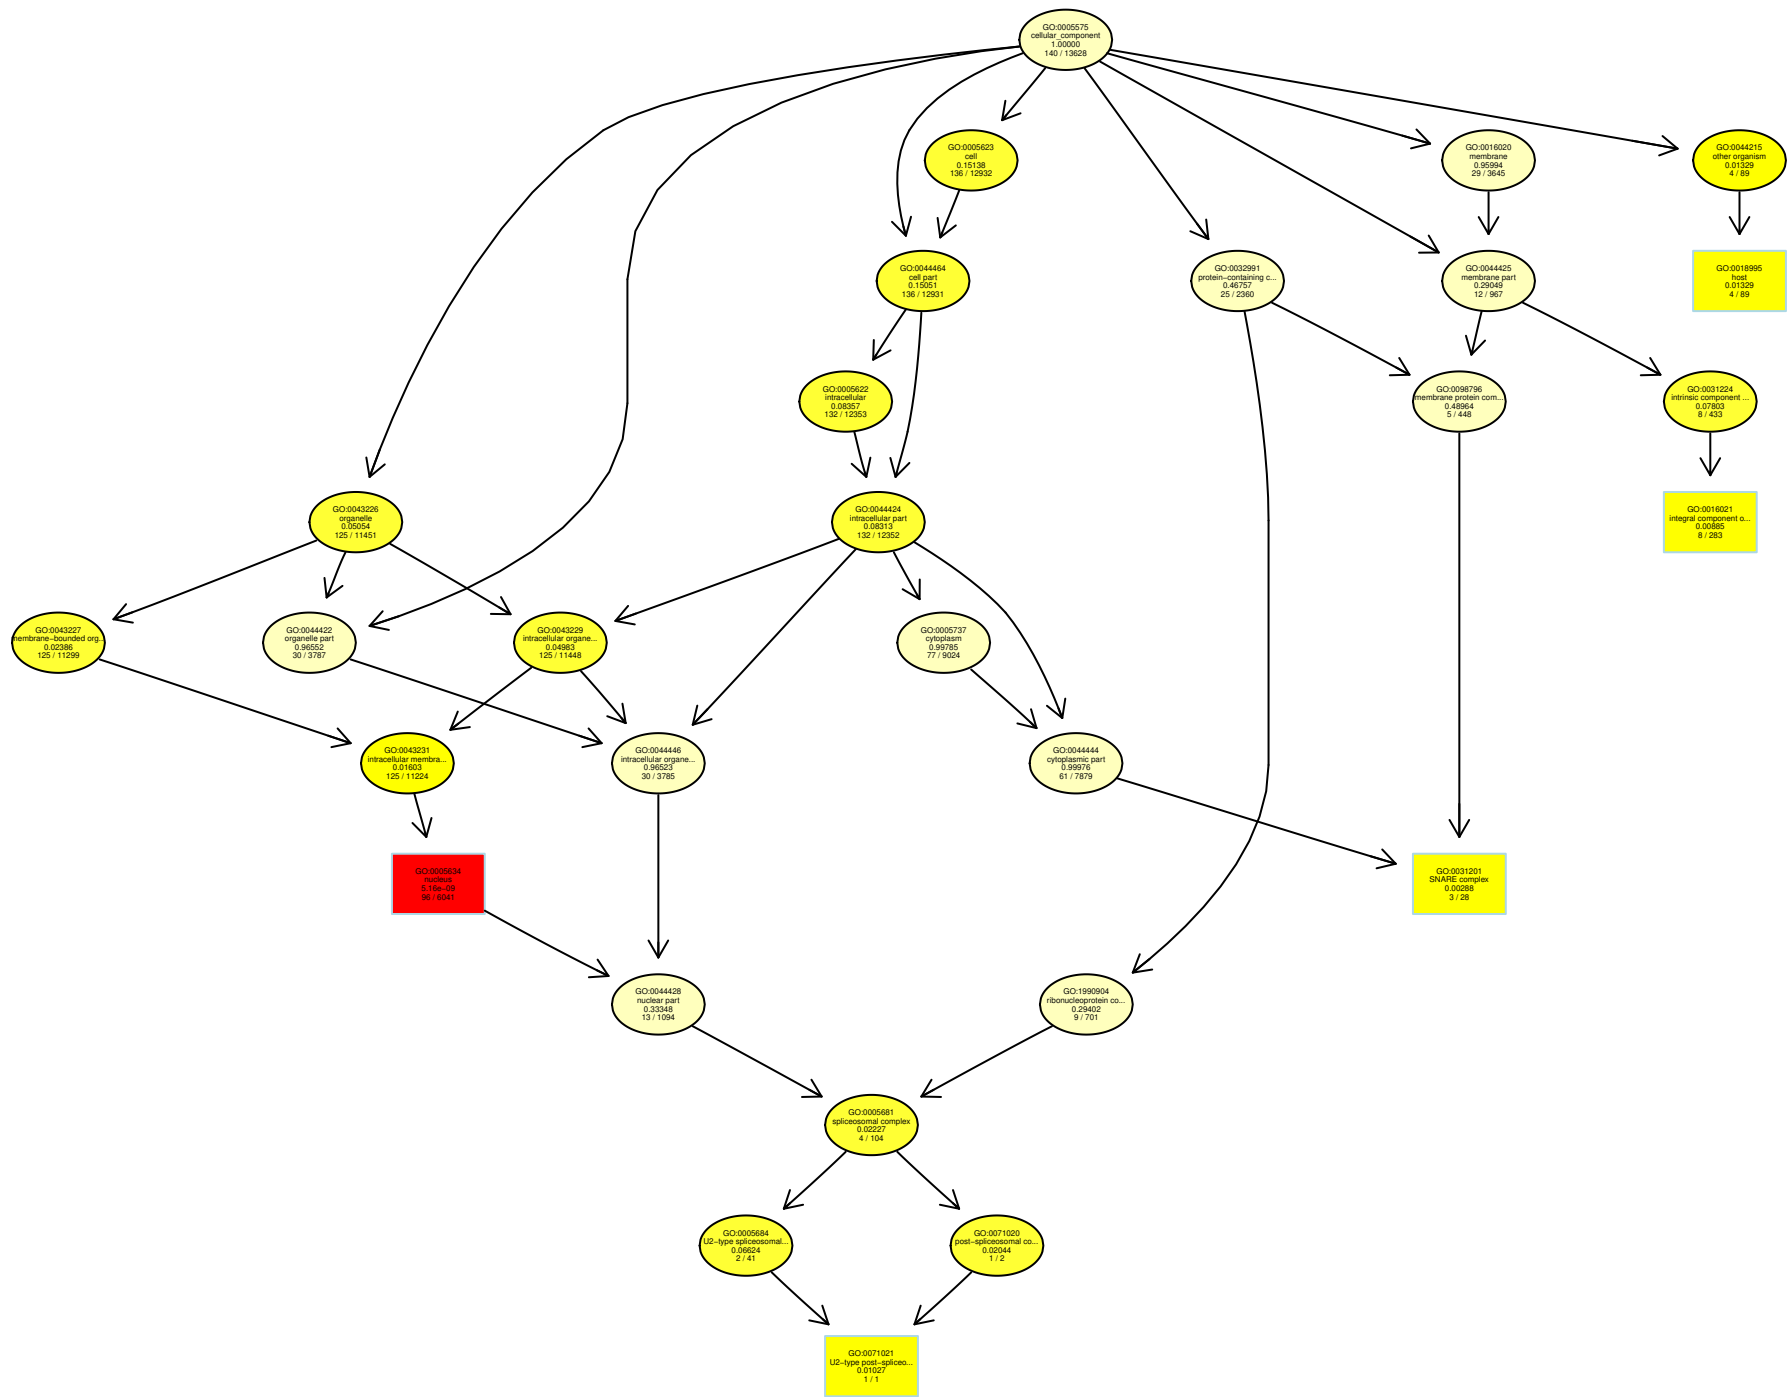

Supplement: PLD3-6-e396-s179.pdf [file PLD3-6-e396-s179.pdf]

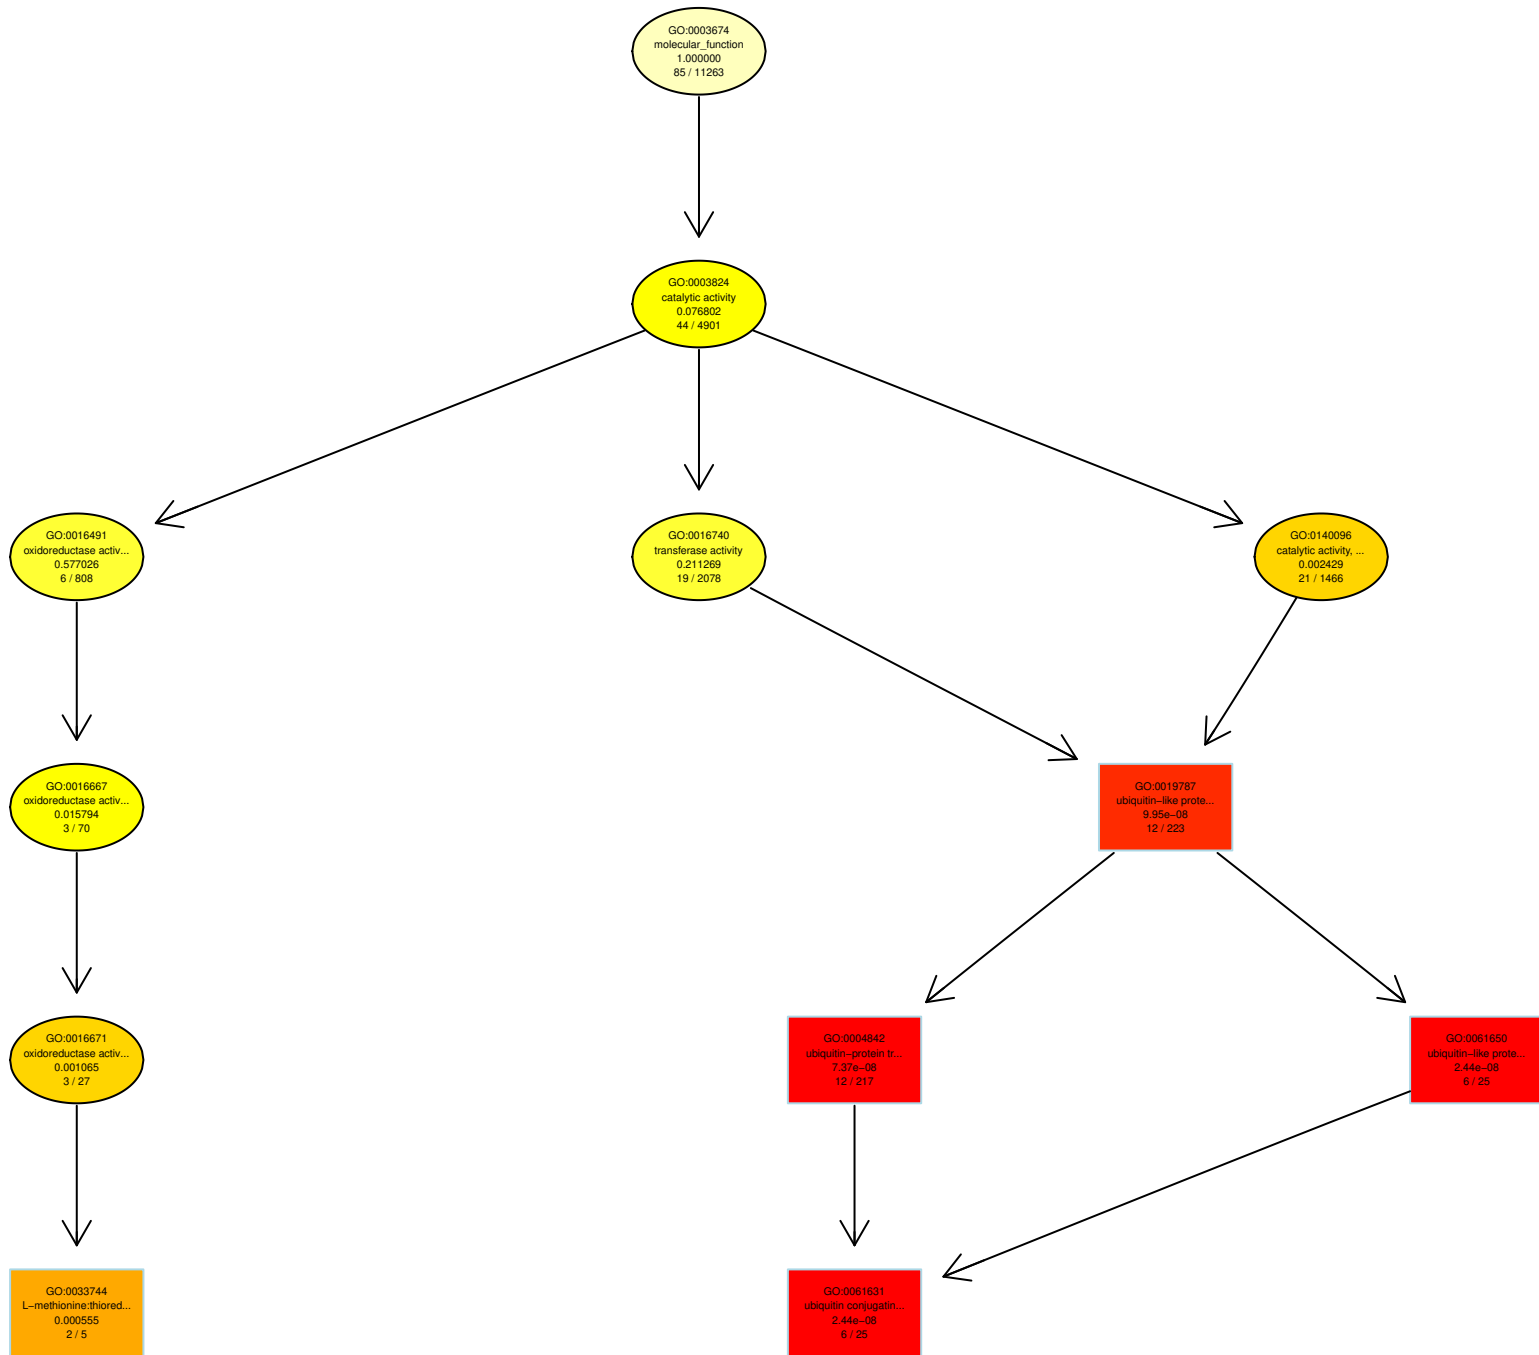

Supplement: PLD3-6-e396-s183.pdf [file PLD3-6-e396-s183.pdf]

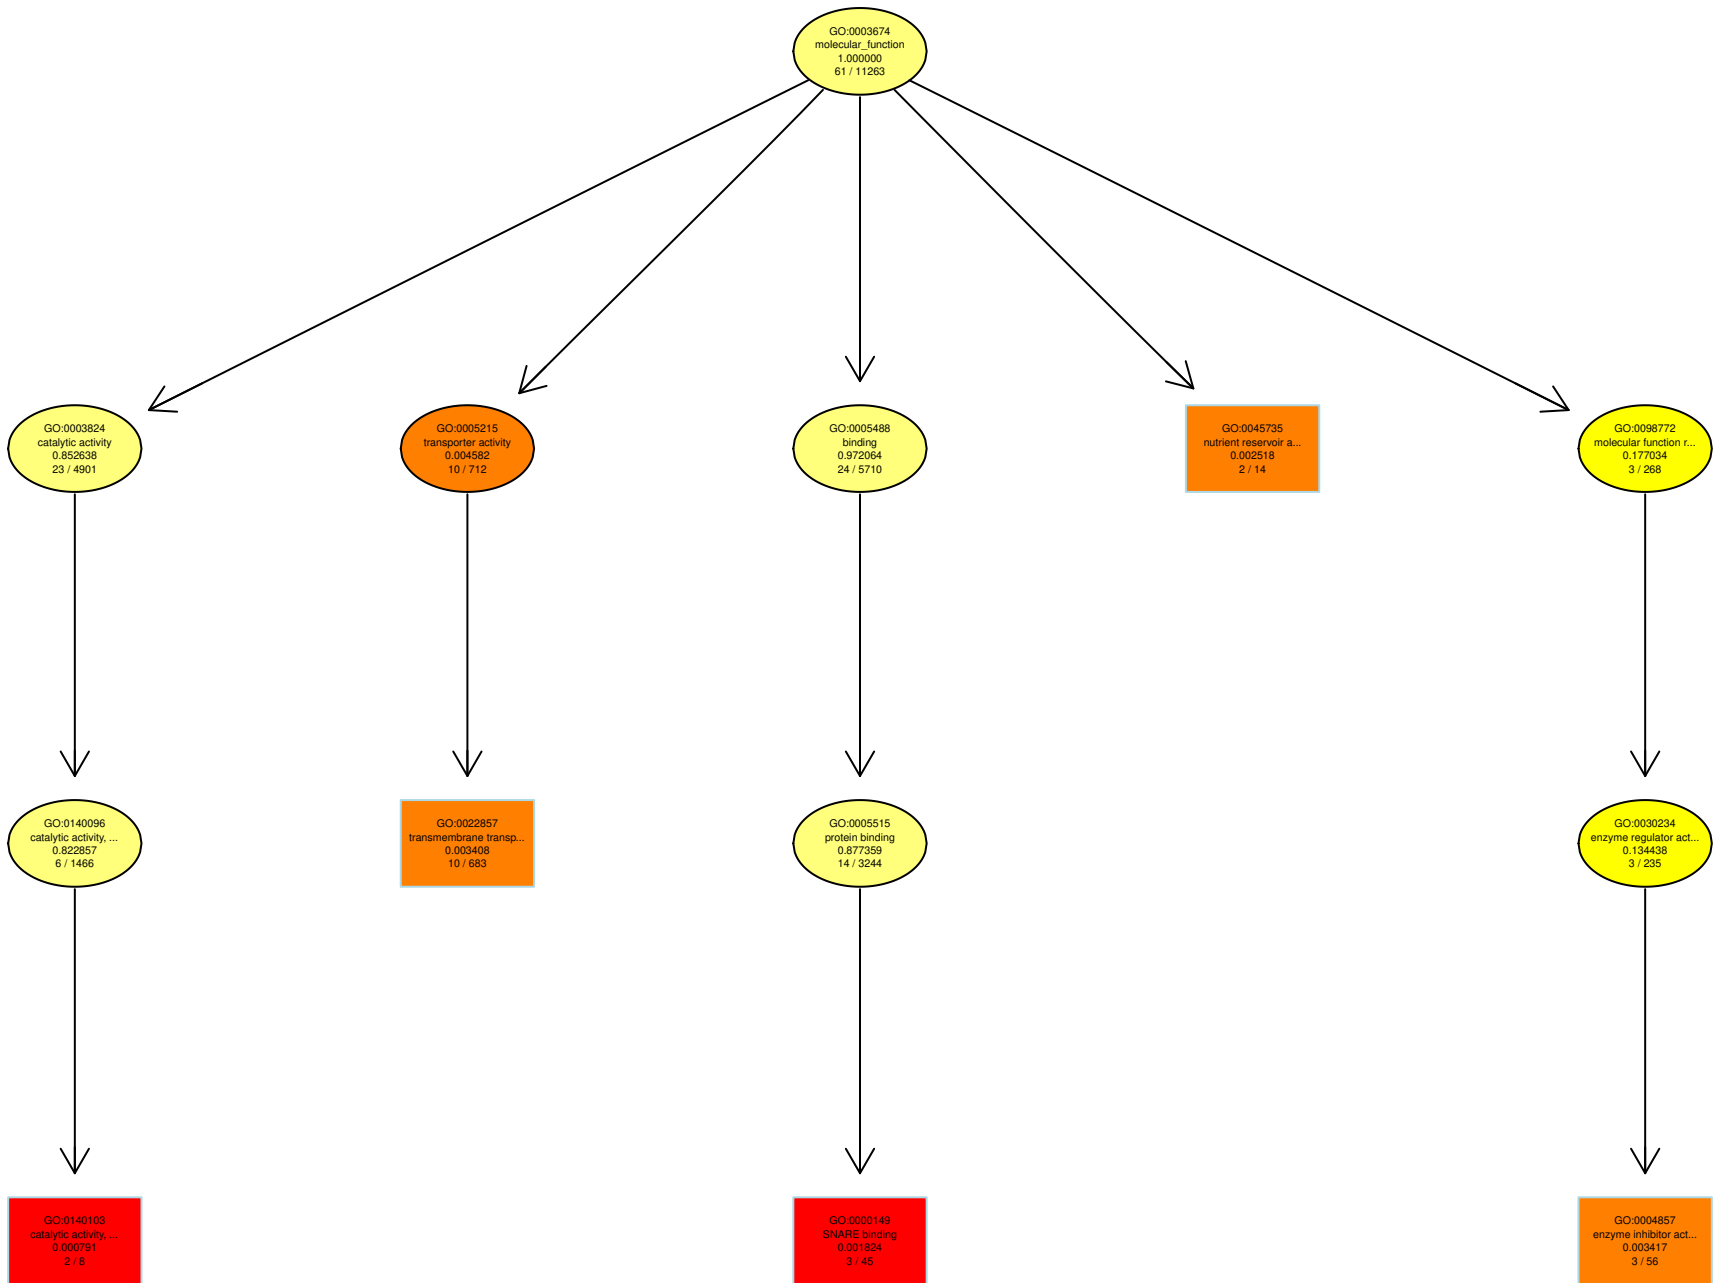

Supplement: PLD3-6-e396-s188.pdf [file PLD3-6-e396-s188.pdf]

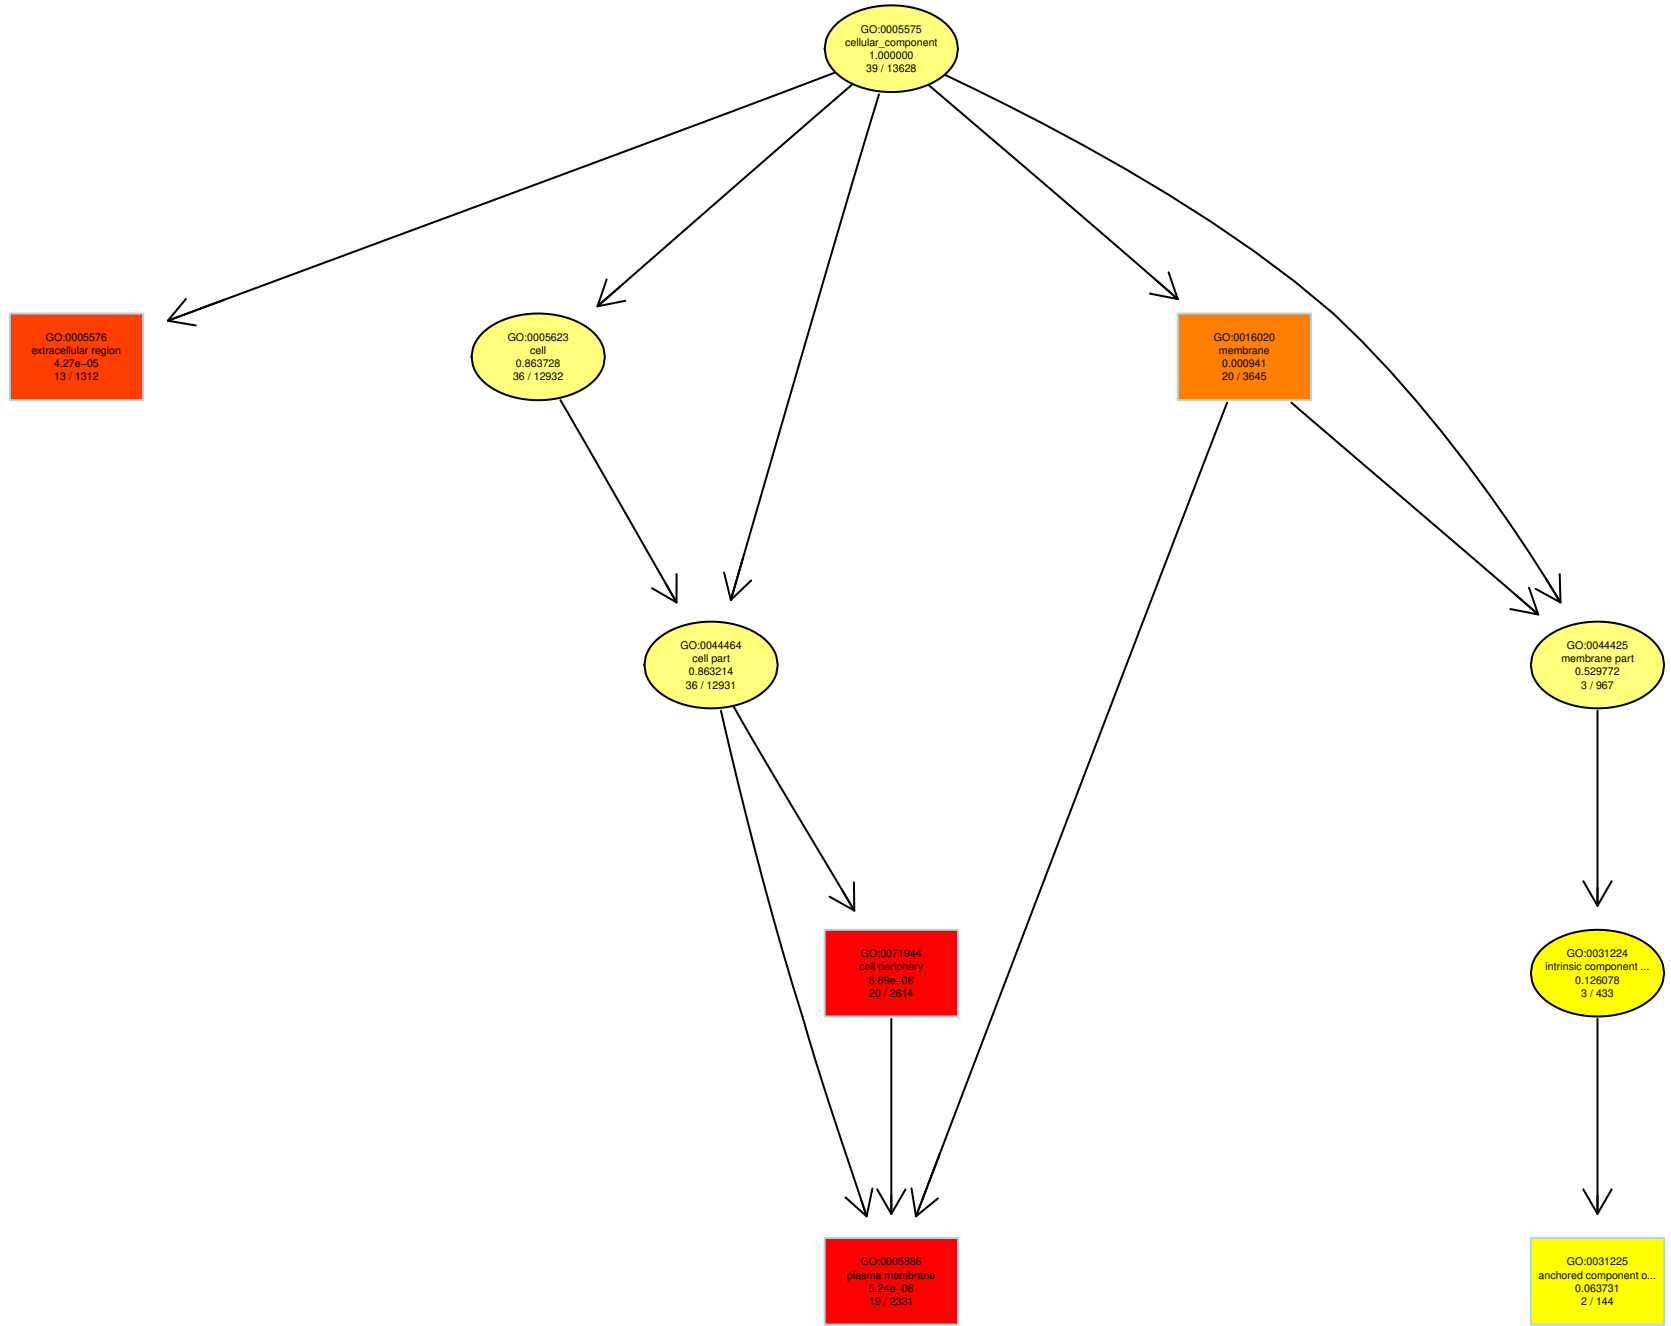

Supplement: PLD3-6-e396-s192.pdf [file PLD3-6-e396-s192.pdf]

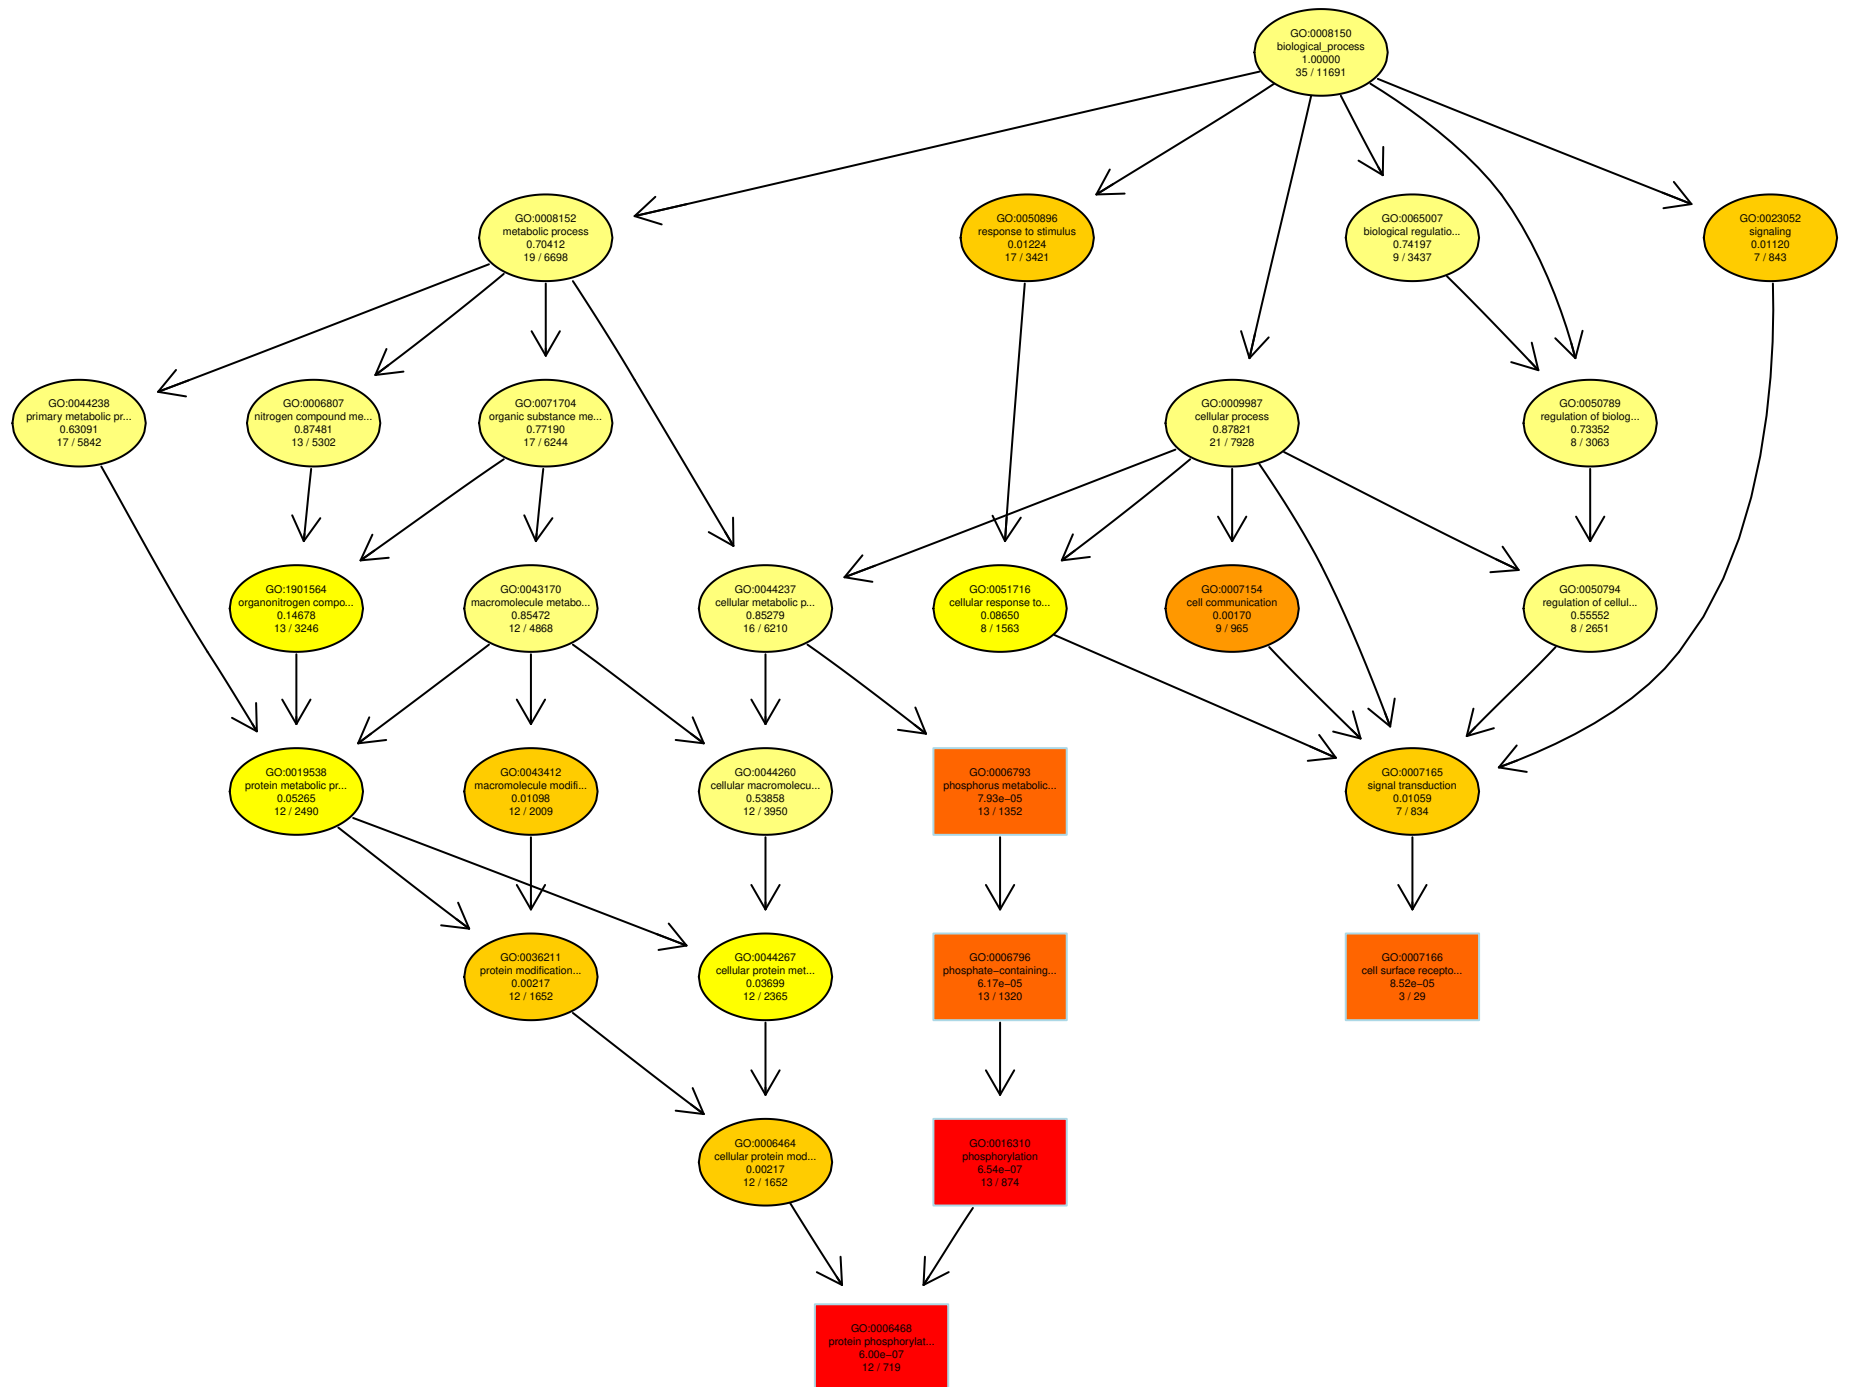

Supplement: PLD3-6-e396-s193.pdf [file PLD3-6-e396-s193.pdf]

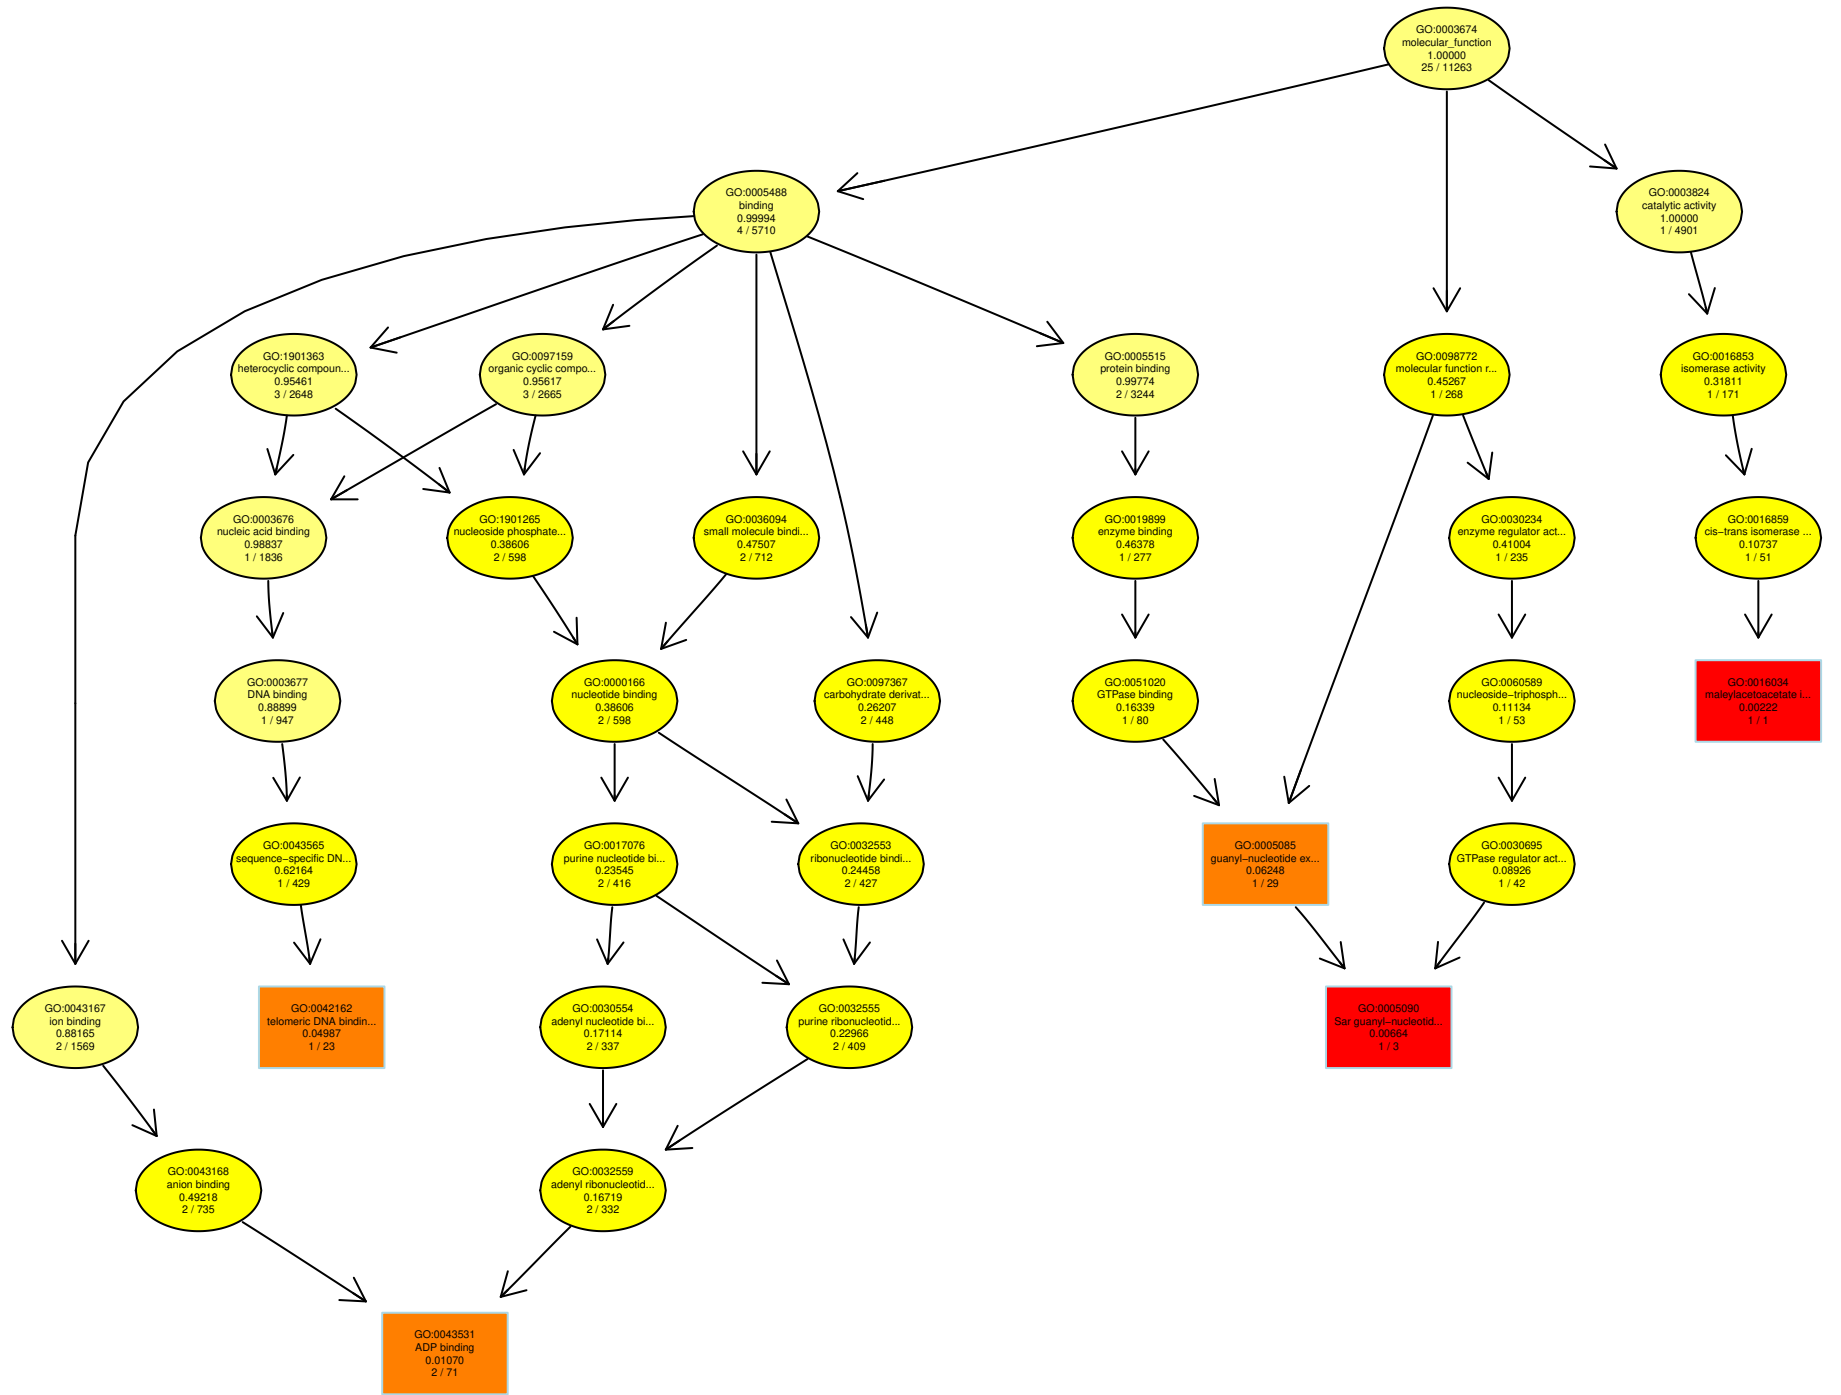

Supplement: PLD3-6-e396-s195.pdf [file PLD3-6-e396-s195.pdf]

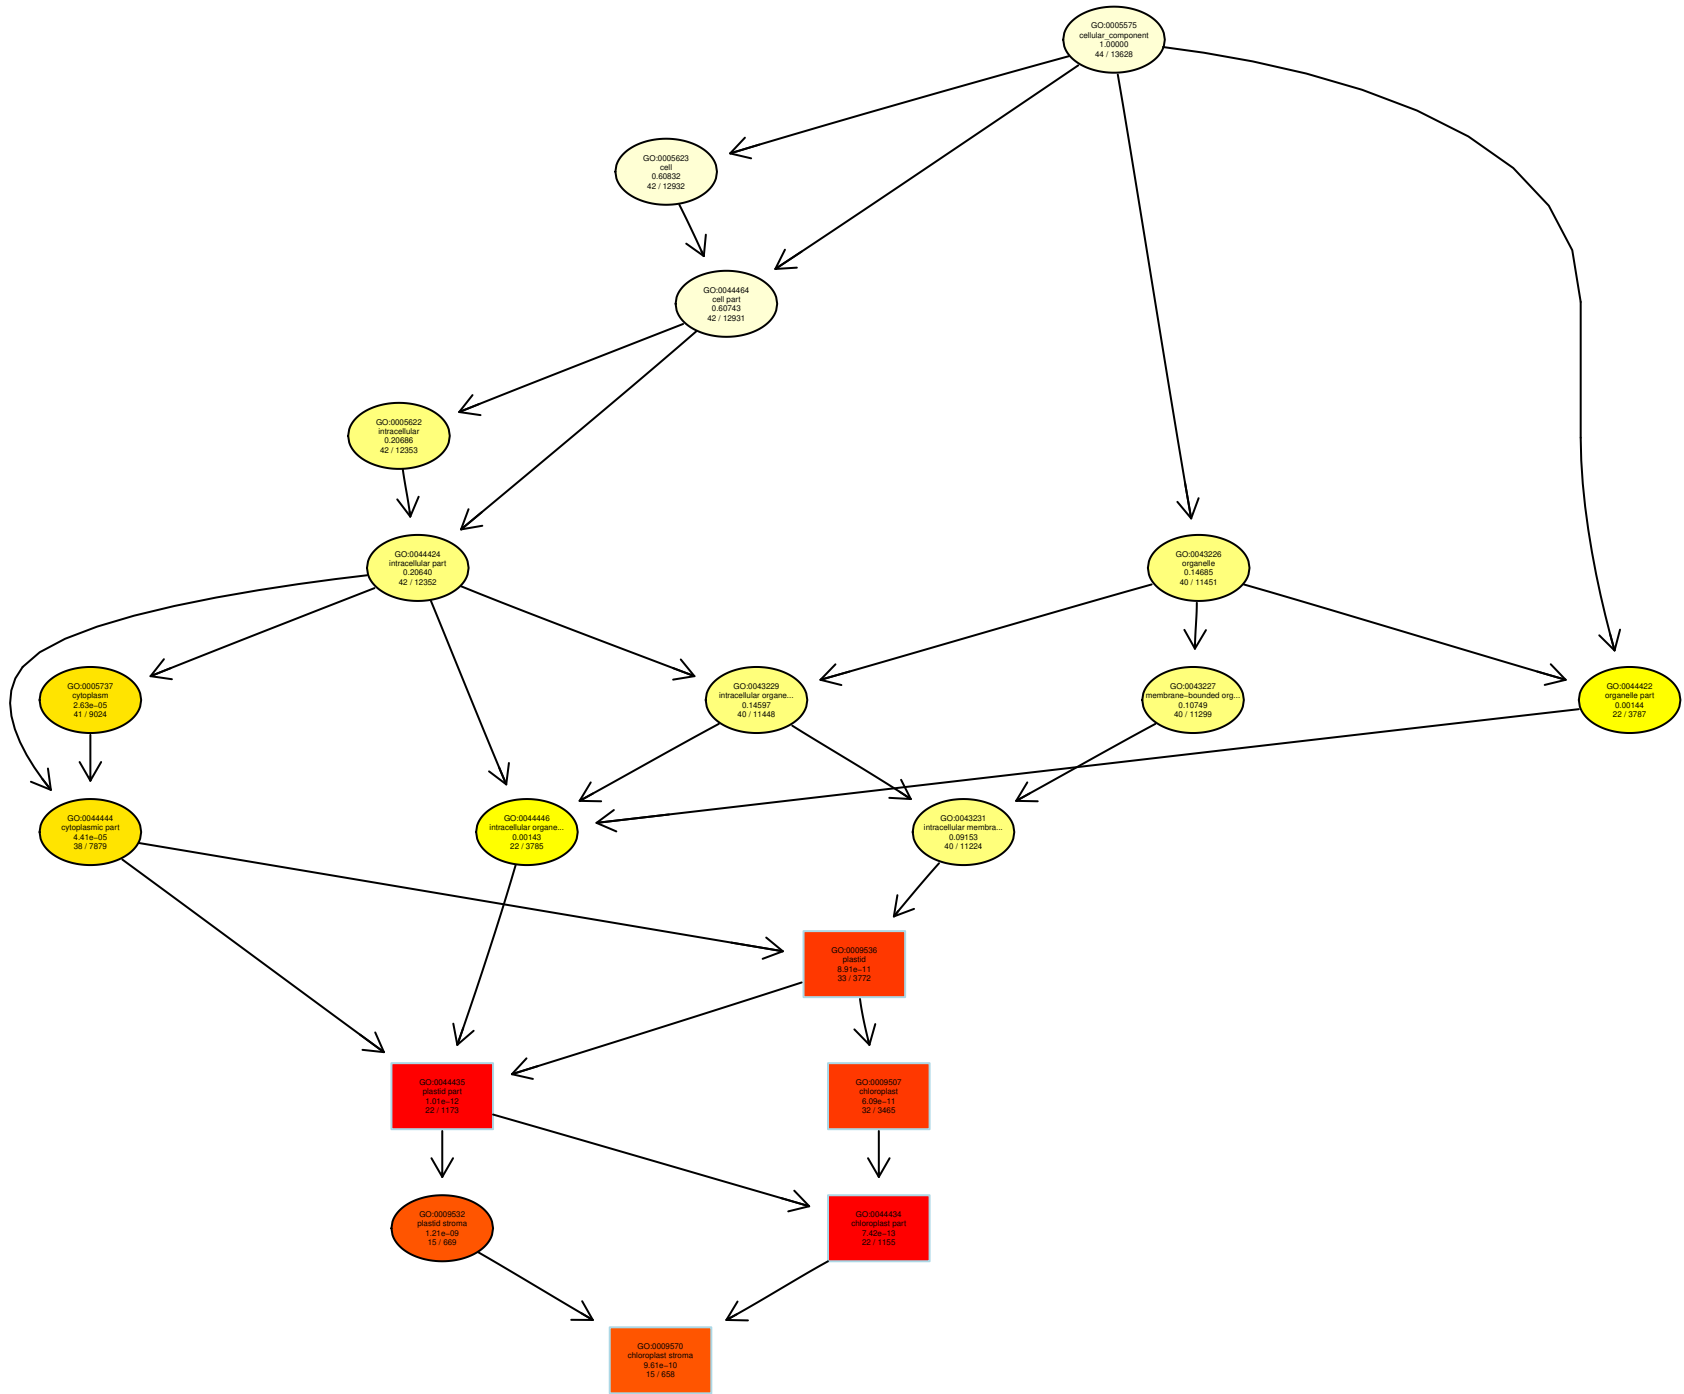

Supplement: PLD3-6-e396-s197.pdf [file PLD3-6-e396-s197.pdf]

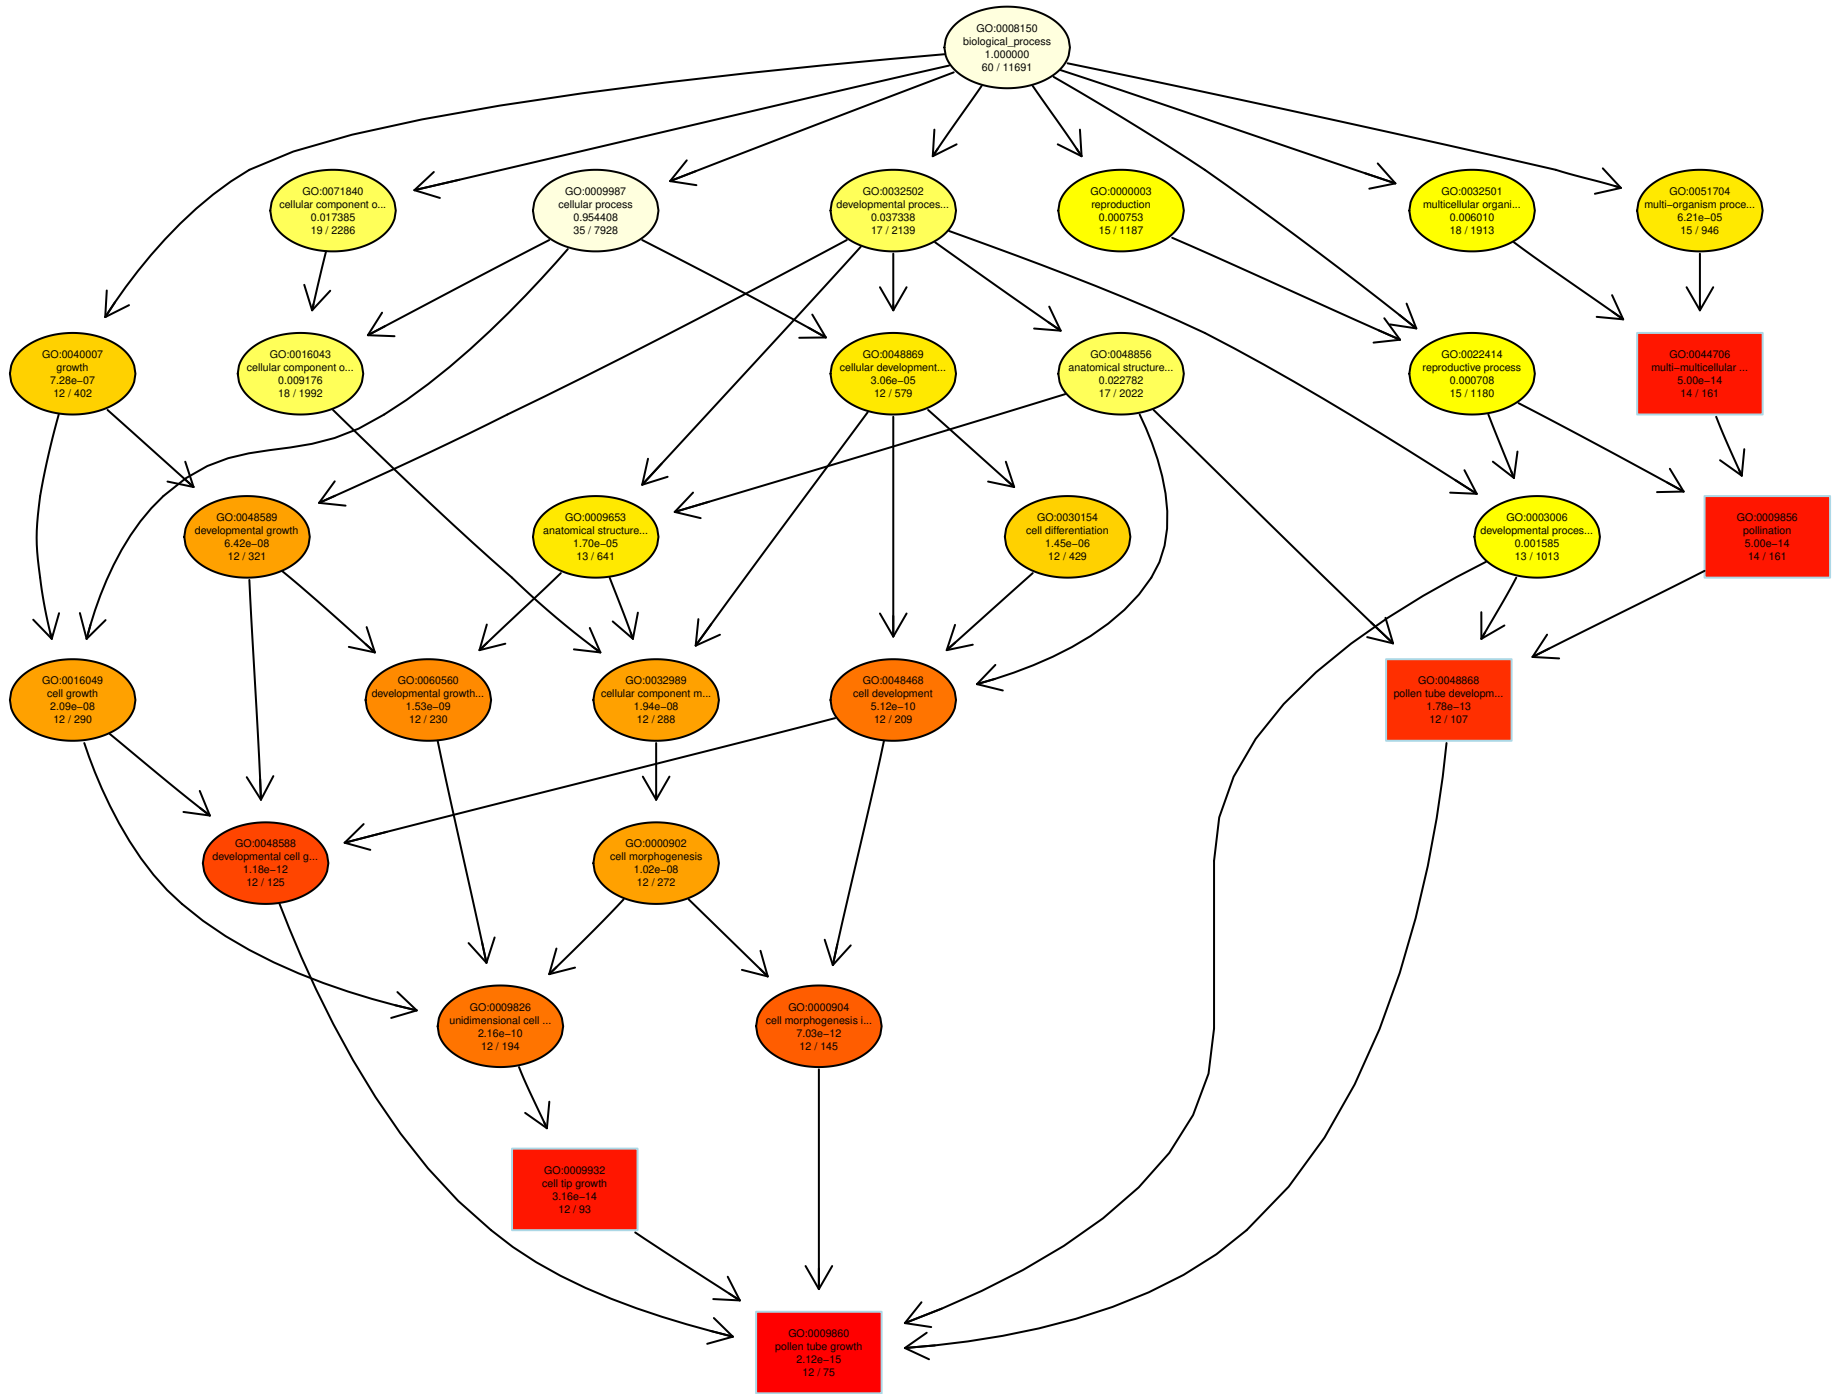

Supplement: PLD3-6-e396-s200.pdf [file PLD3-6-e396-s200.pdf]

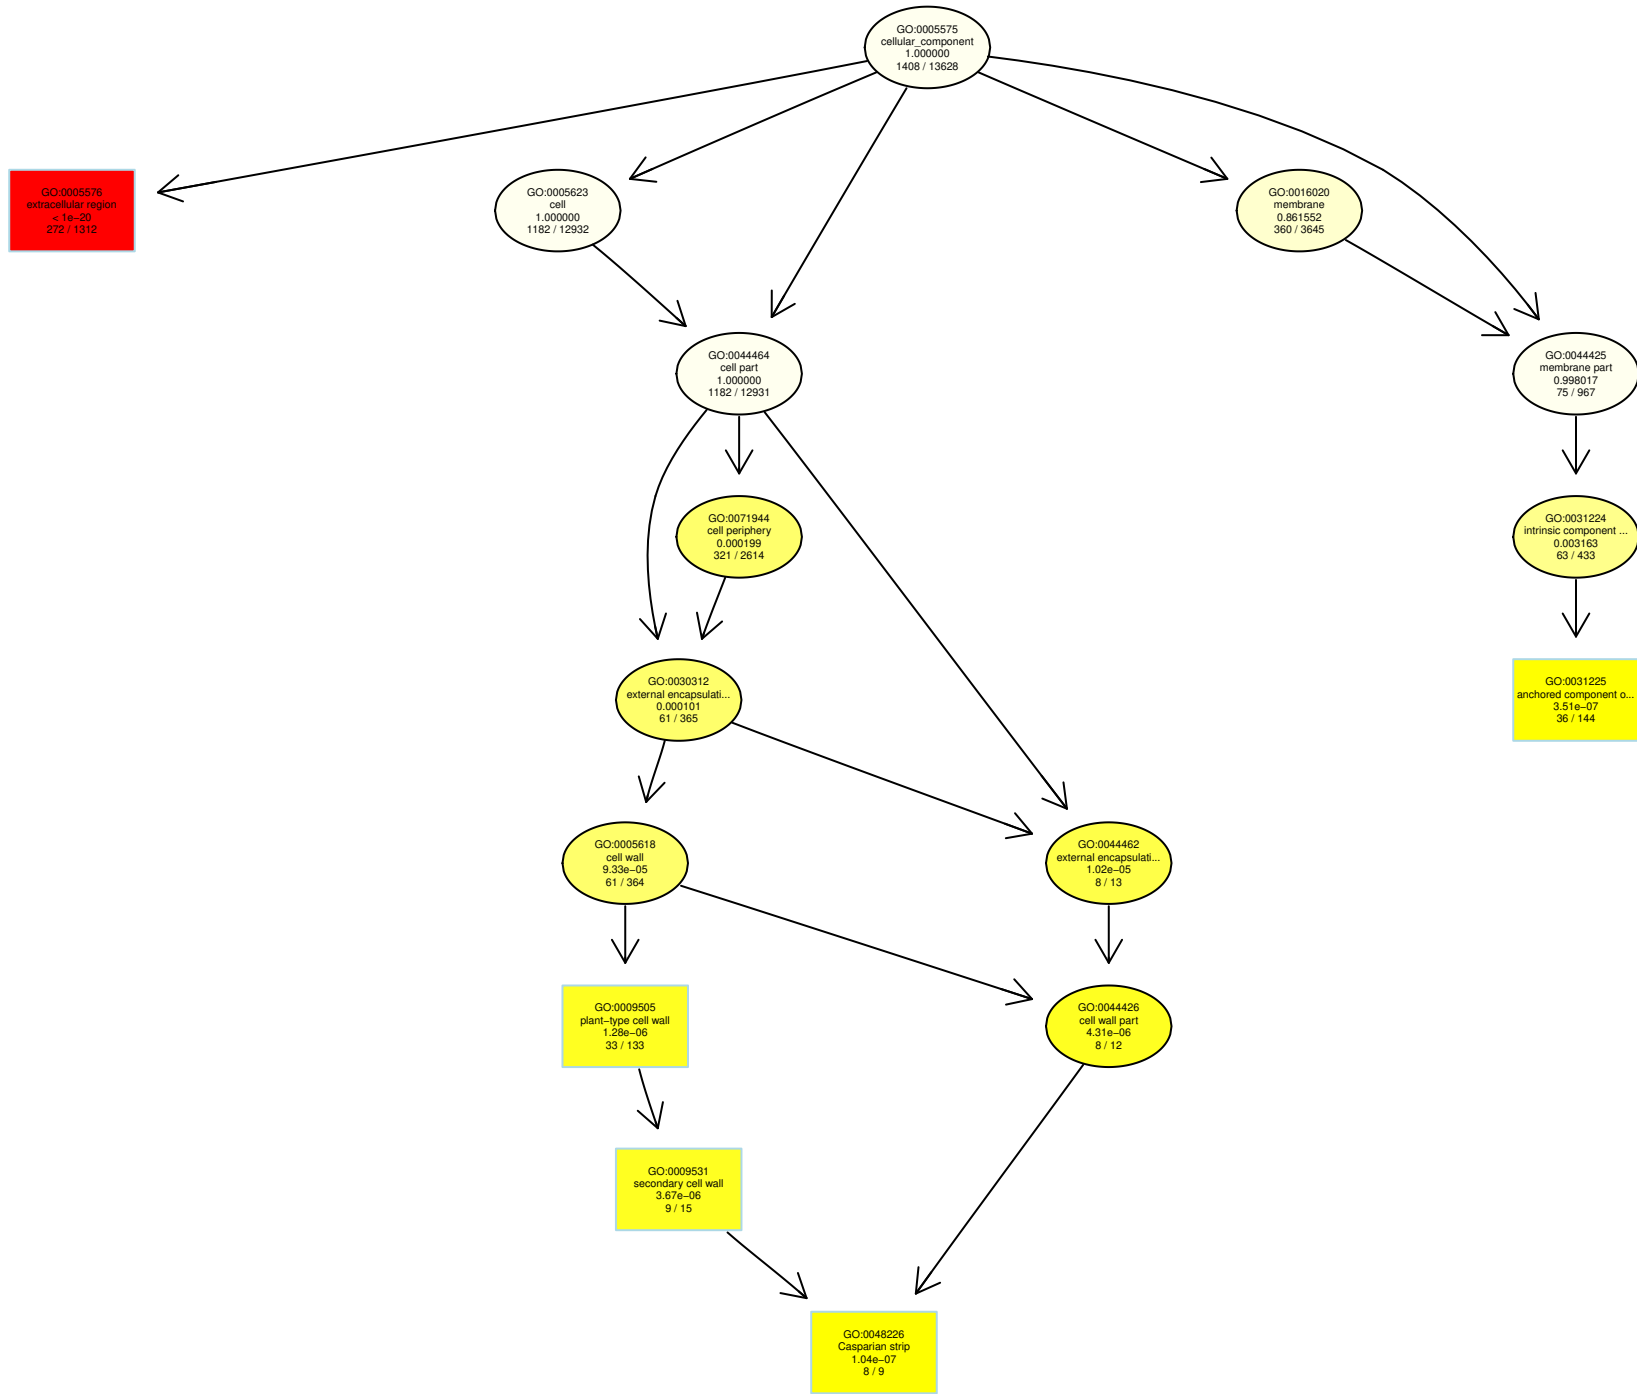

Supplement: PLD3-6-e396-s203.pdf [file PLD3-6-e396-s203.pdf]

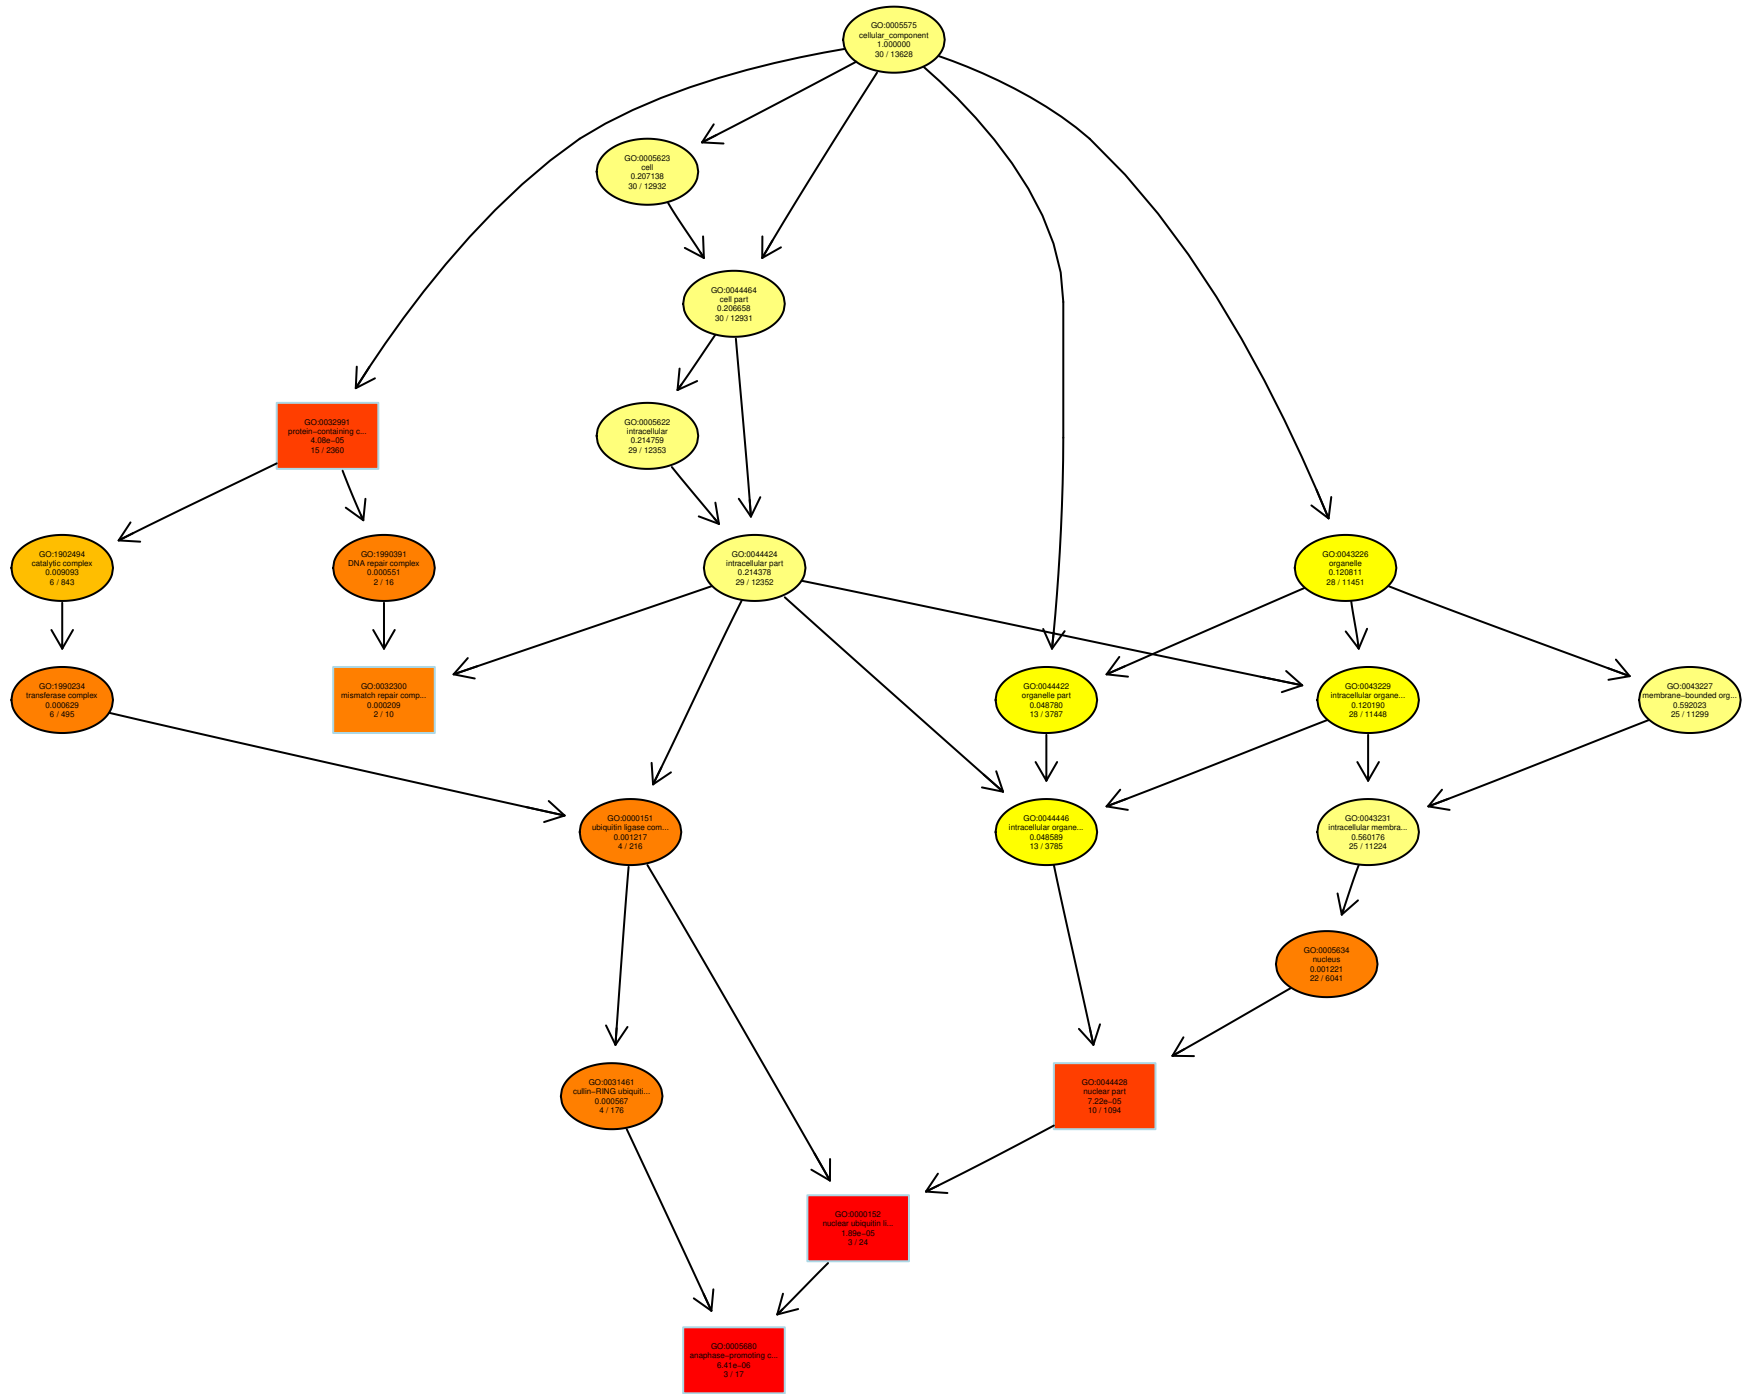

Supplement: PLD3-6-e396-s204.pdf [file PLD3-6-e396-s204.pdf]

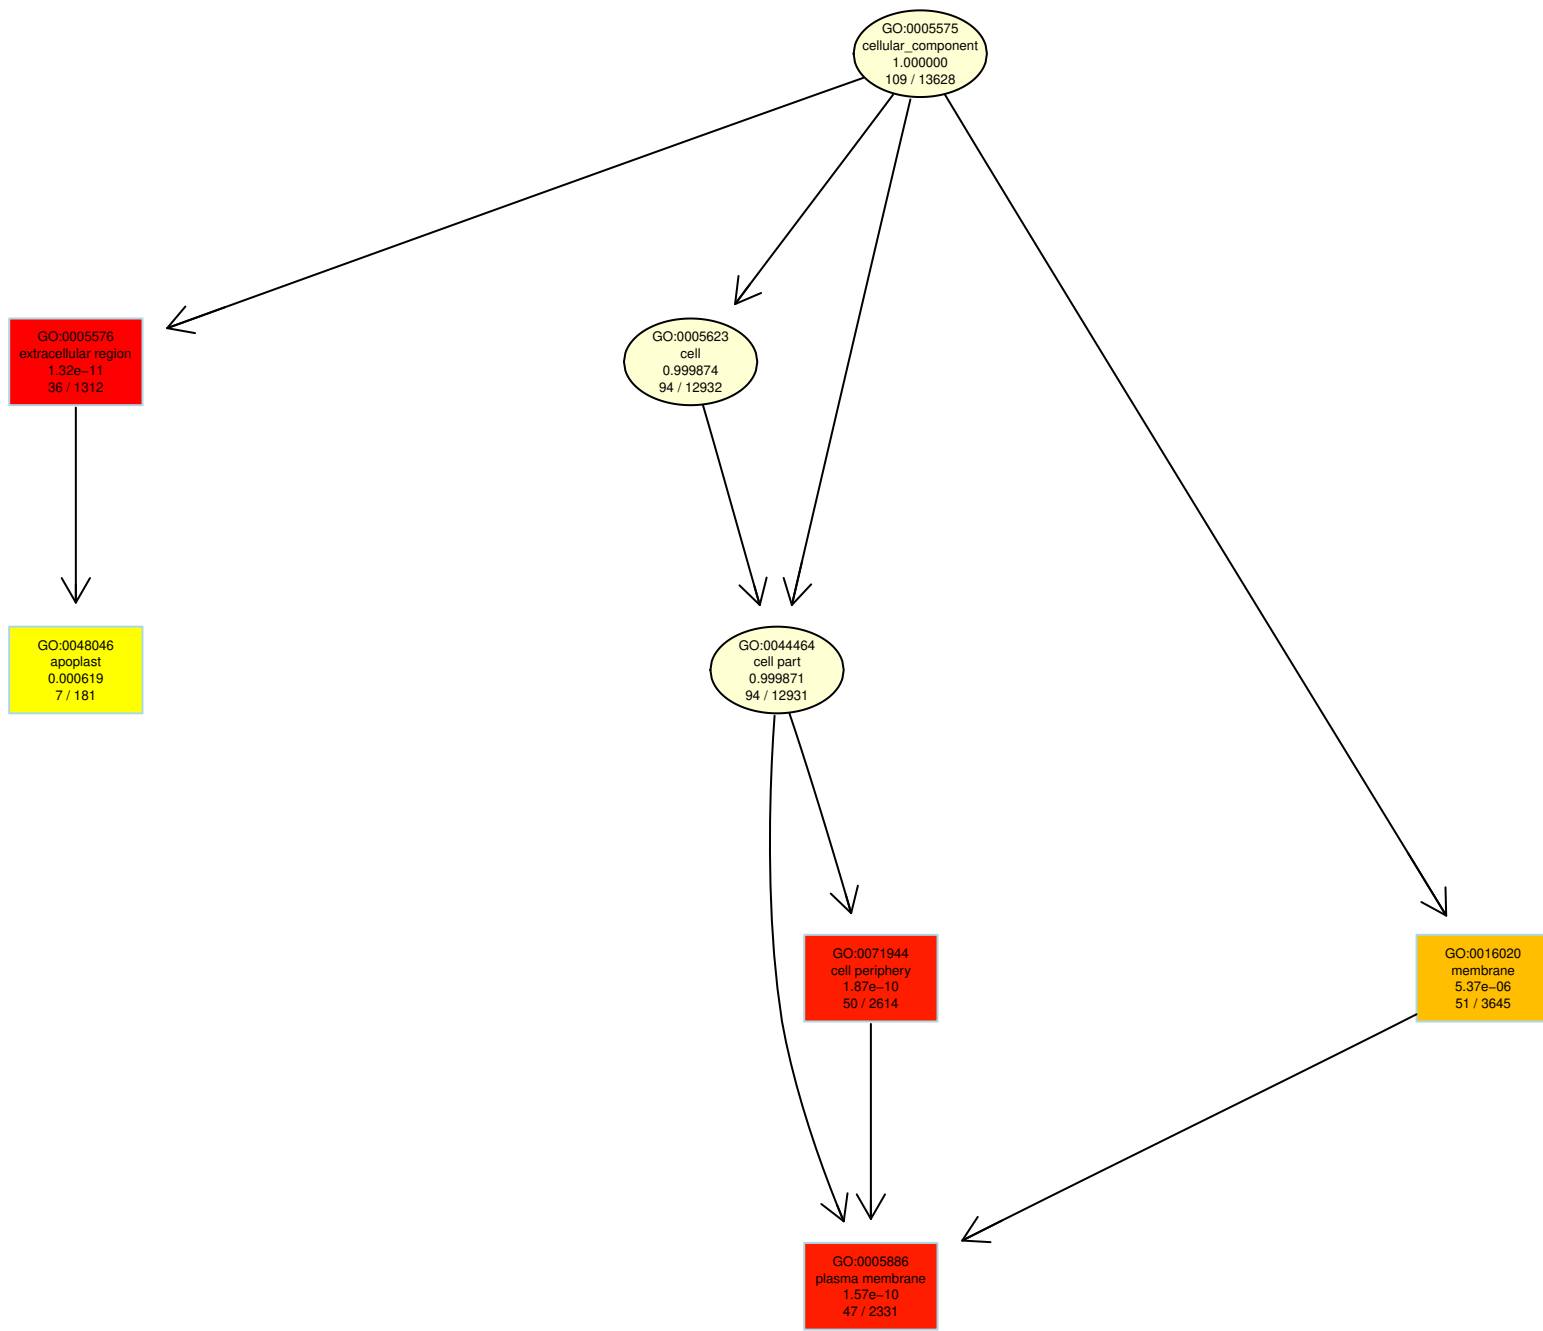

Supplement: PLD3-6-e396-s208.pdf [file PLD3-6-e396-s208.pdf]

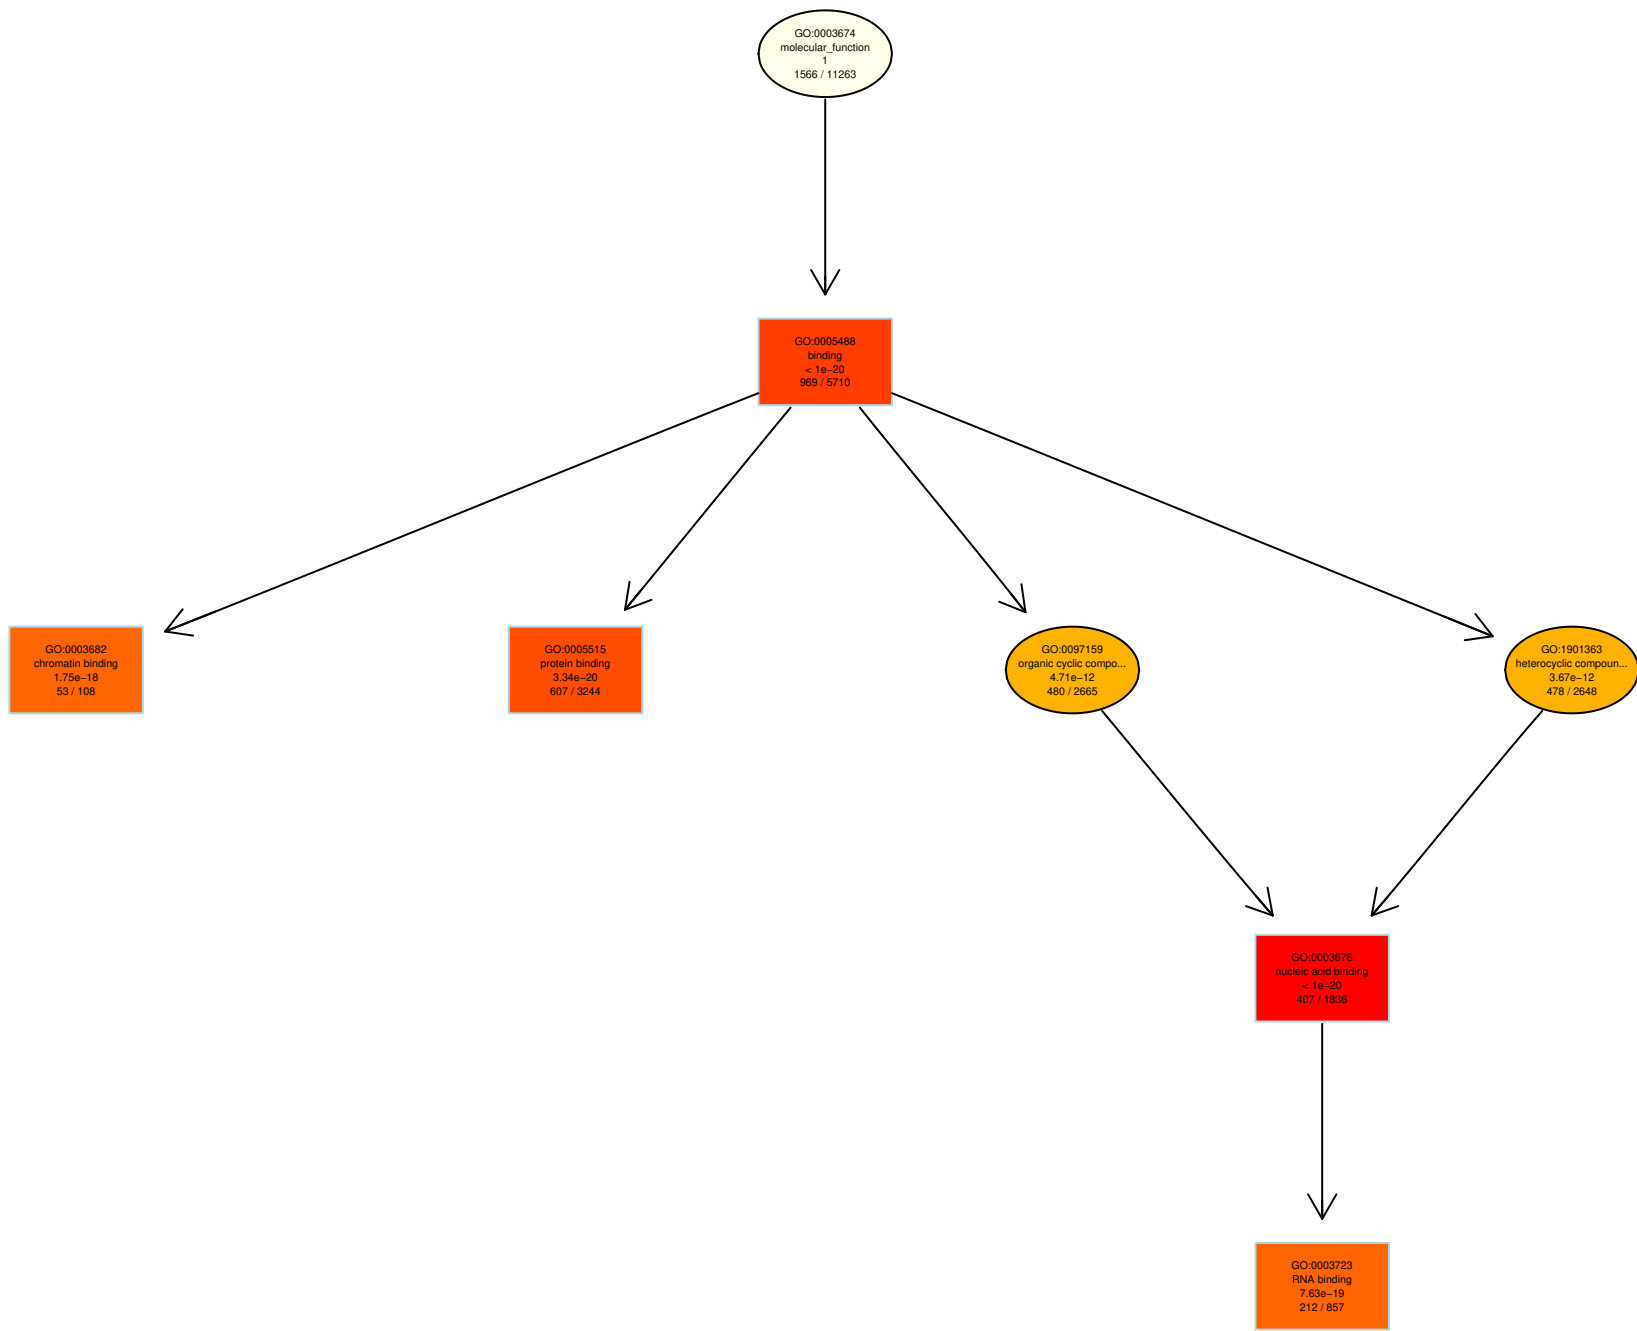

Supplement: PLD3-6-e396-s211.pdf [file PLD3-6-e396-s211.pdf]

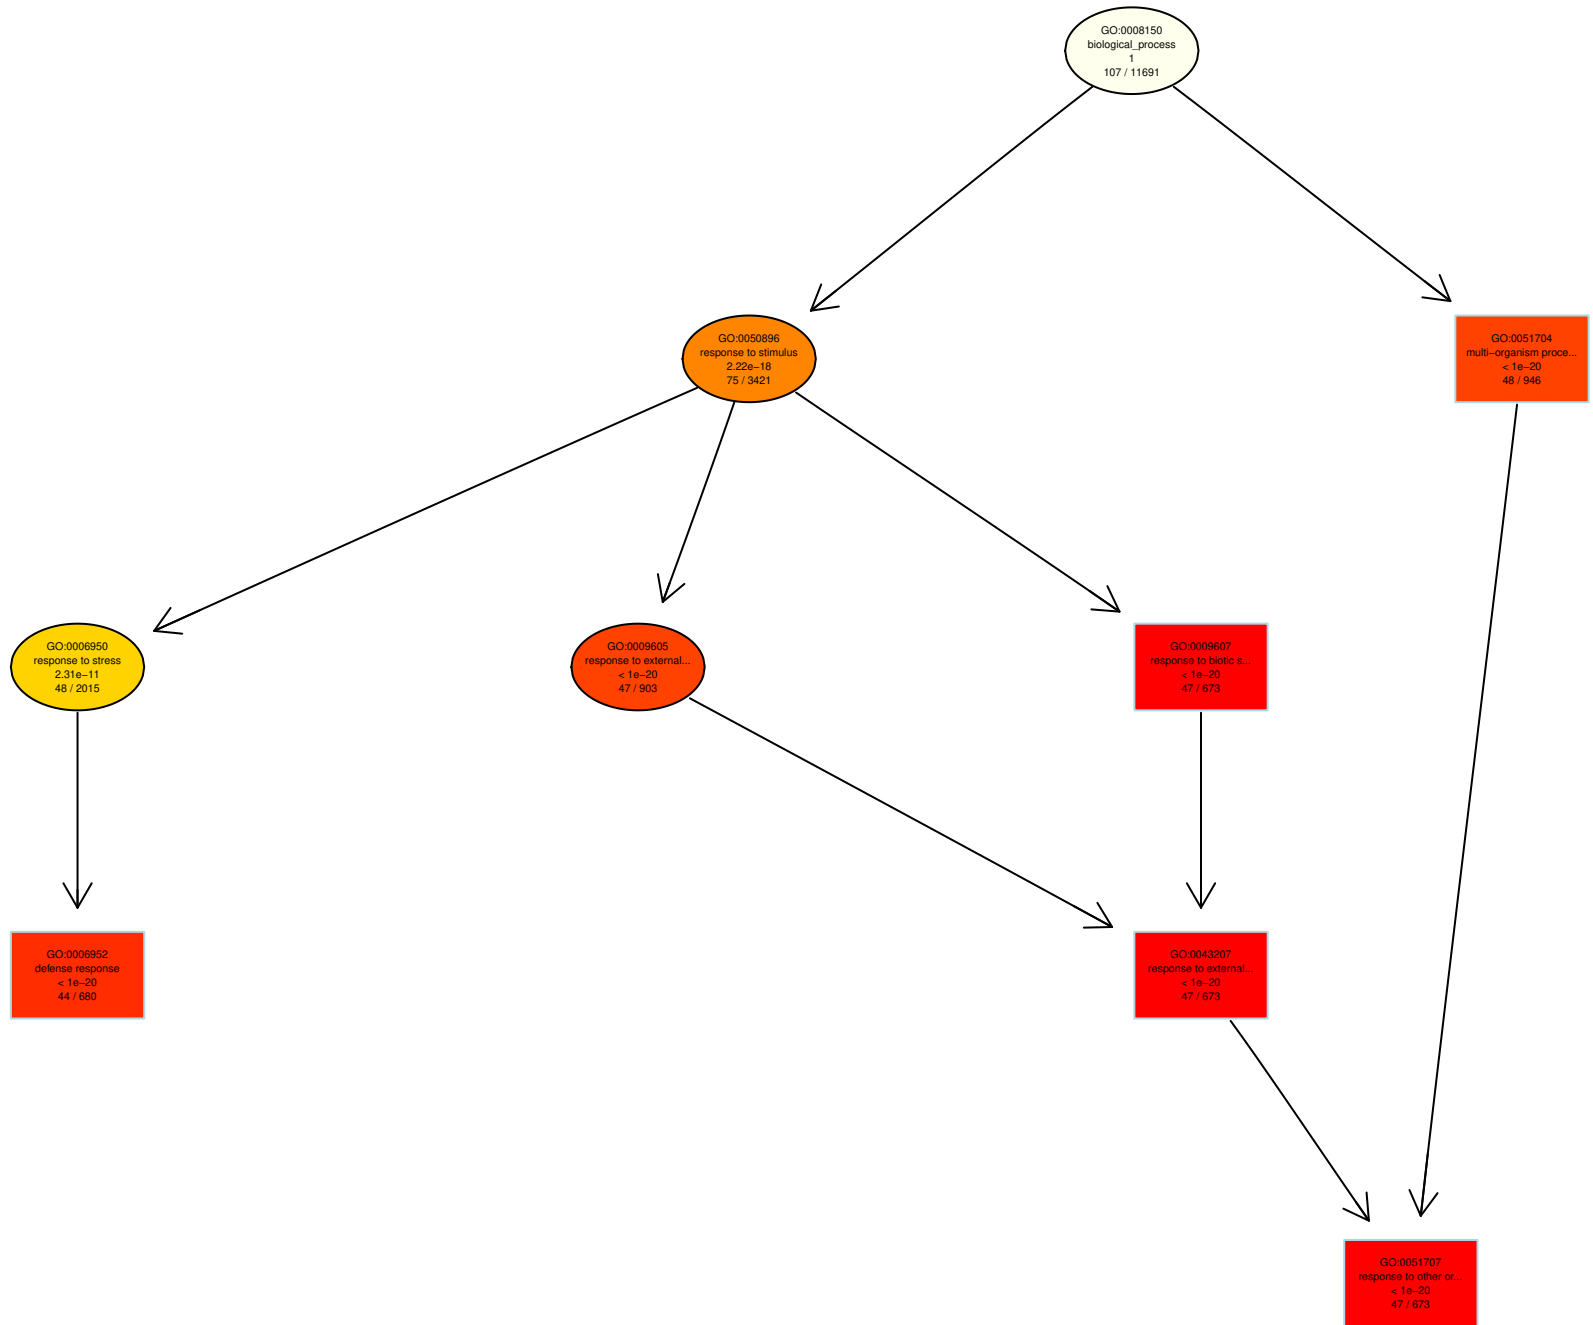

Supplement: PLD3-6-e396-s213.pdf [file PLD3-6-e396-s213.pdf]

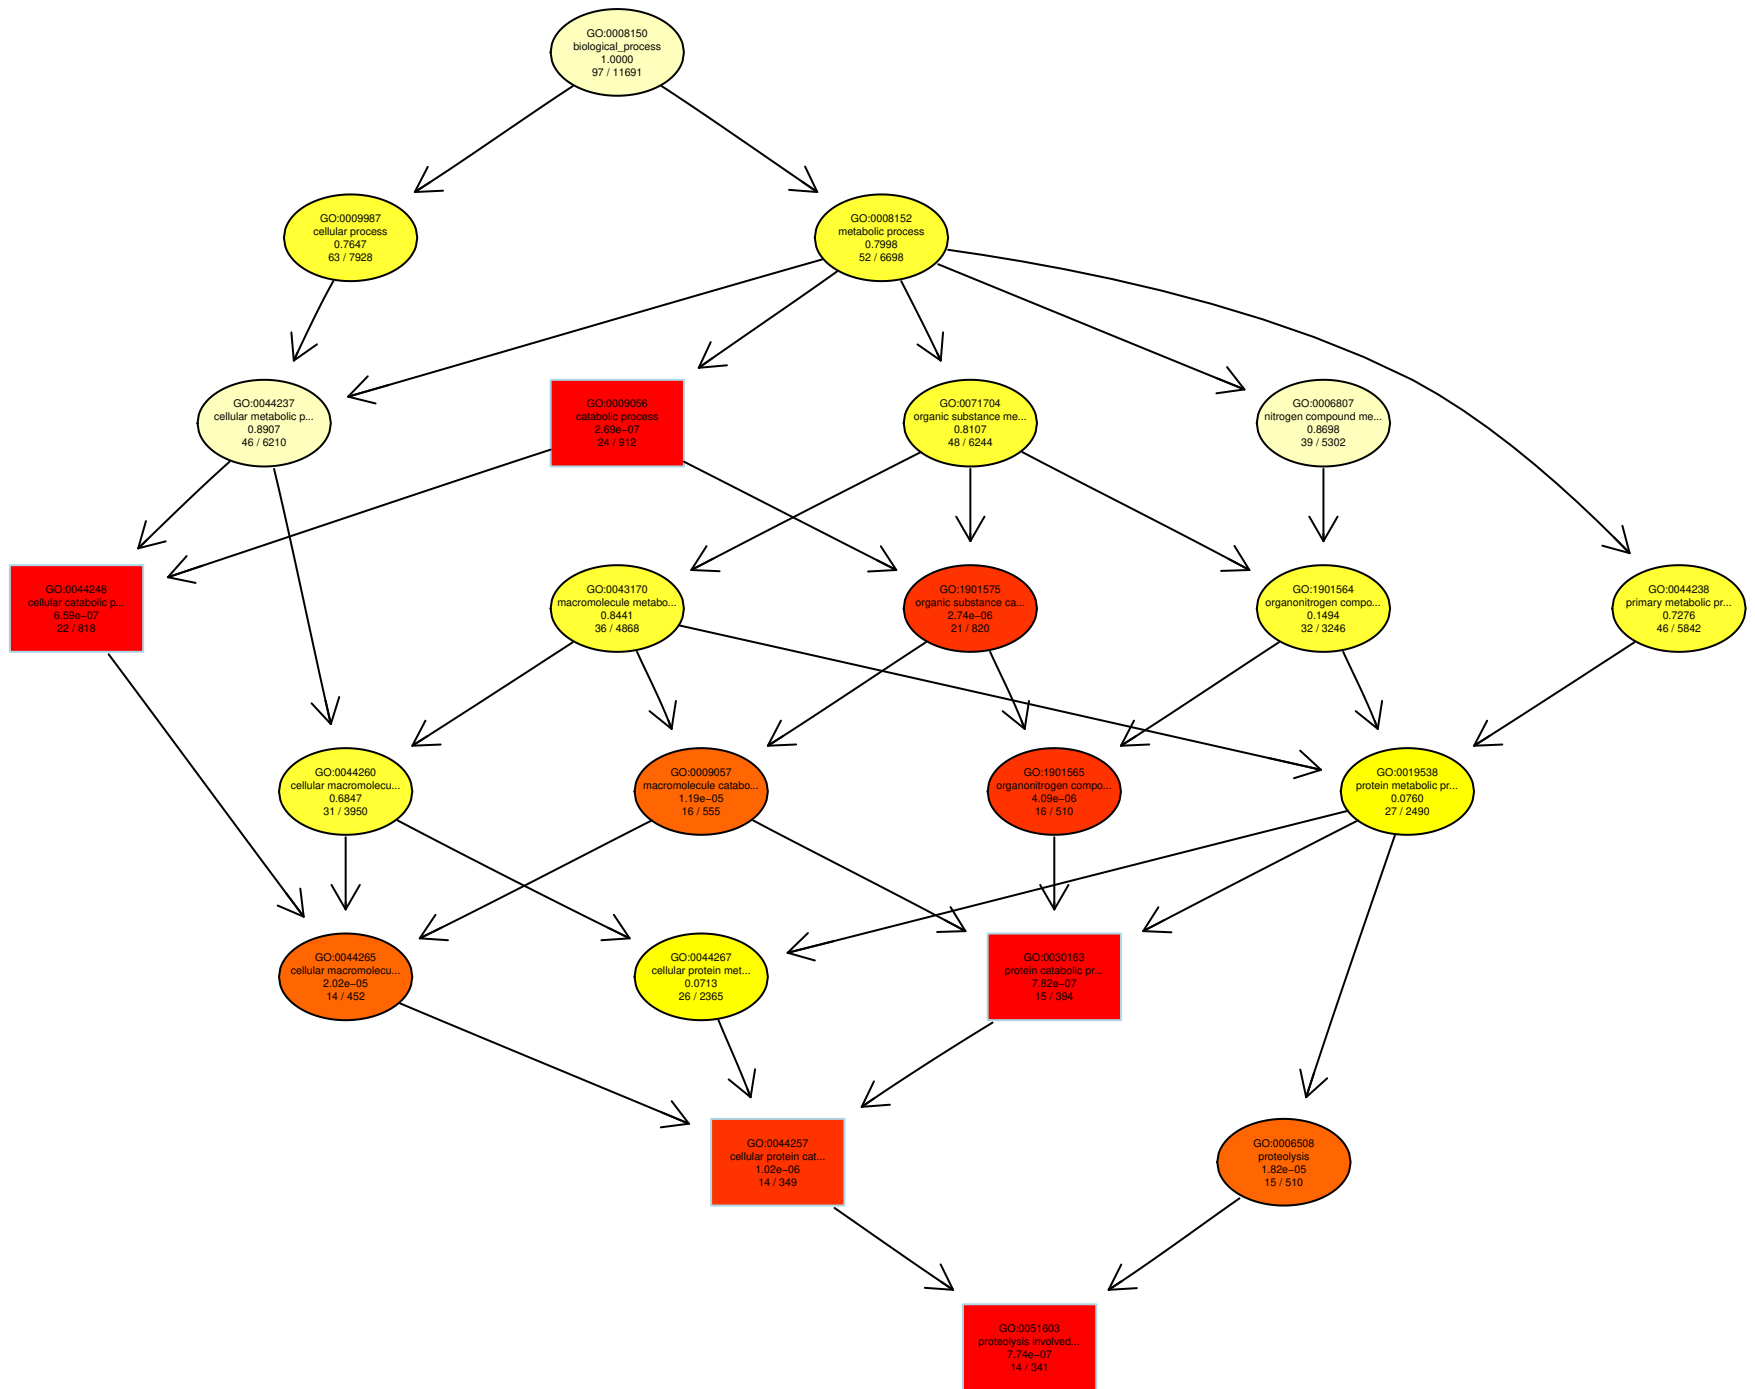

Supplement: PLD3-6-e396-s215.pdf [file PLD3-6-e396-s215.pdf]

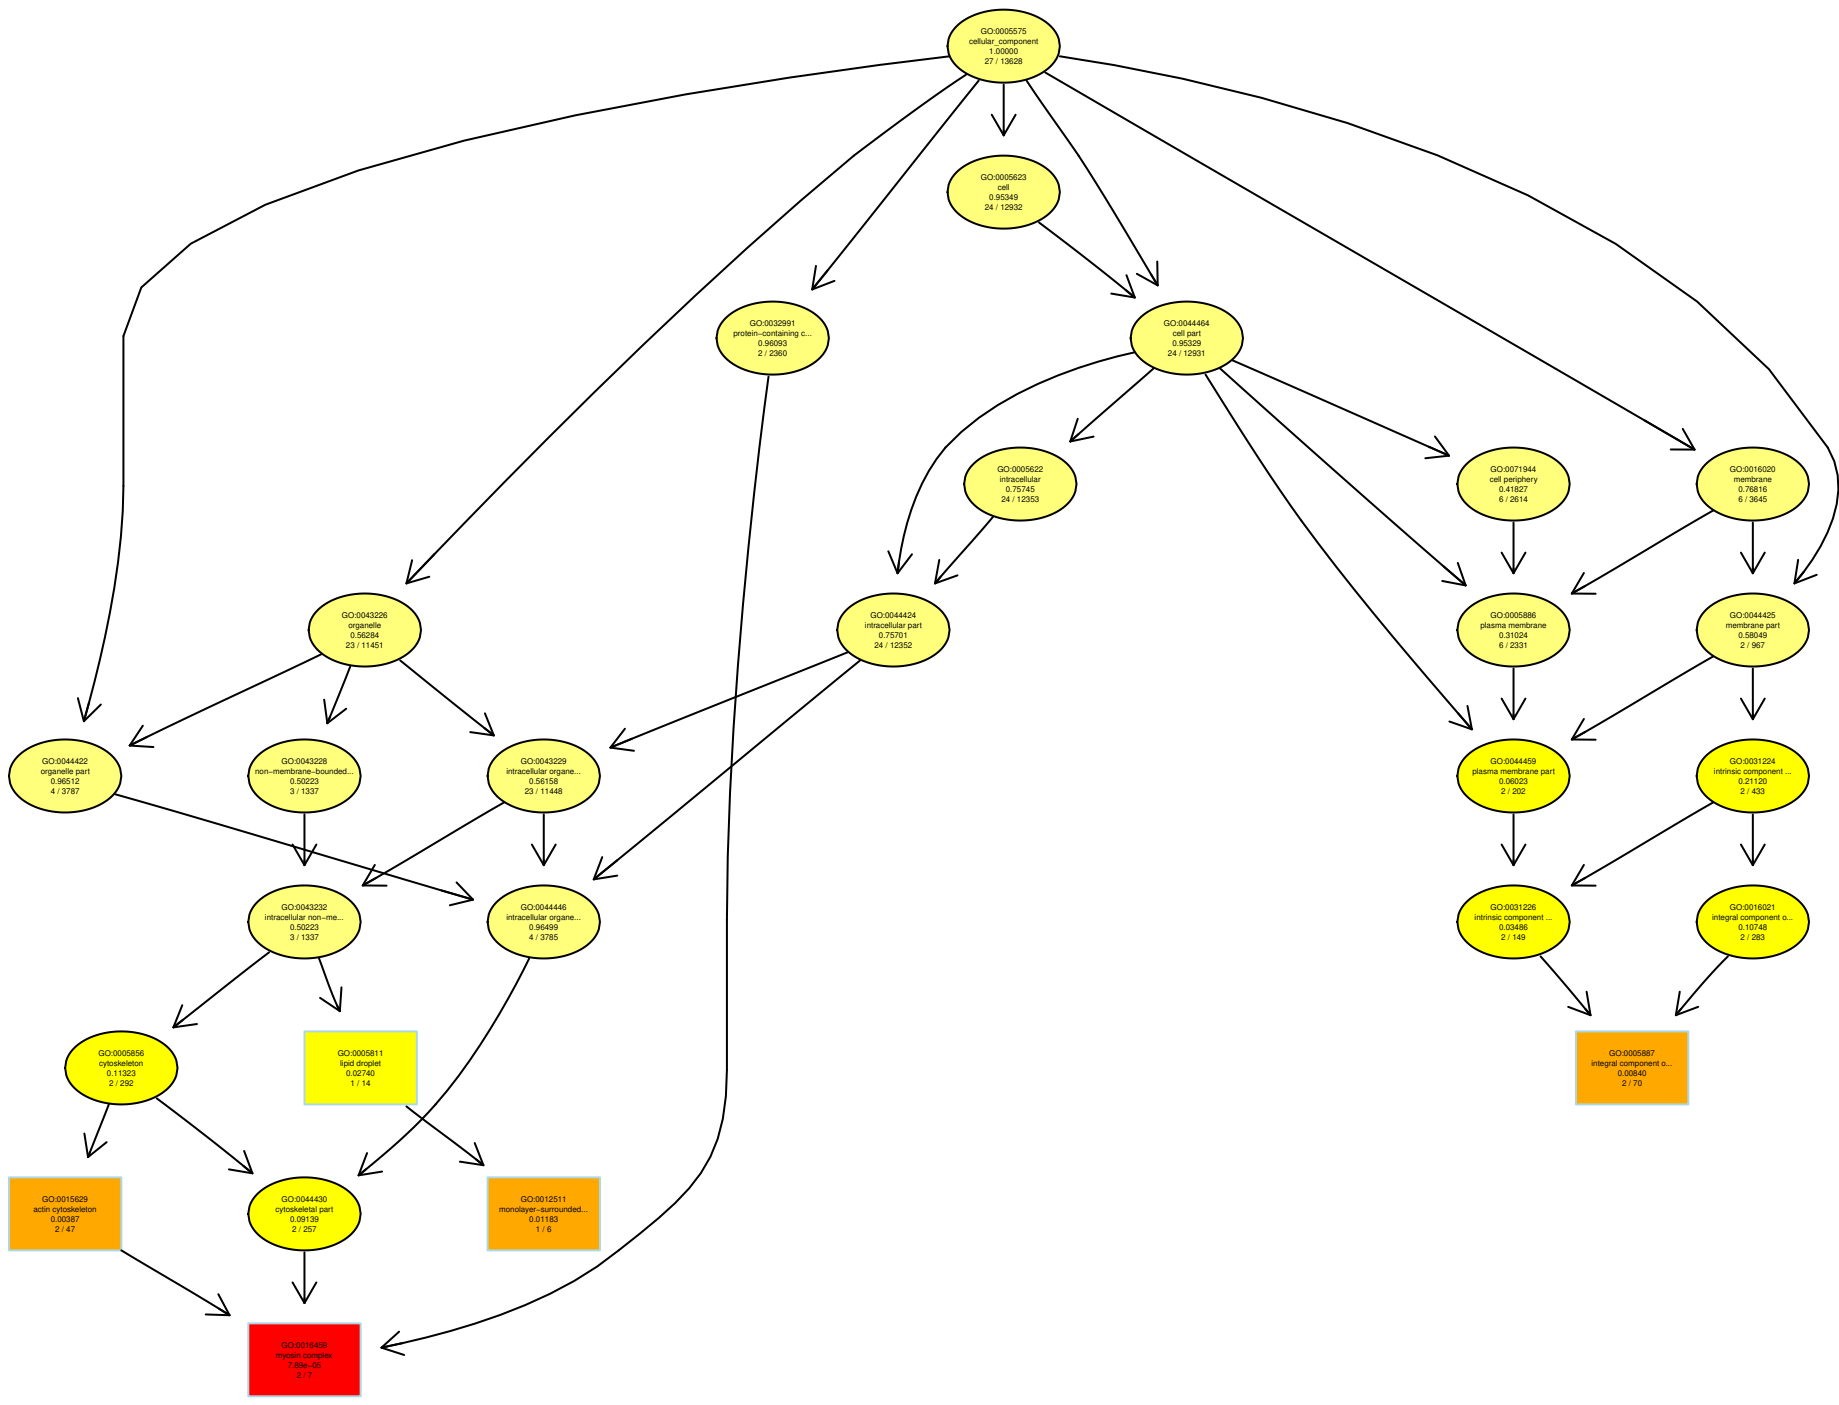

Supplement: PLD3-6-e396-s217.pdf [file PLD3-6-e396-s217.pdf]

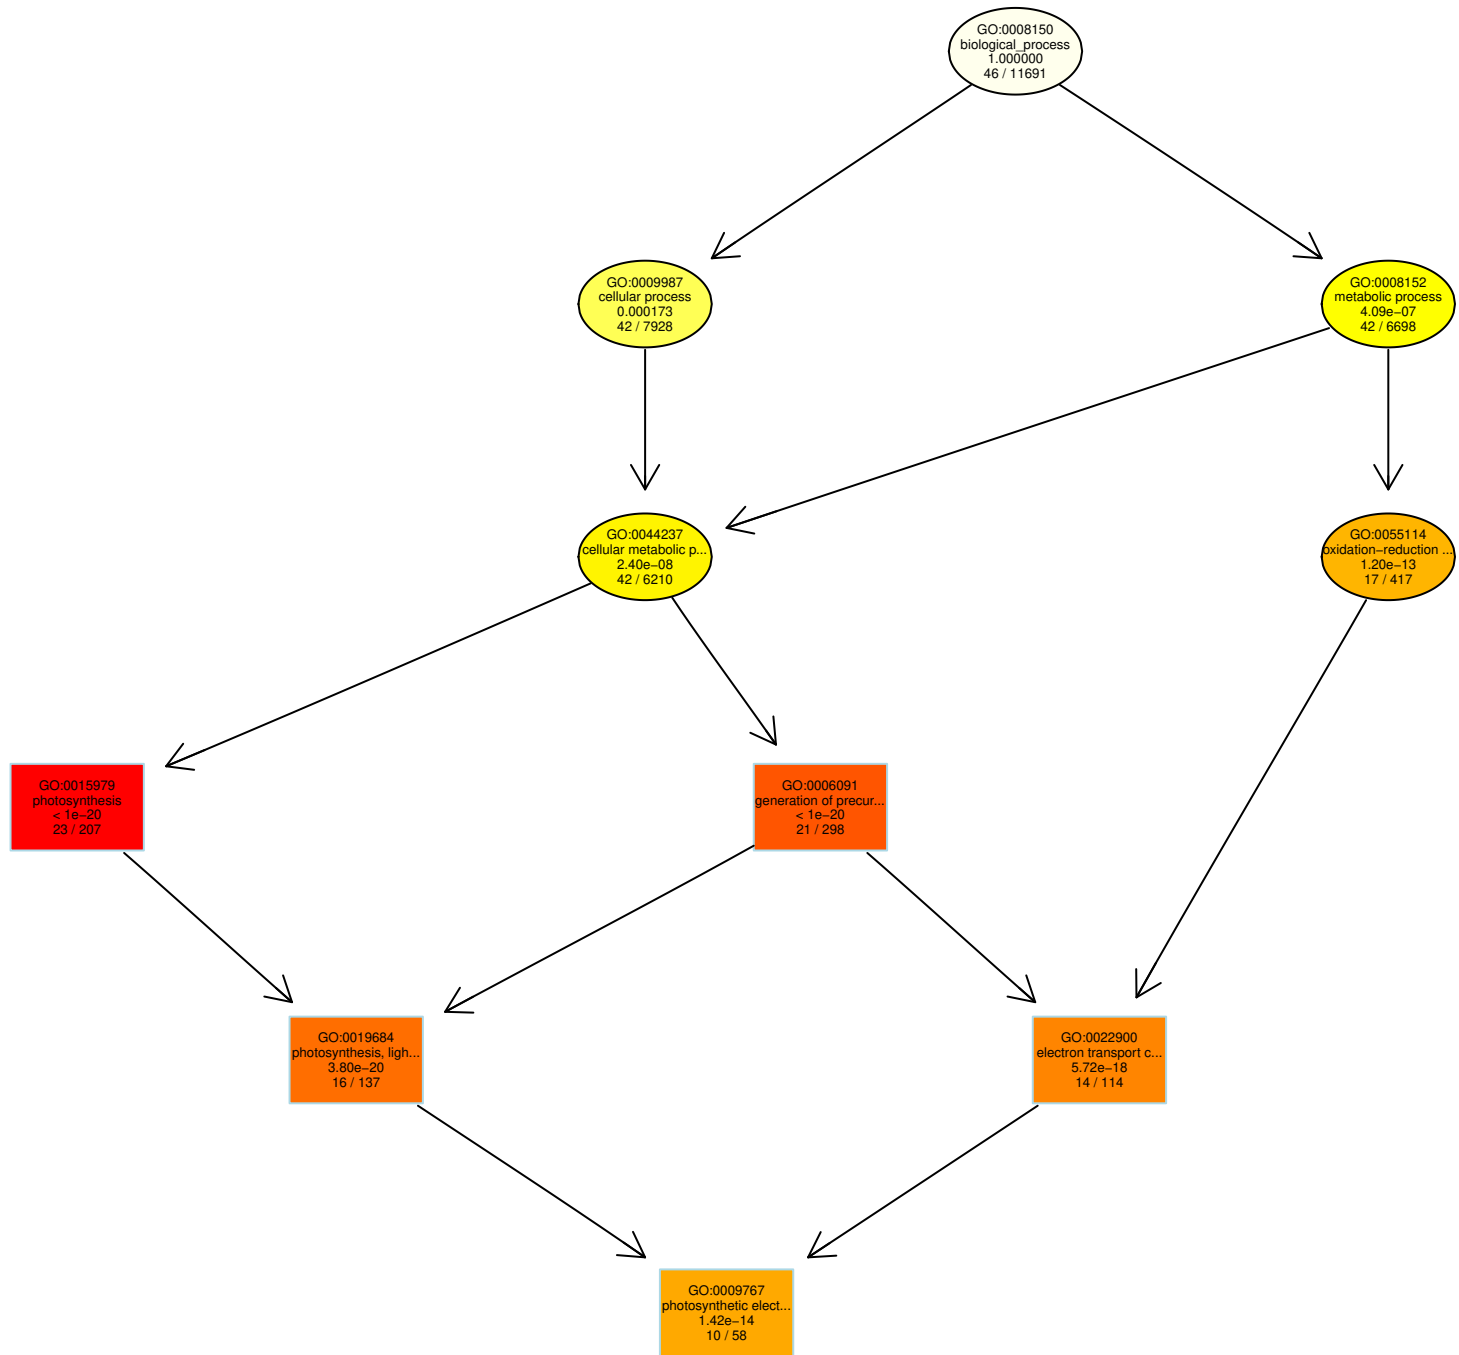

Supplement: PLD3-6-e396-s218.pdf [file PLD3-6-e396-s218.pdf]

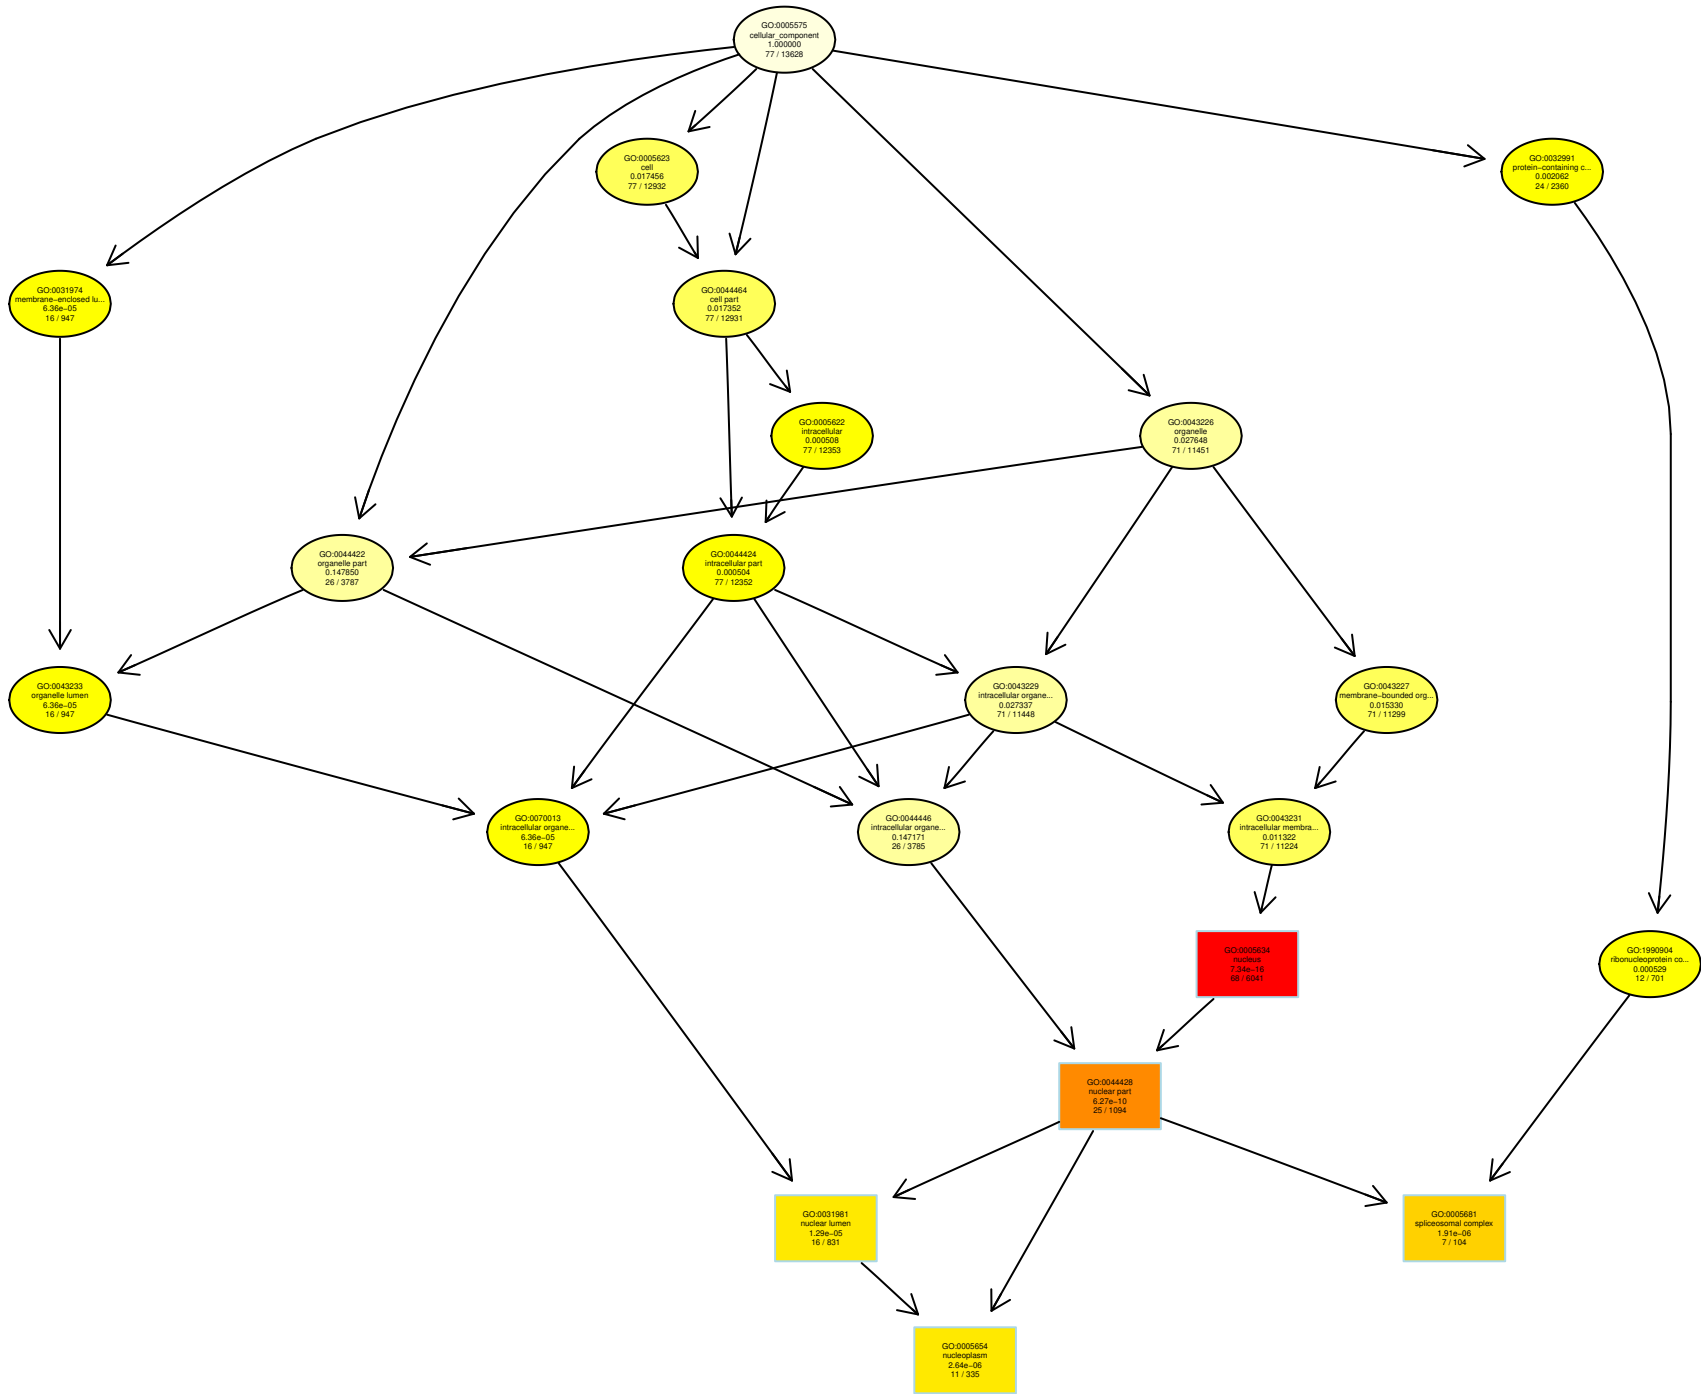

Supplement: PLD3-6-e396-s221.pdf [file PLD3-6-e396-s221.pdf]

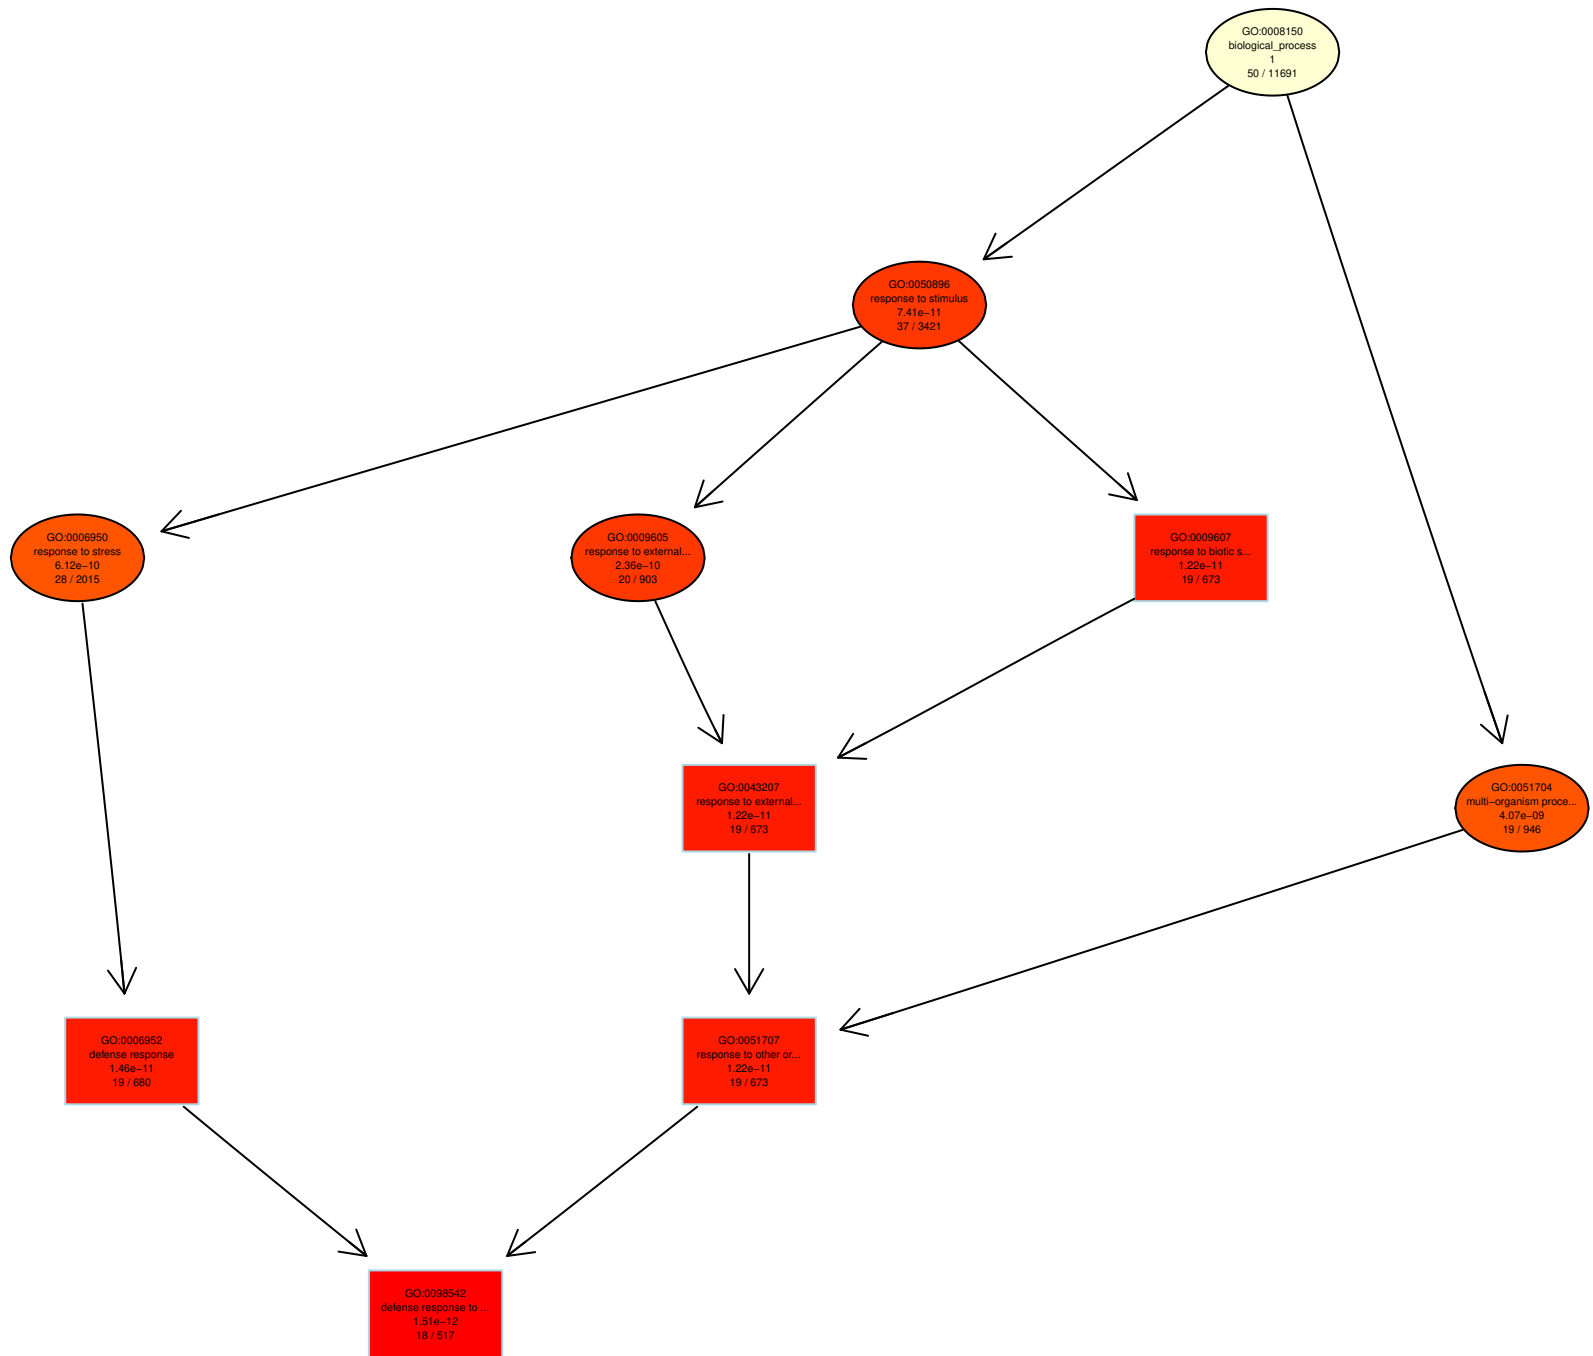

Supplement: PLD3-6-e396-s230.pdf [file PLD3-6-e396-s230.pdf]

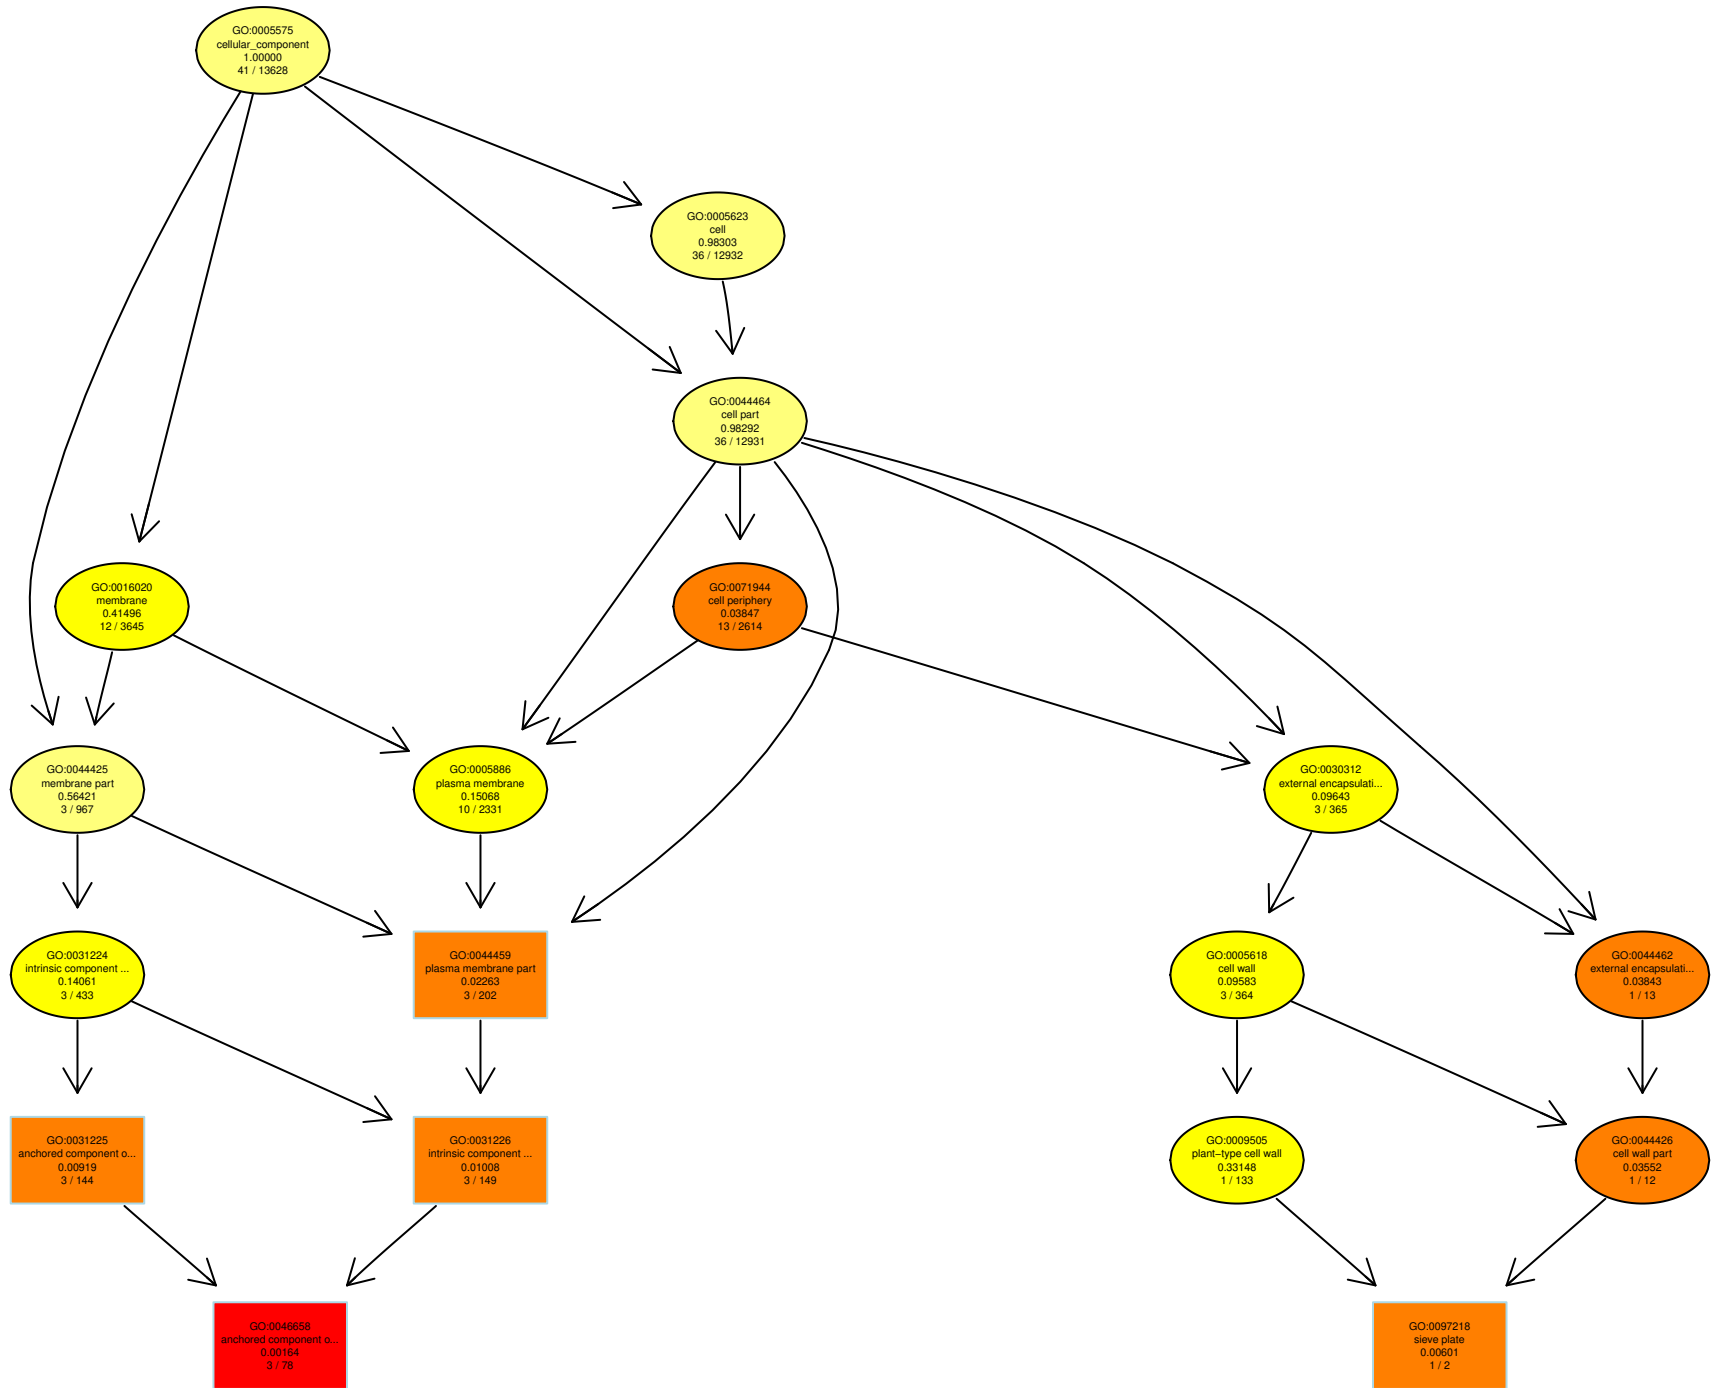

Supplement: PLD3-6-e396-s231.pdf [file PLD3-6-e396-s231.pdf]

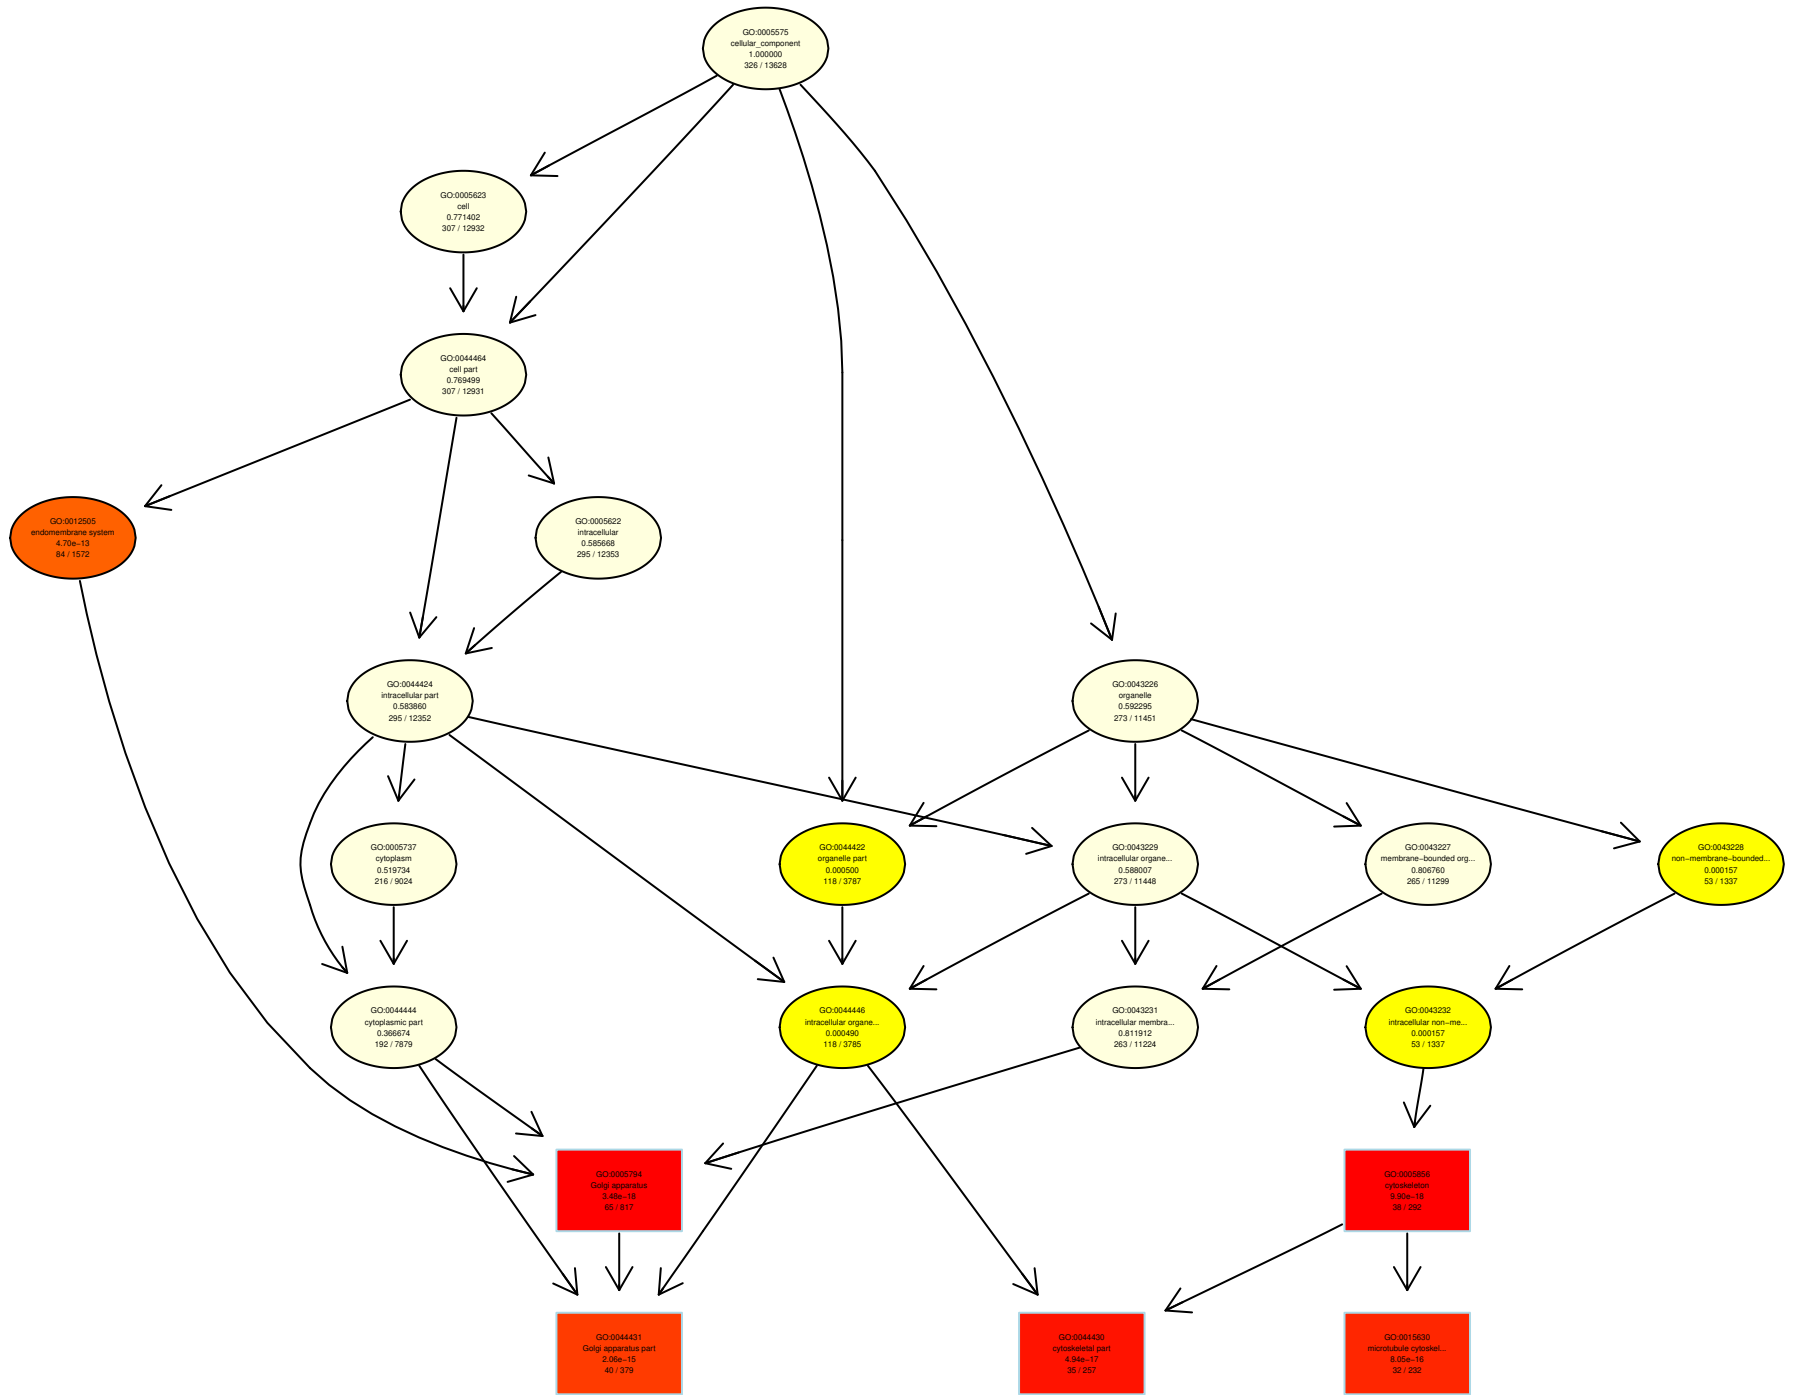

Supplement: PLD3-6-e396-s232.pdf [file PLD3-6-e396-s232.pdf]

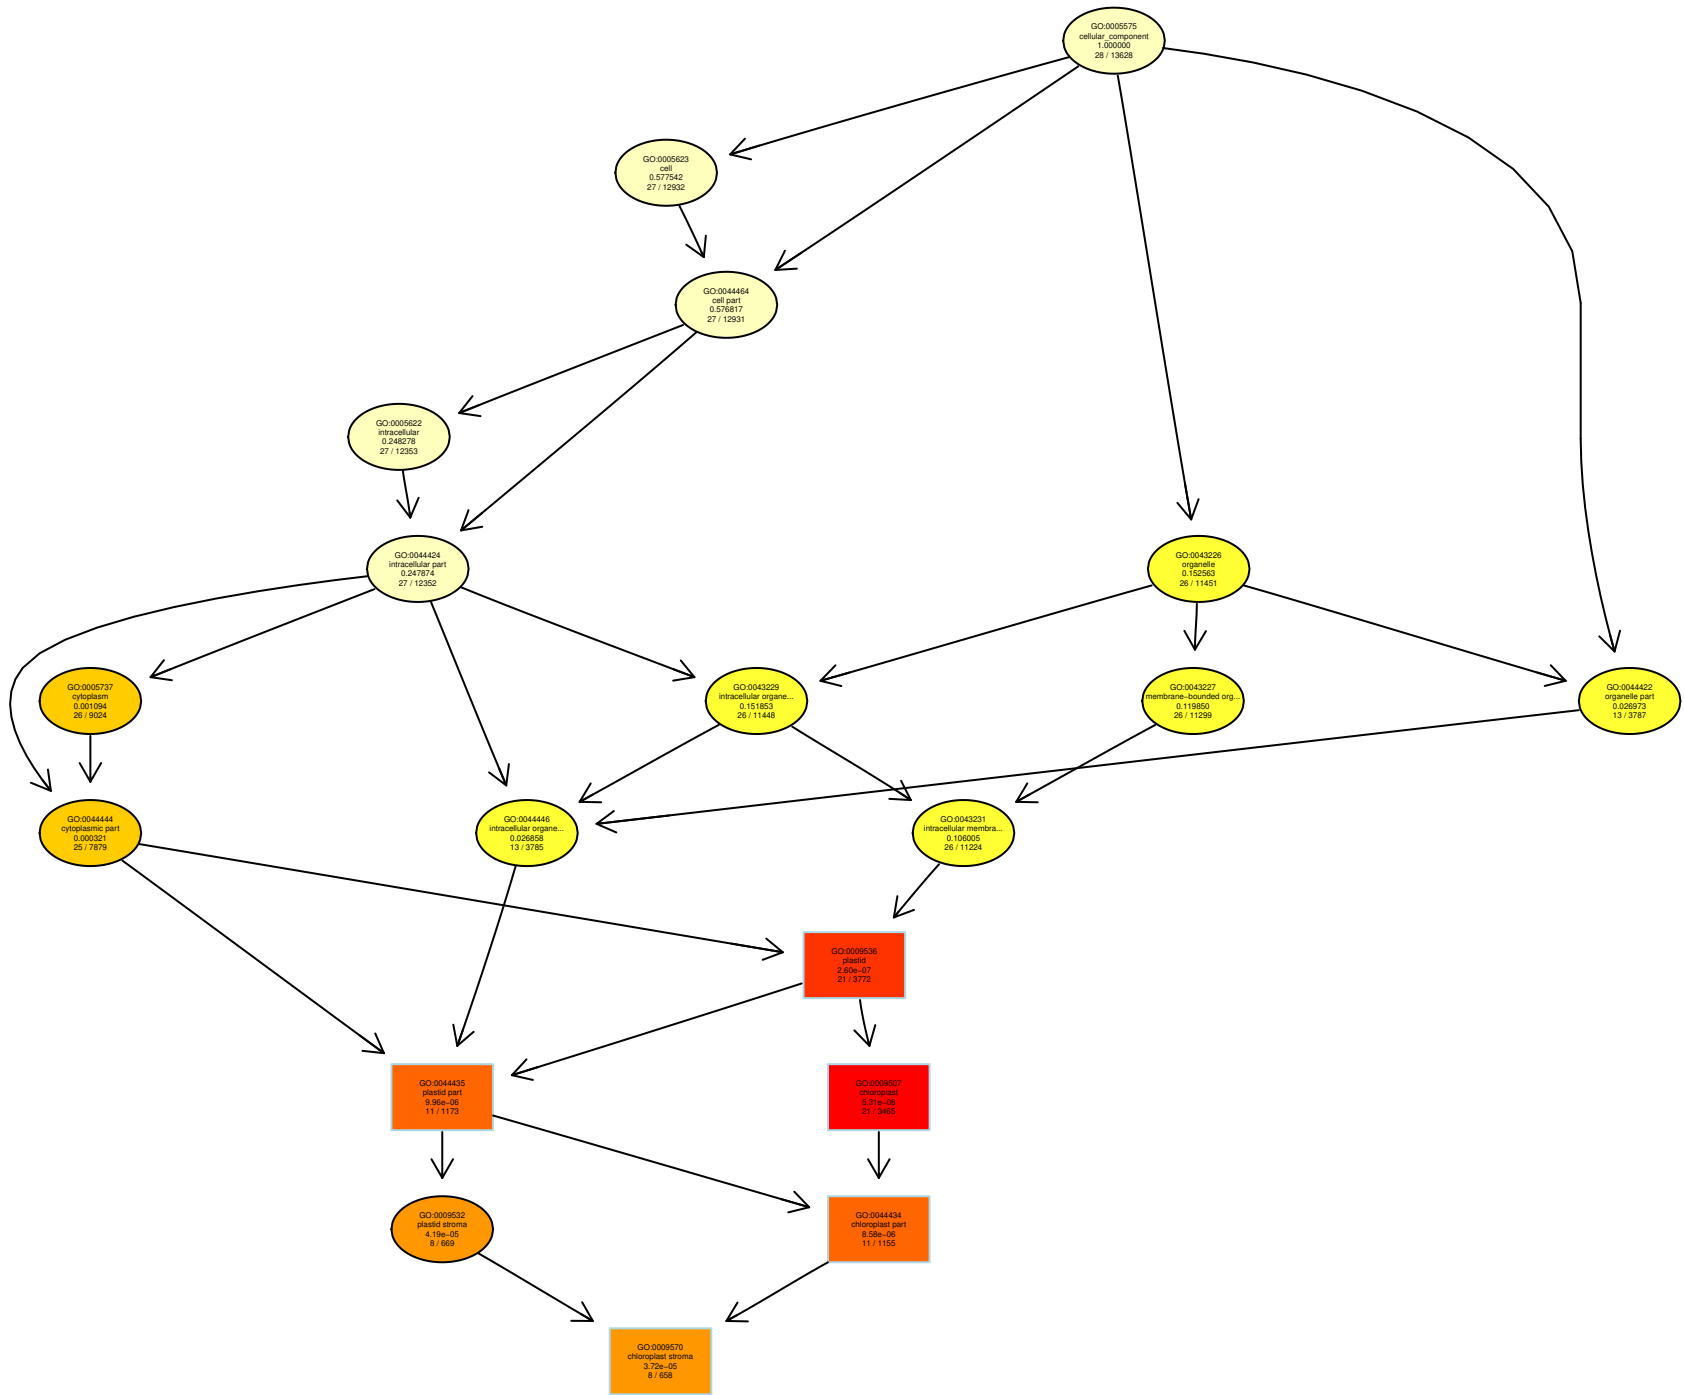

Supplement: PLD3-6-e396-s235.pdf [file PLD3-6-e396-s235.pdf]

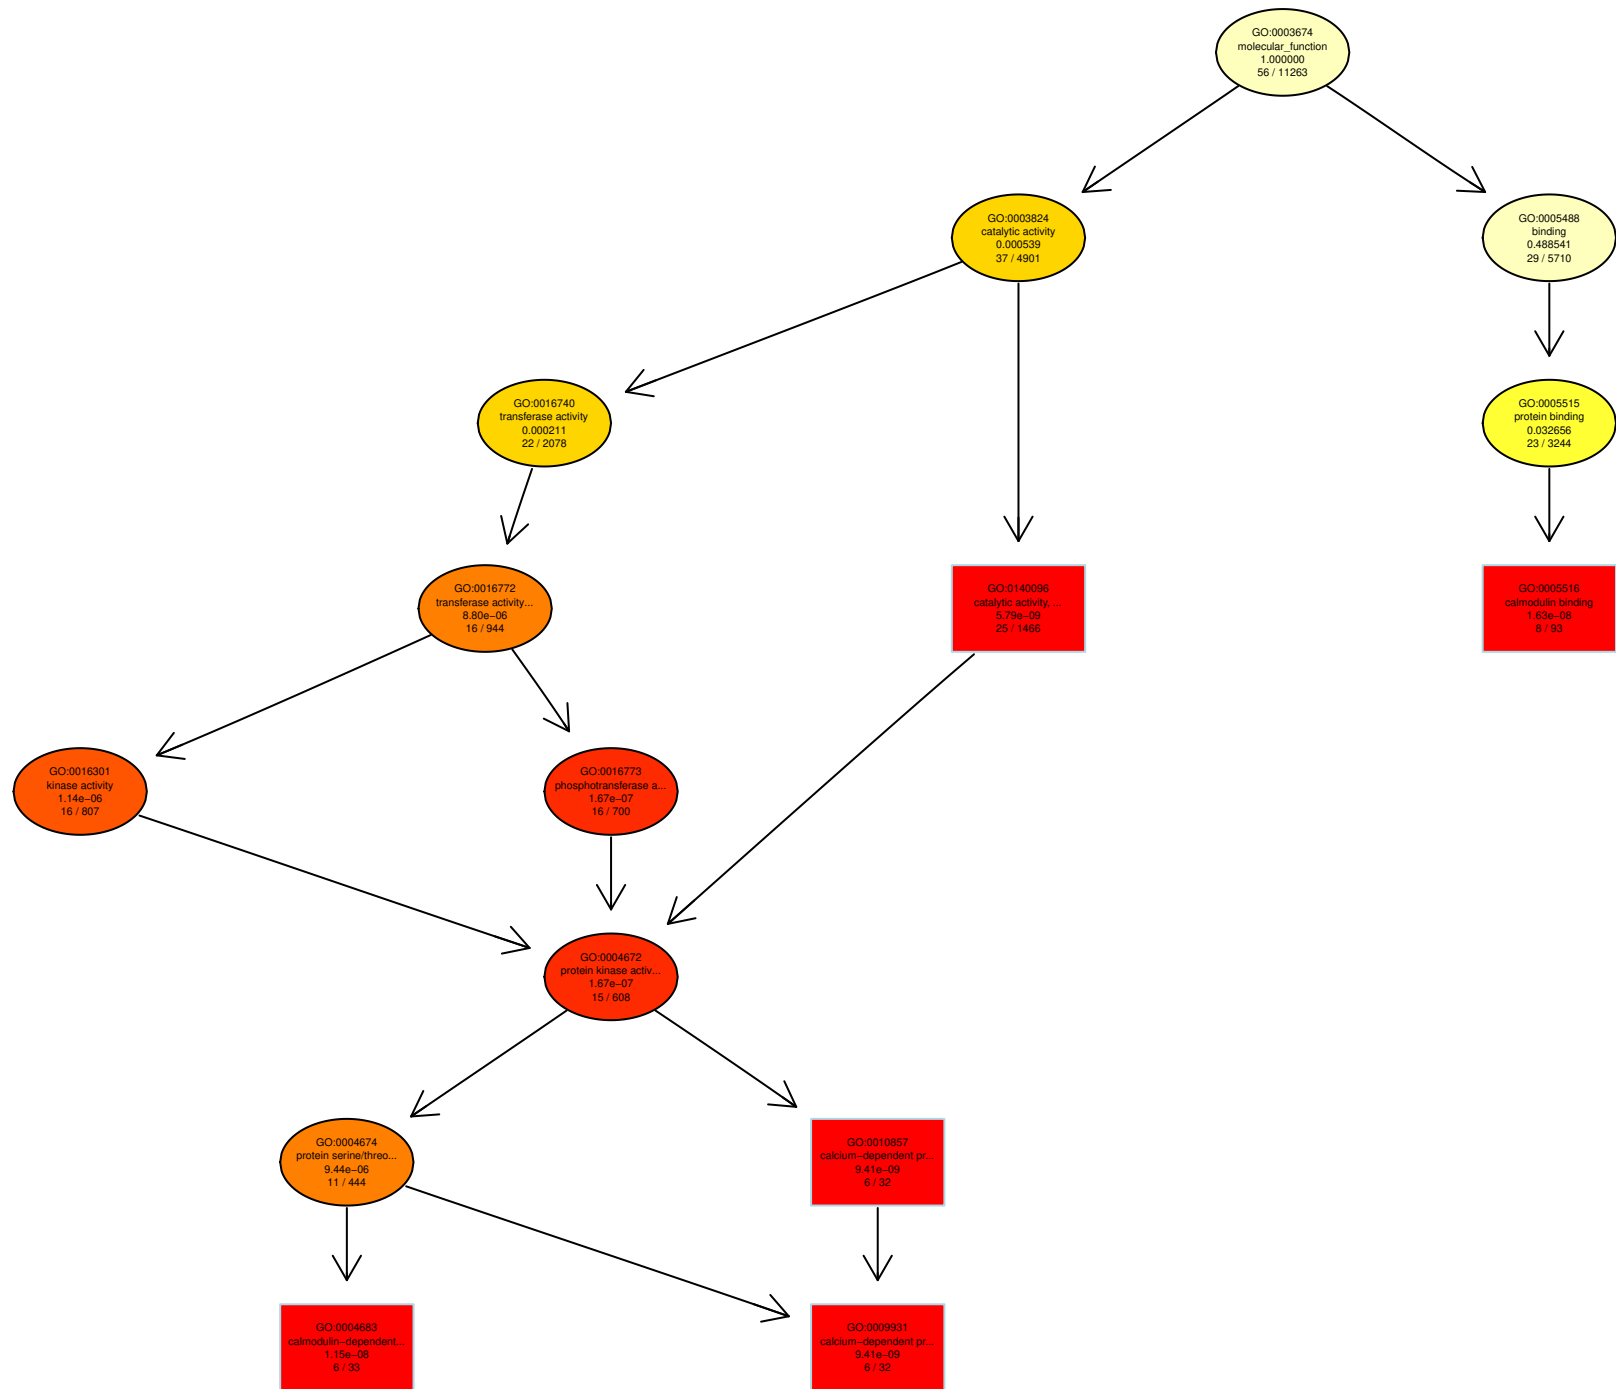

Supplement: PLD3-6-e396-s237.pdf [file PLD3-6-e396-s237.pdf]

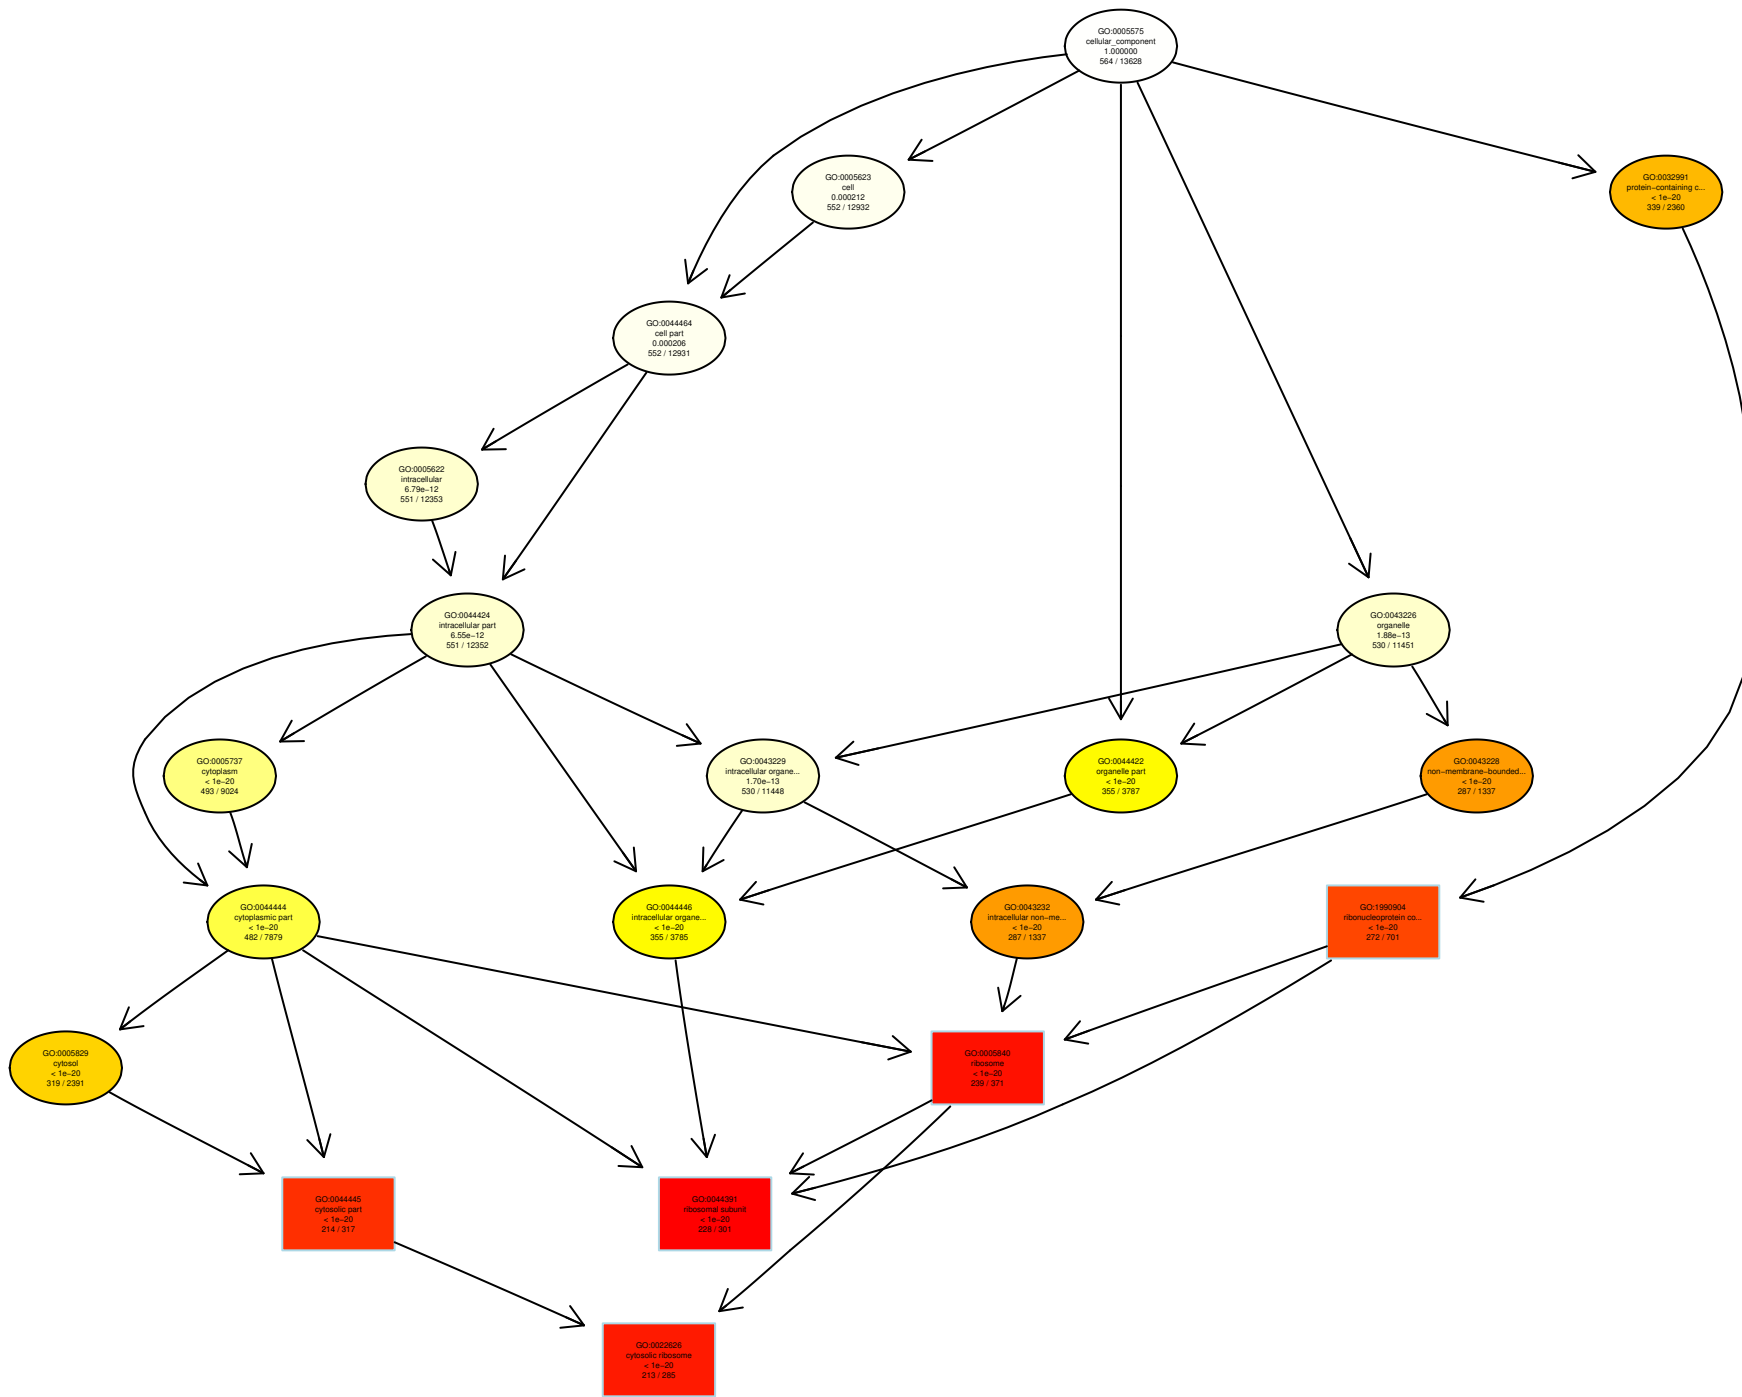

Supplement: PLD3-6-e396-s238.pdf [file PLD3-6-e396-s238.pdf]

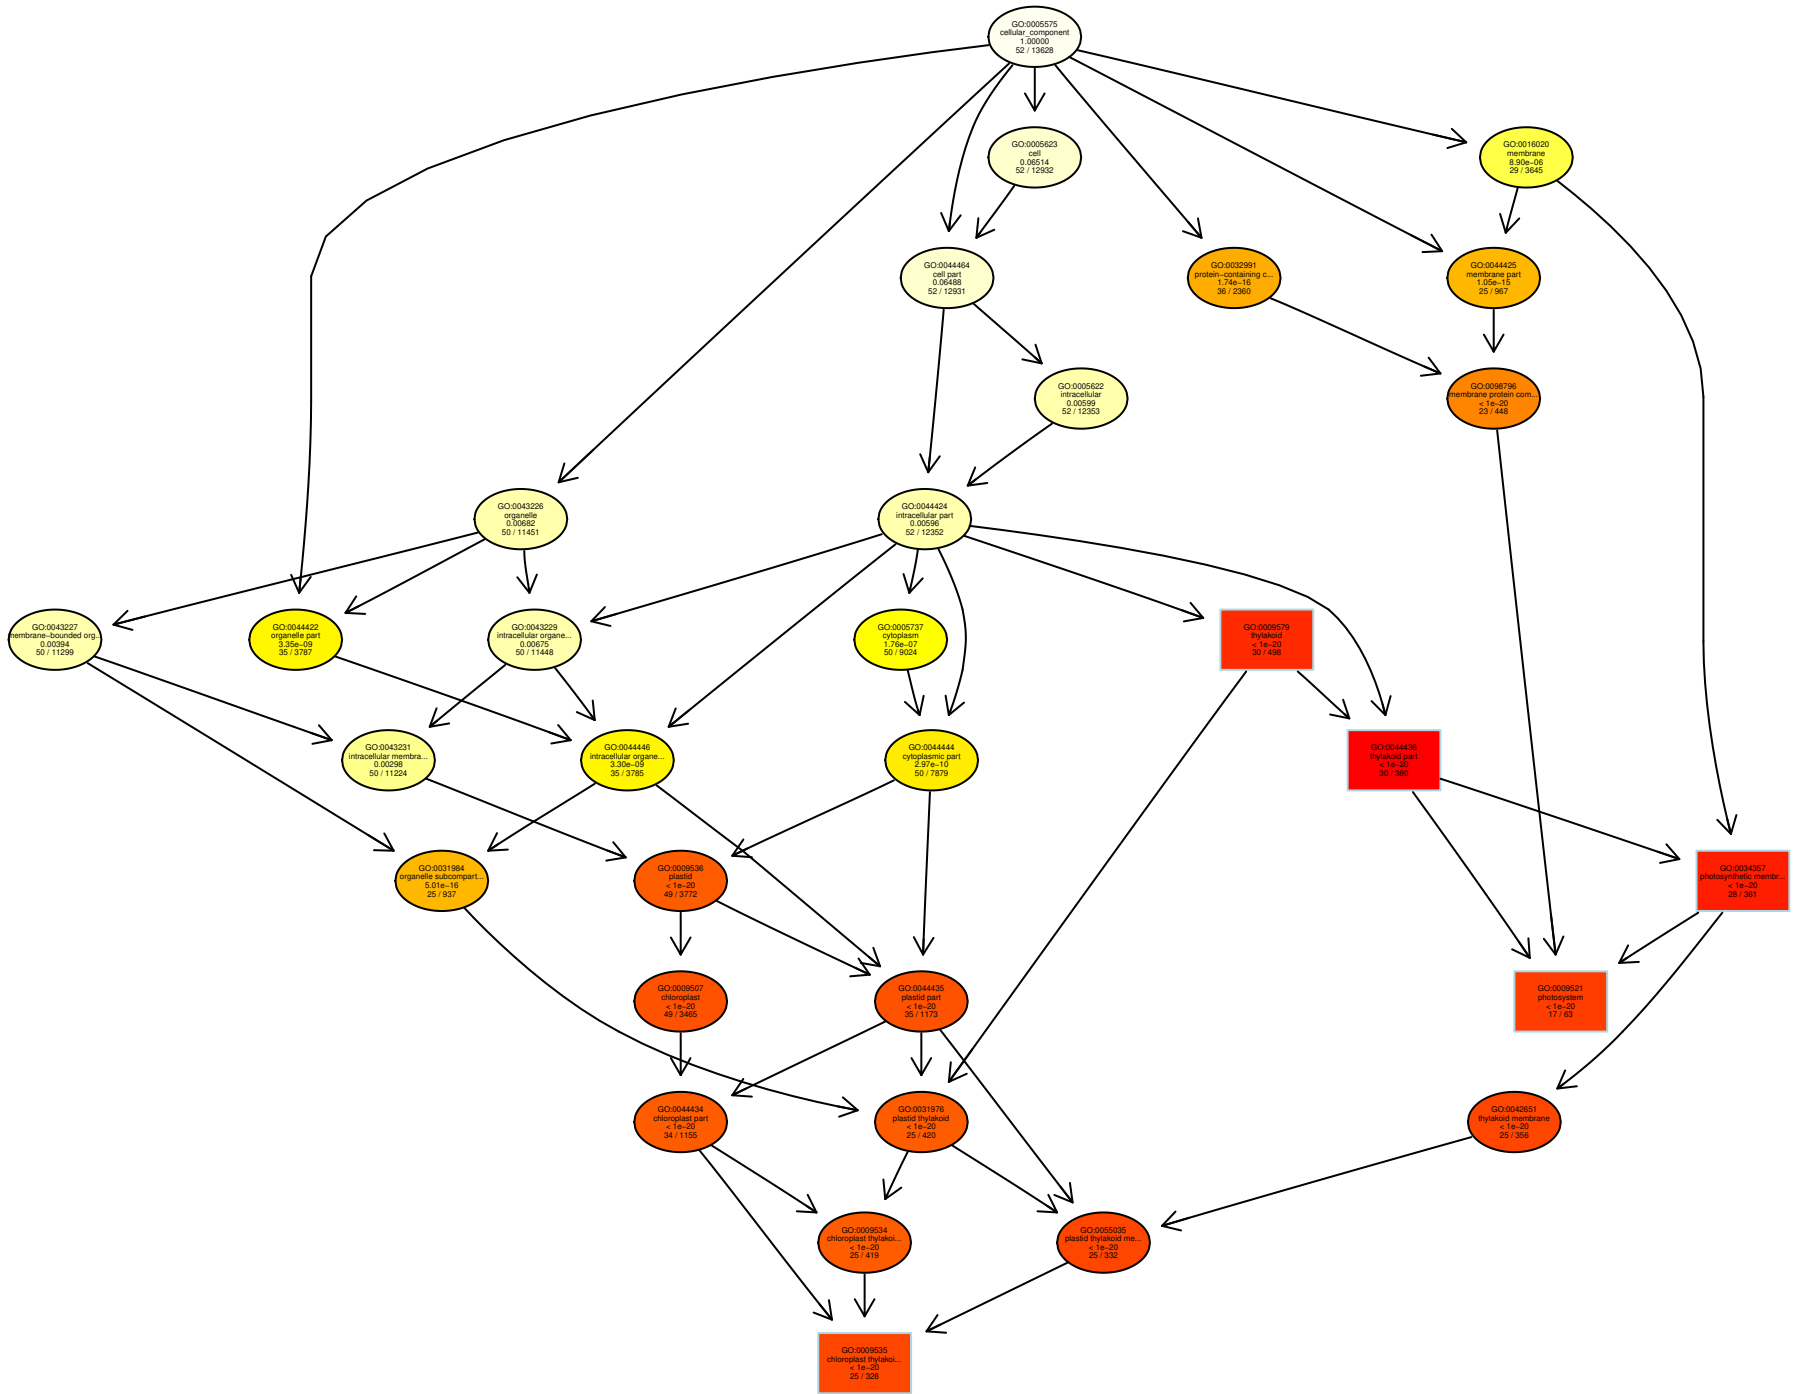

Supplement: PLD3-6-e396-s240.pdf [file PLD3-6-e396-s240.pdf]

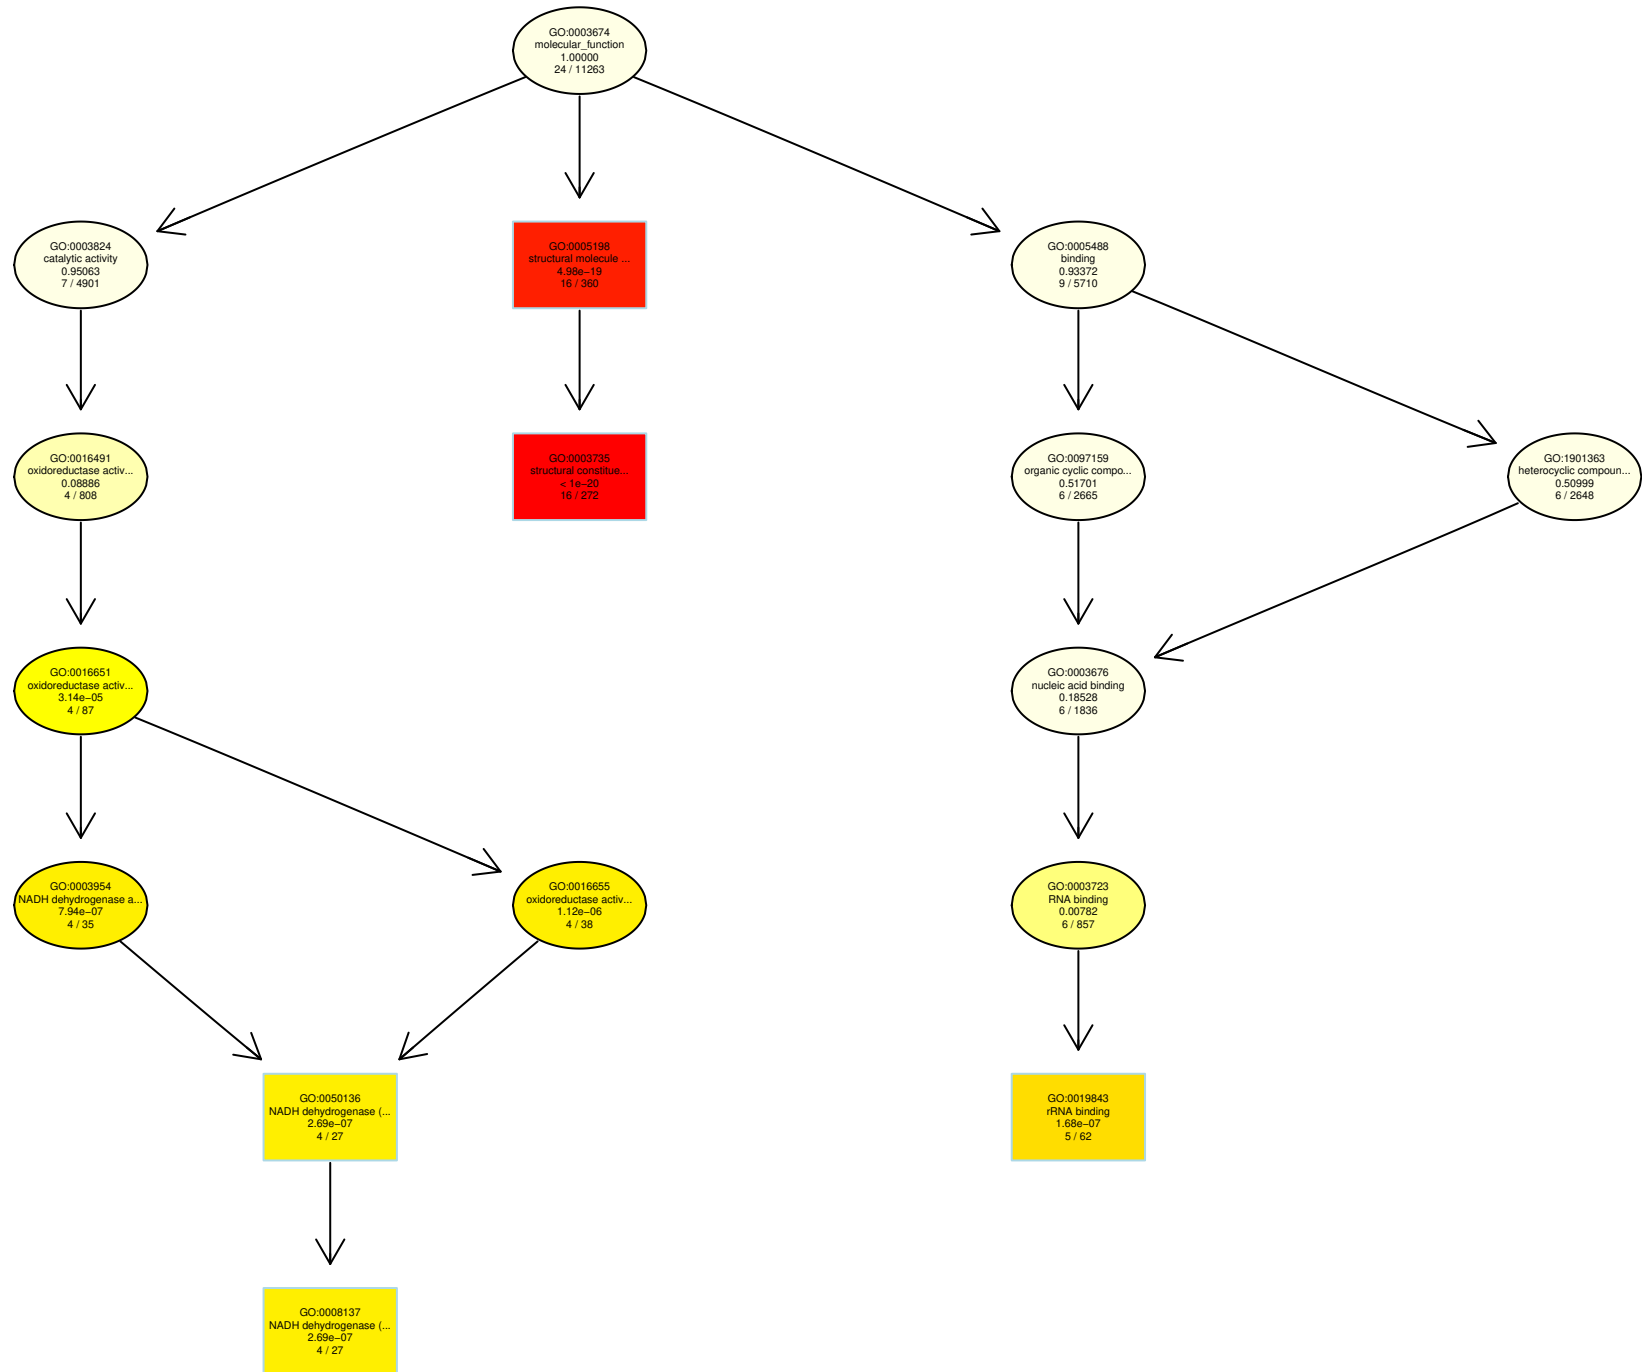

Supplement: PLD3-6-e396-s241.pdf [file PLD3-6-e396-s241.pdf]

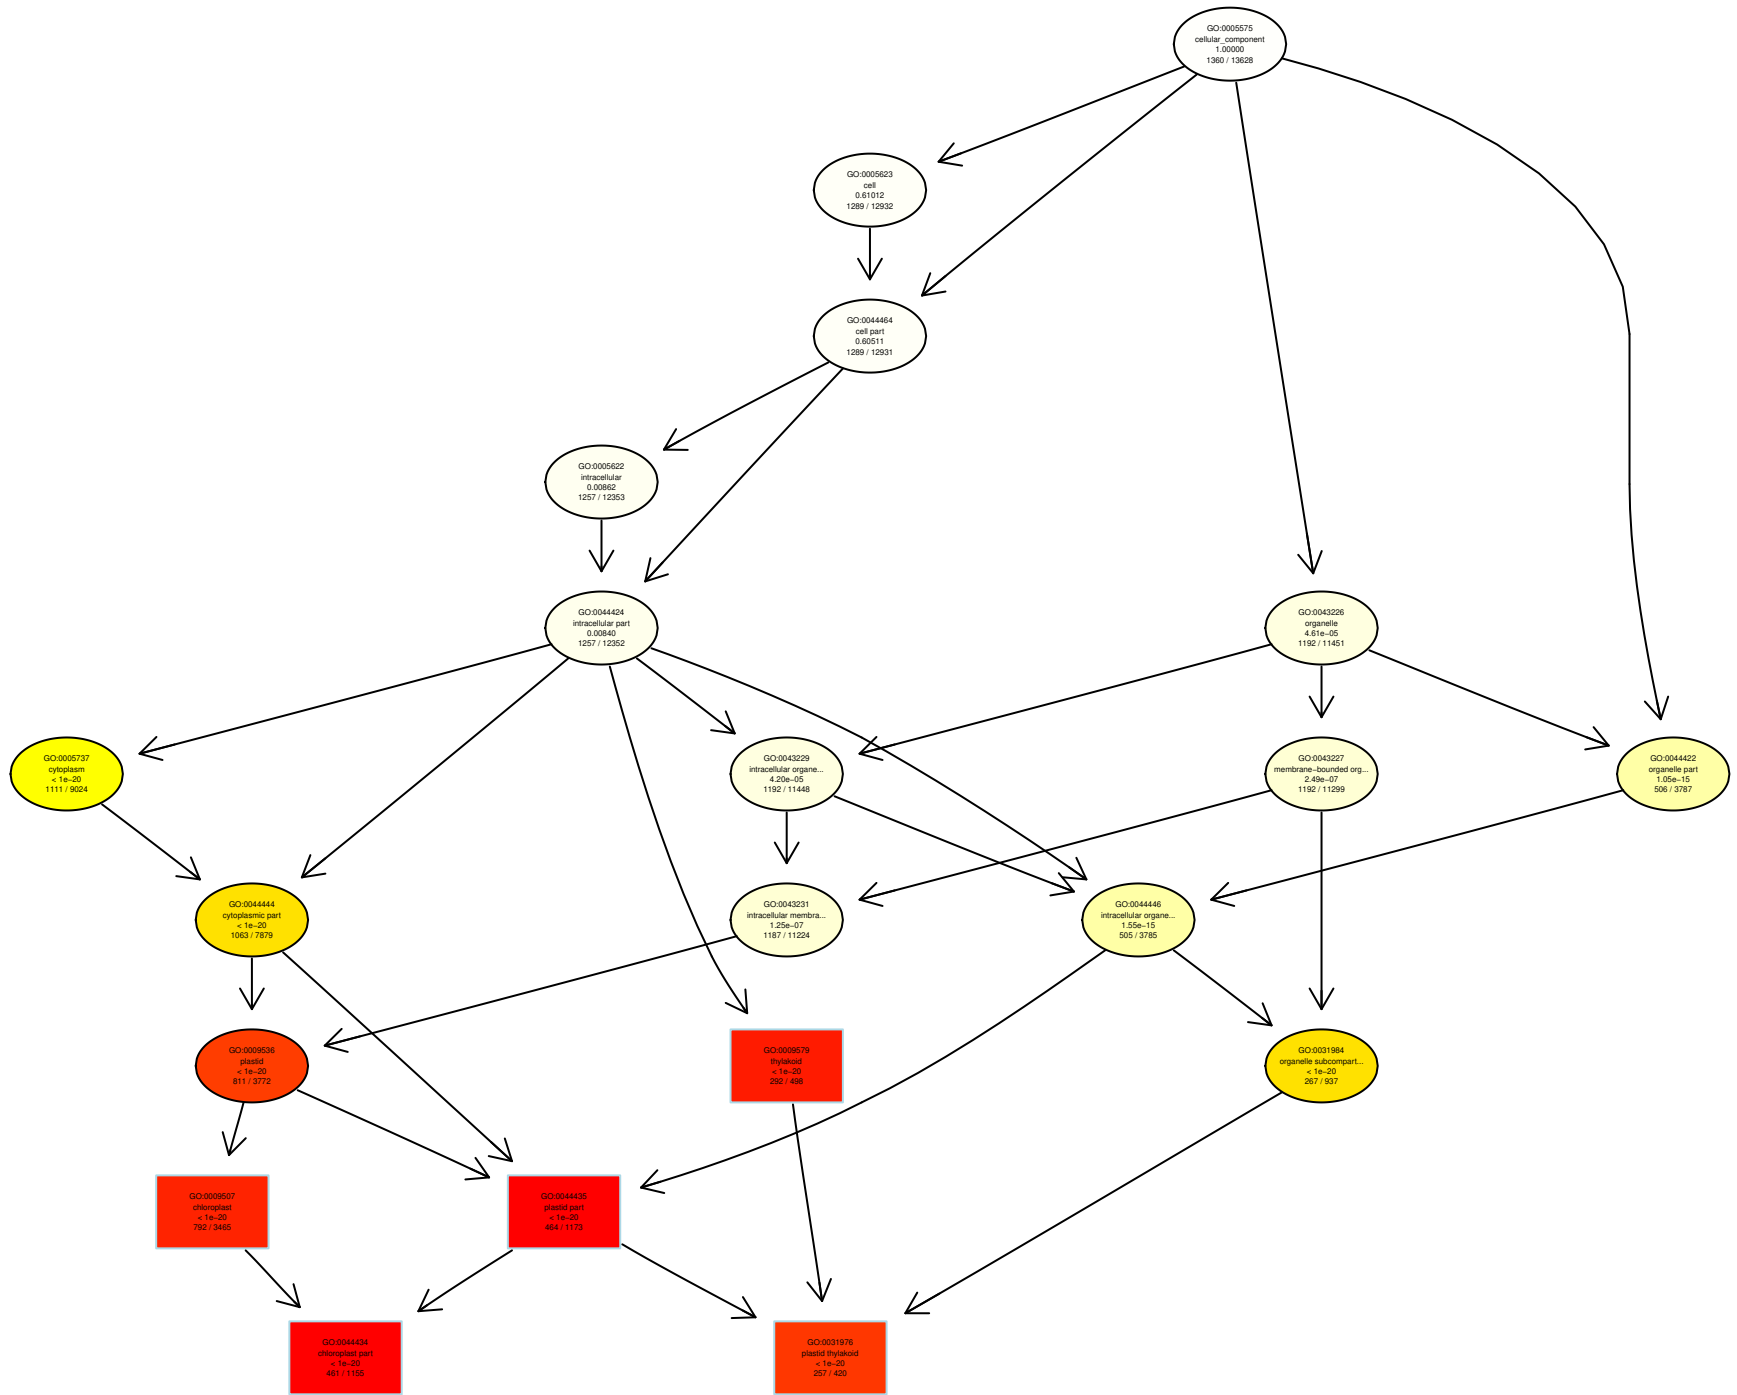

Supplement: PLD3-6-e396-s248.pdf [file PLD3-6-e396-s248.pdf]

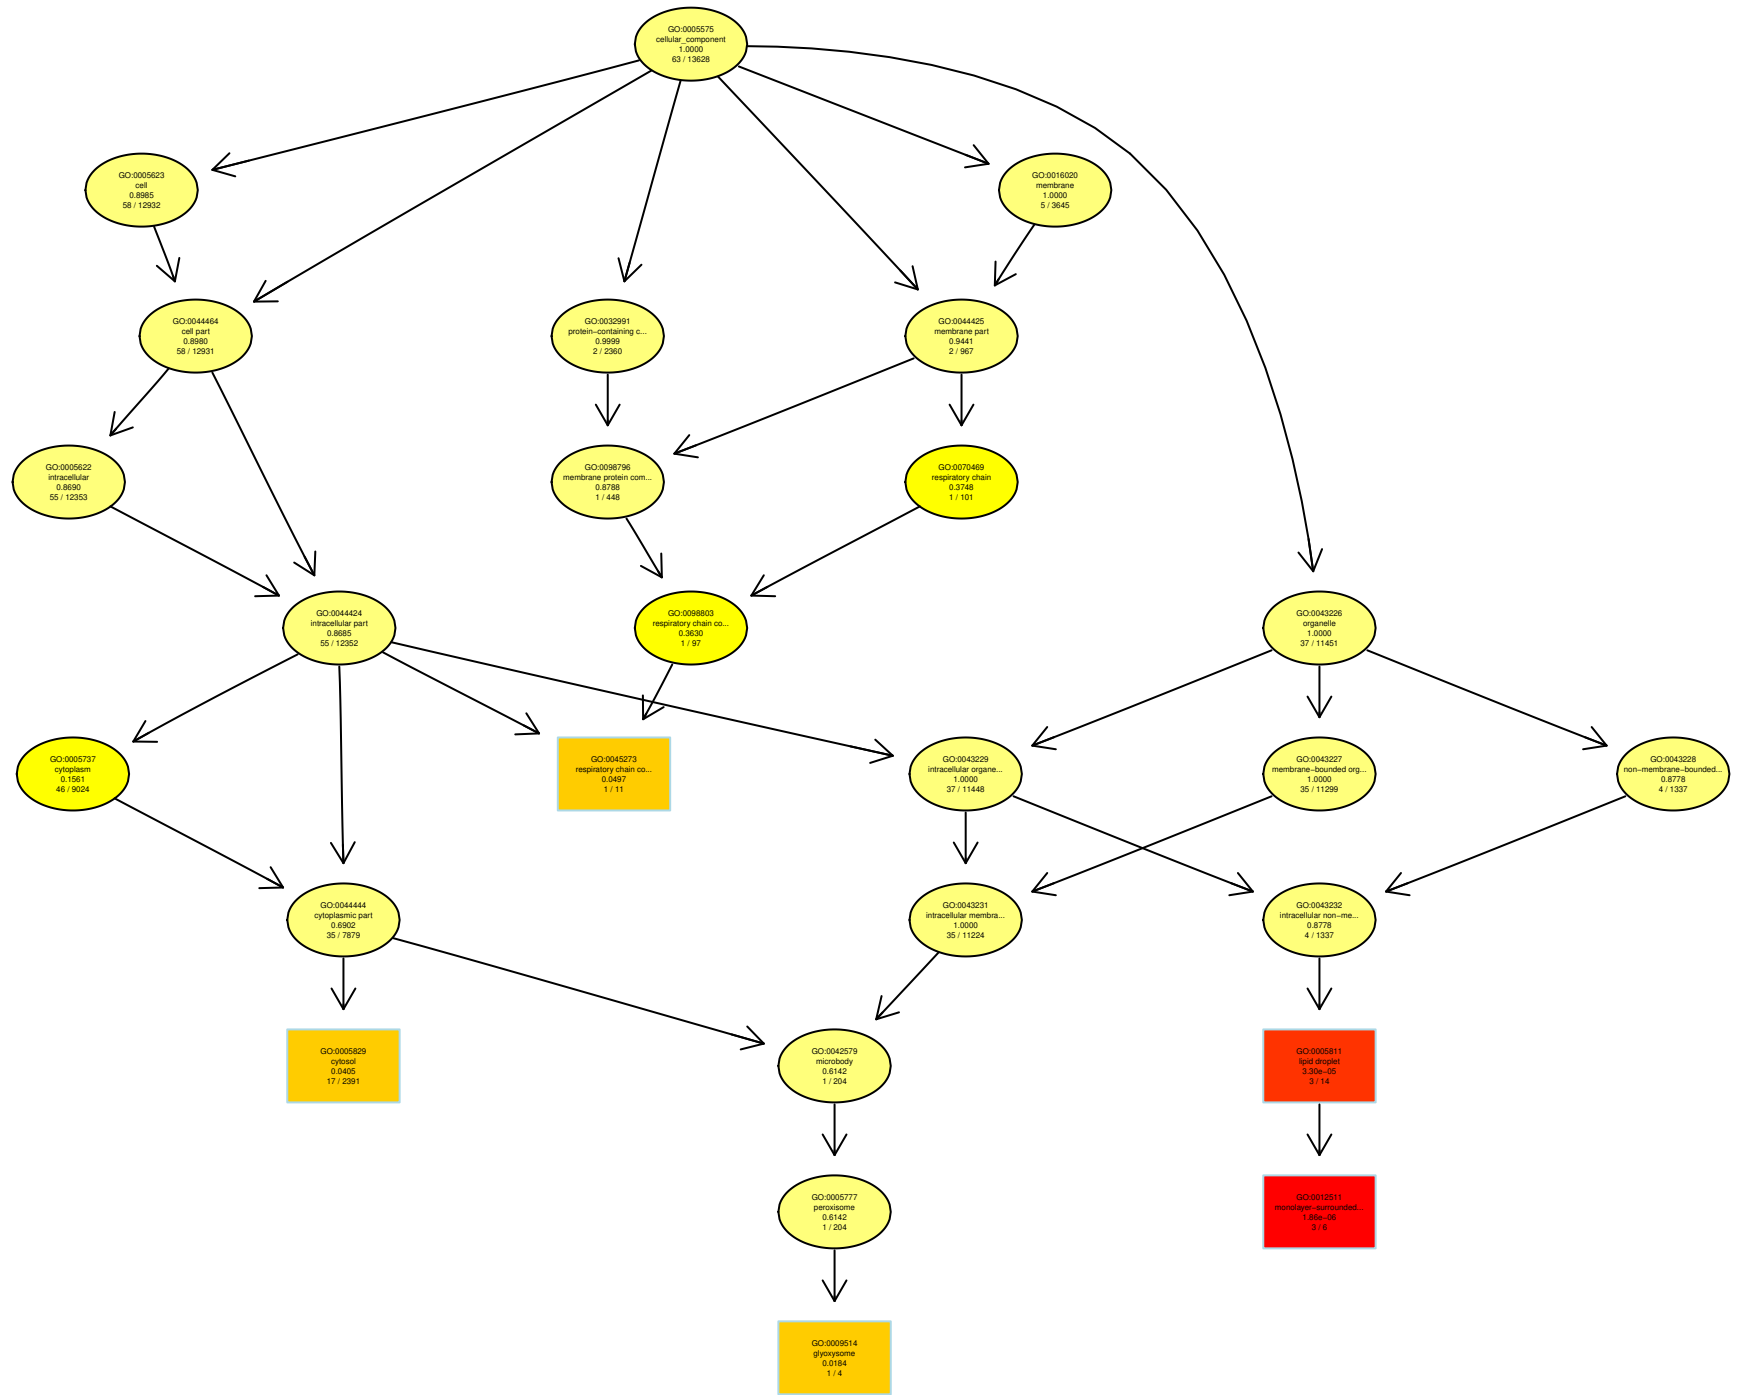

Supplement: PLD3-6-e396-s251.pdf [file PLD3-6-e396-s251.pdf]

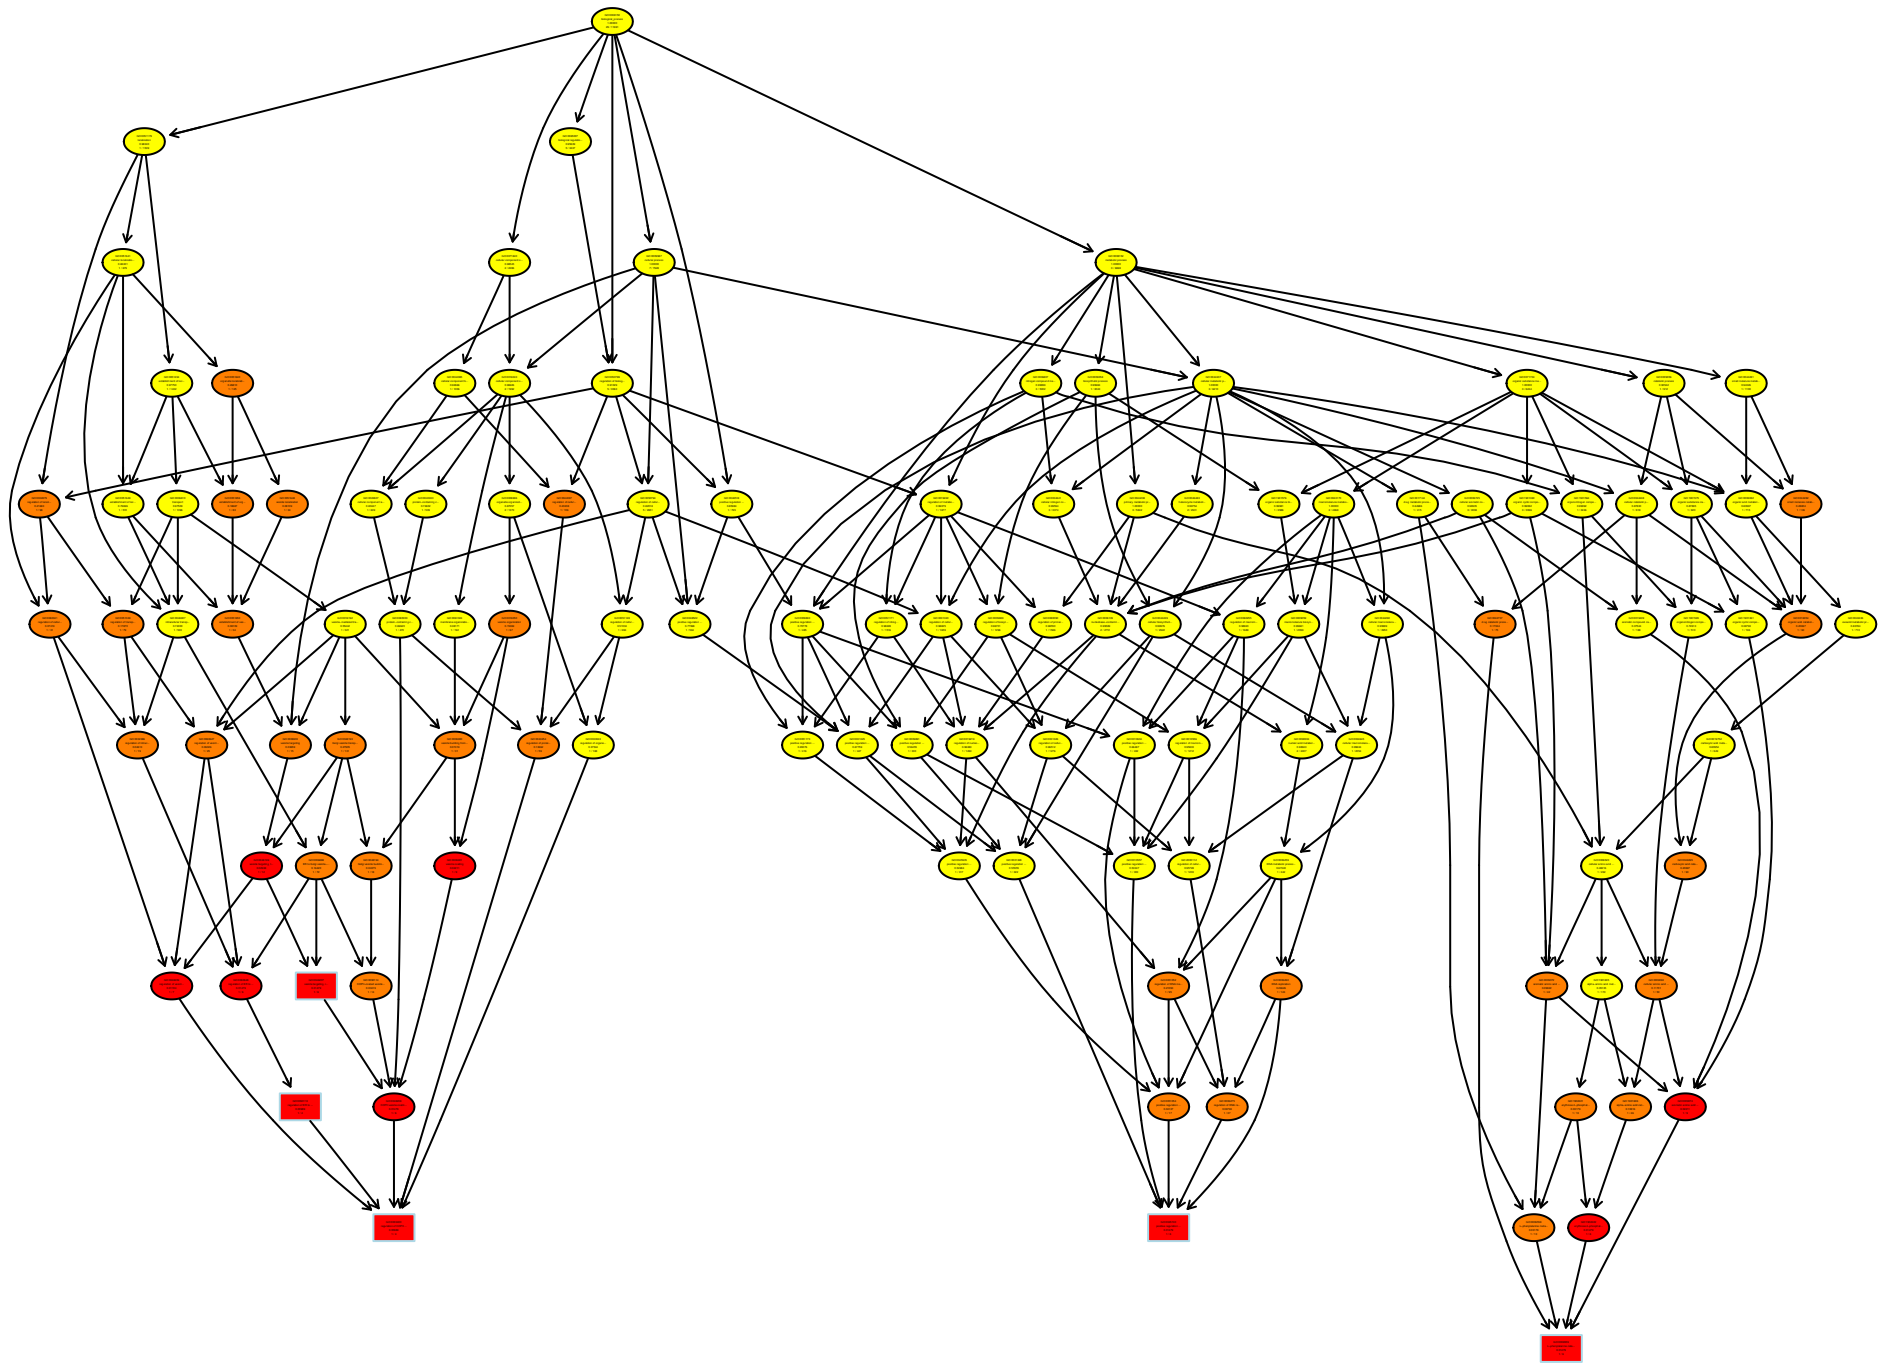

Supplement: PLD3-6-e396-s253.pdf [file PLD3-6-e396-s253.pdf]

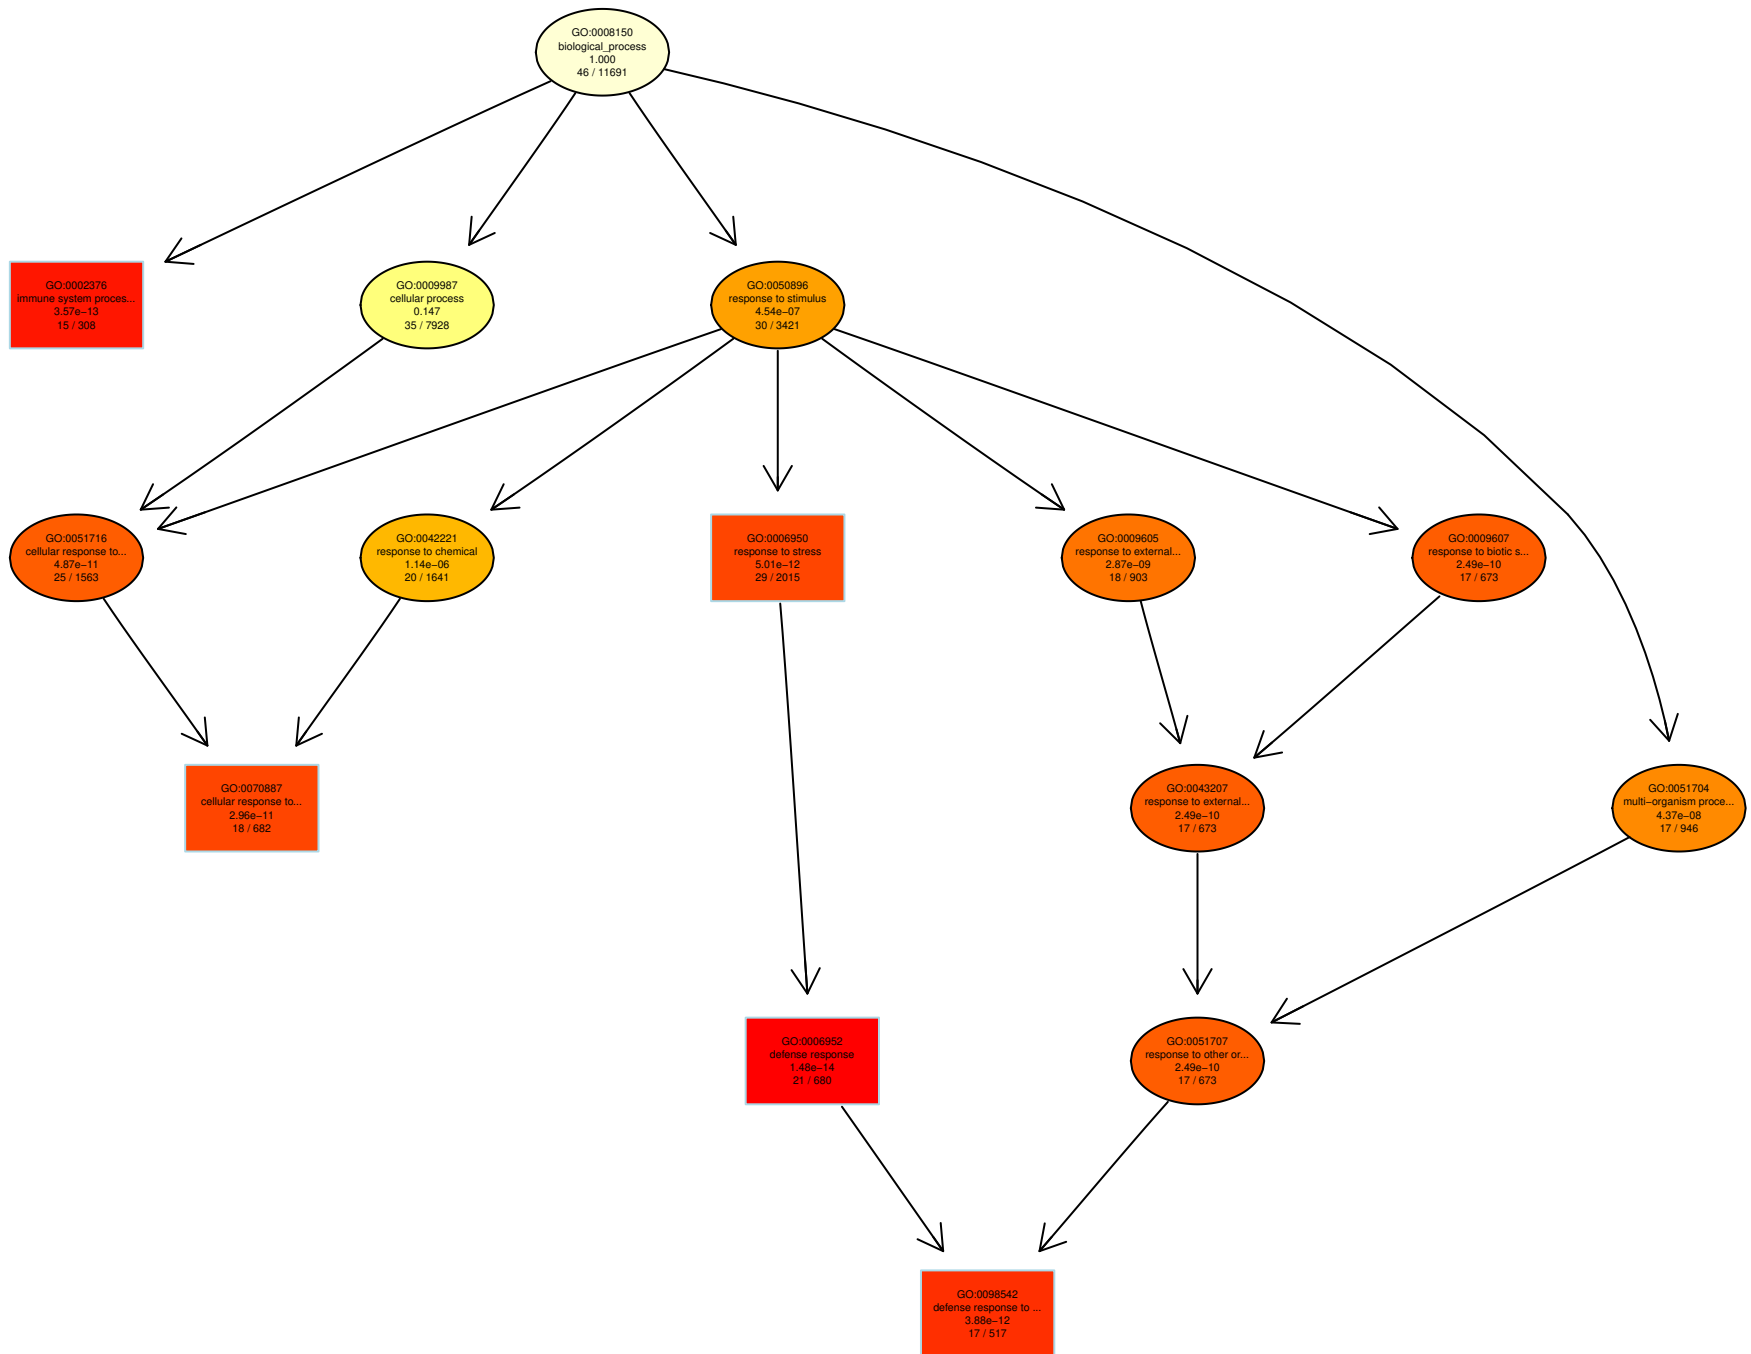

Supplement: PLD3-6-e396-s256.pdf [file PLD3-6-e396-s256.pdf]
