# Supplementary figures and images for: The Arabidopsis gene co‐expression network (part 2 of 2)
Source: PubMed Central journal article supplement — Plant Direct. 2022 Apr 26;6(4):e396. doi: 10.1002/pld3.396 (PMC9039629; doi:10.1002/pld3.396), 2022-04-26

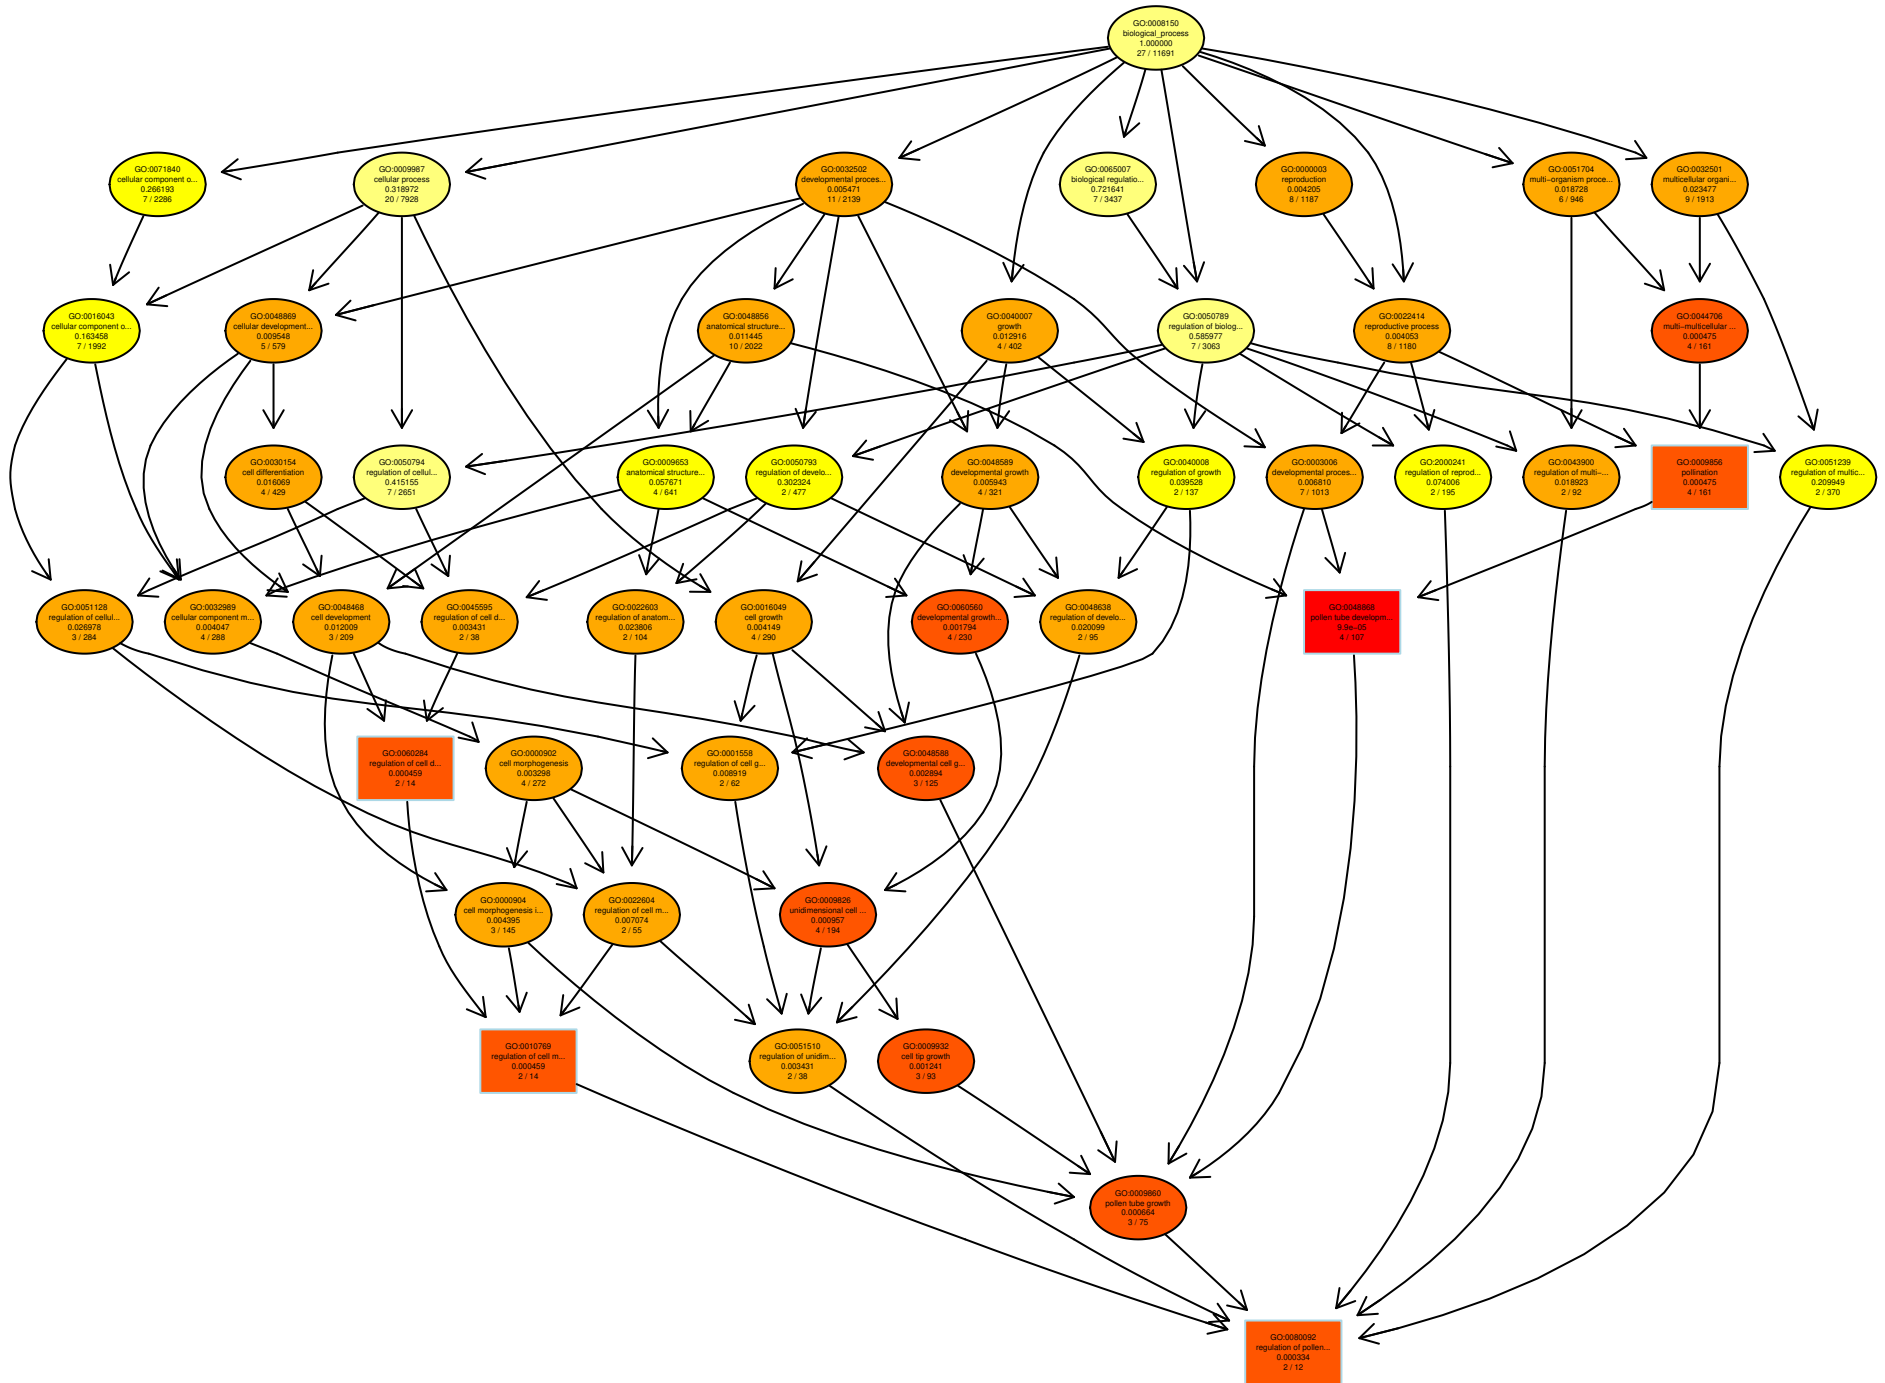

Supplement: PLD3-6-e396-s257.pdf [file PLD3-6-e396-s257.pdf]

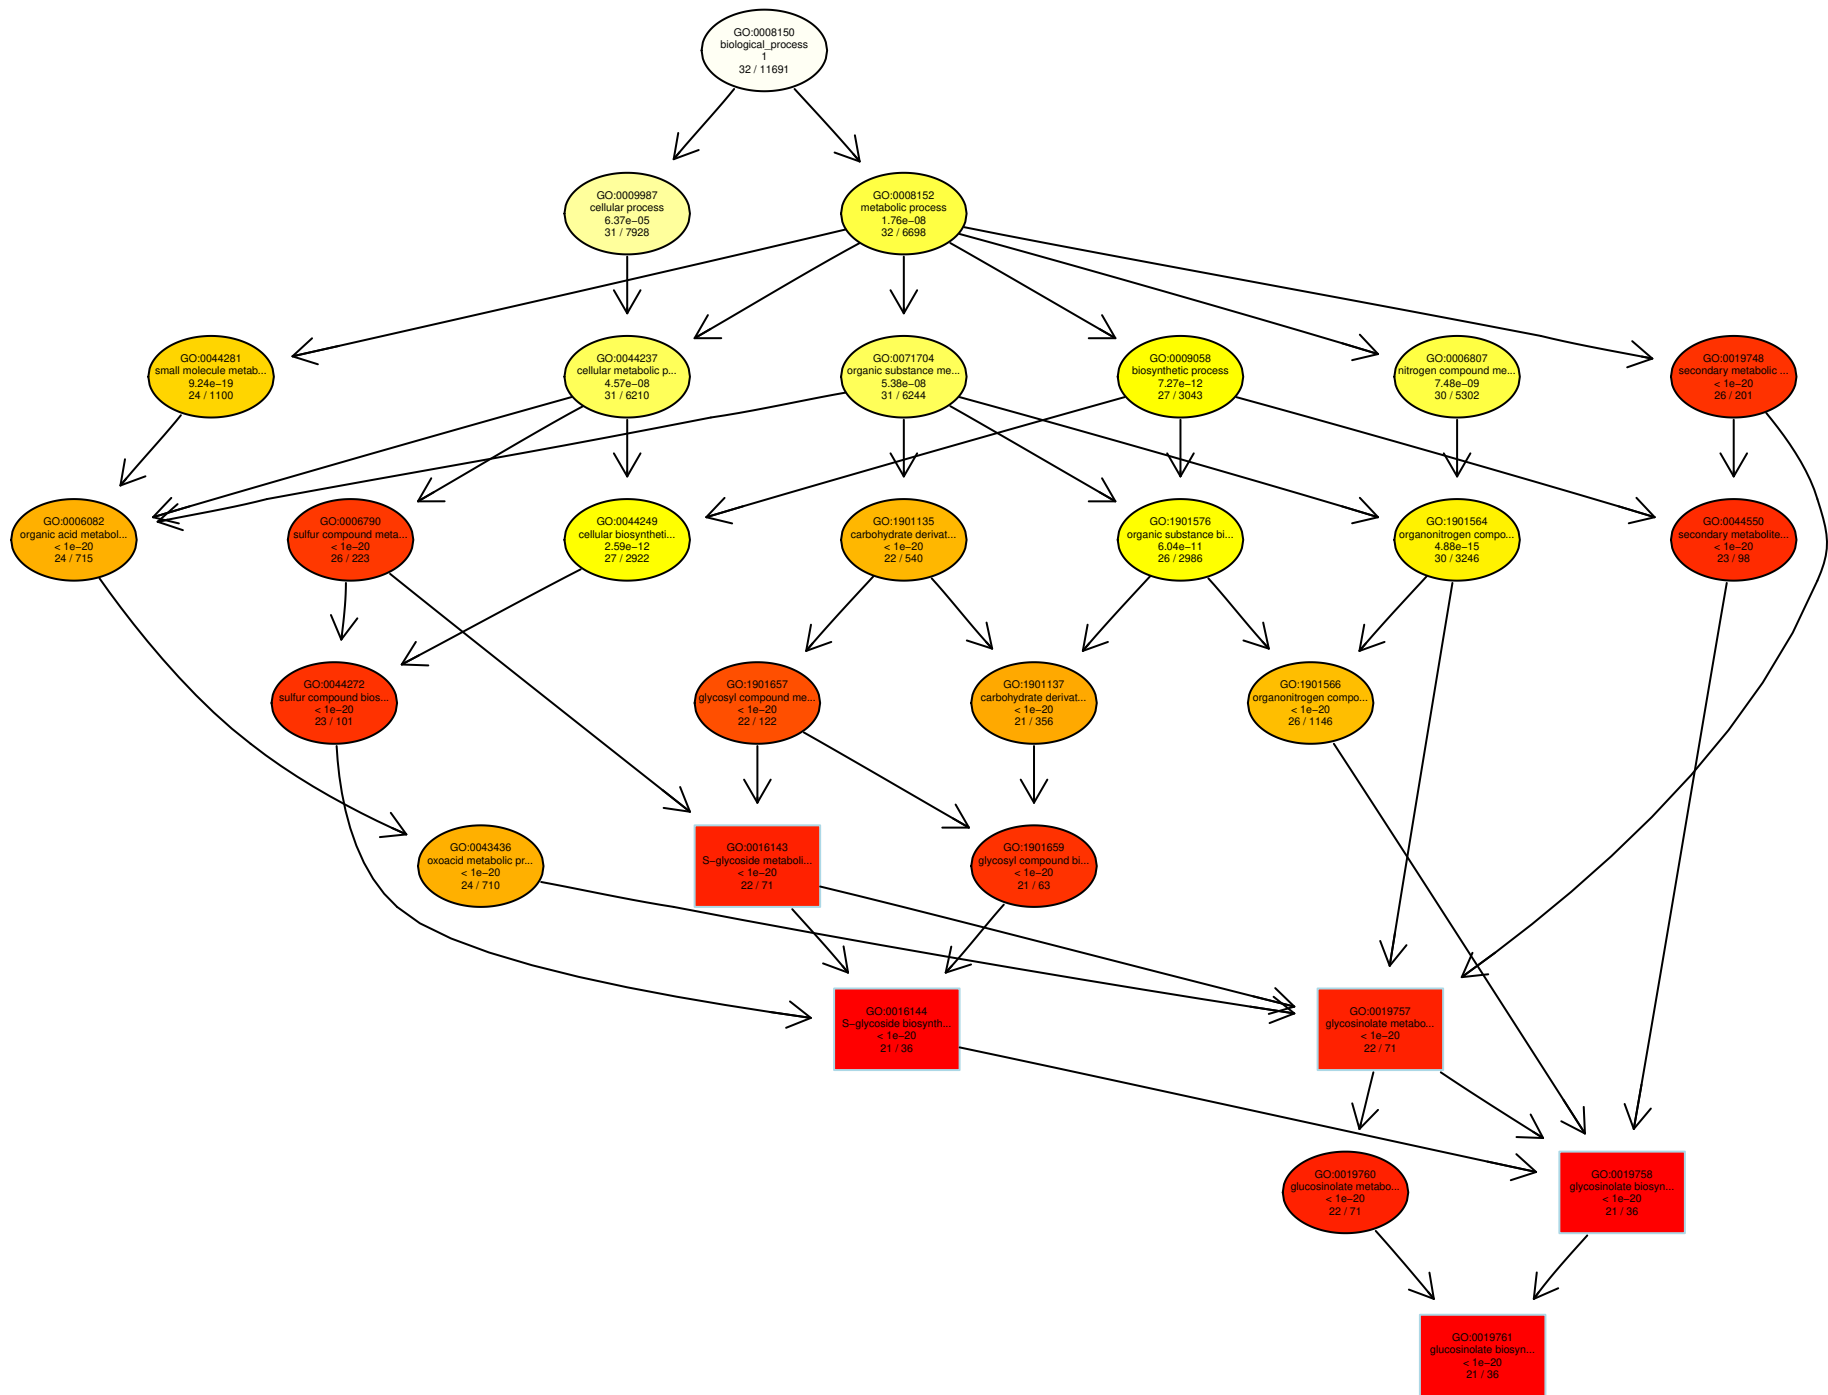

Supplement: PLD3-6-e396-s259.pdf [file PLD3-6-e396-s259.pdf]

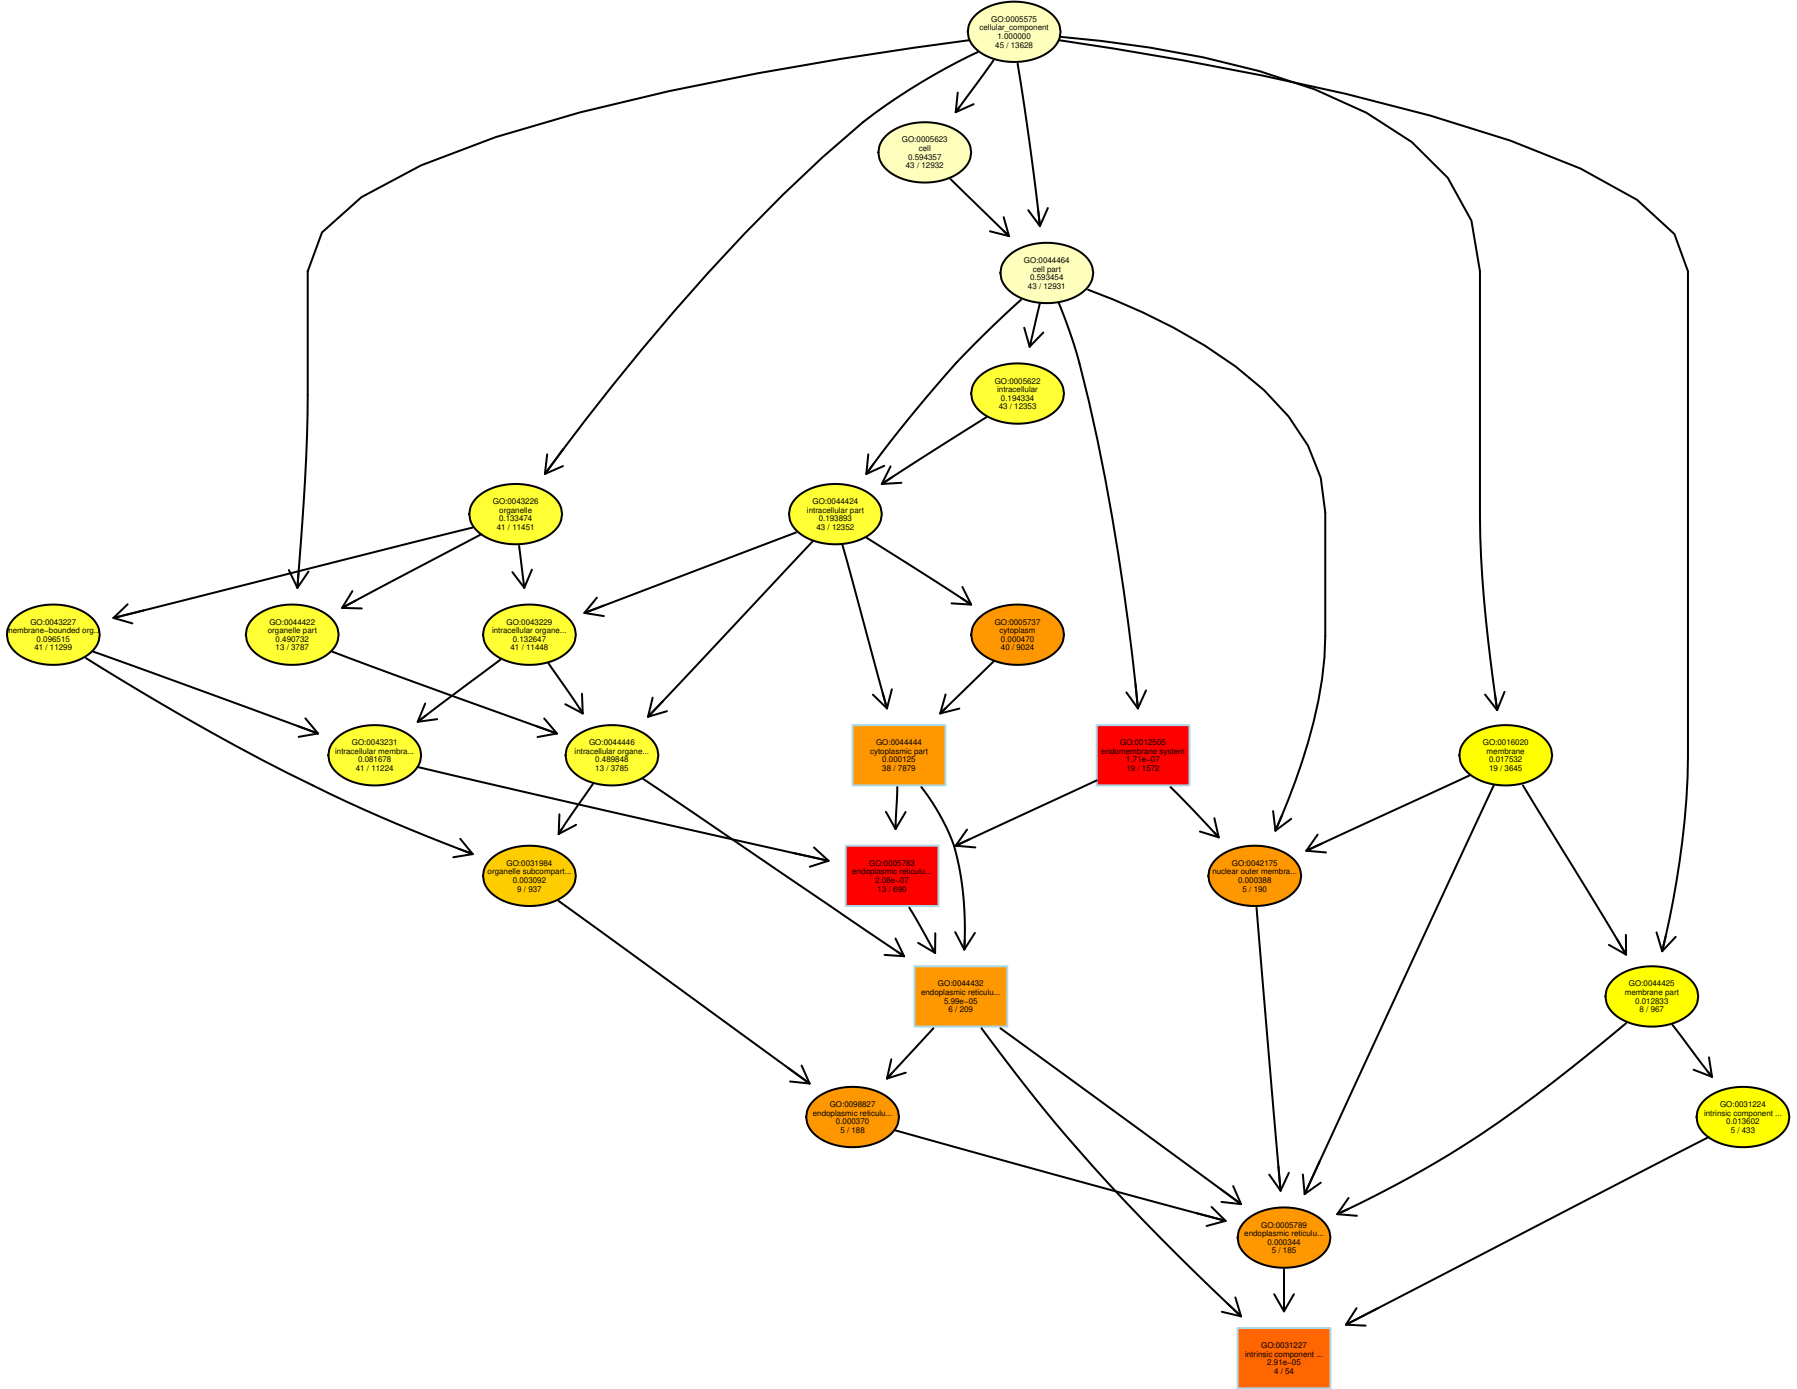

Supplement: PLD3-6-e396-s261.pdf [file PLD3-6-e396-s261.pdf]

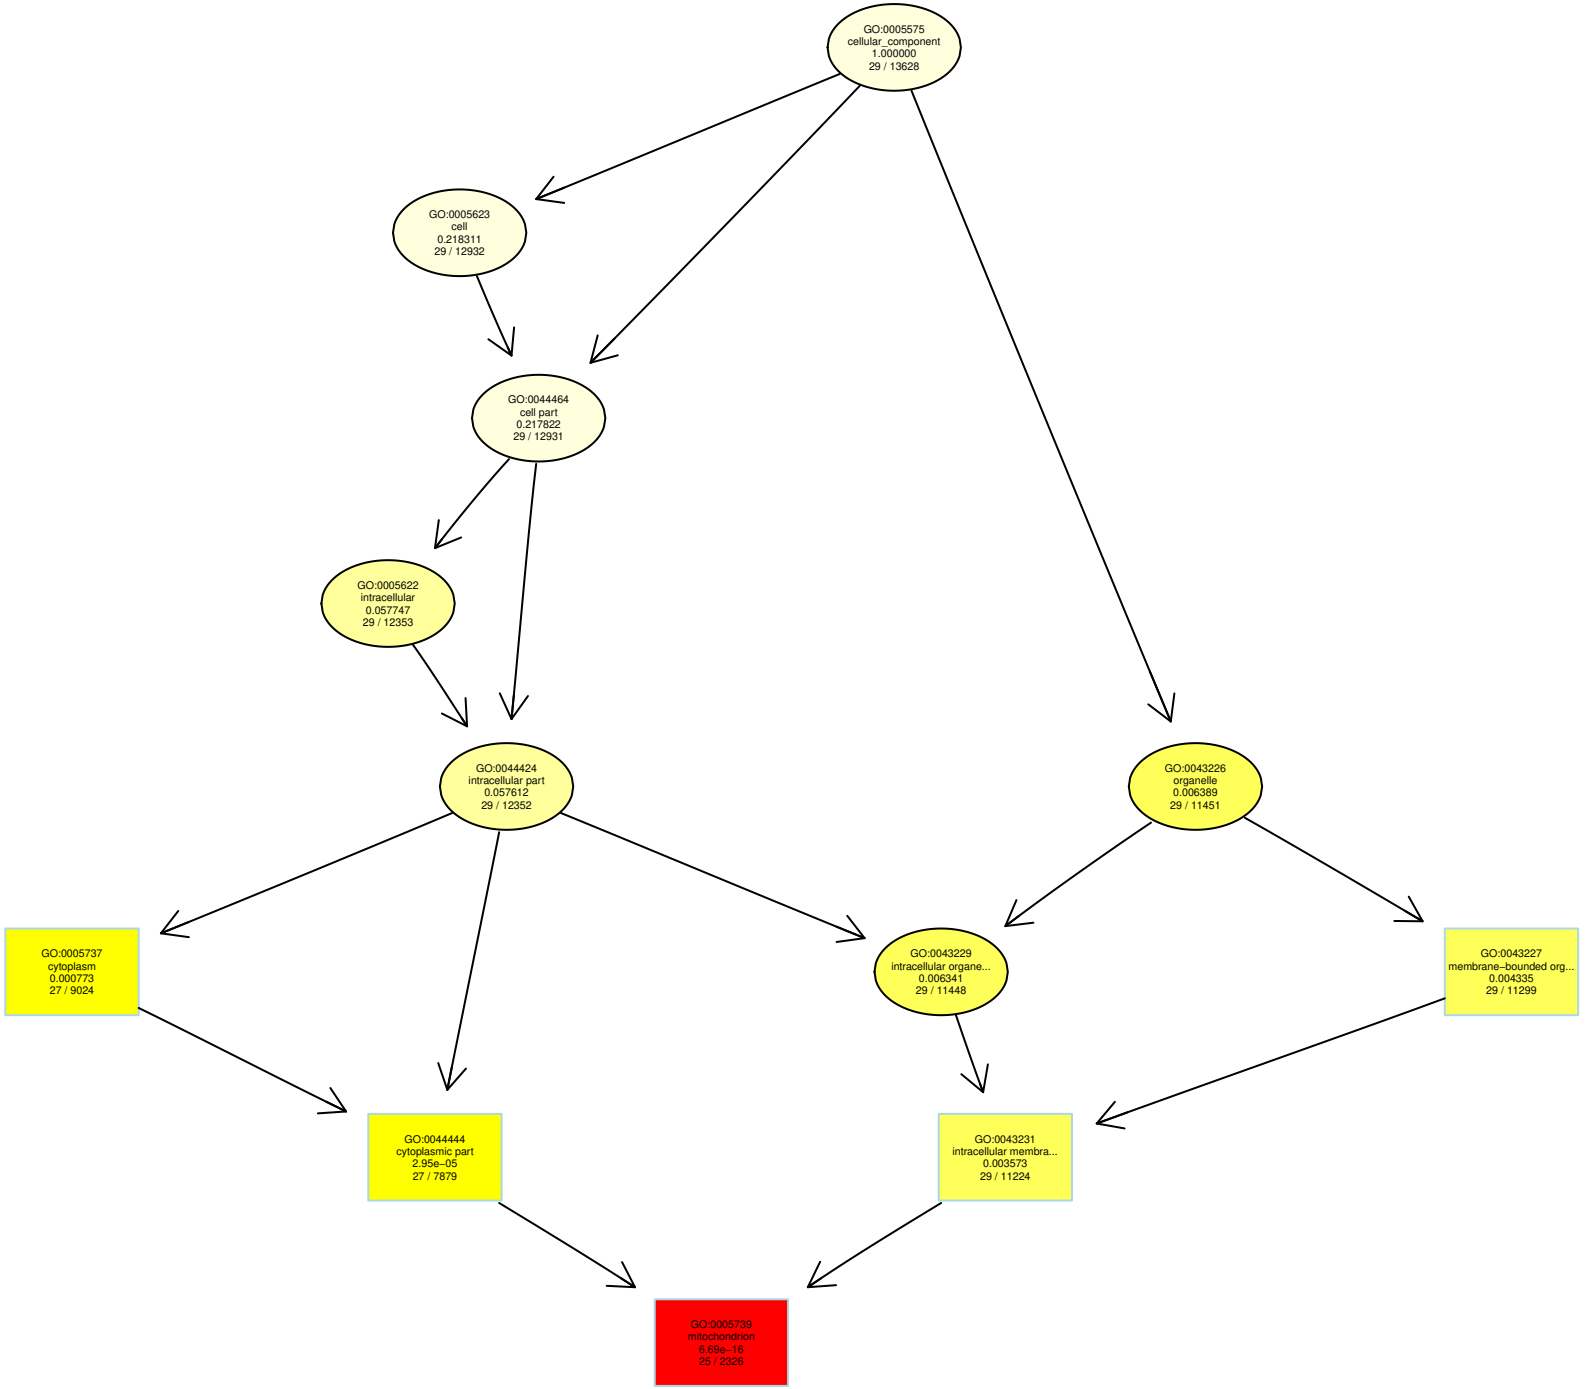

Supplement: PLD3-6-e396-s264.pdf [file PLD3-6-e396-s264.pdf]

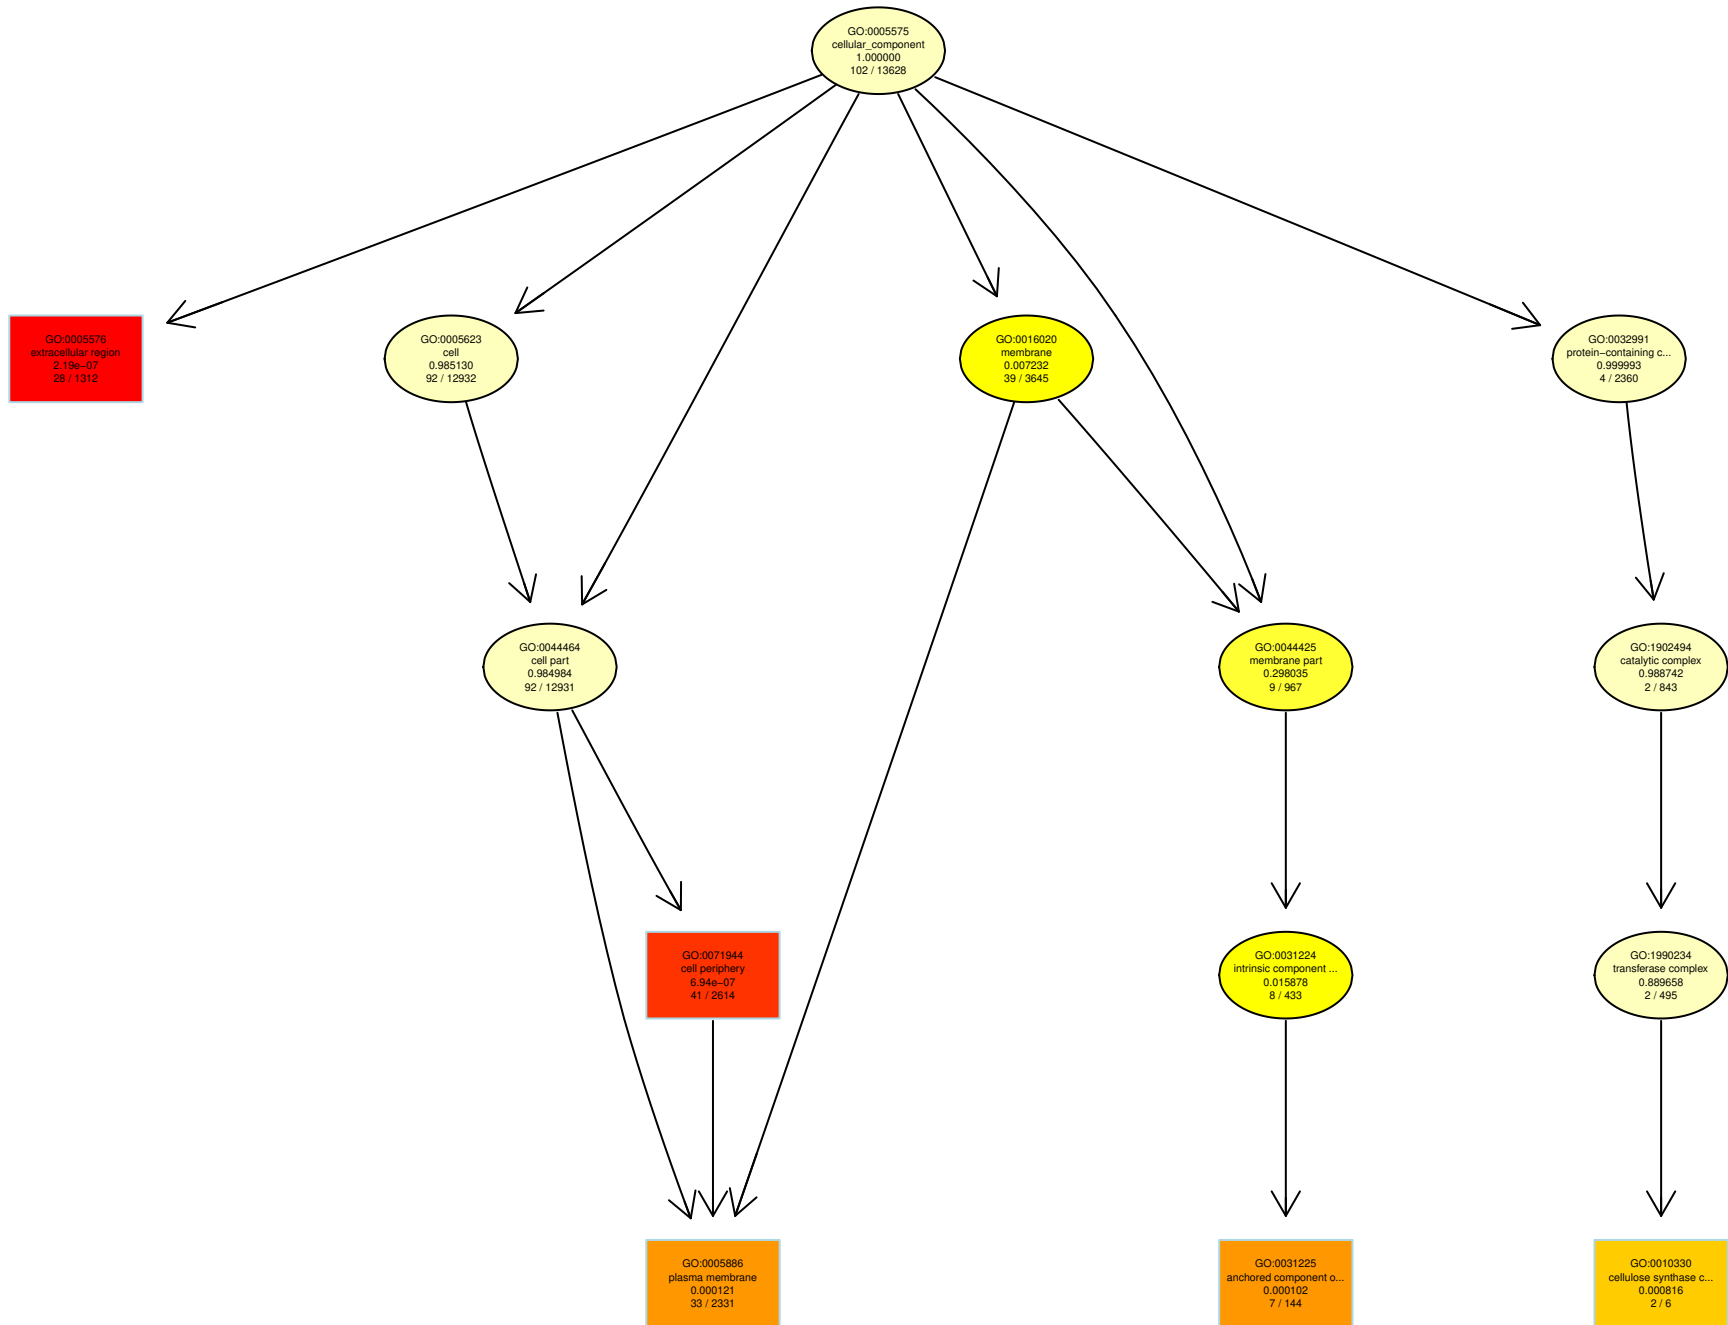

Supplement: PLD3-6-e396-s265.pdf [file PLD3-6-e396-s265.pdf]

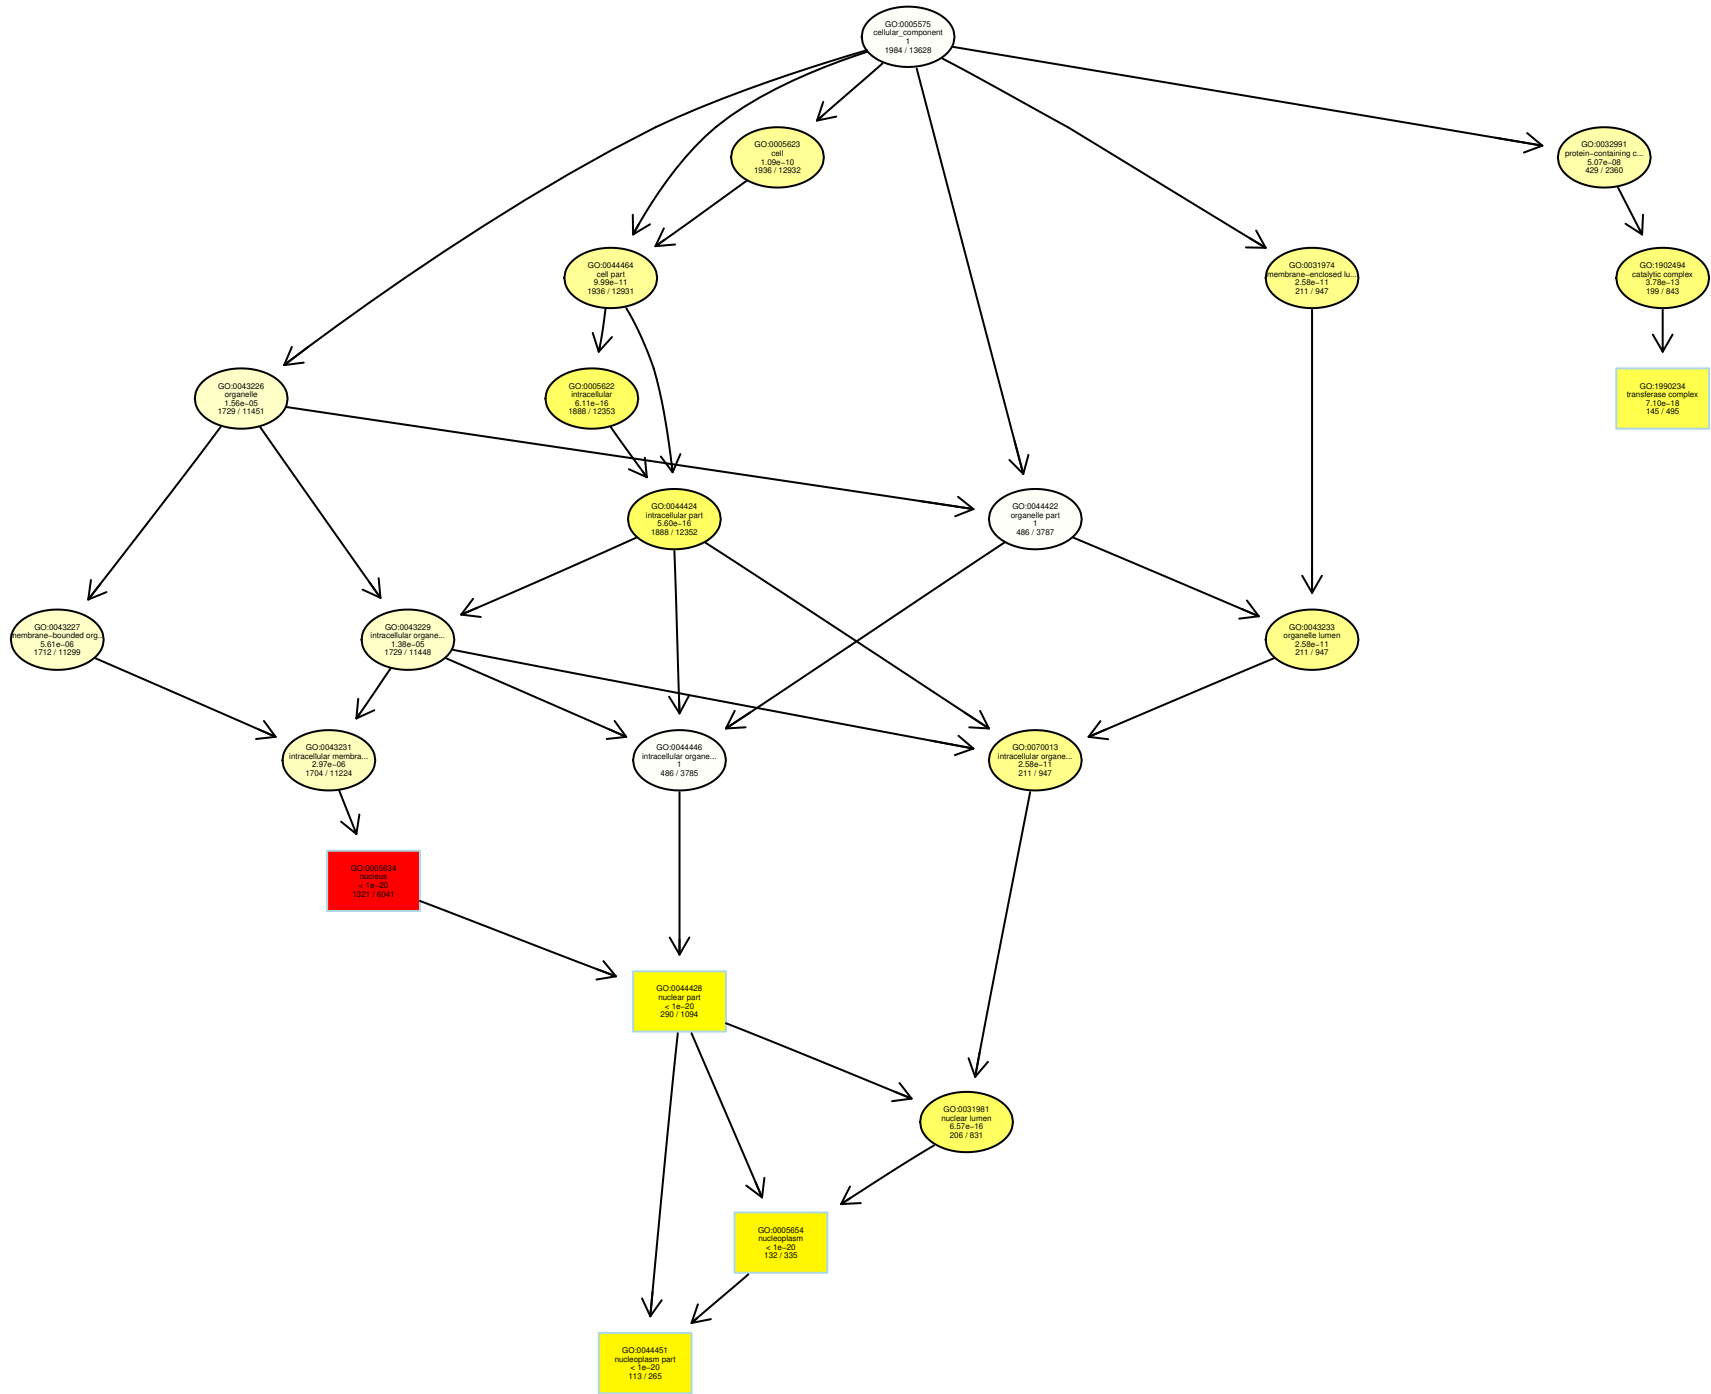

Supplement: PLD3-6-e396-s274.pdf [file PLD3-6-e396-s274.pdf]

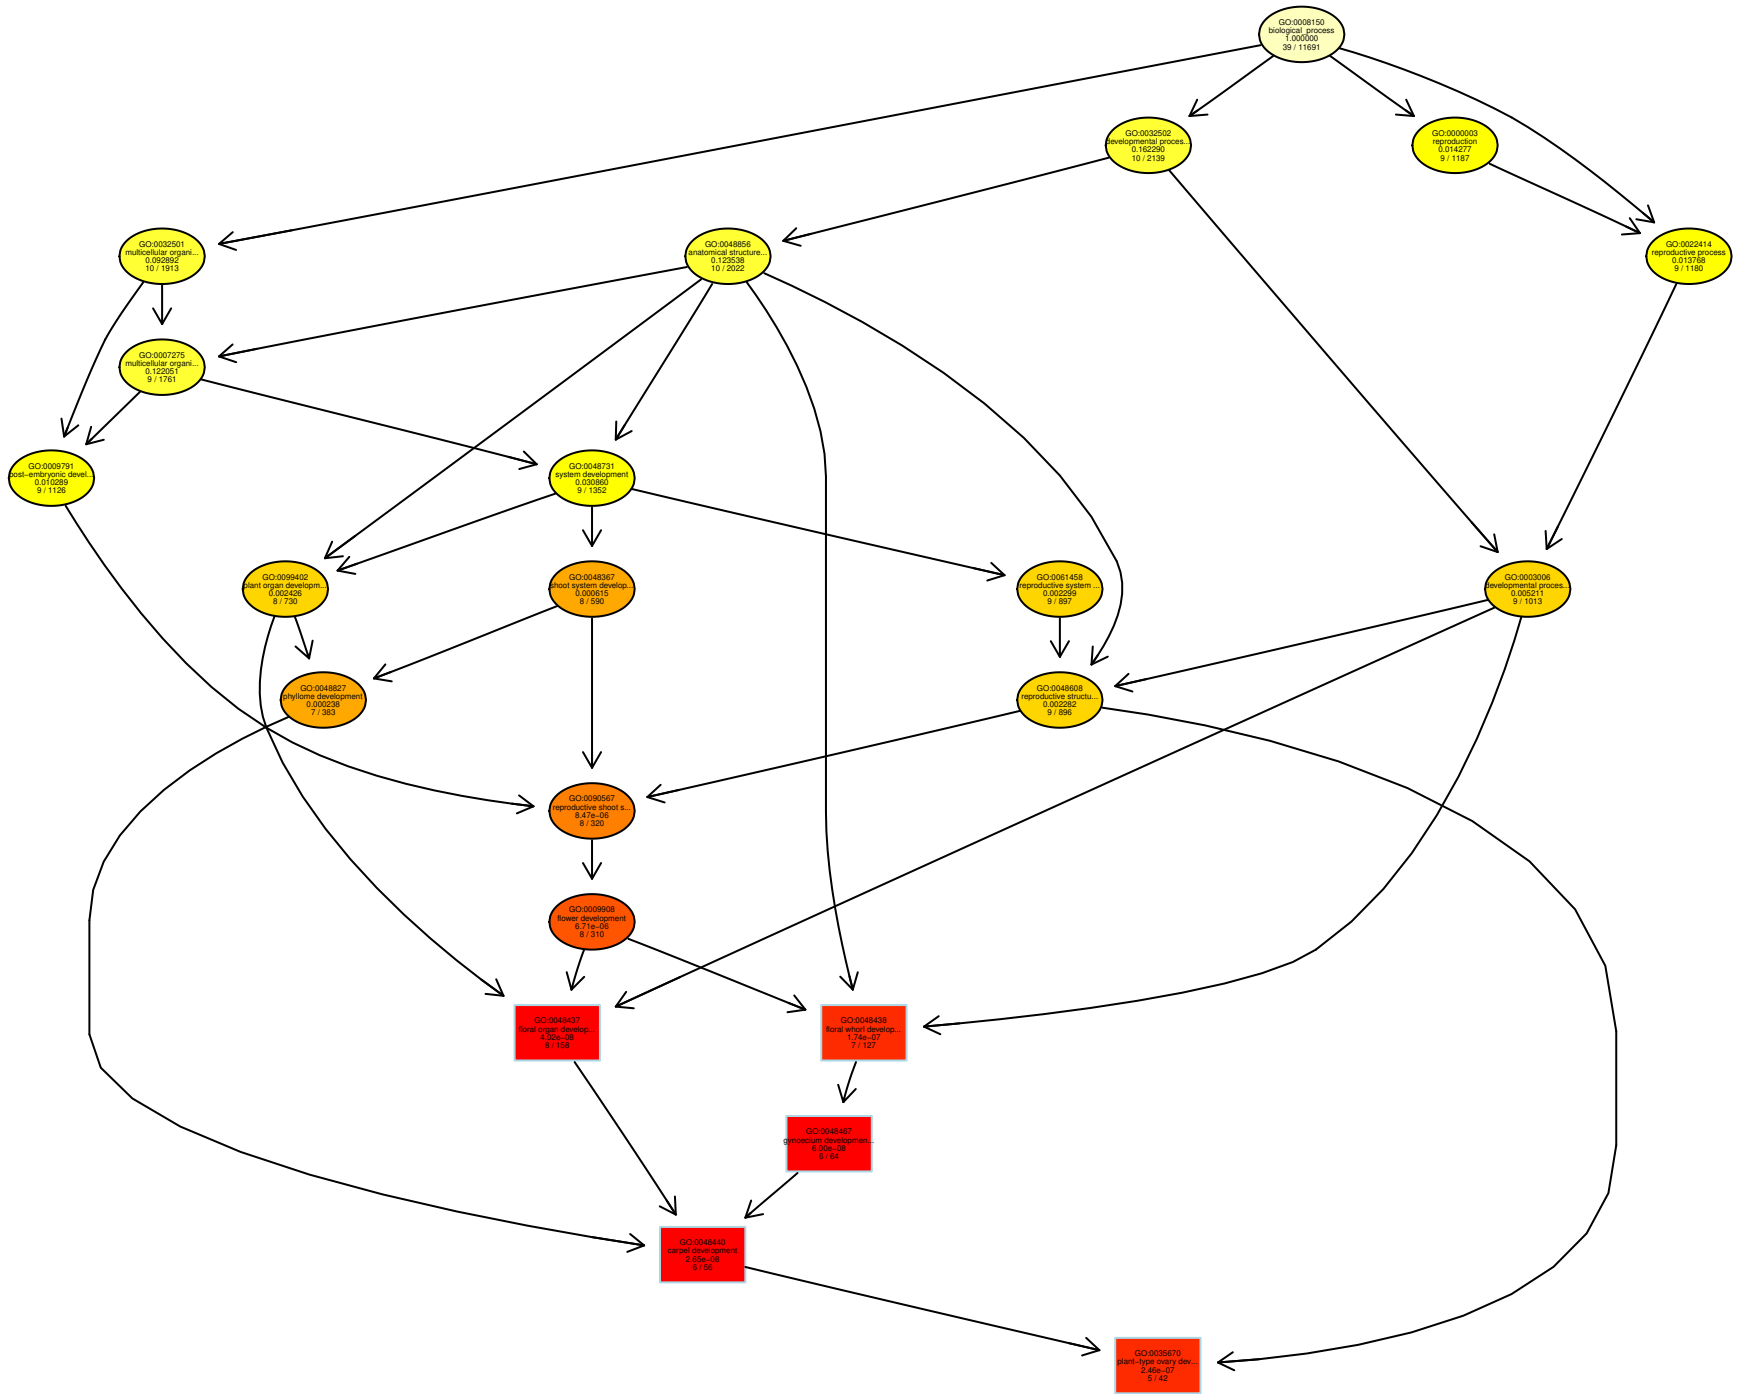

Supplement: PLD3-6-e396-s275.pdf [file PLD3-6-e396-s275.pdf]

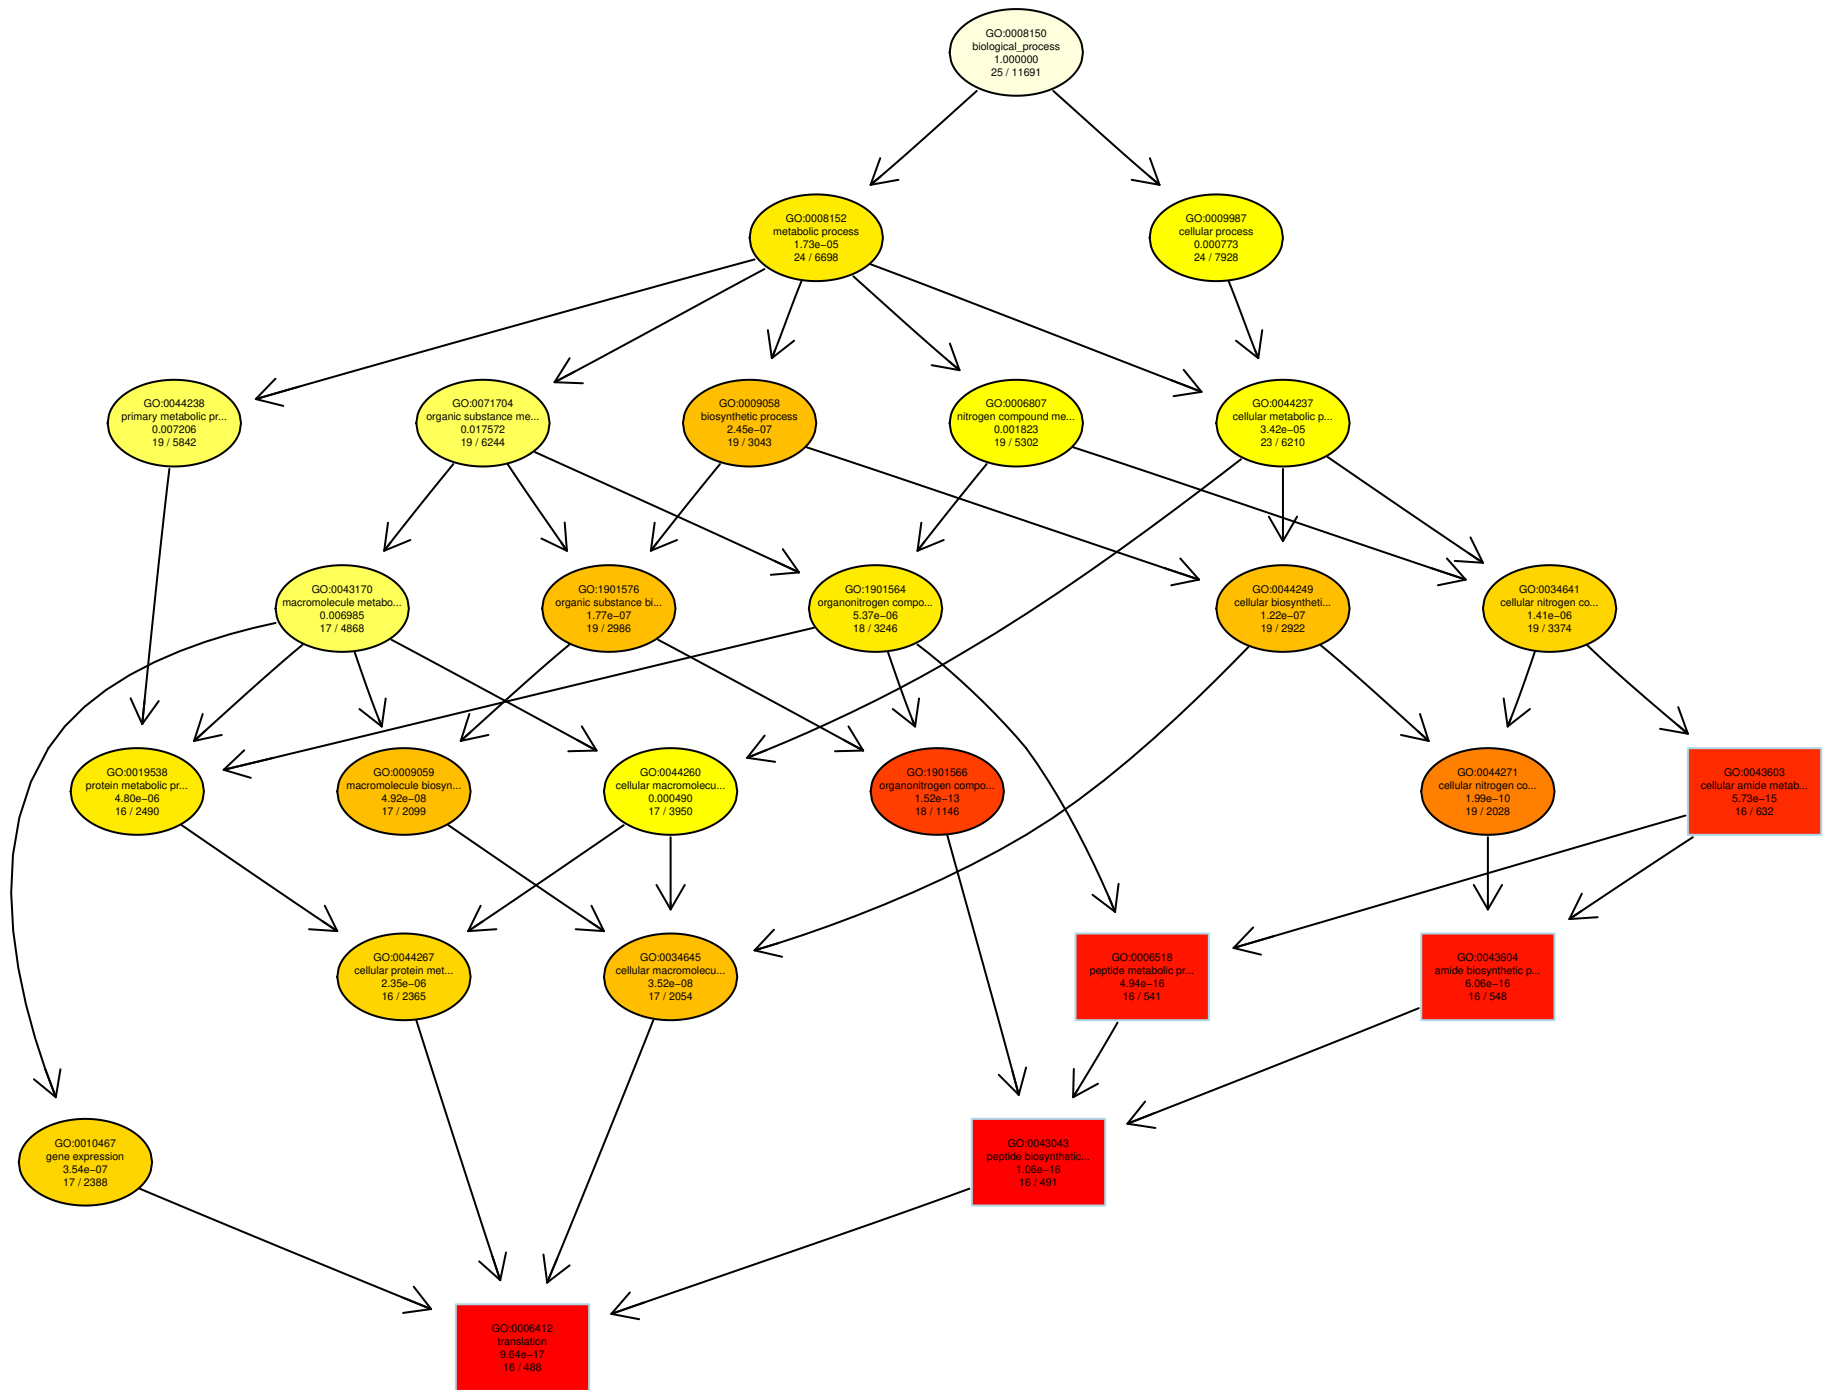

Supplement: PLD3-6-e396-s279.pdf [file PLD3-6-e396-s279.pdf]

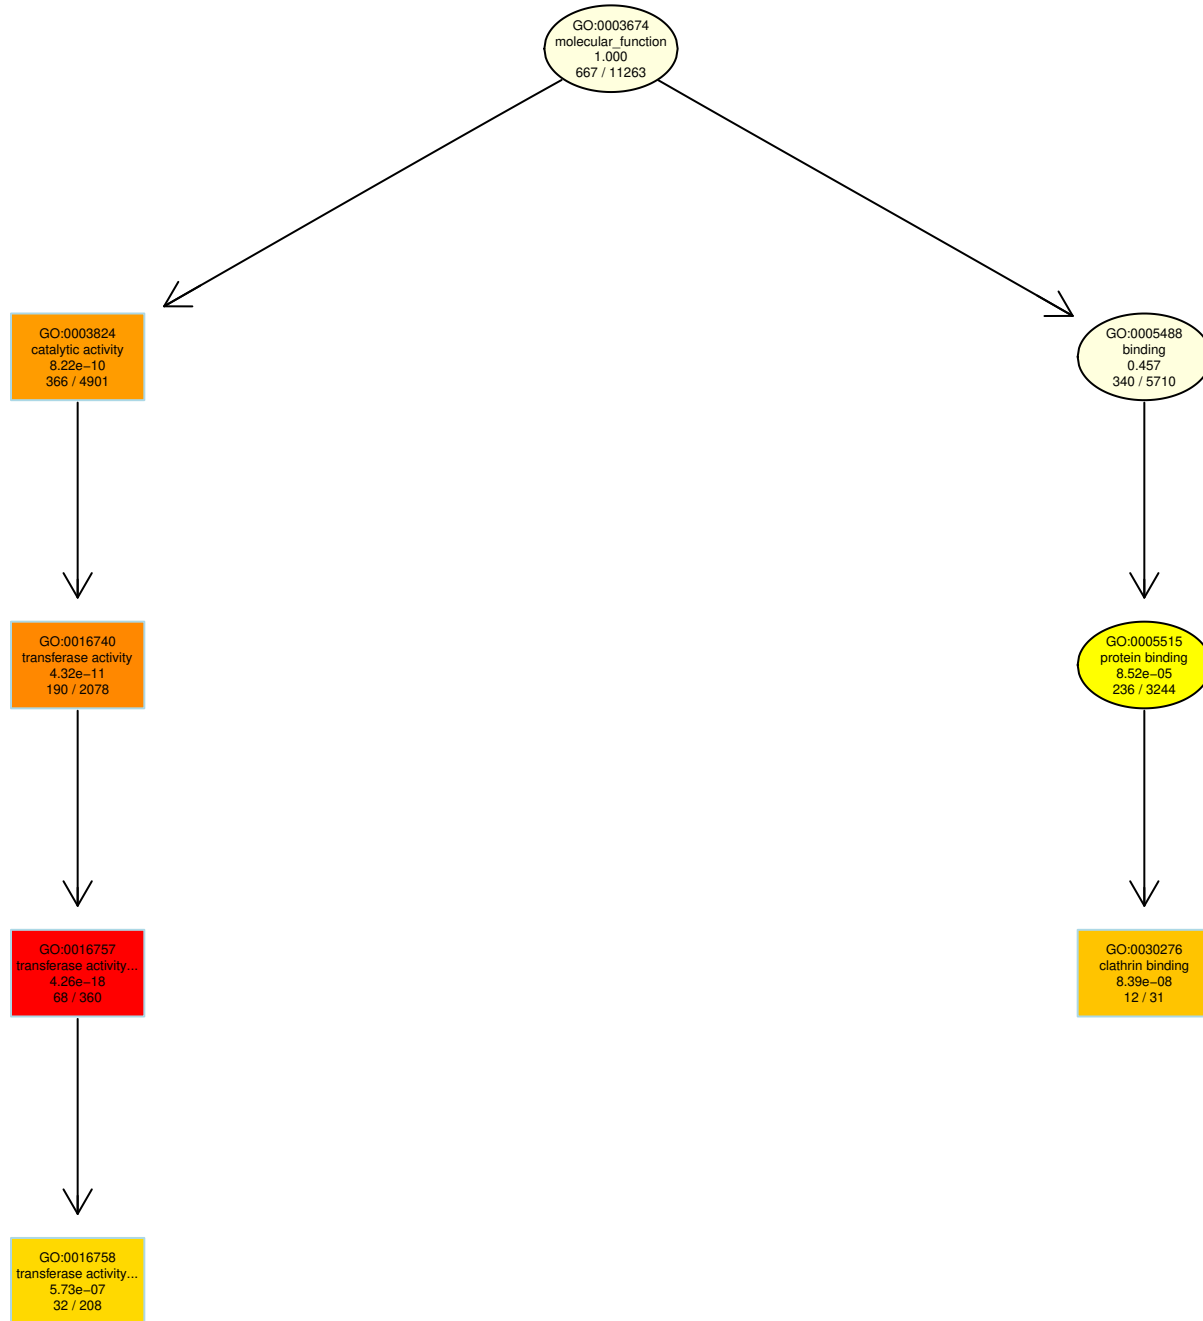

Supplement: PLD3-6-e396-s280.pdf [file PLD3-6-e396-s280.pdf]

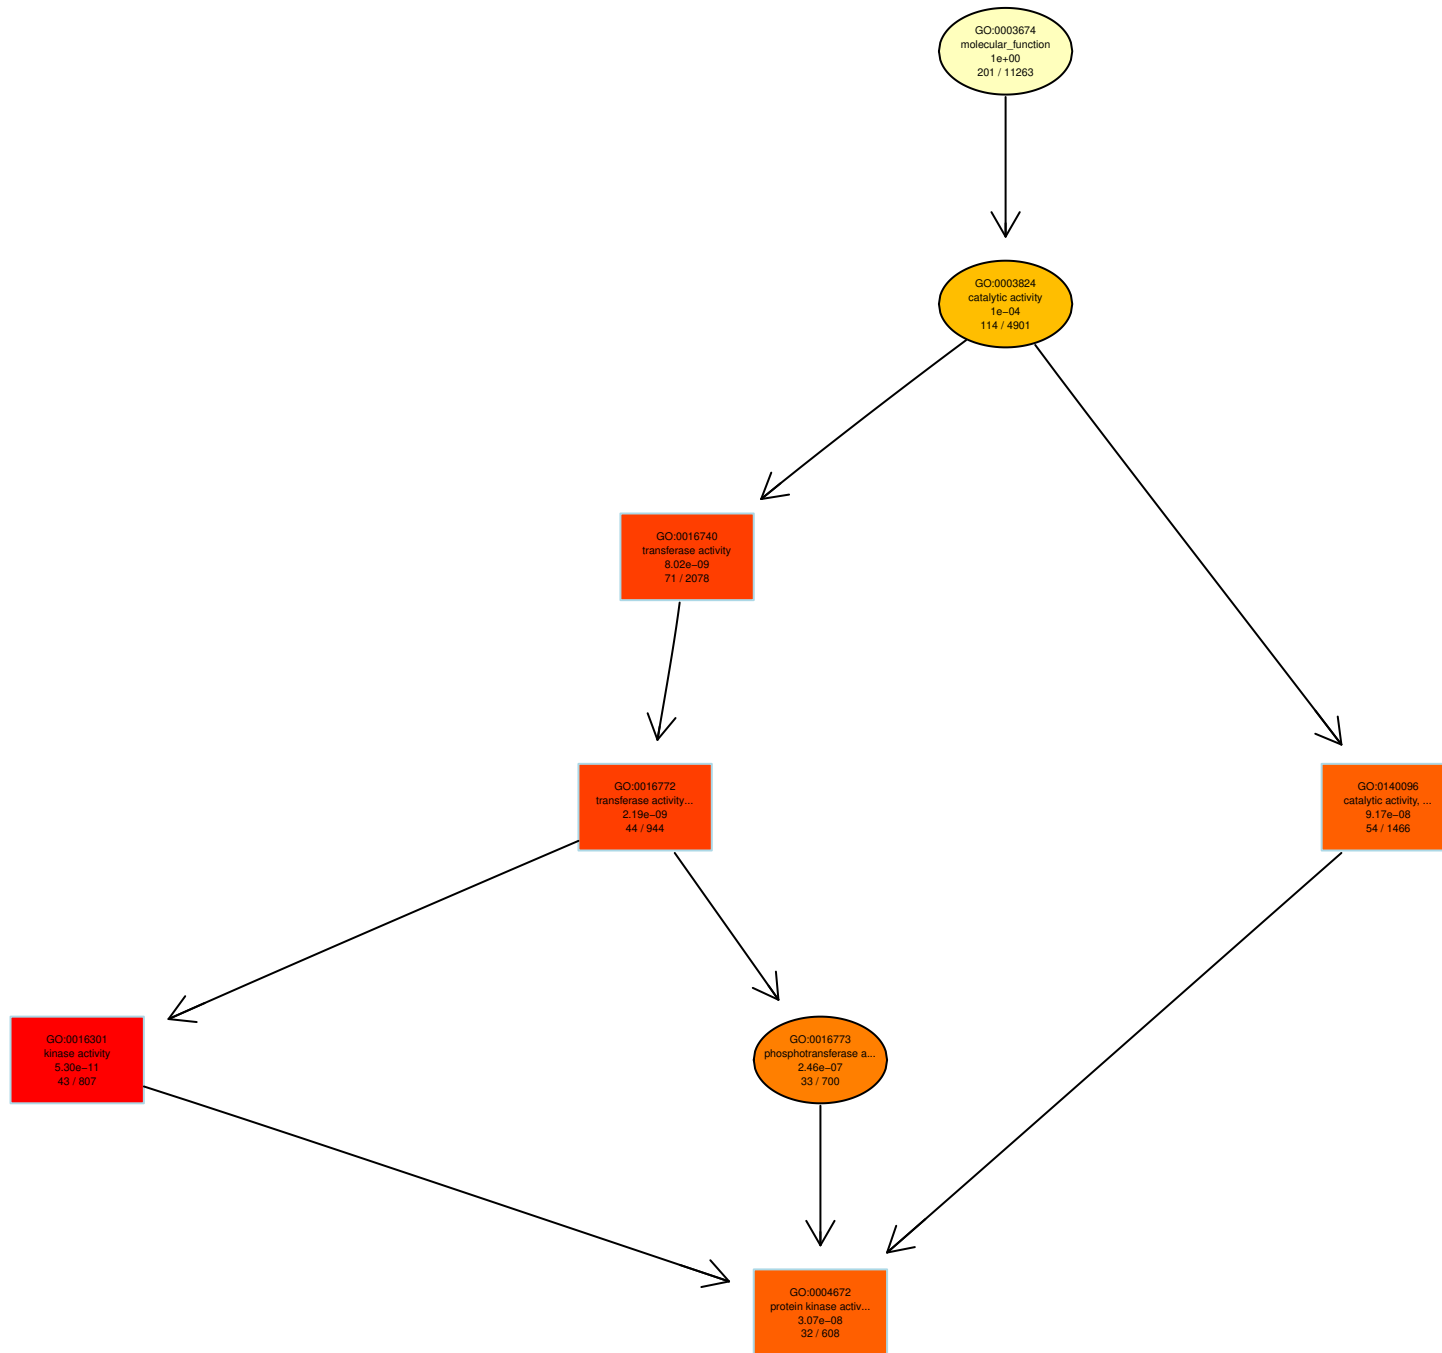

Supplement: PLD3-6-e396-s282.pdf [file PLD3-6-e396-s282.pdf]

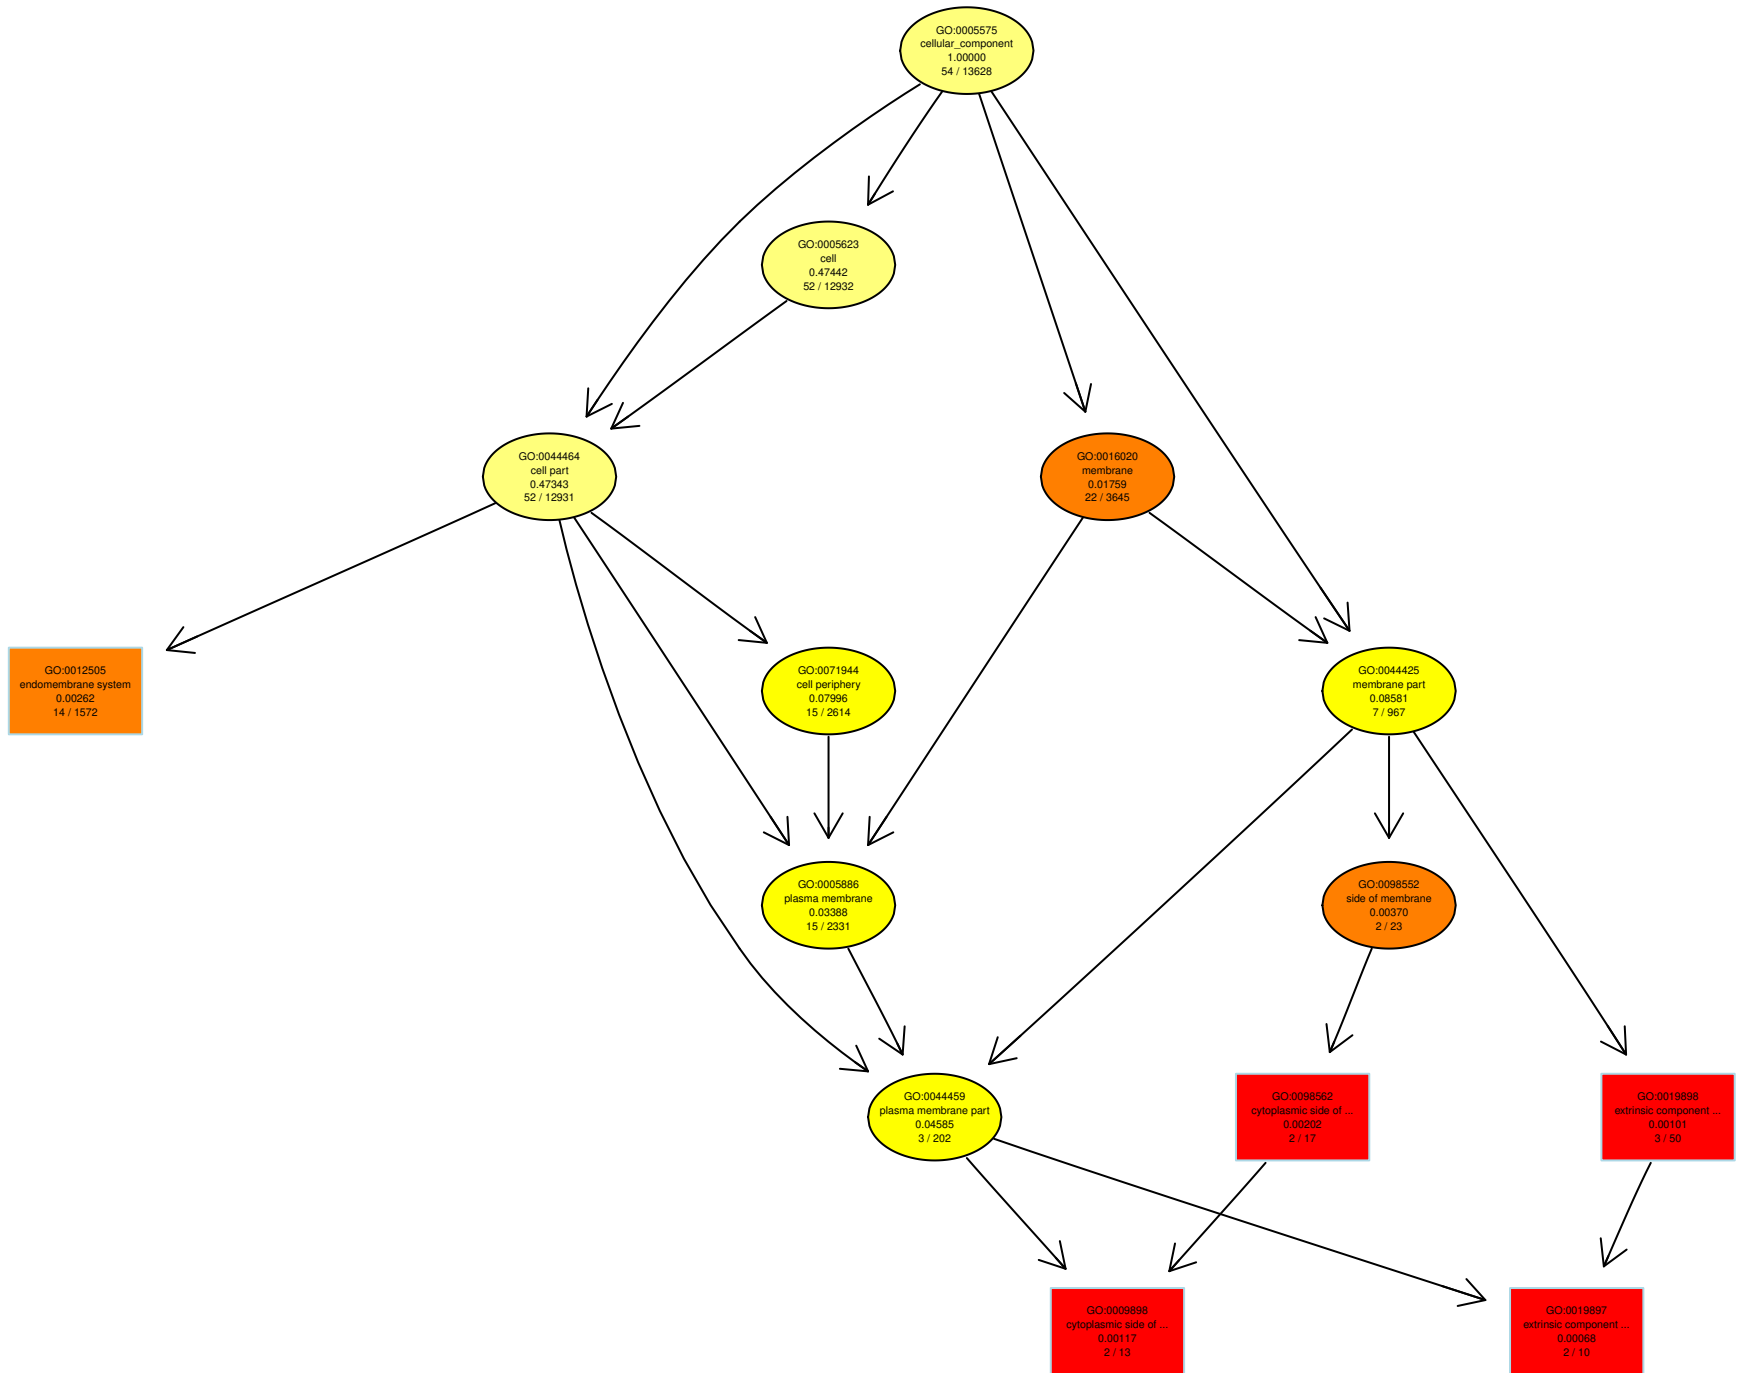

Supplement: PLD3-6-e396-s283.pdf [file PLD3-6-e396-s283.pdf]

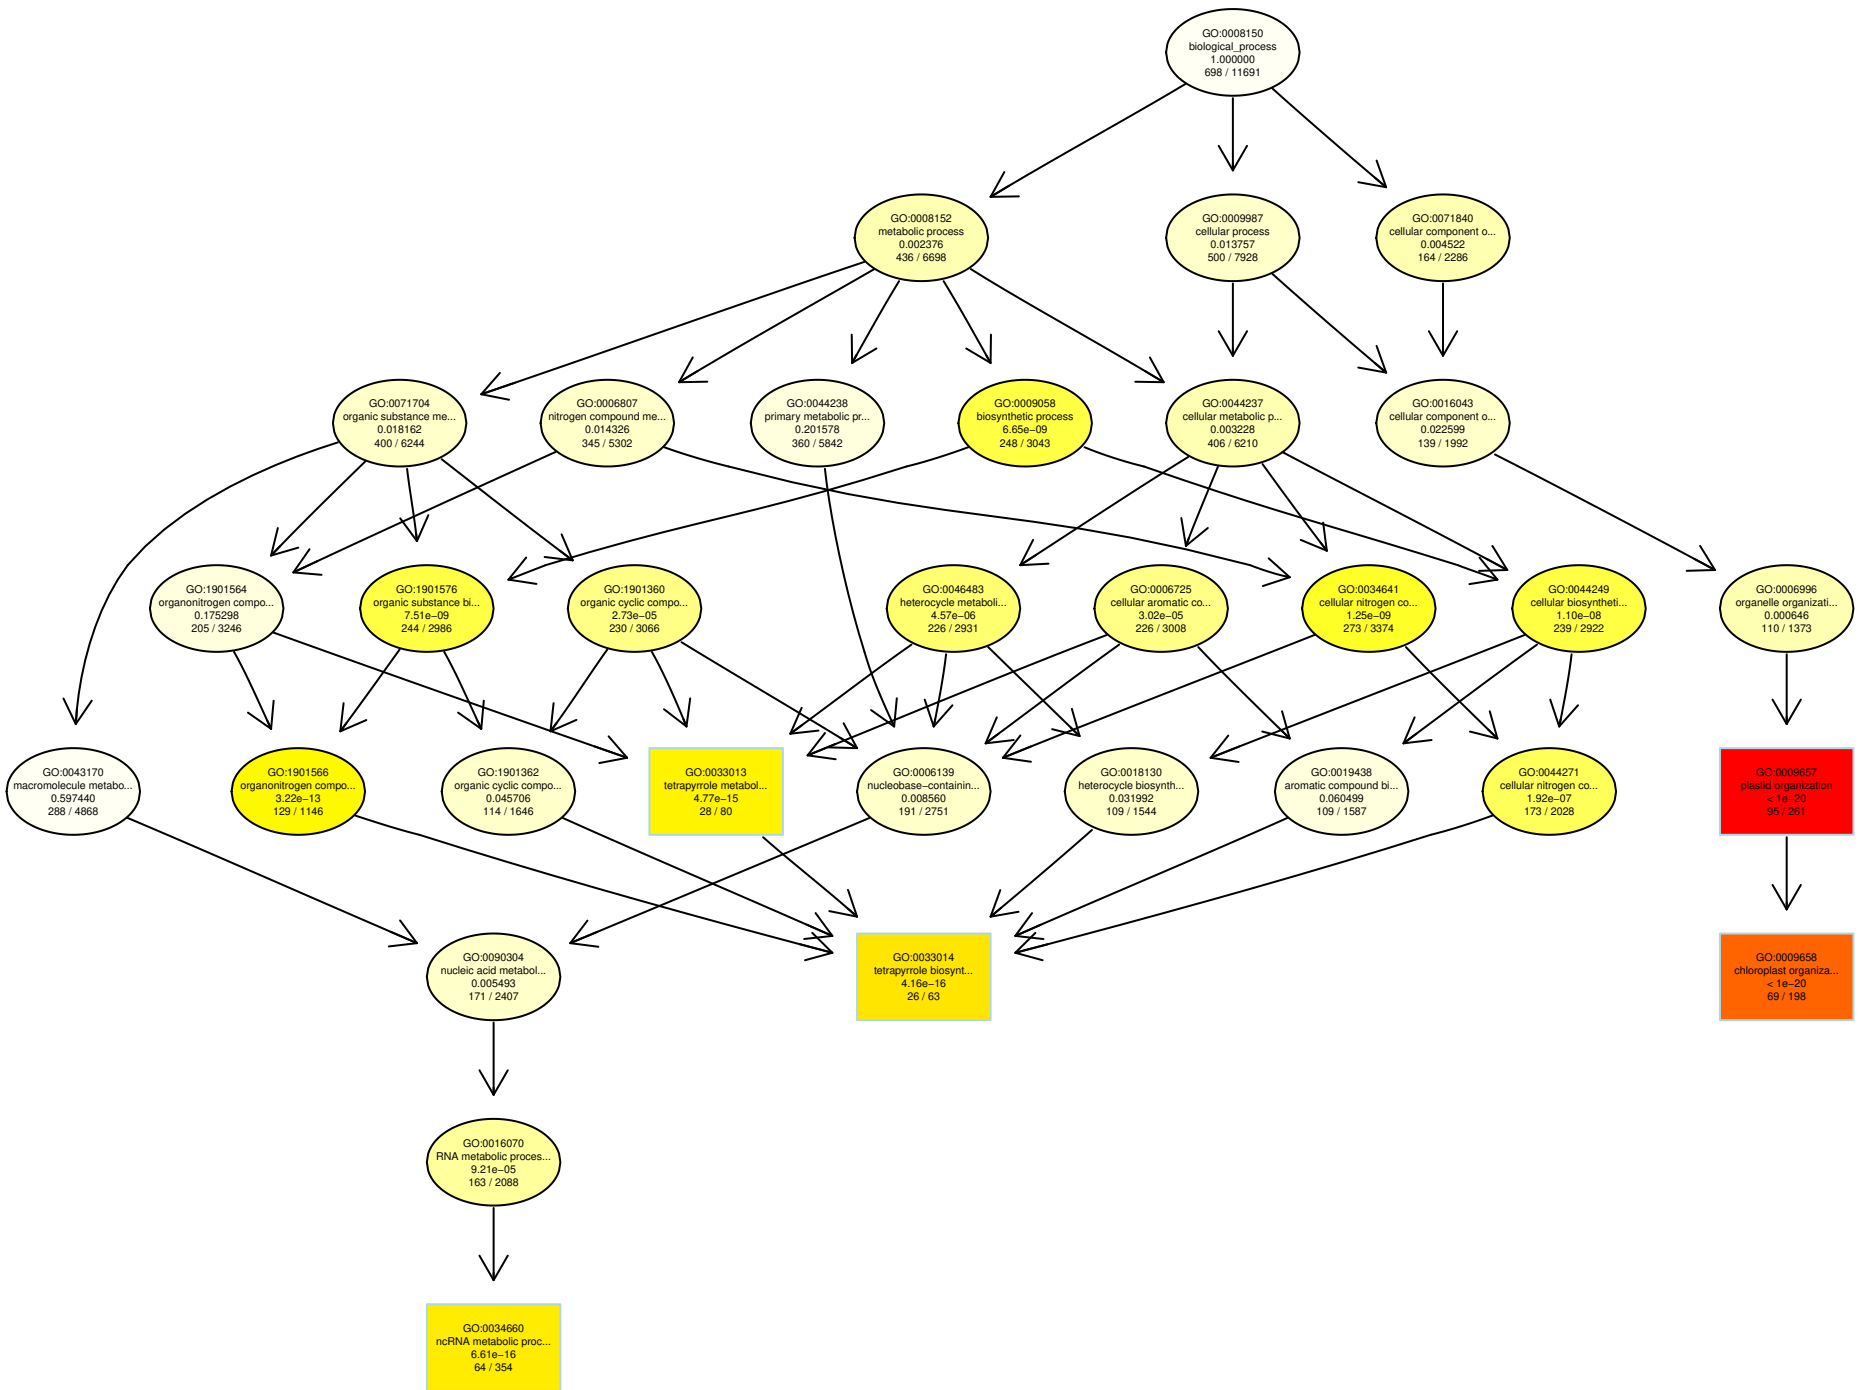

Supplement: PLD3-6-e396-s284.pdf [file PLD3-6-e396-s284.pdf]

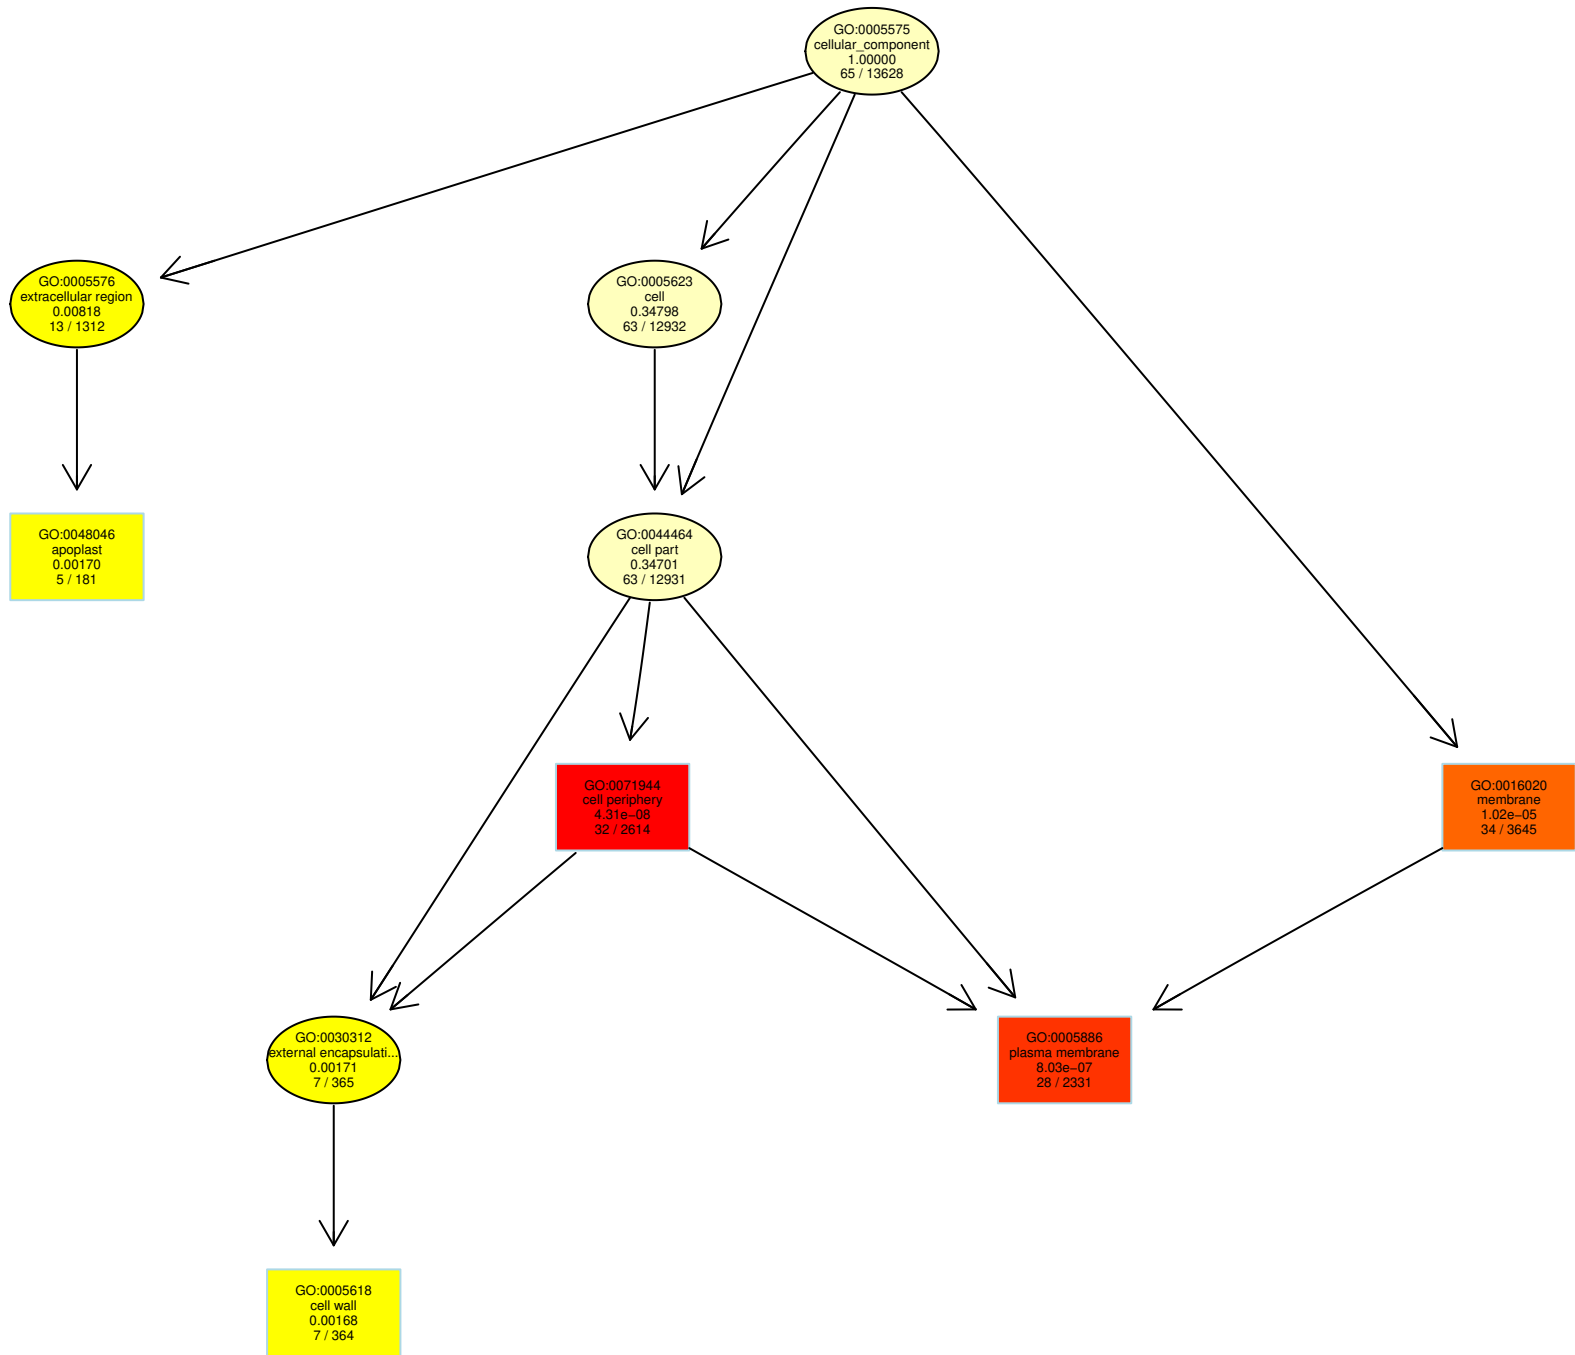

Supplement: PLD3-6-e396-s285.pdf [file PLD3-6-e396-s285.pdf]

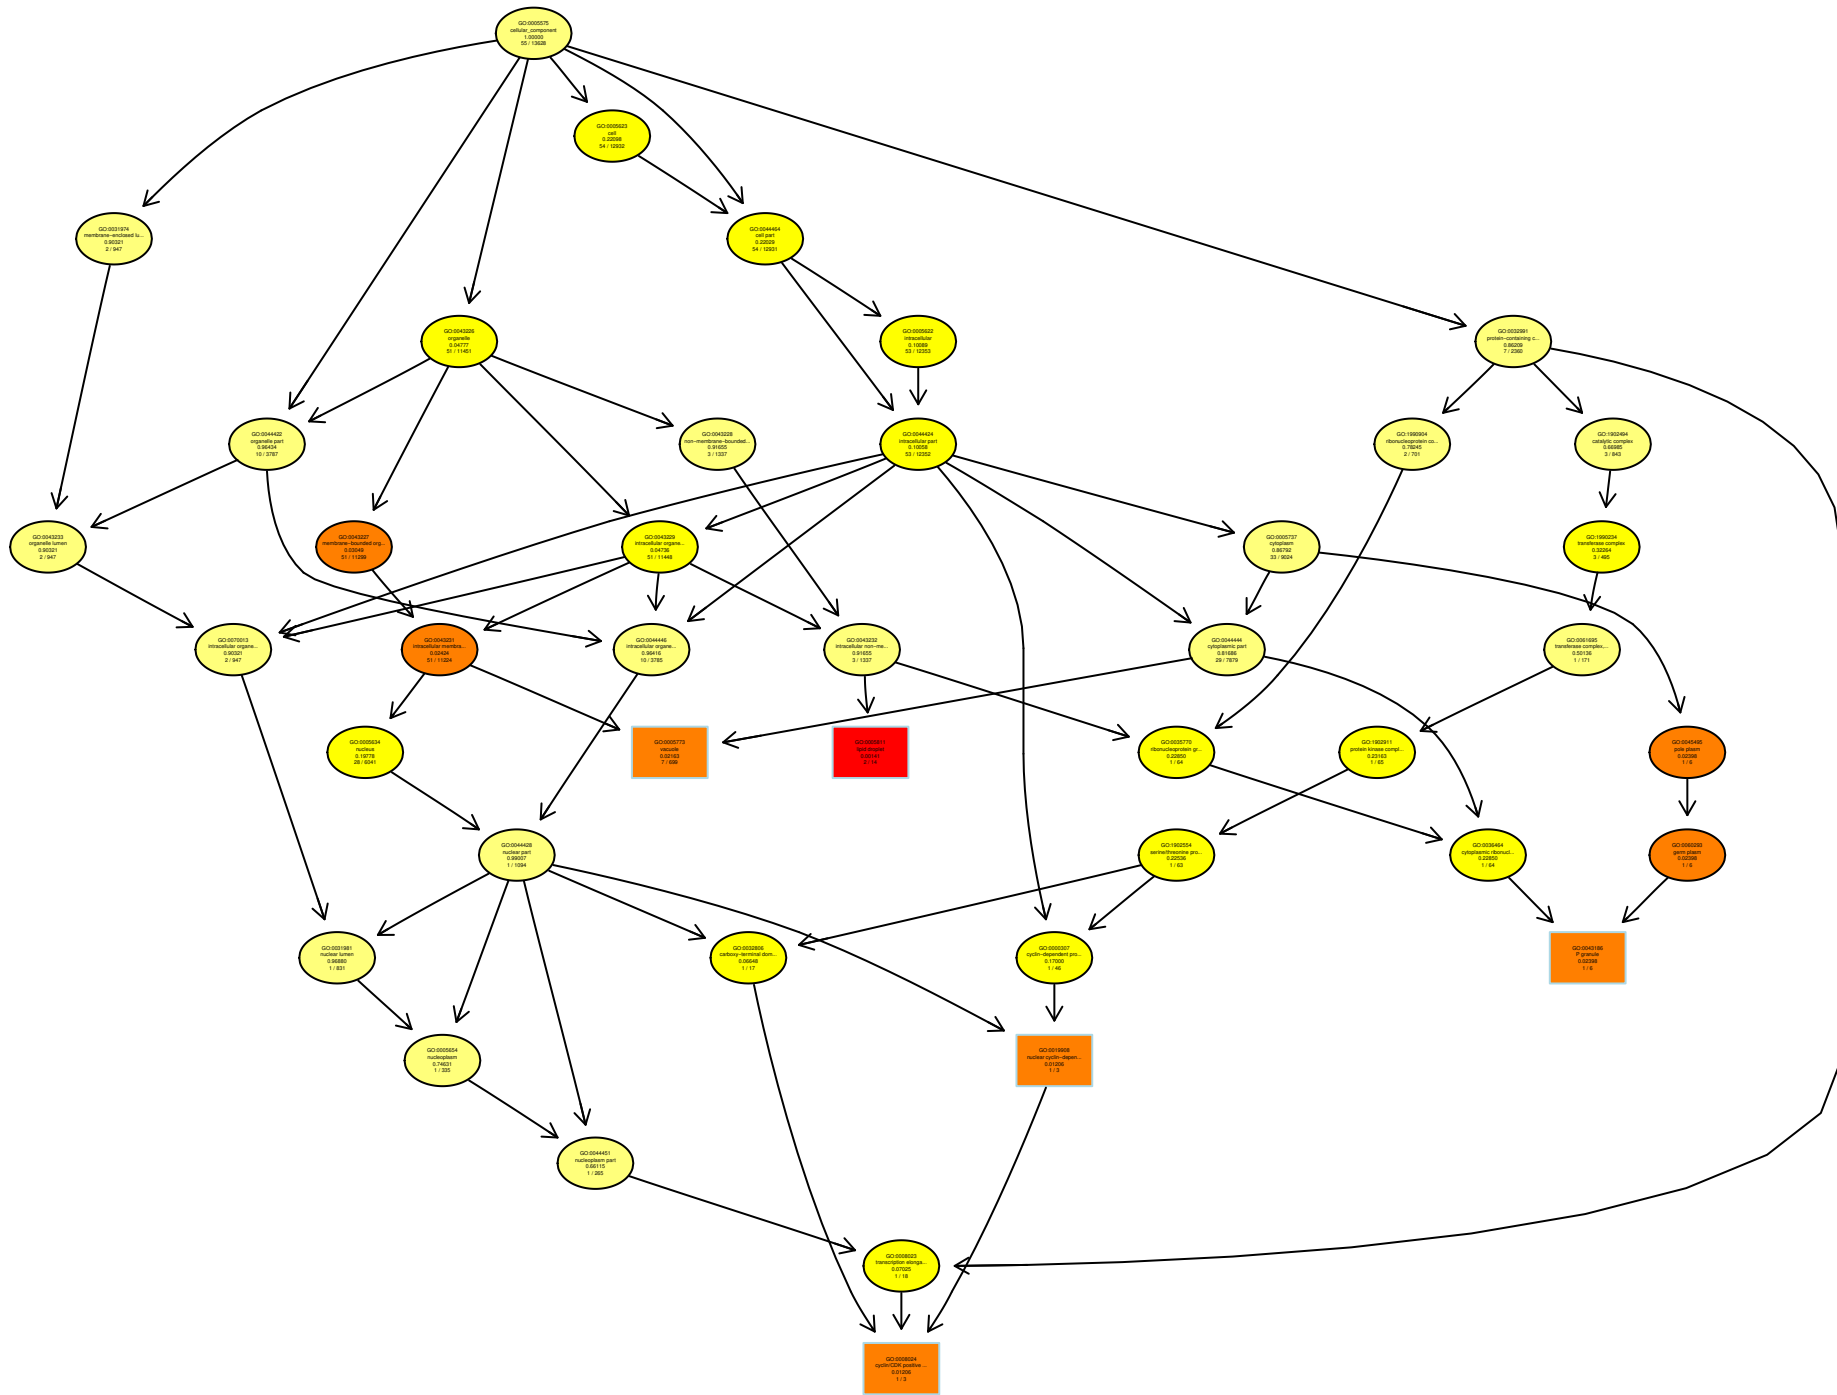

Supplement: PLD3-6-e396-s287.pdf [file PLD3-6-e396-s287.pdf]

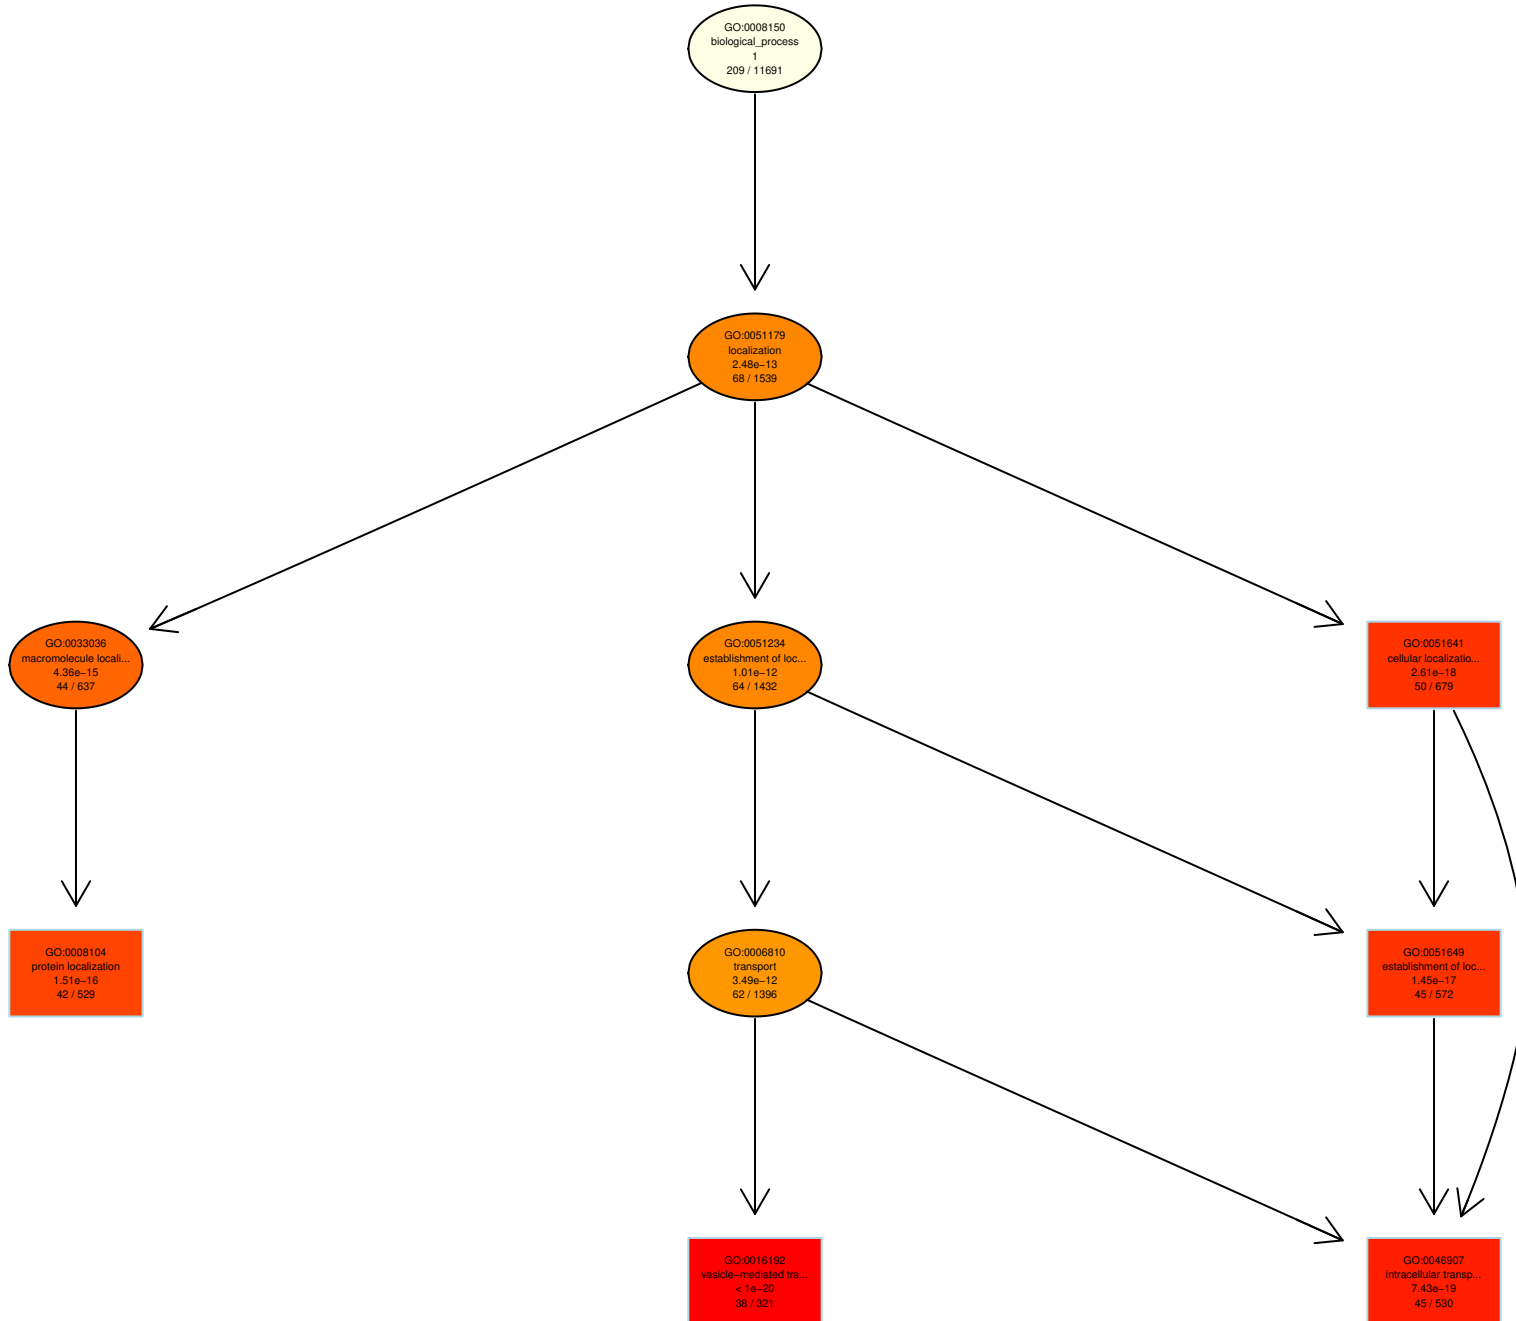

Supplement: PLD3-6-e396-s289.pdf [file PLD3-6-e396-s289.pdf]

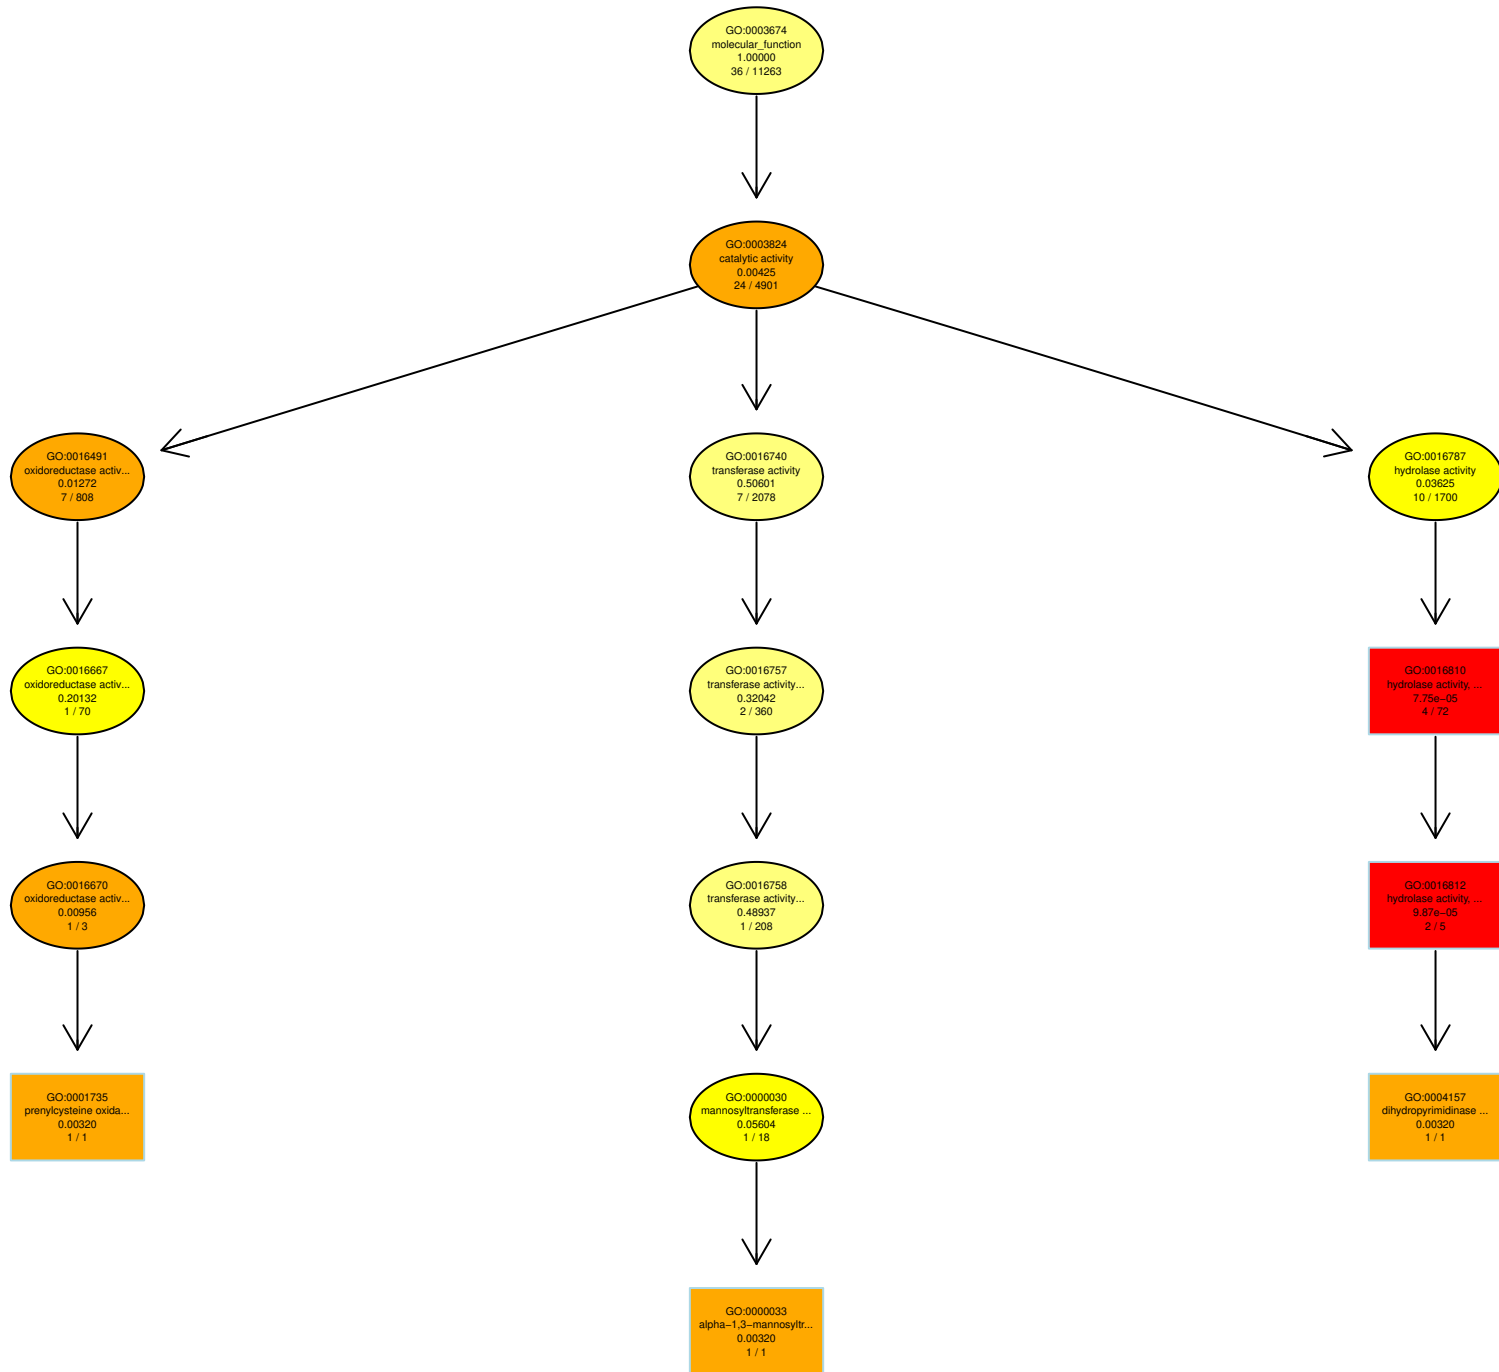

Supplement: PLD3-6-e396-s294.pdf [file PLD3-6-e396-s294.pdf]

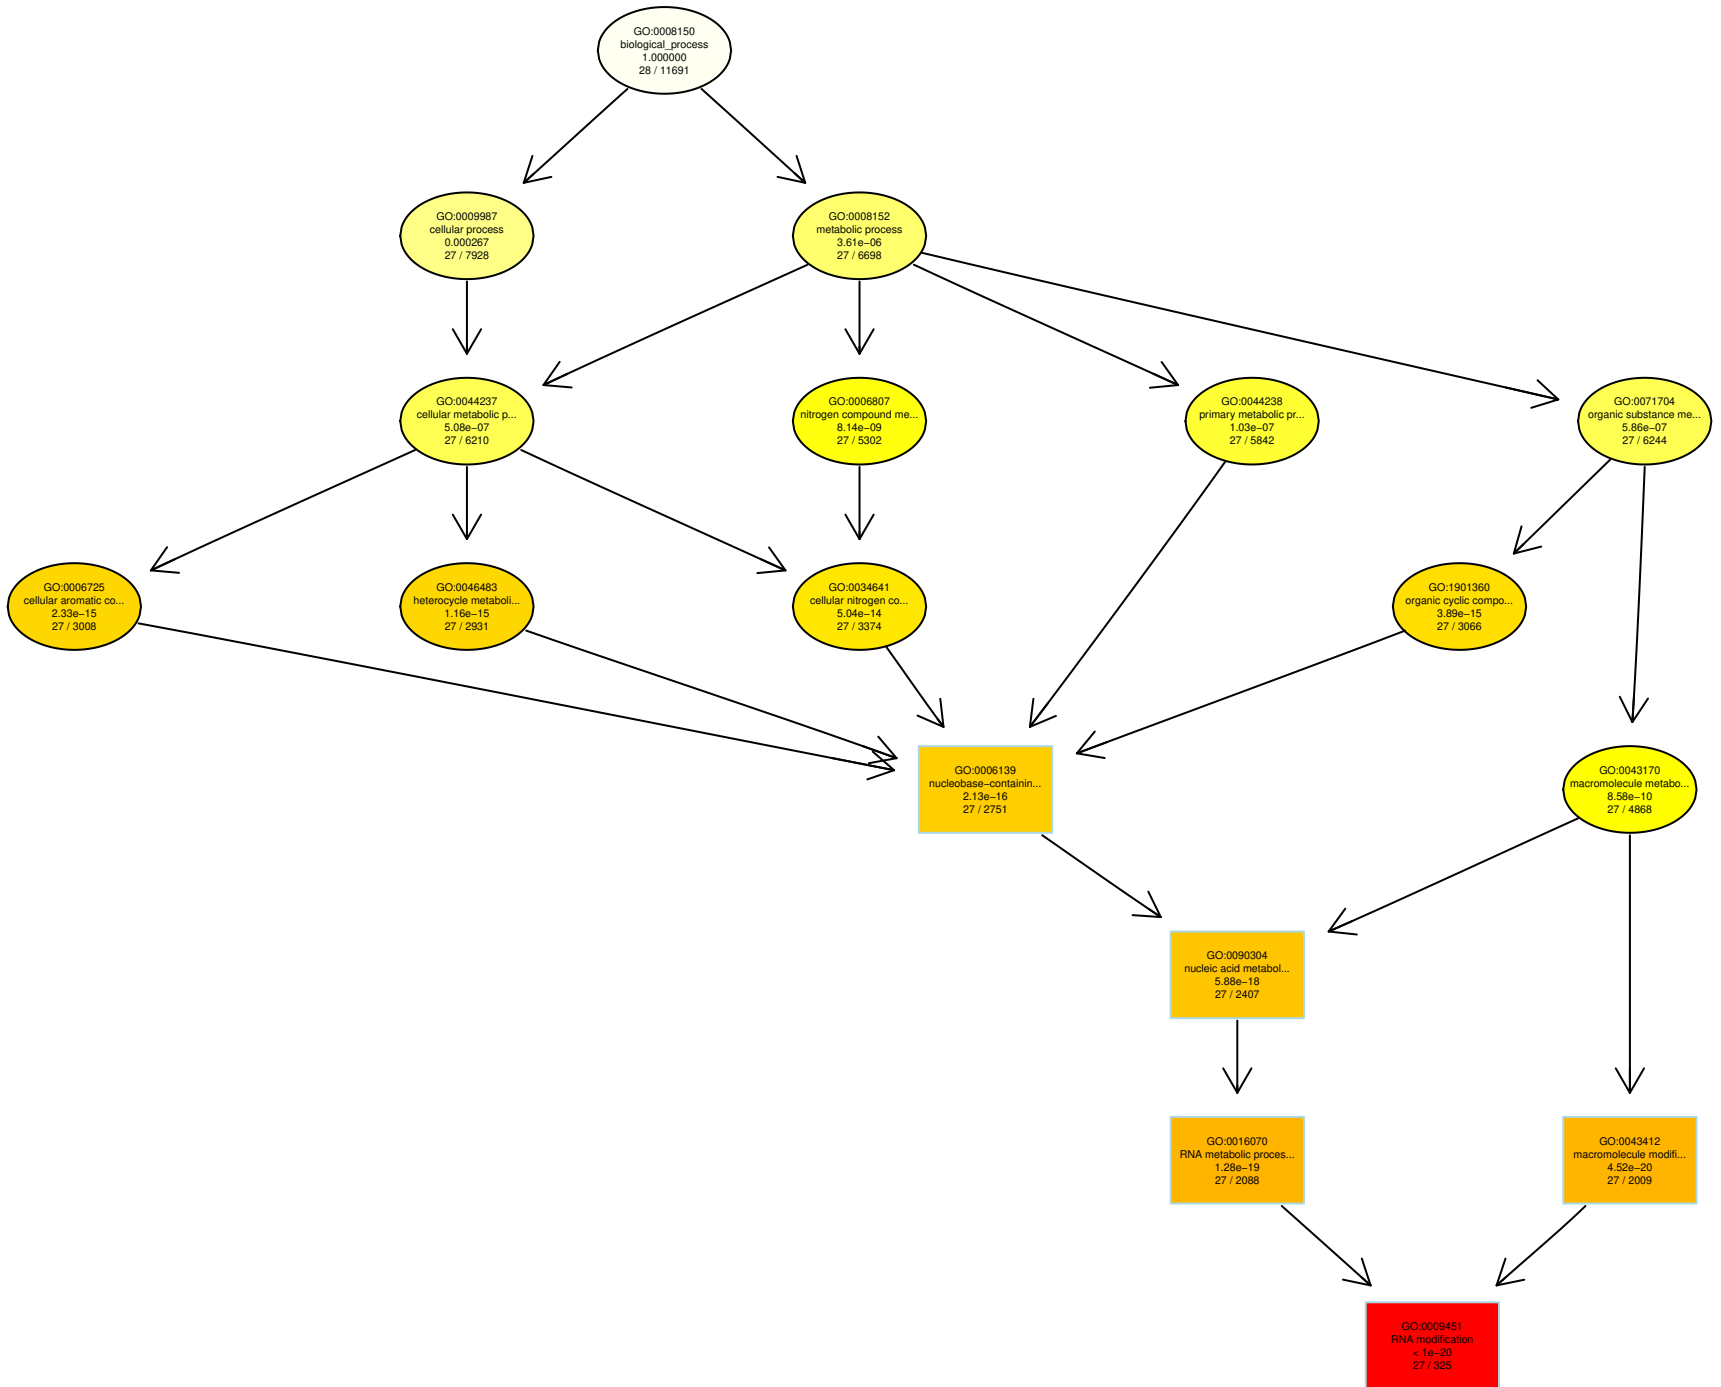

Supplement: PLD3-6-e396-s297.pdf [file PLD3-6-e396-s297.pdf]

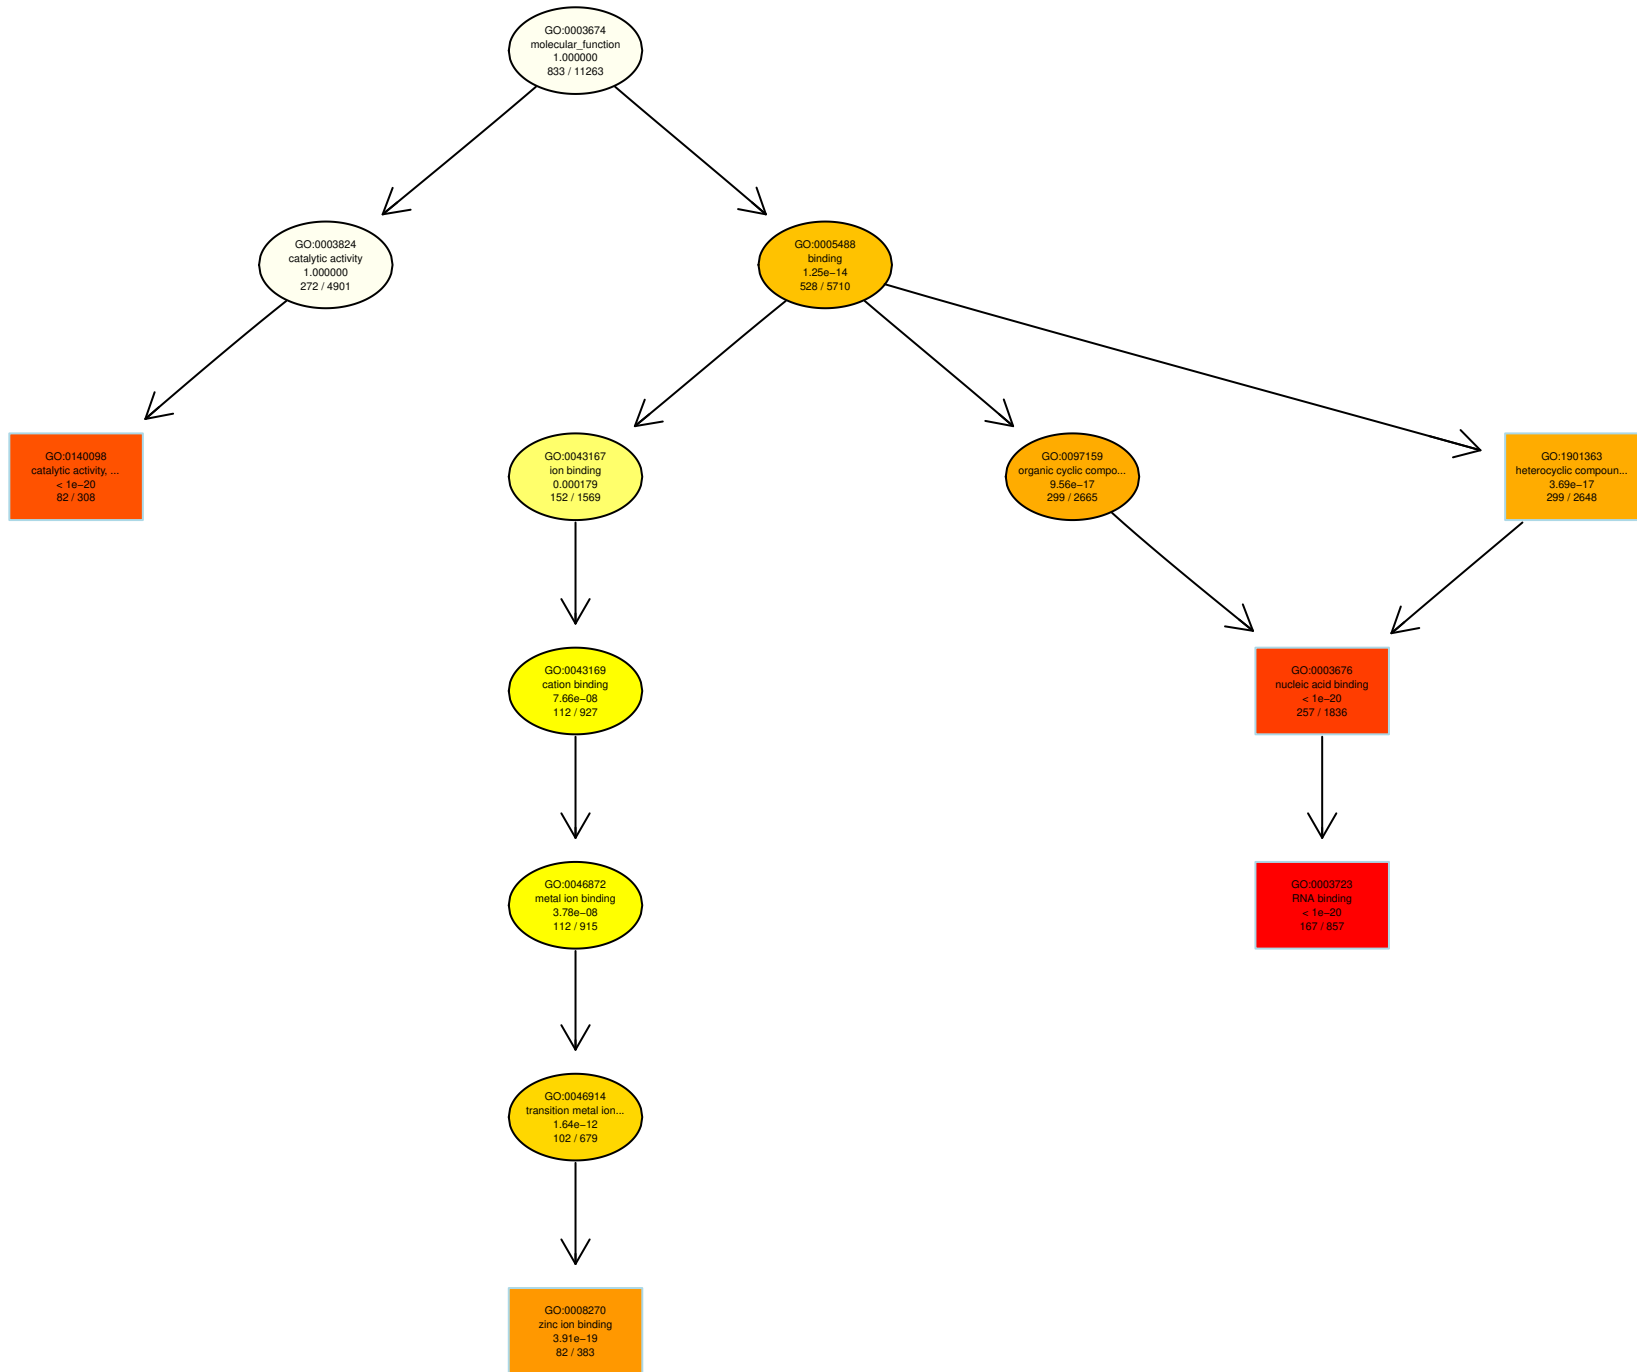

Supplement: PLD3-6-e396-s299.pdf [file PLD3-6-e396-s299.pdf]

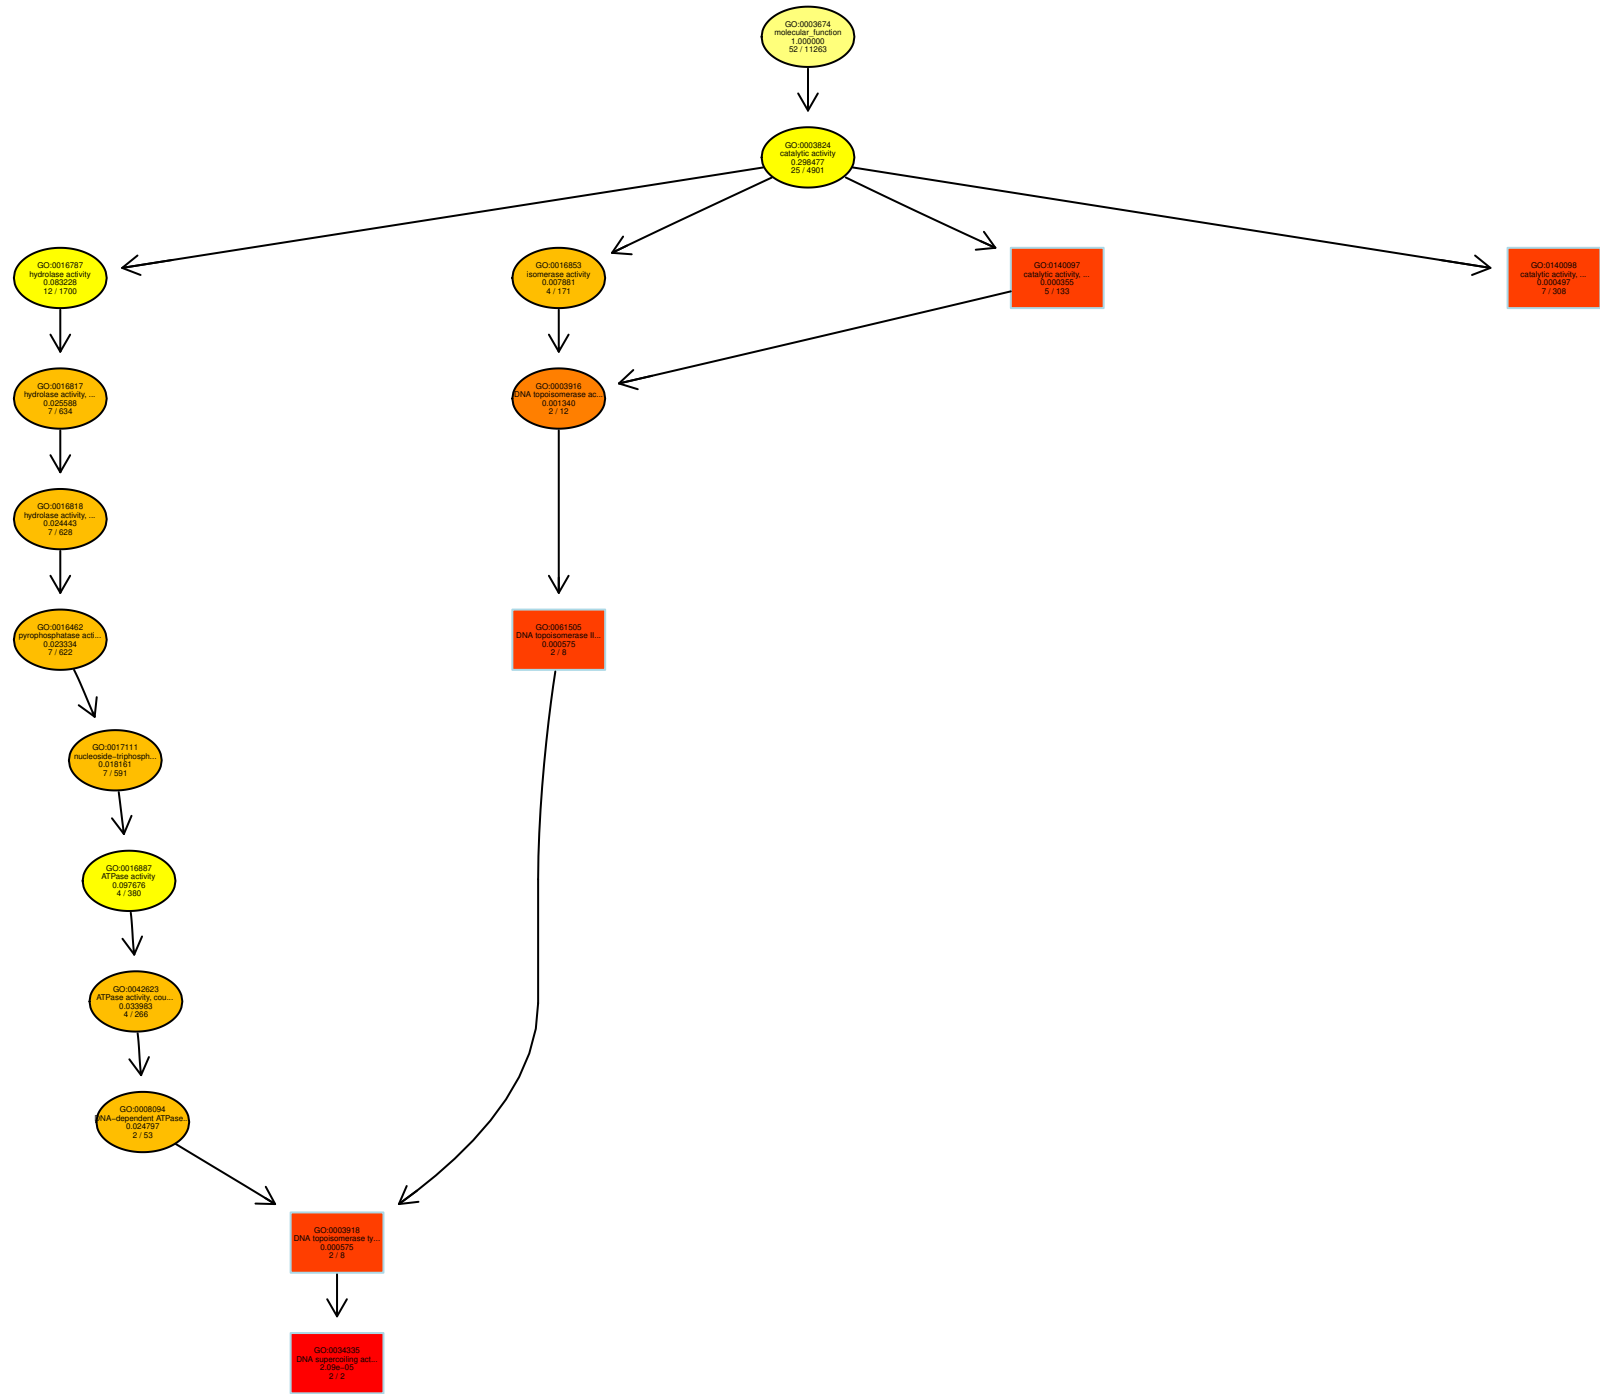

Supplement: PLD3-6-e396-s301.pdf [file PLD3-6-e396-s301.pdf]

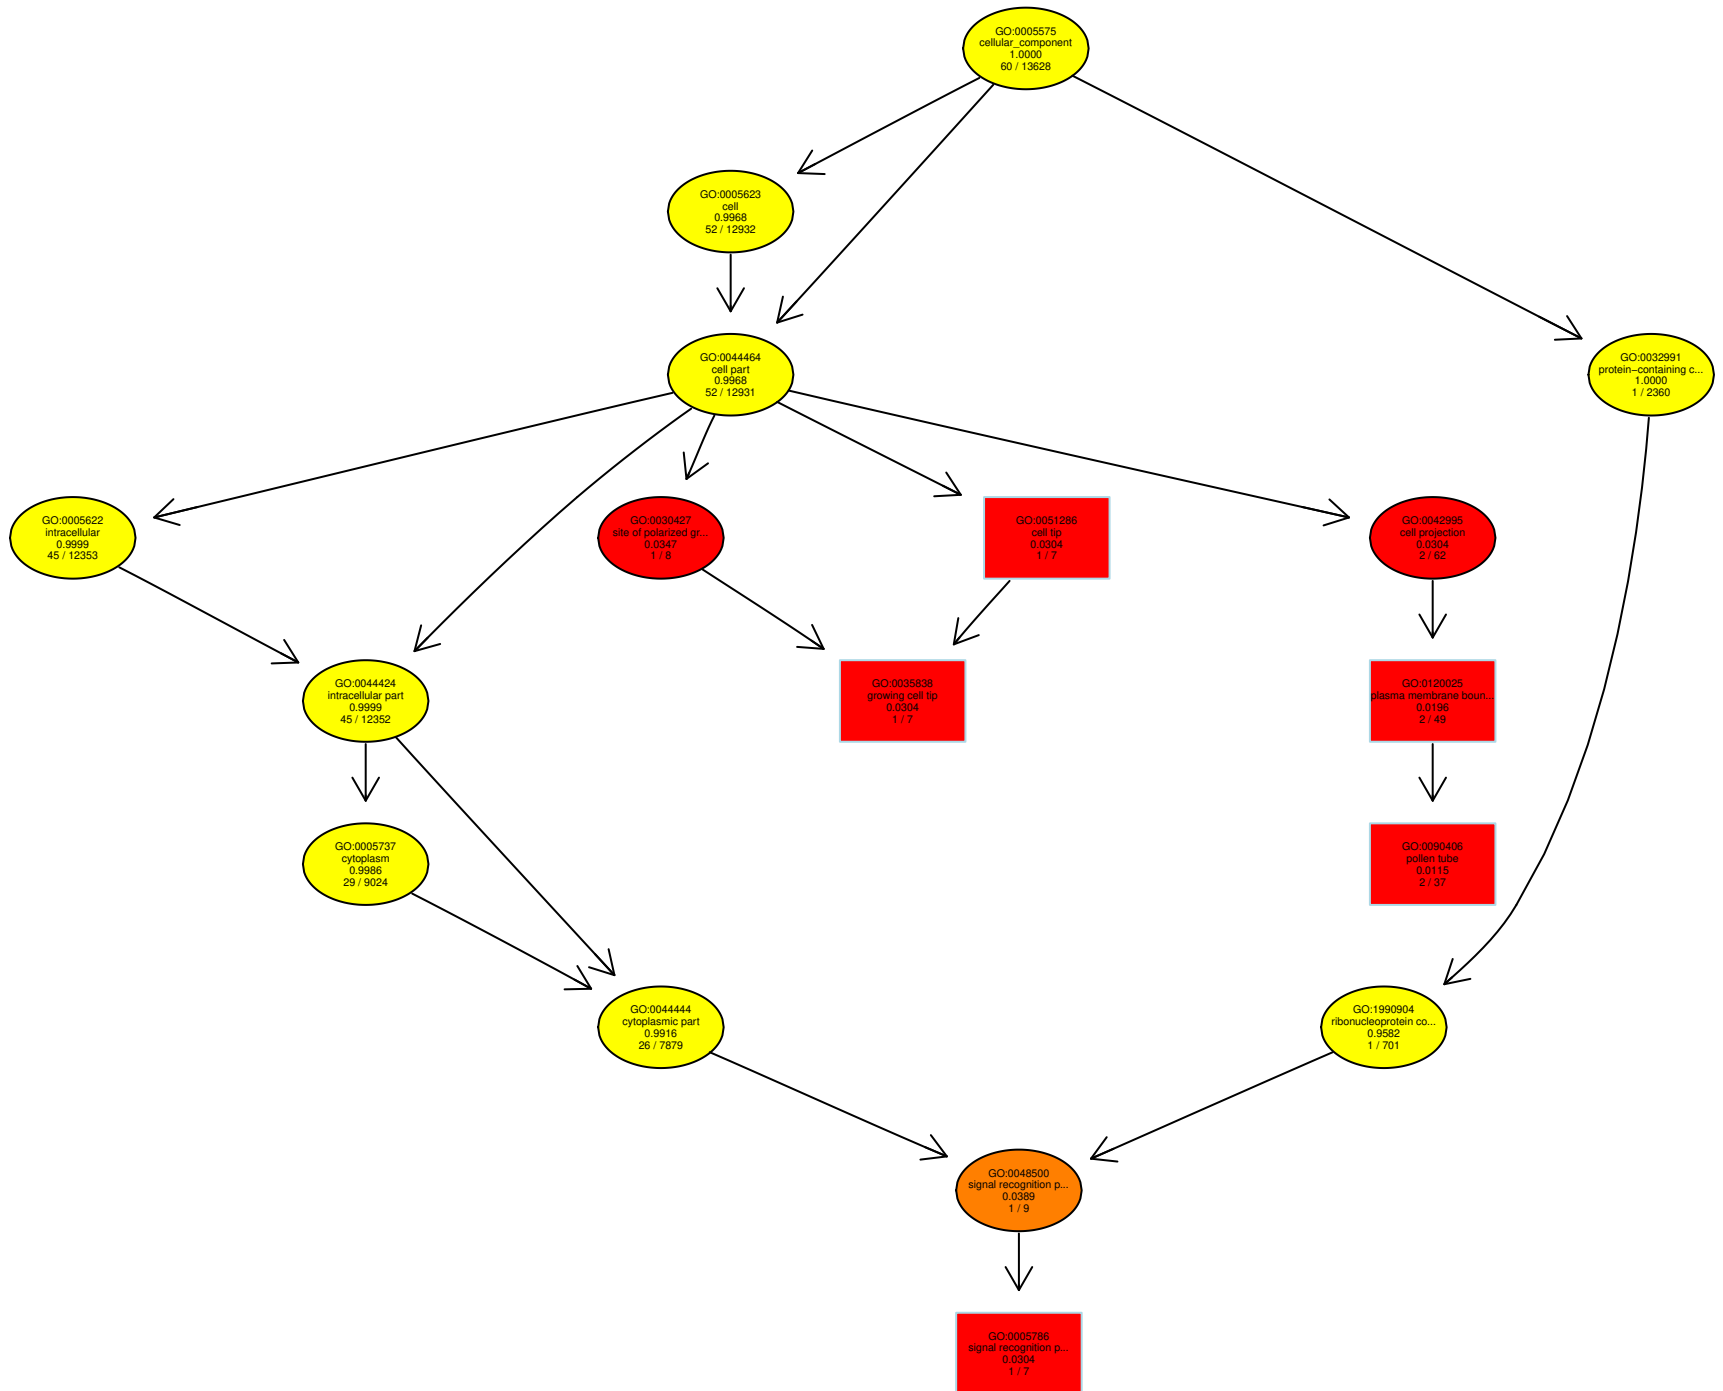

Supplement: PLD3-6-e396-s305.pdf [file PLD3-6-e396-s305.pdf]

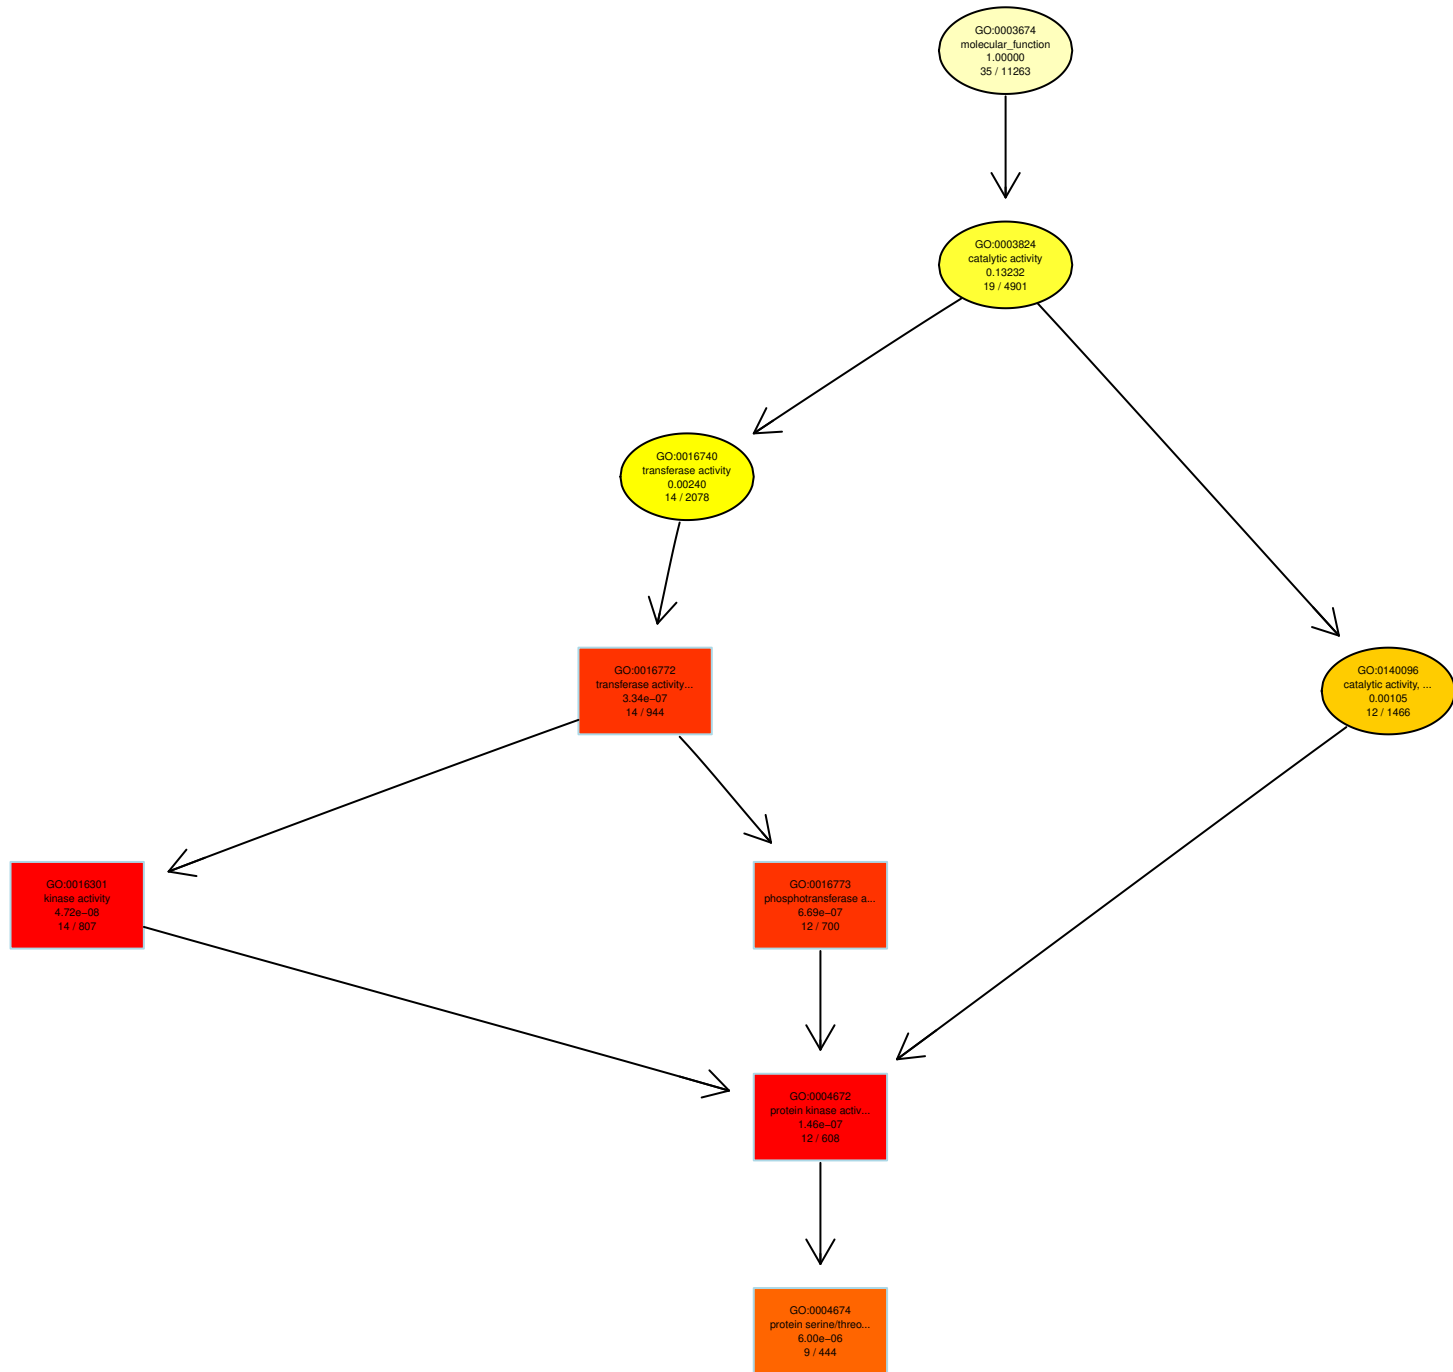

Supplement: PLD3-6-e396-s308.pdf [file PLD3-6-e396-s308.pdf]

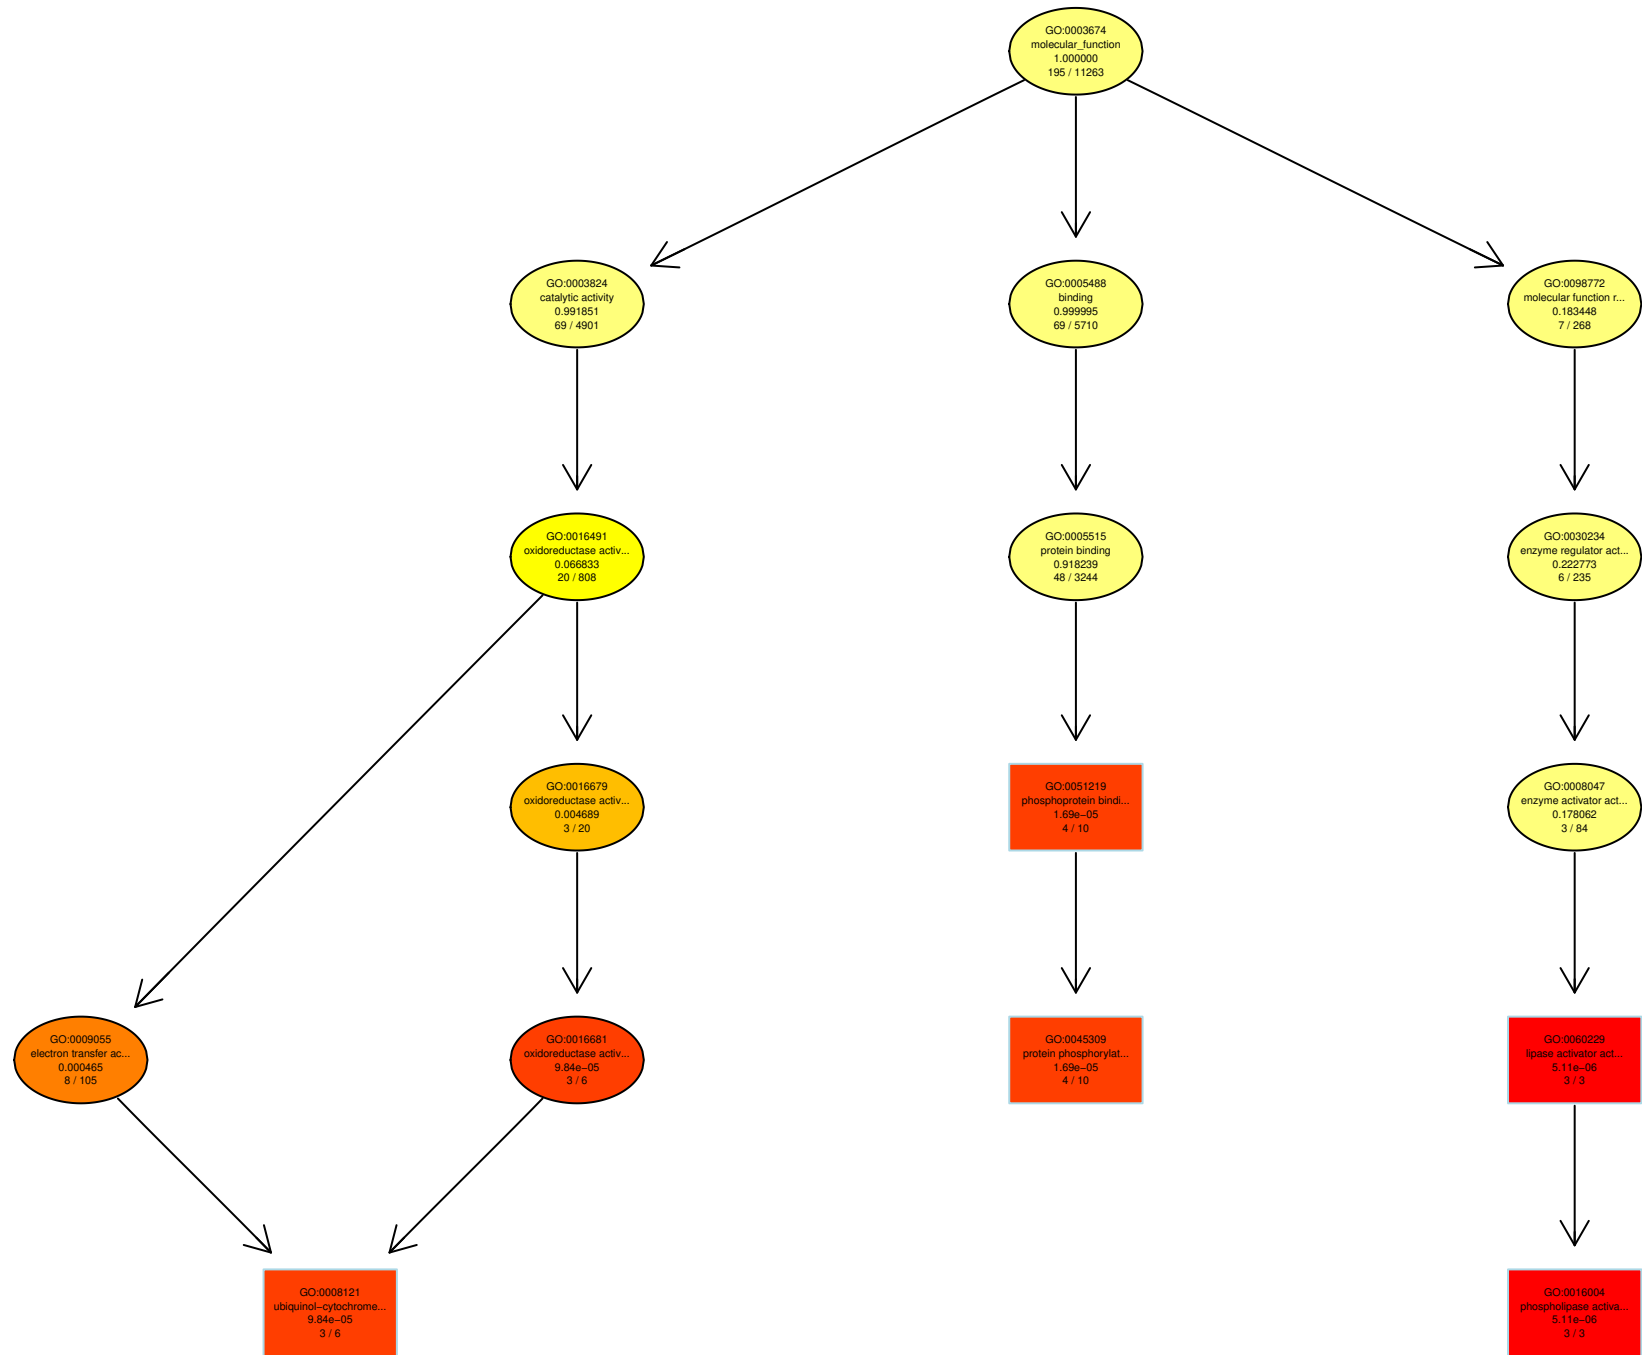

Supplement: PLD3-6-e396-s310.pdf [file PLD3-6-e396-s310.pdf]

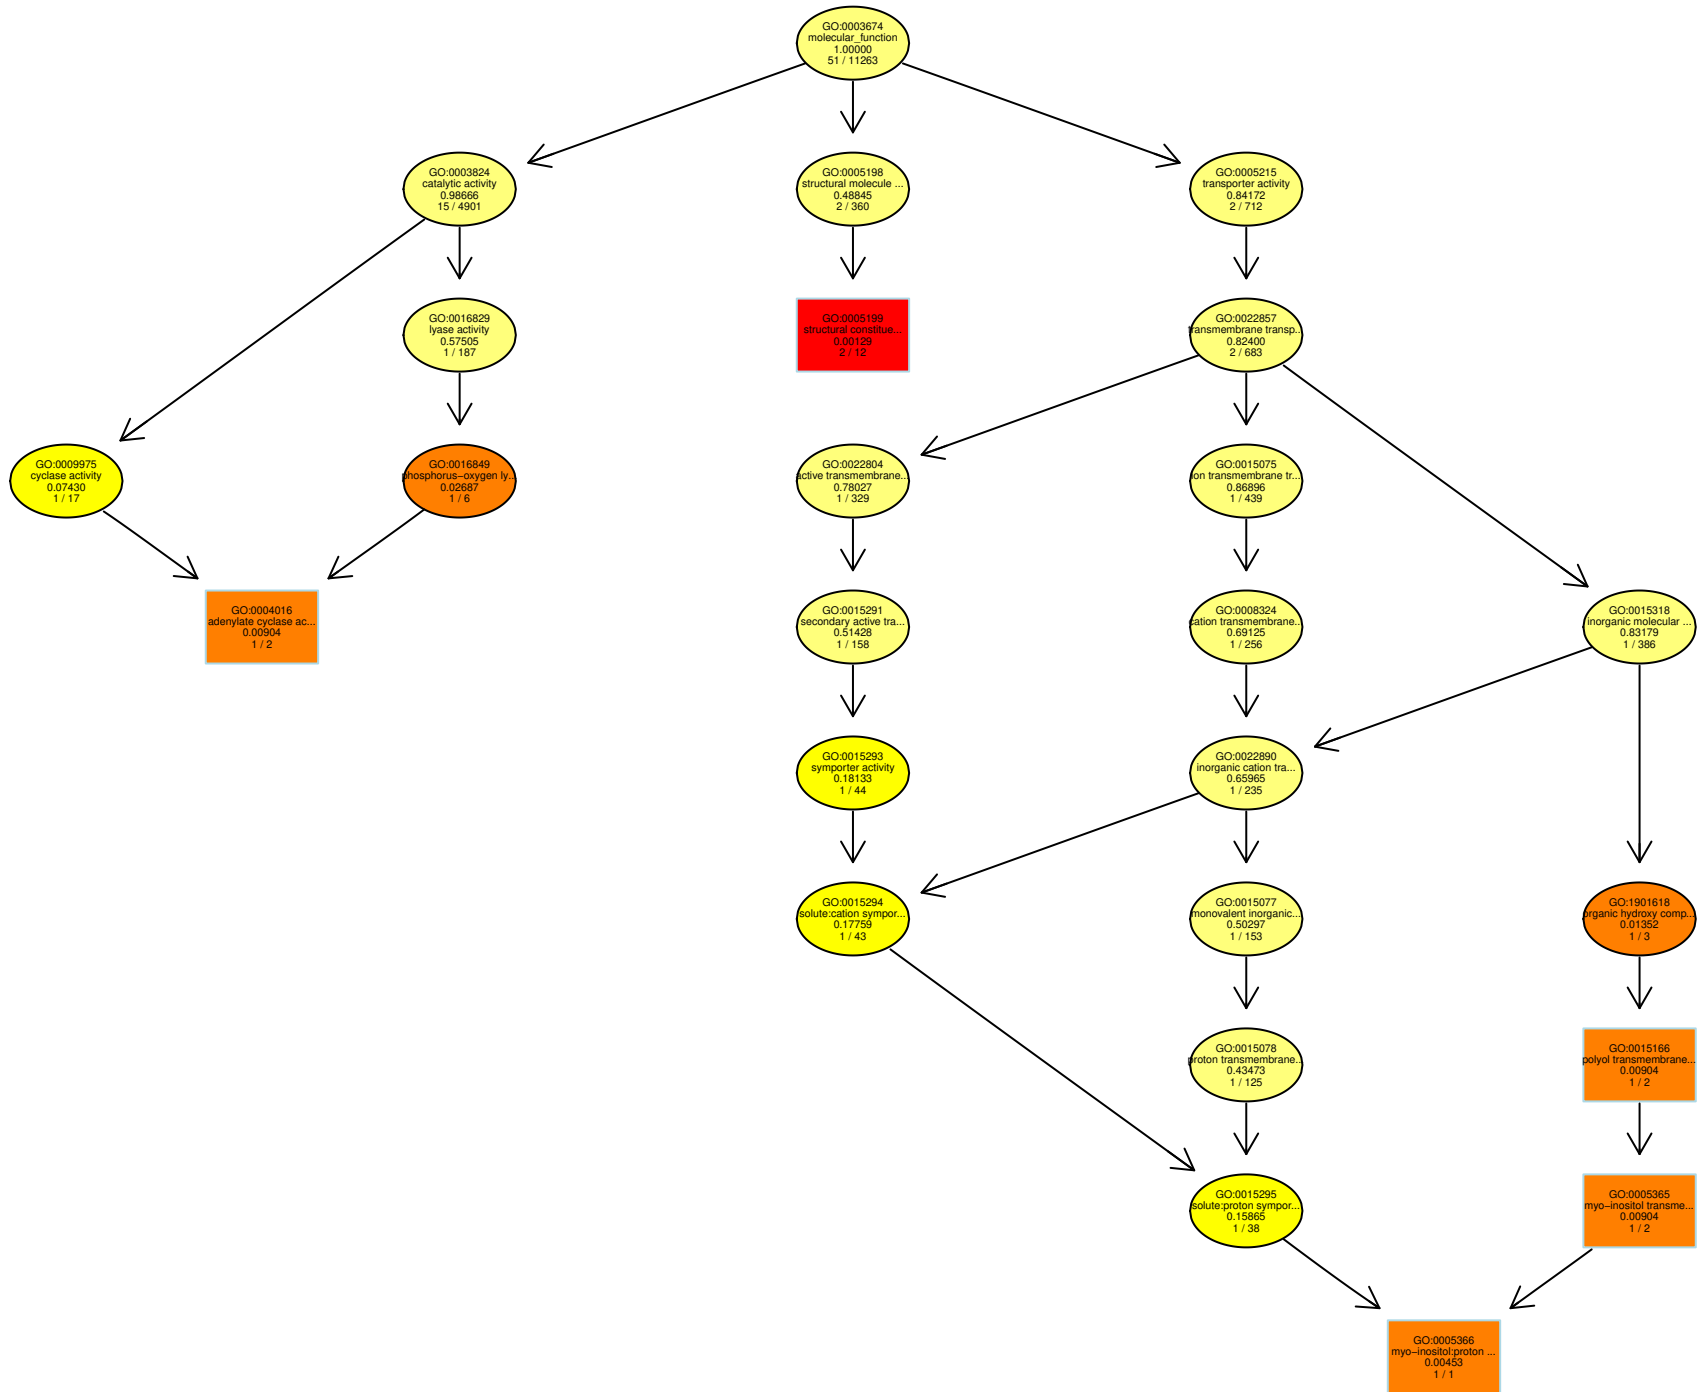

Supplement: PLD3-6-e396-s312.pdf [file PLD3-6-e396-s312.pdf]

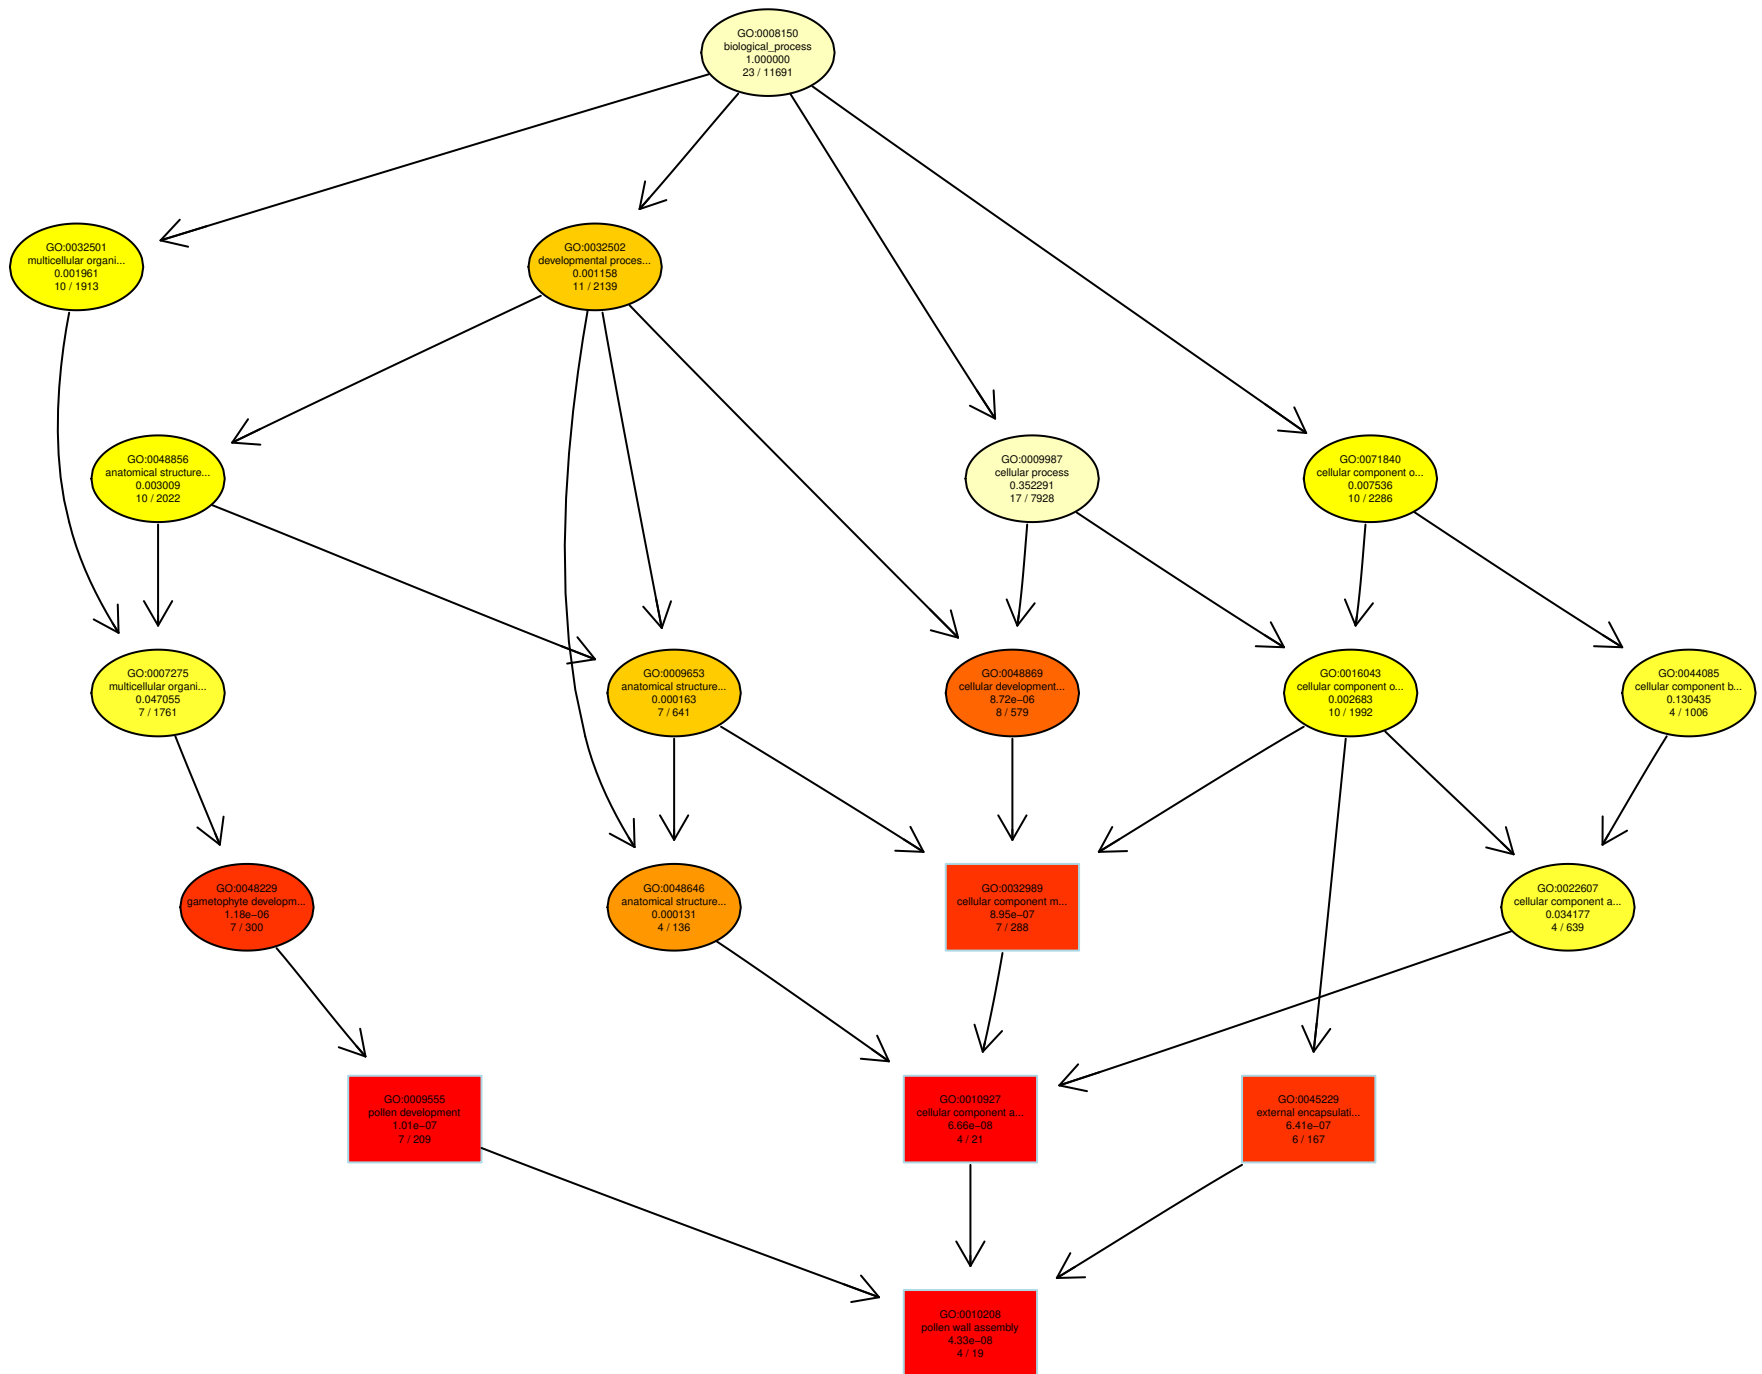

Supplement: PLD3-6-e396-s313.pdf [file PLD3-6-e396-s313.pdf]

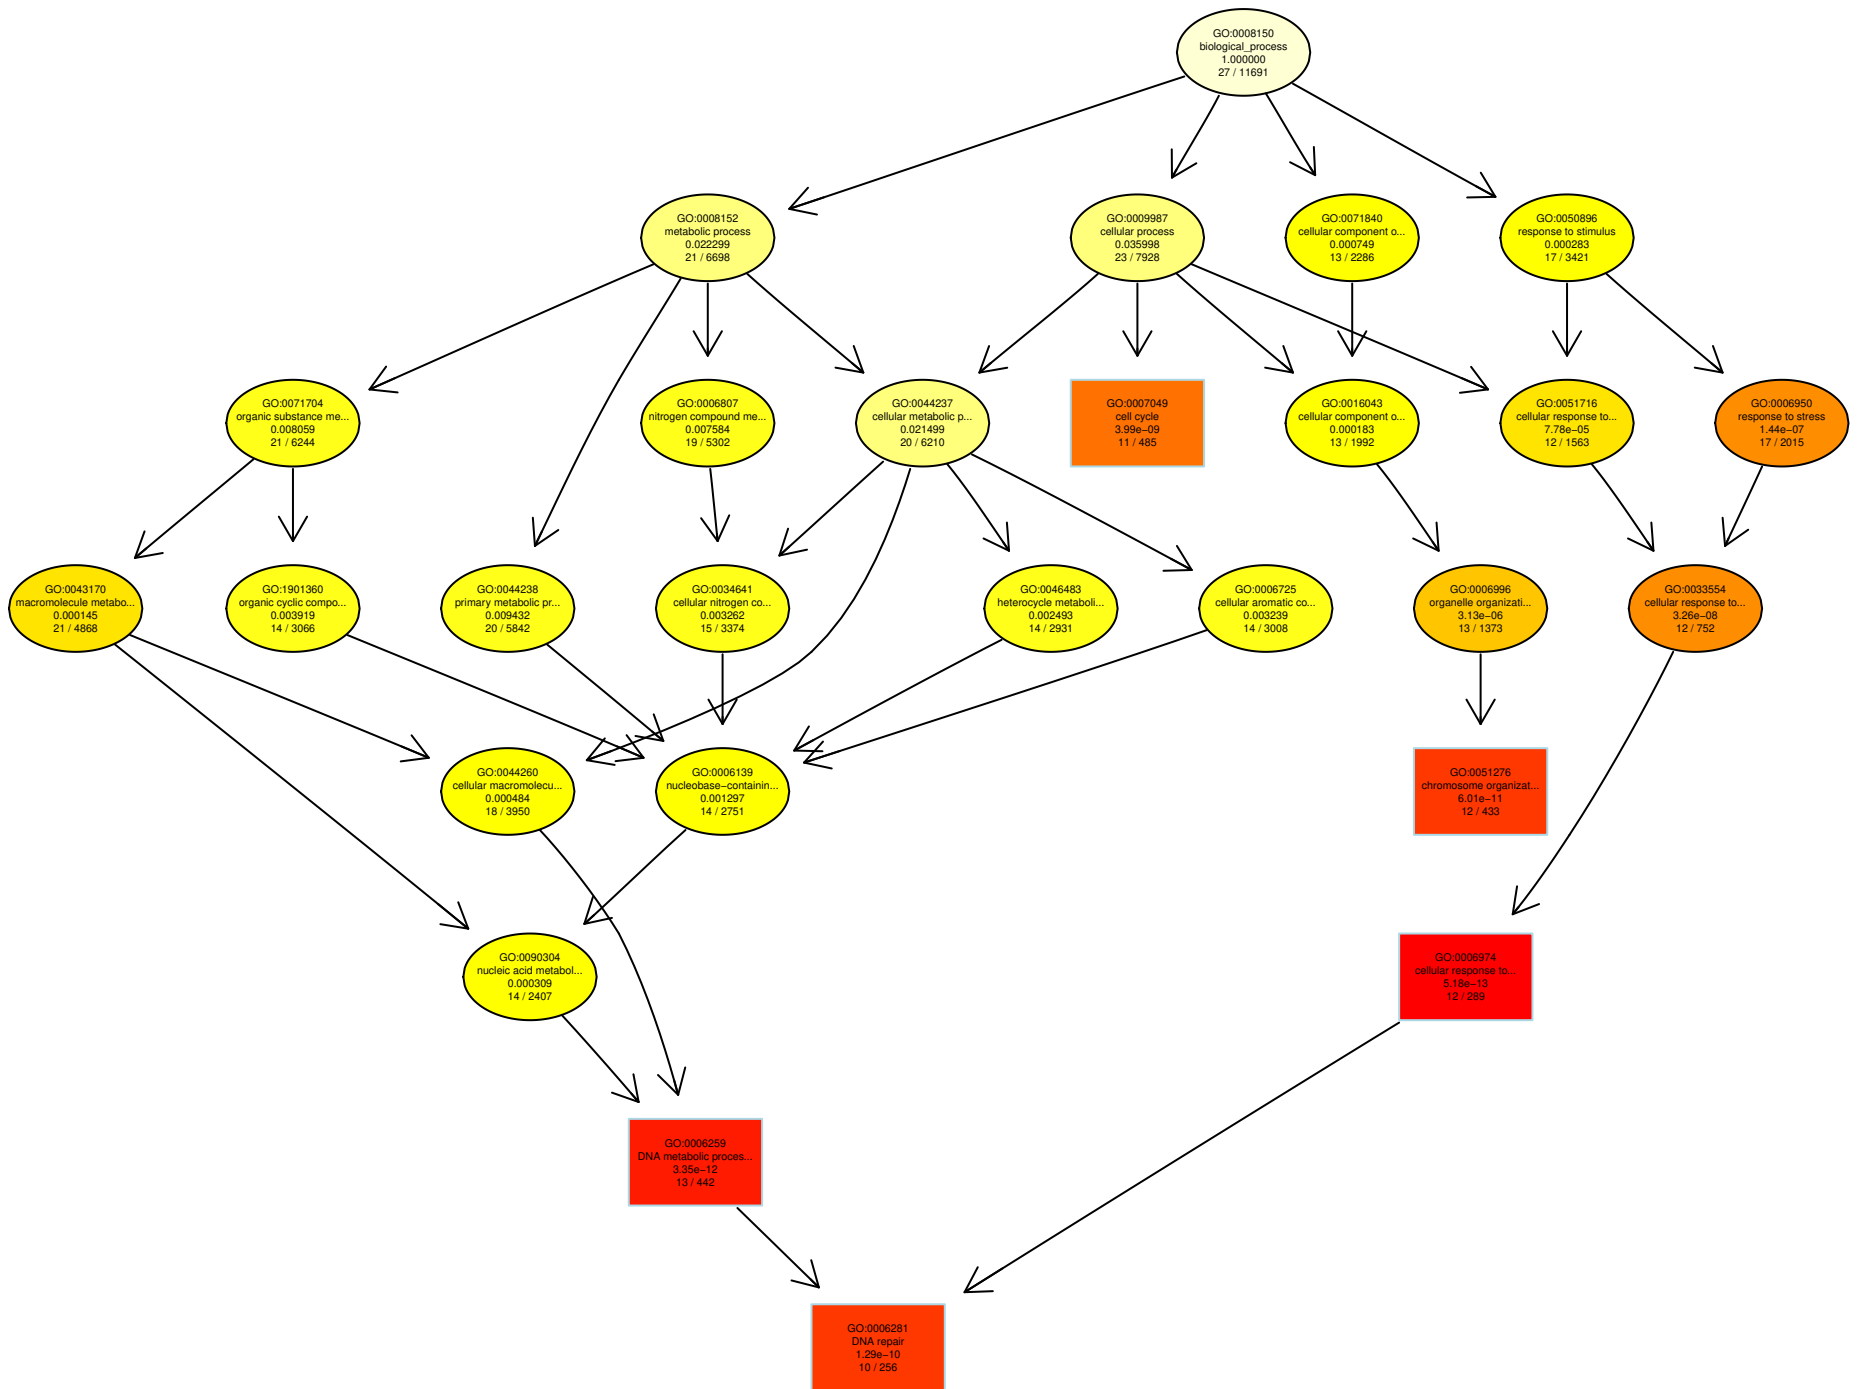

Supplement: PLD3-6-e396-s316.pdf [file PLD3-6-e396-s316.pdf]

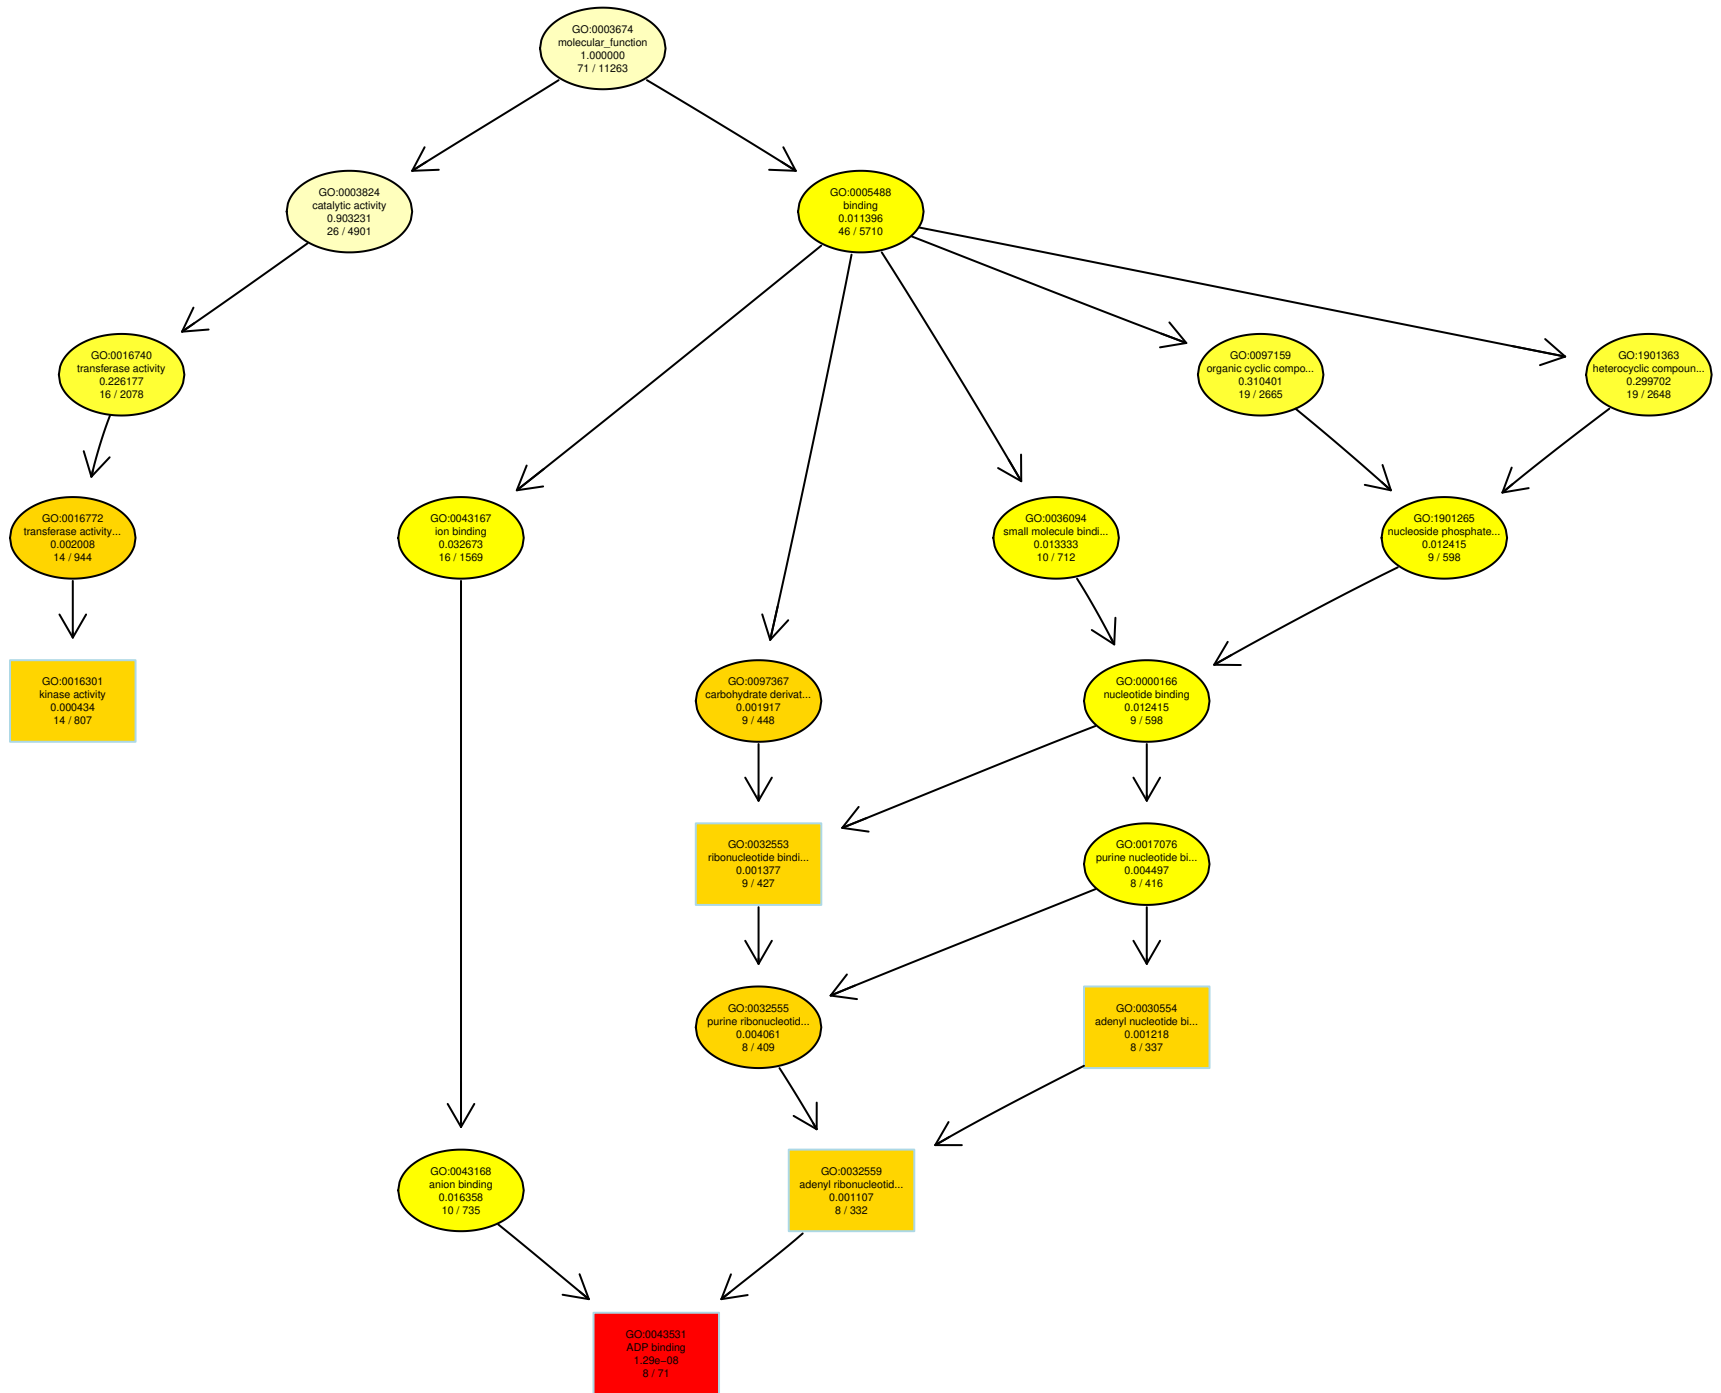

Supplement: PLD3-6-e396-s320.pdf [file PLD3-6-e396-s320.pdf]

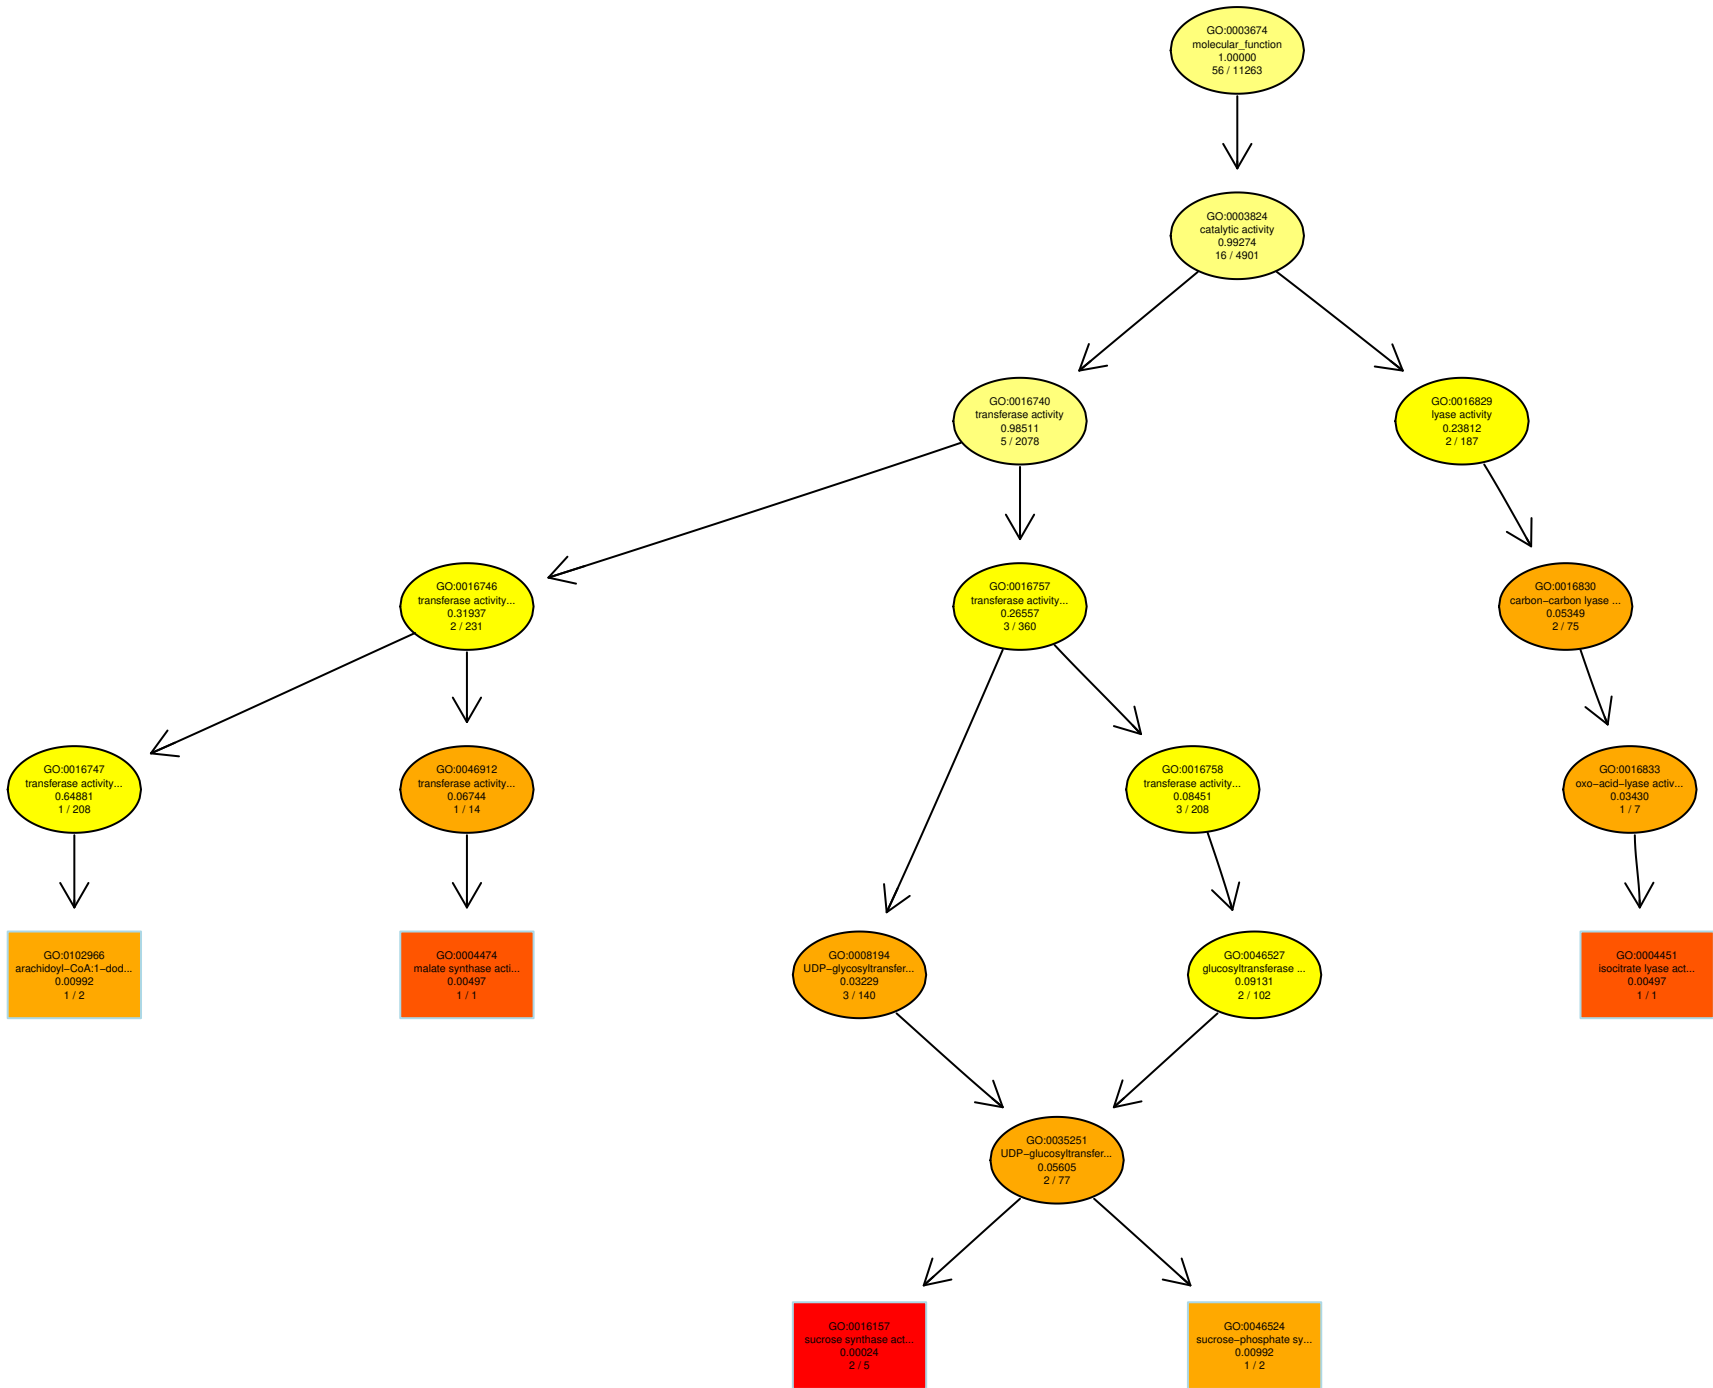

Supplement: PLD3-6-e396-s321.pdf [file PLD3-6-e396-s321.pdf]

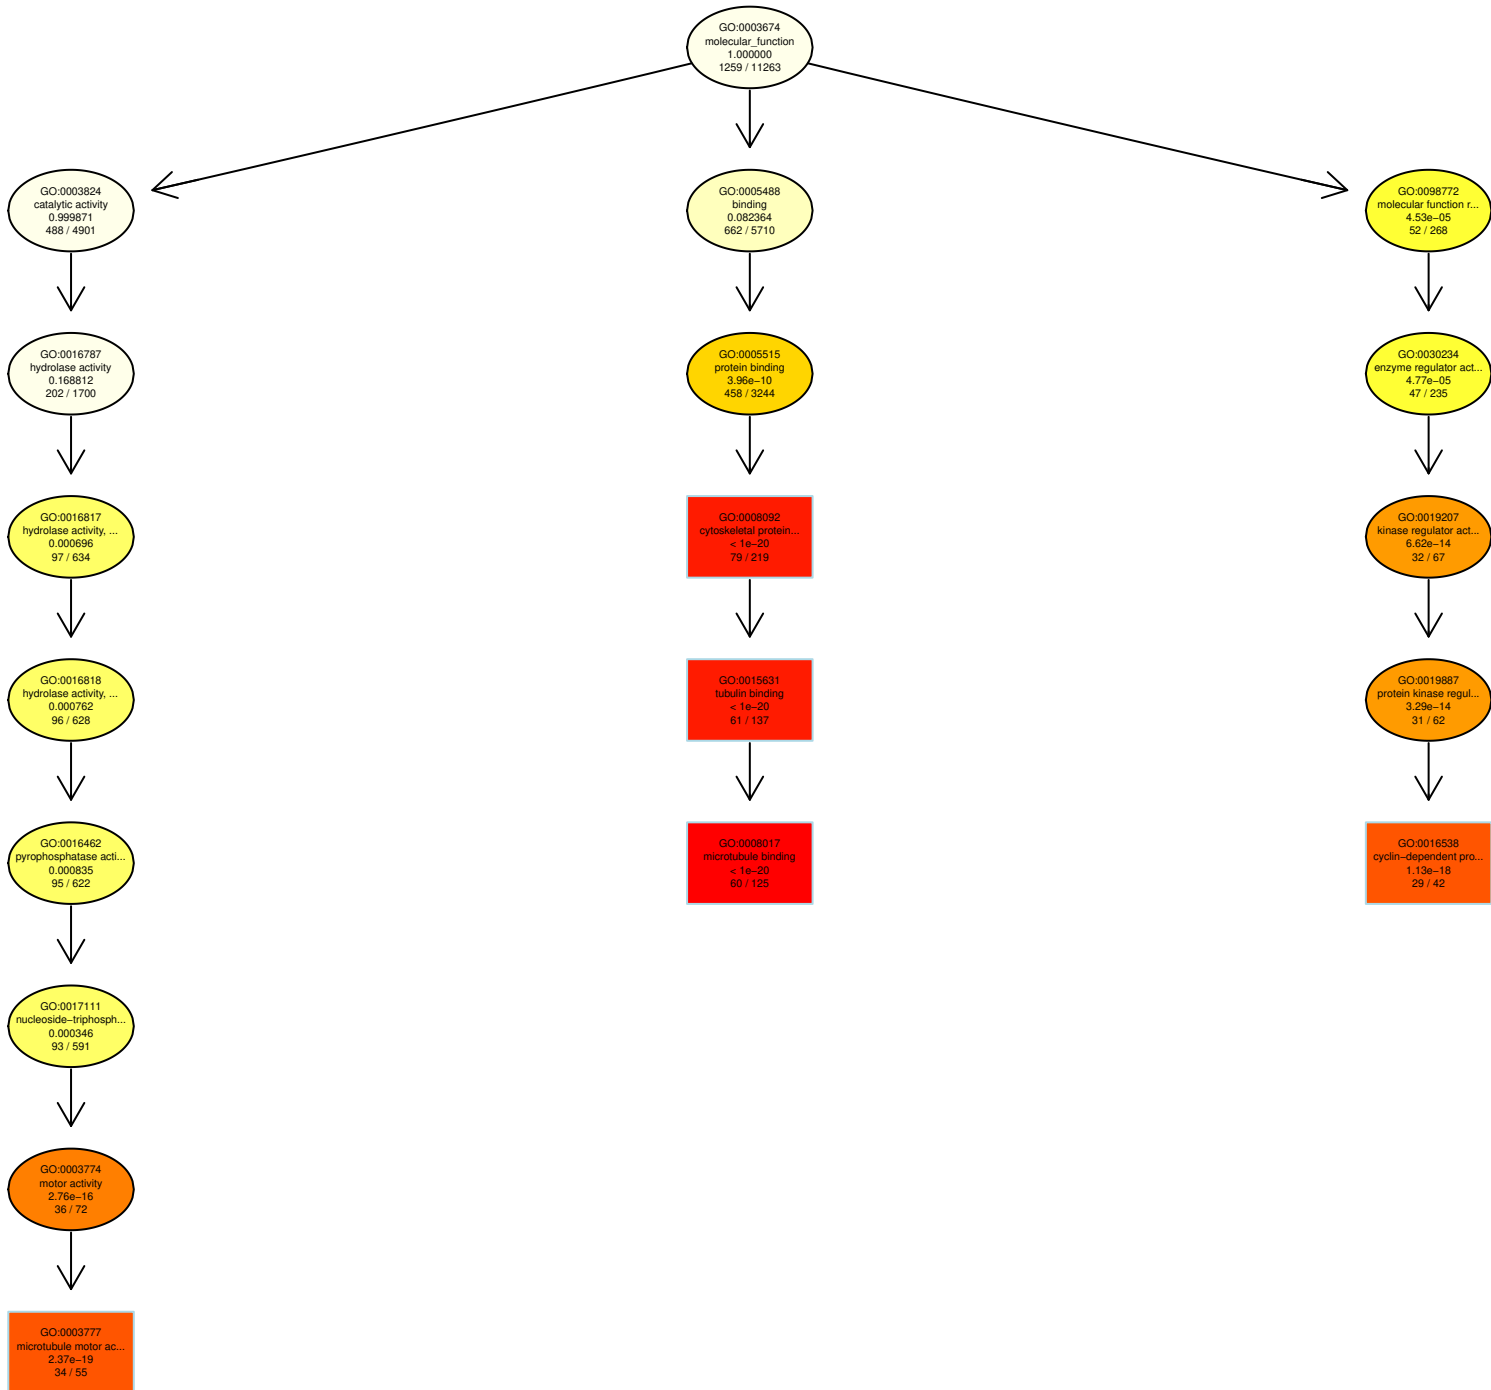

Supplement: PLD3-6-e396-s322.pdf [file PLD3-6-e396-s322.pdf]

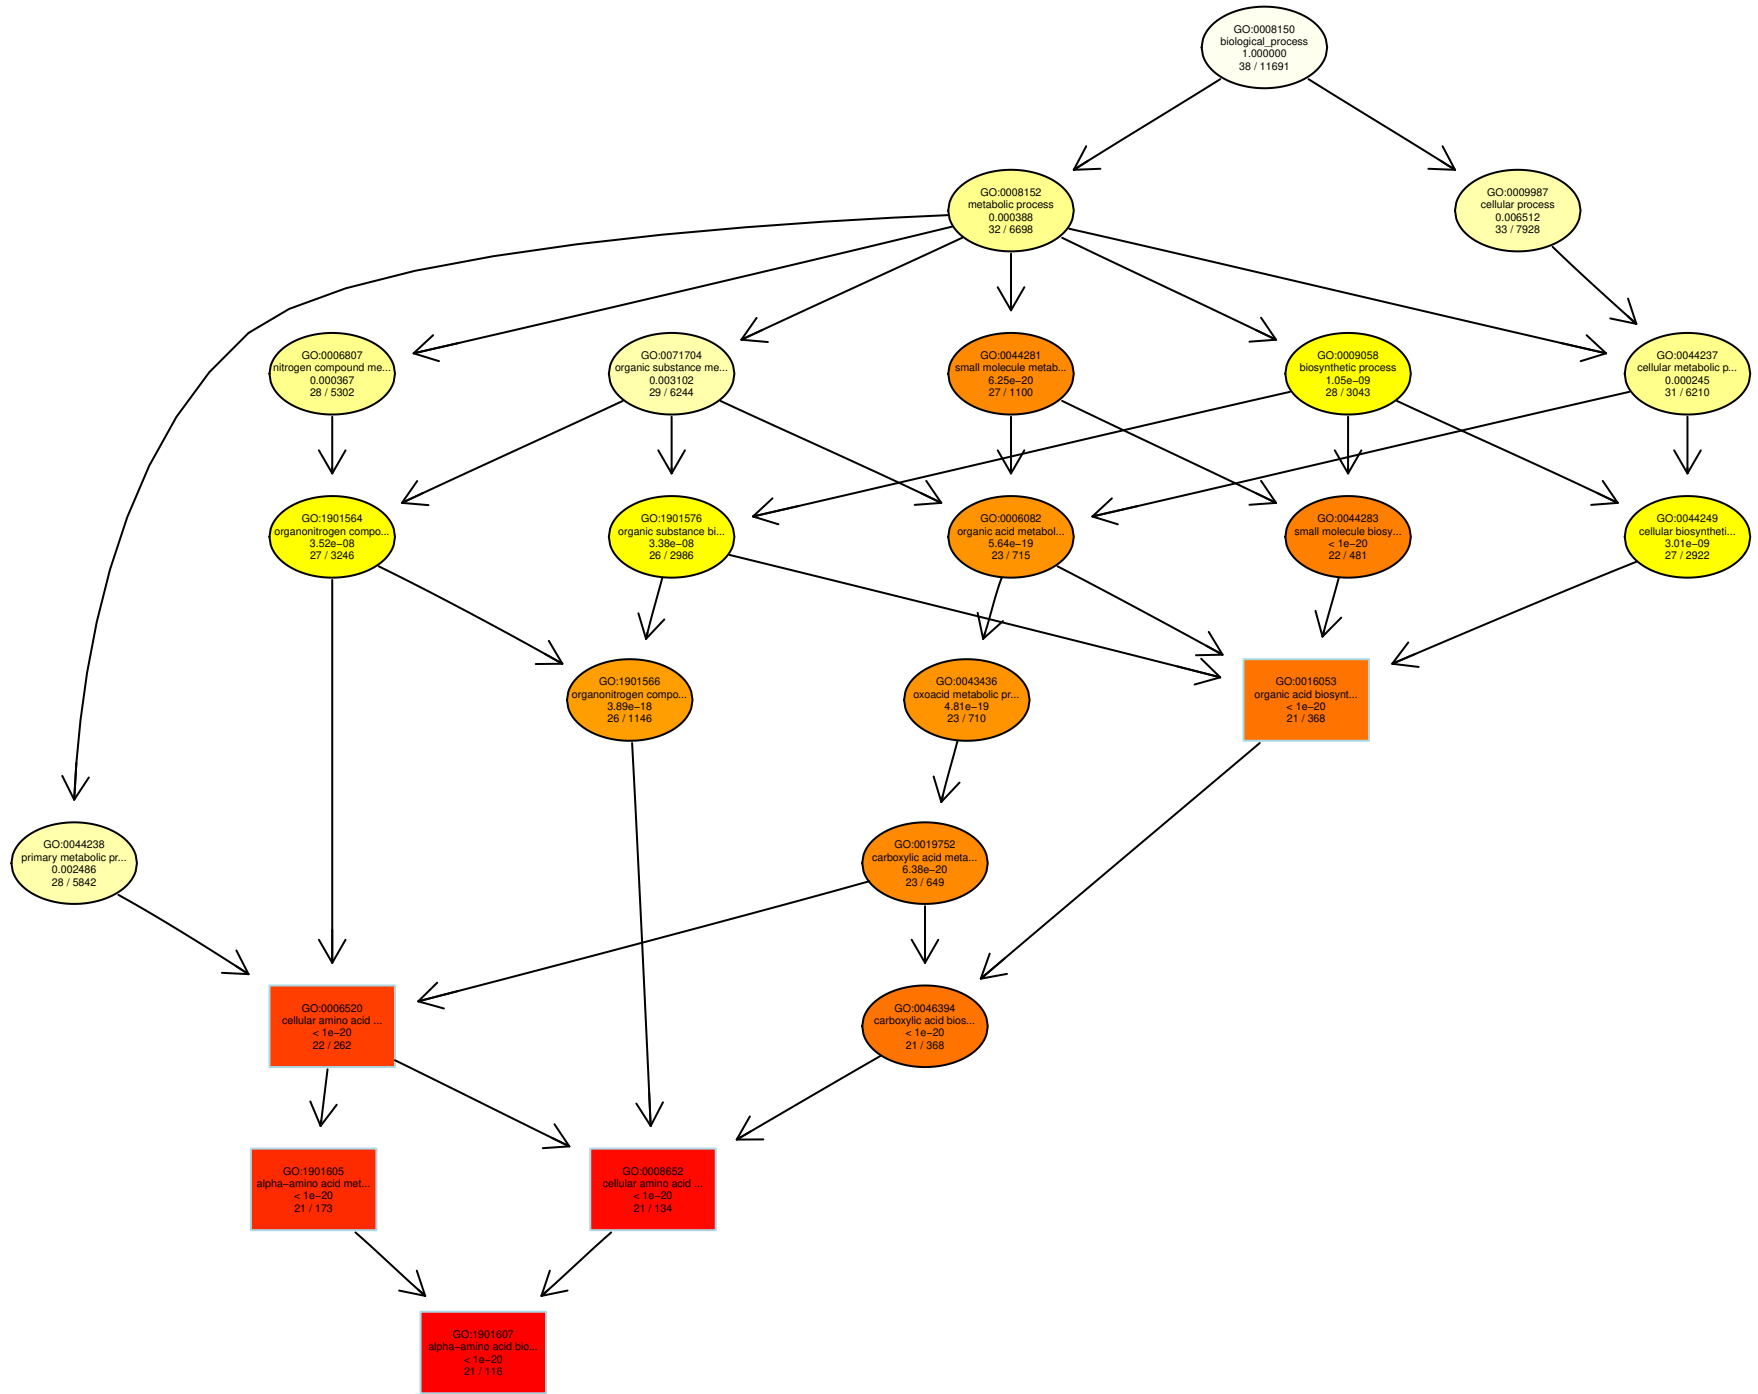

Supplement: PLD3-6-e396-s323.pdf [file PLD3-6-e396-s323.pdf]

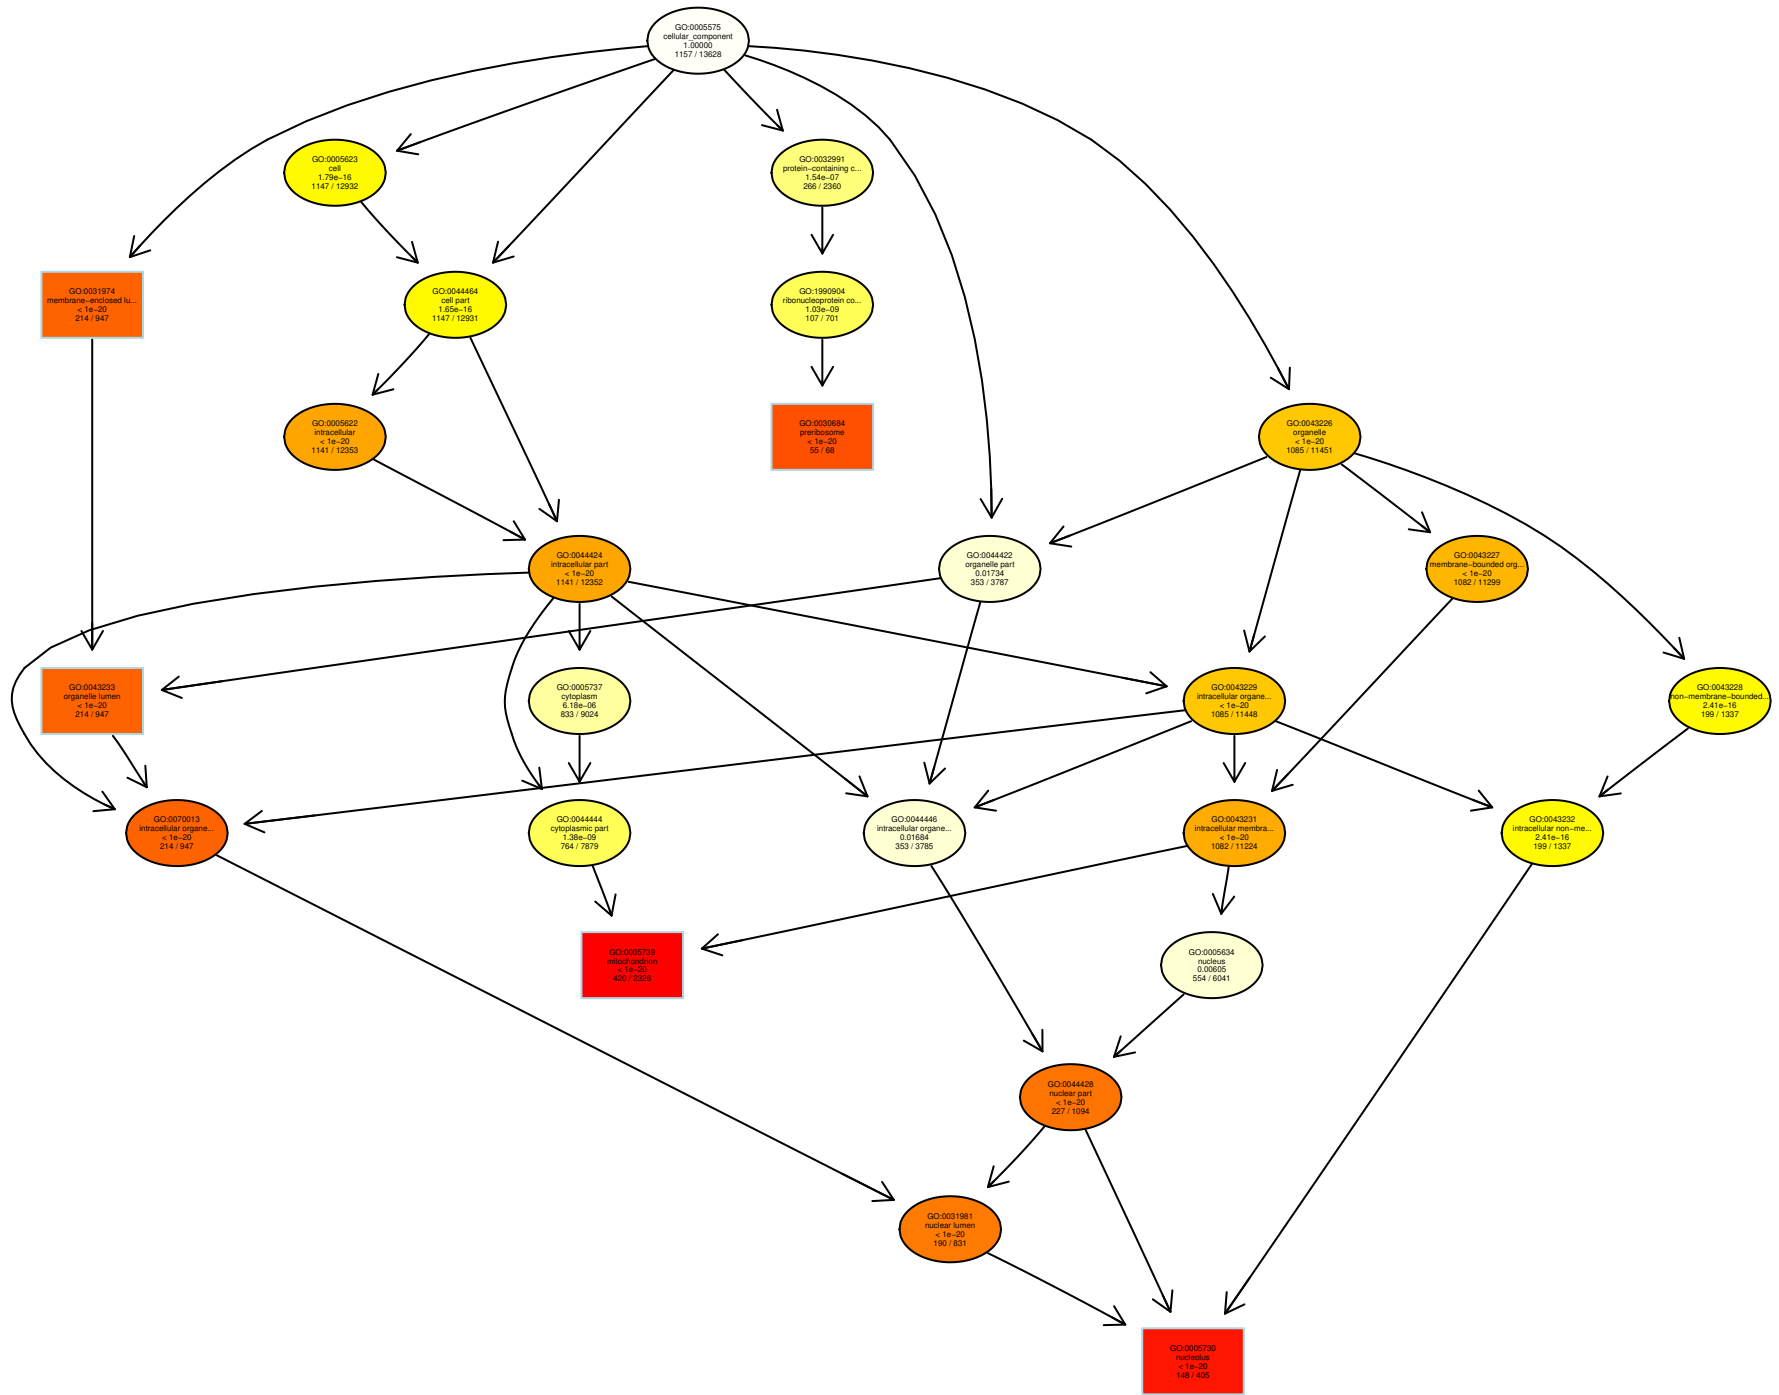

Supplement: PLD3-6-e396-s325.pdf [file PLD3-6-e396-s325.pdf]

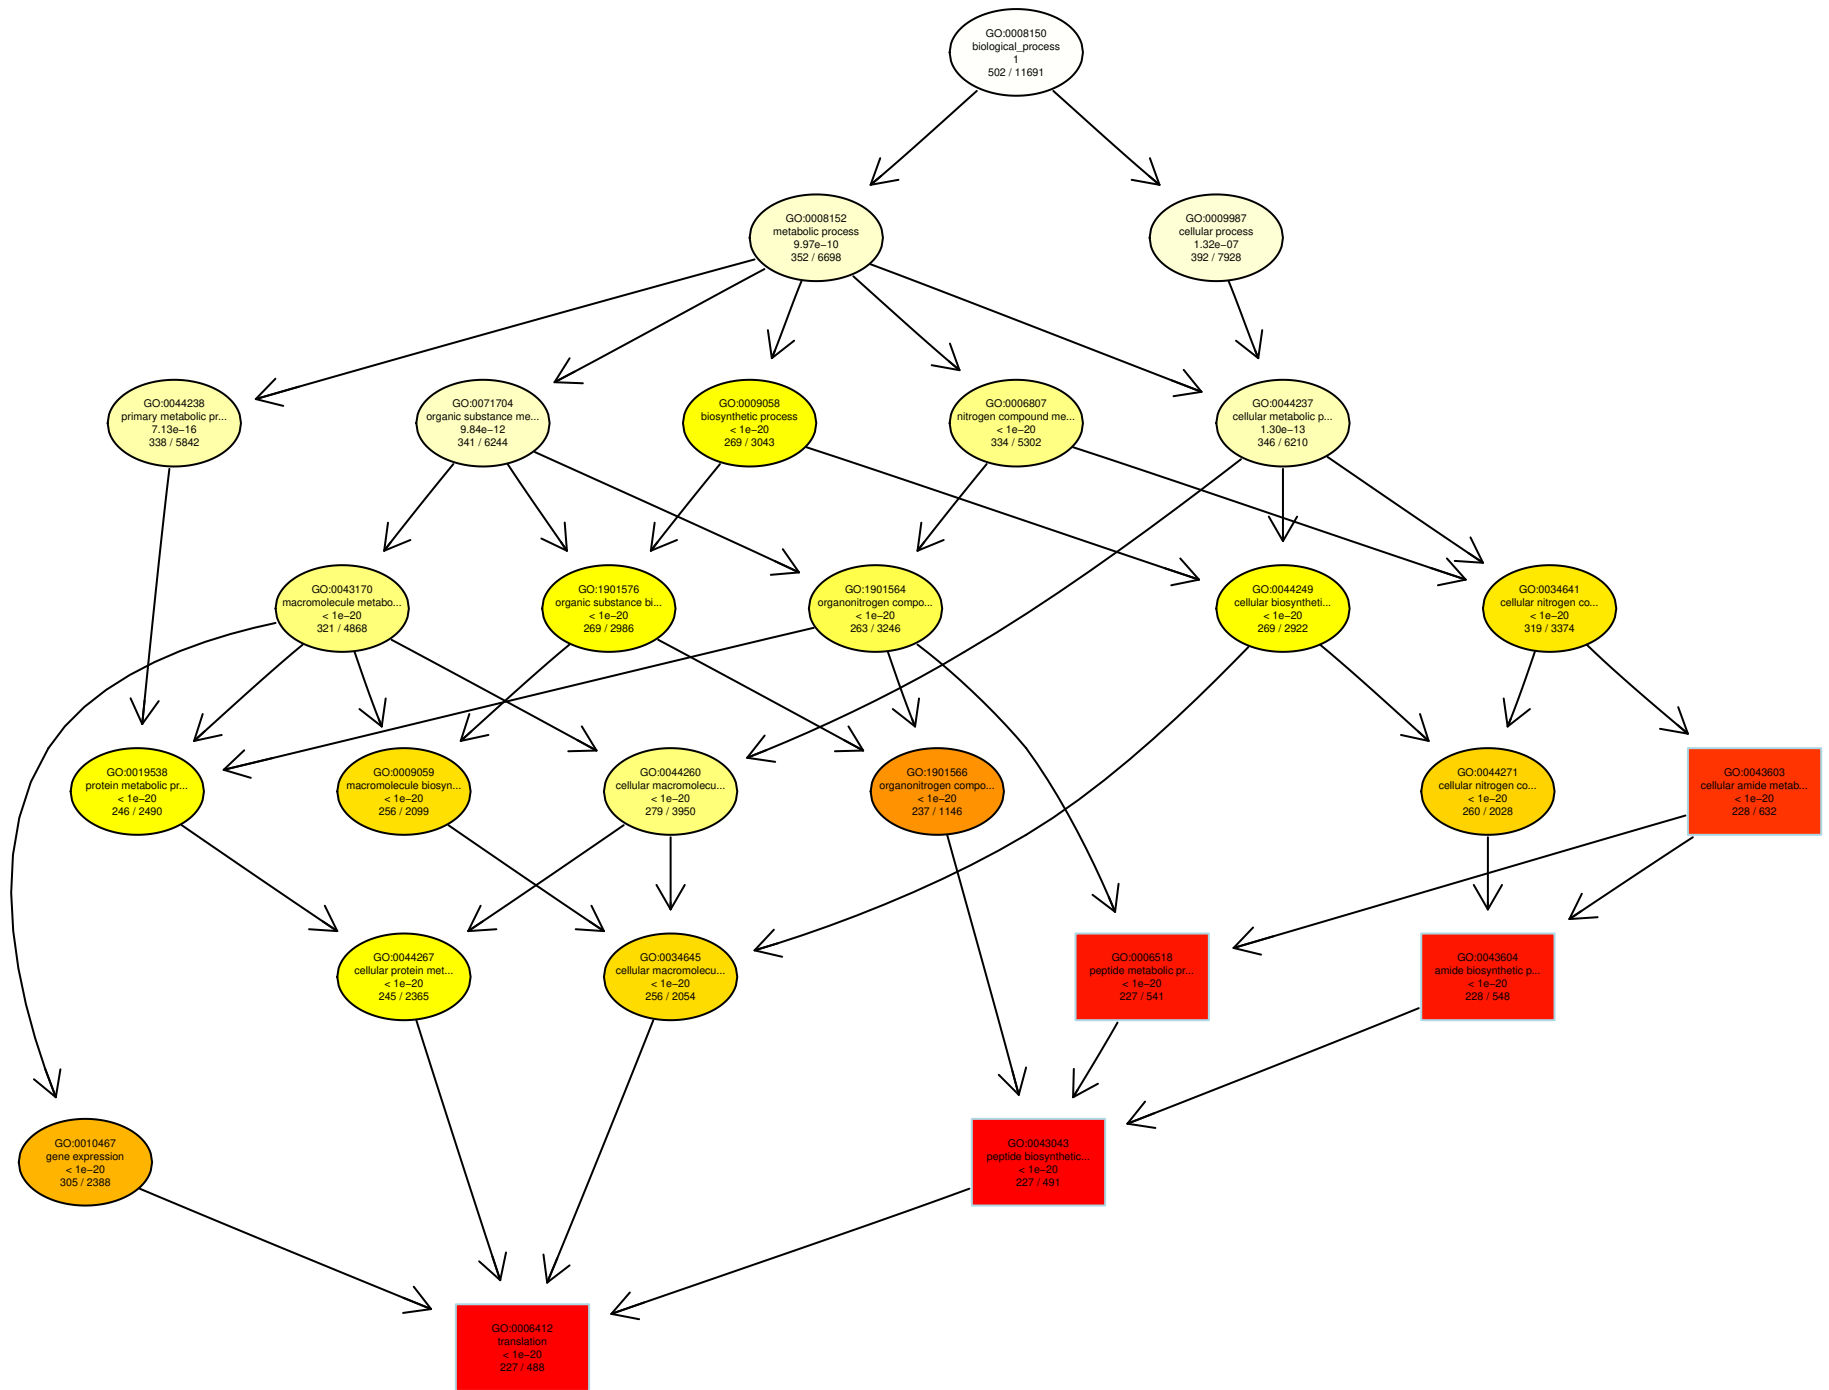

Supplement: PLD3-6-e396-s332.pdf [file PLD3-6-e396-s332.pdf]

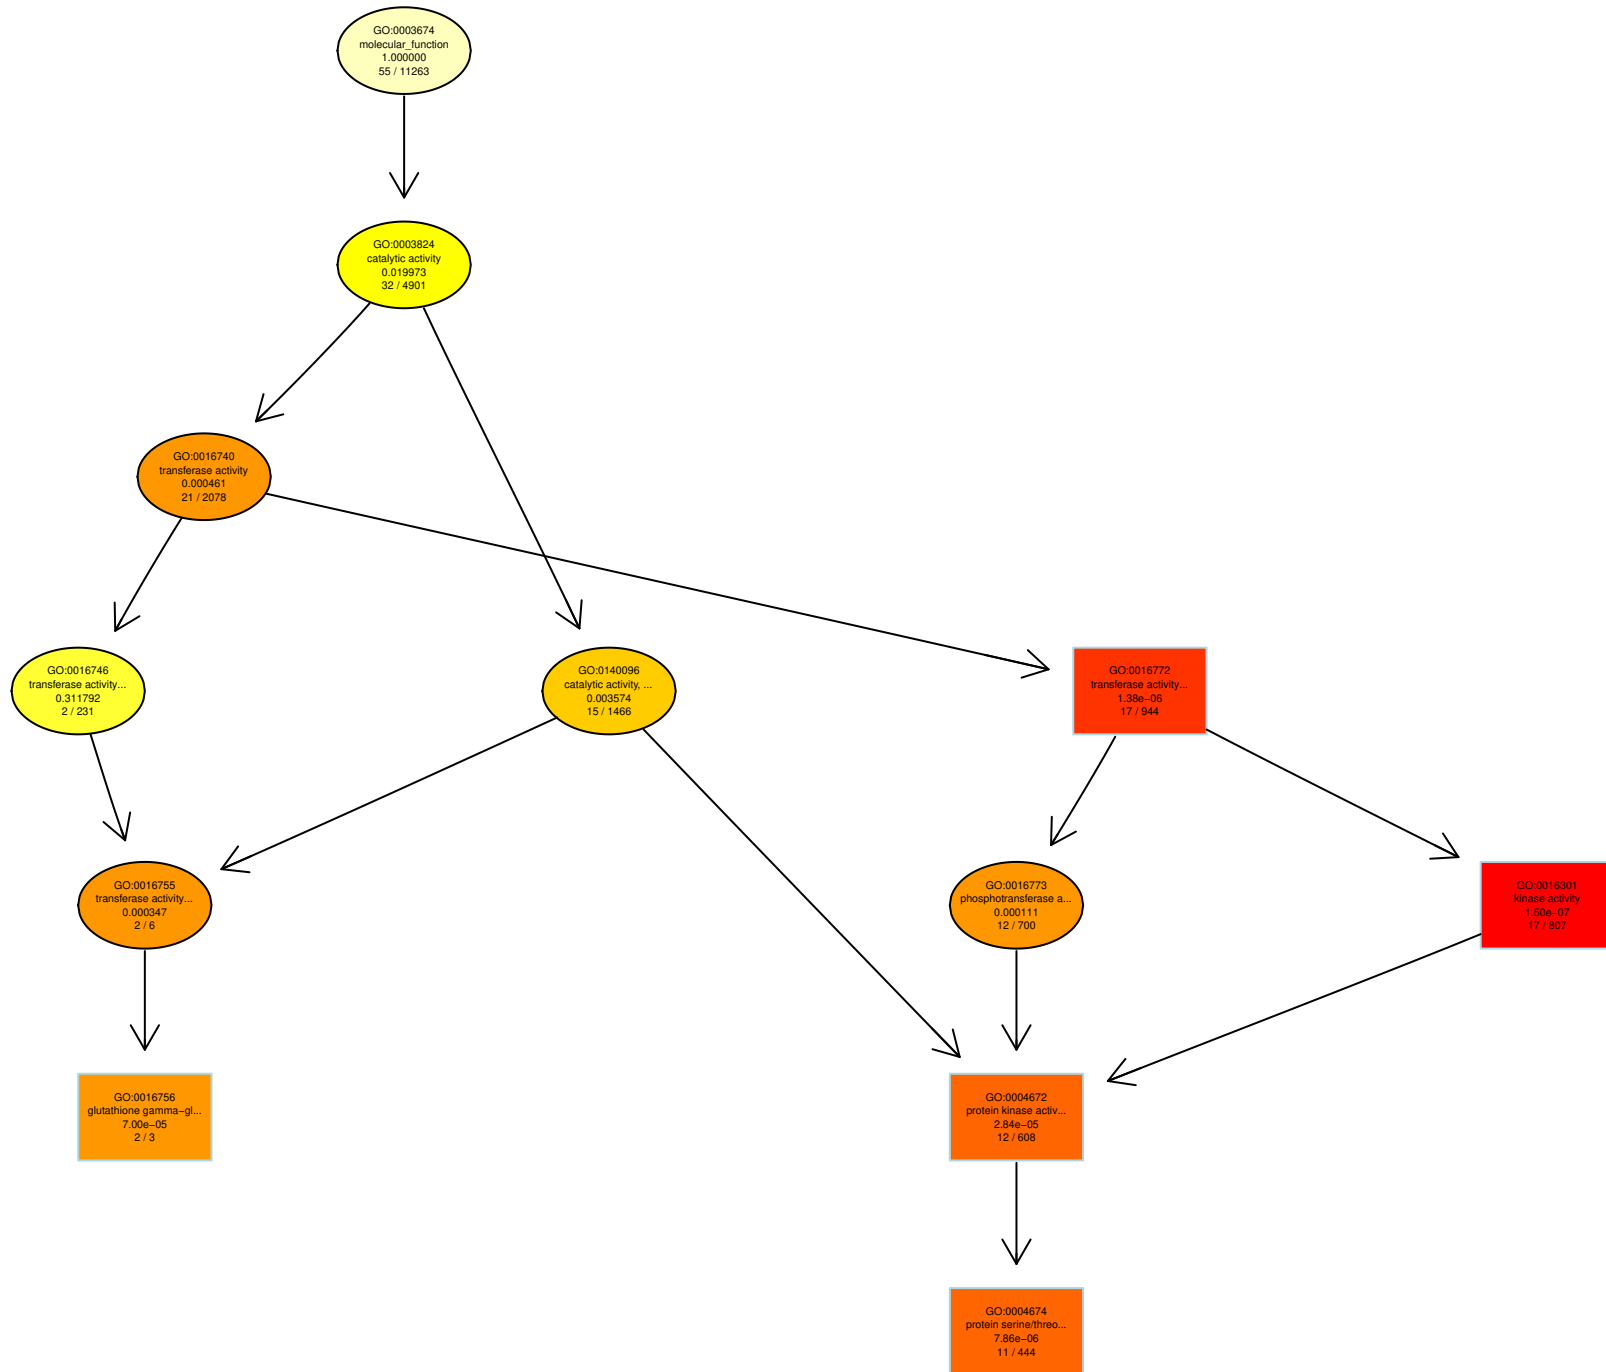

Supplement: PLD3-6-e396-s333.pdf [file PLD3-6-e396-s333.pdf]

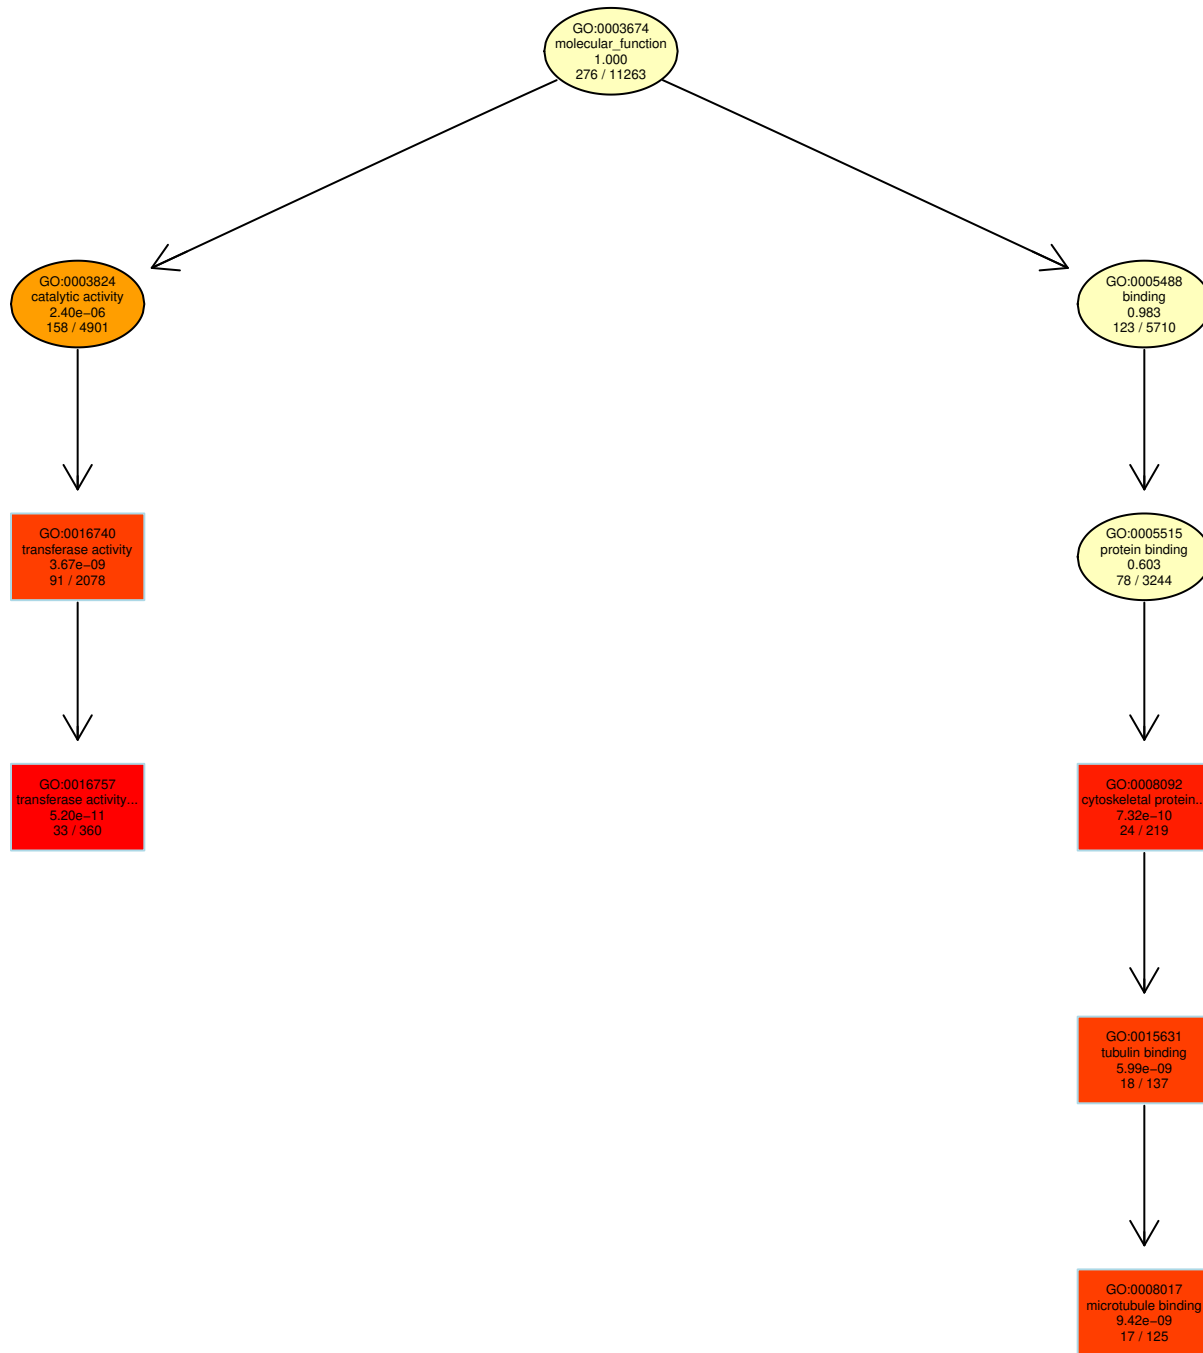

Supplement: PLD3-6-e396-s336.pdf [file PLD3-6-e396-s336.pdf]

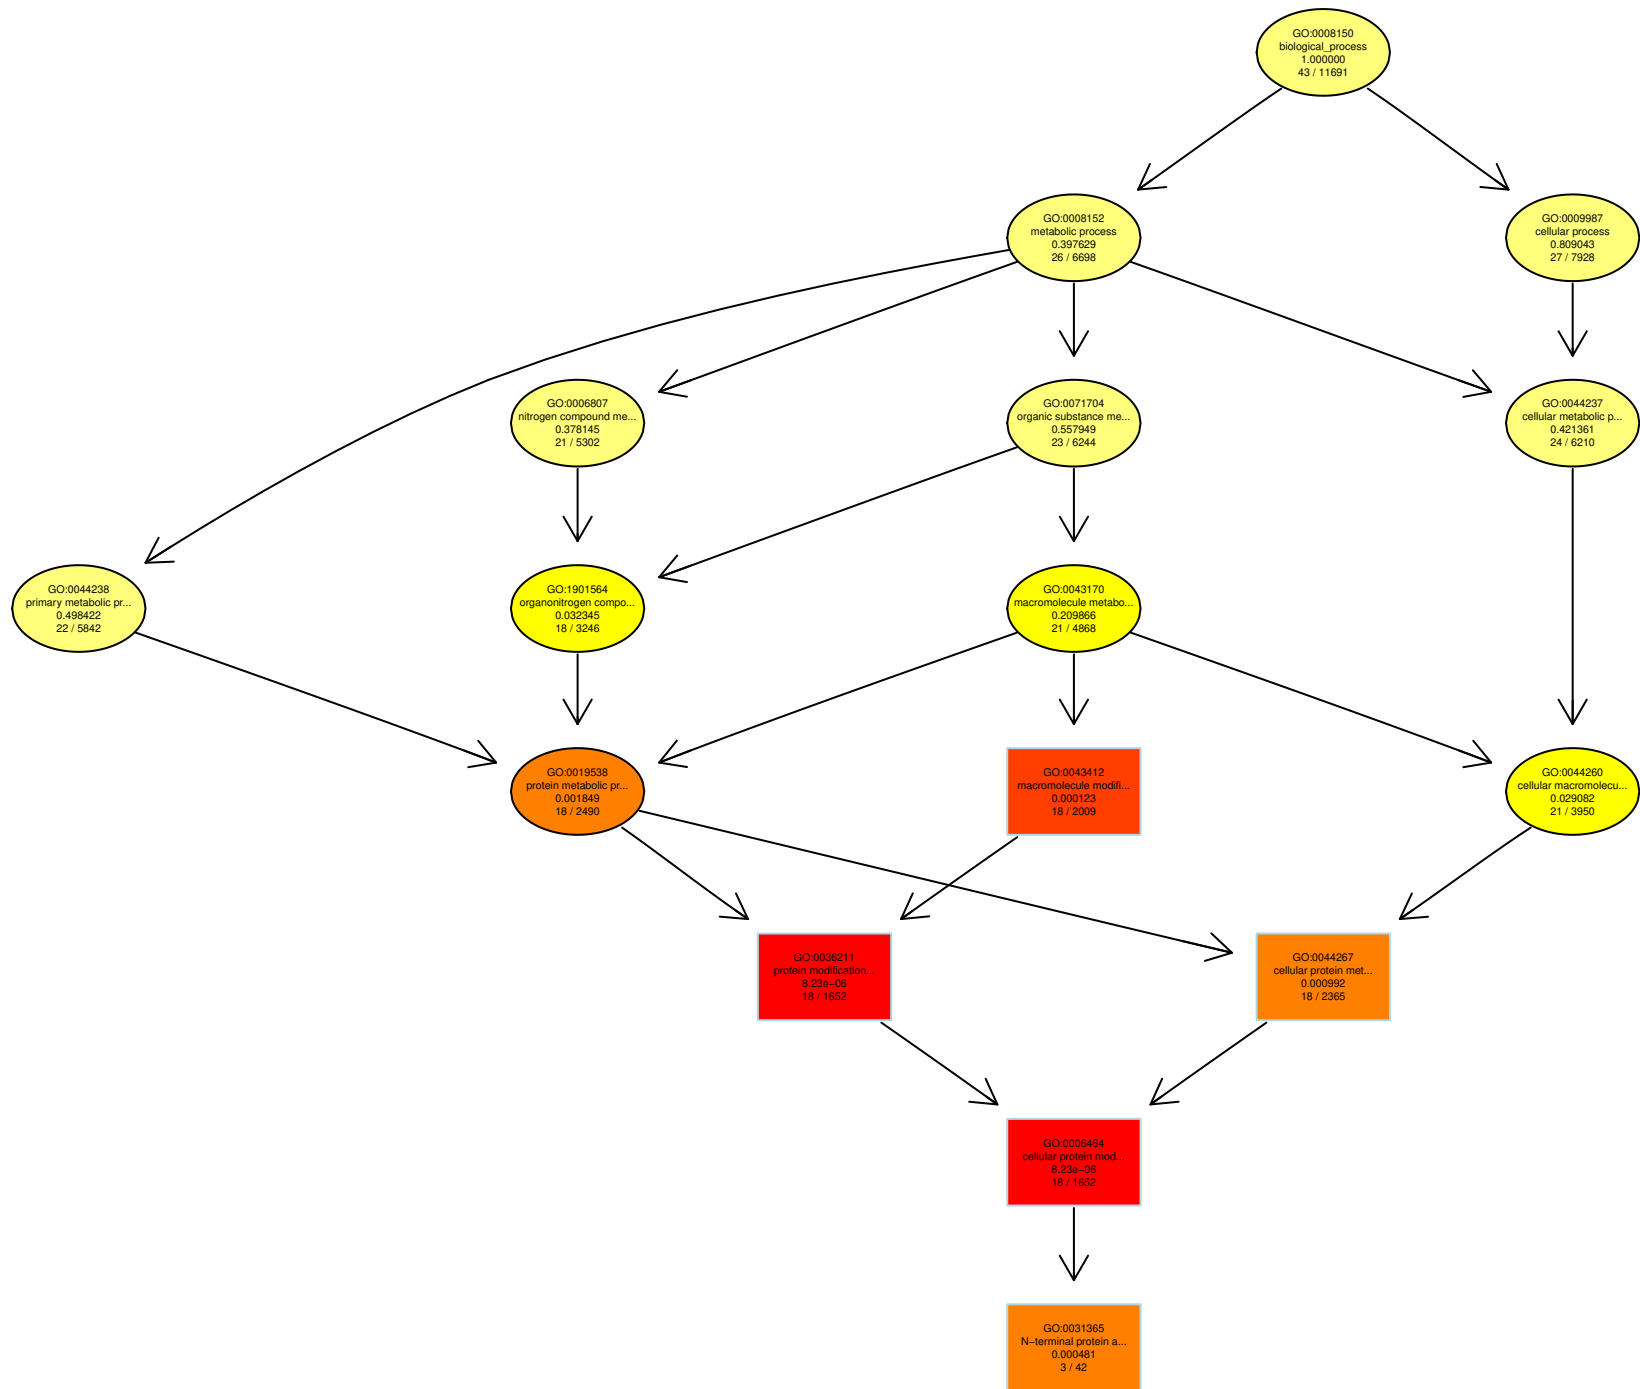

Supplement: PLD3-6-e396-s337.pdf [file PLD3-6-e396-s337.pdf]

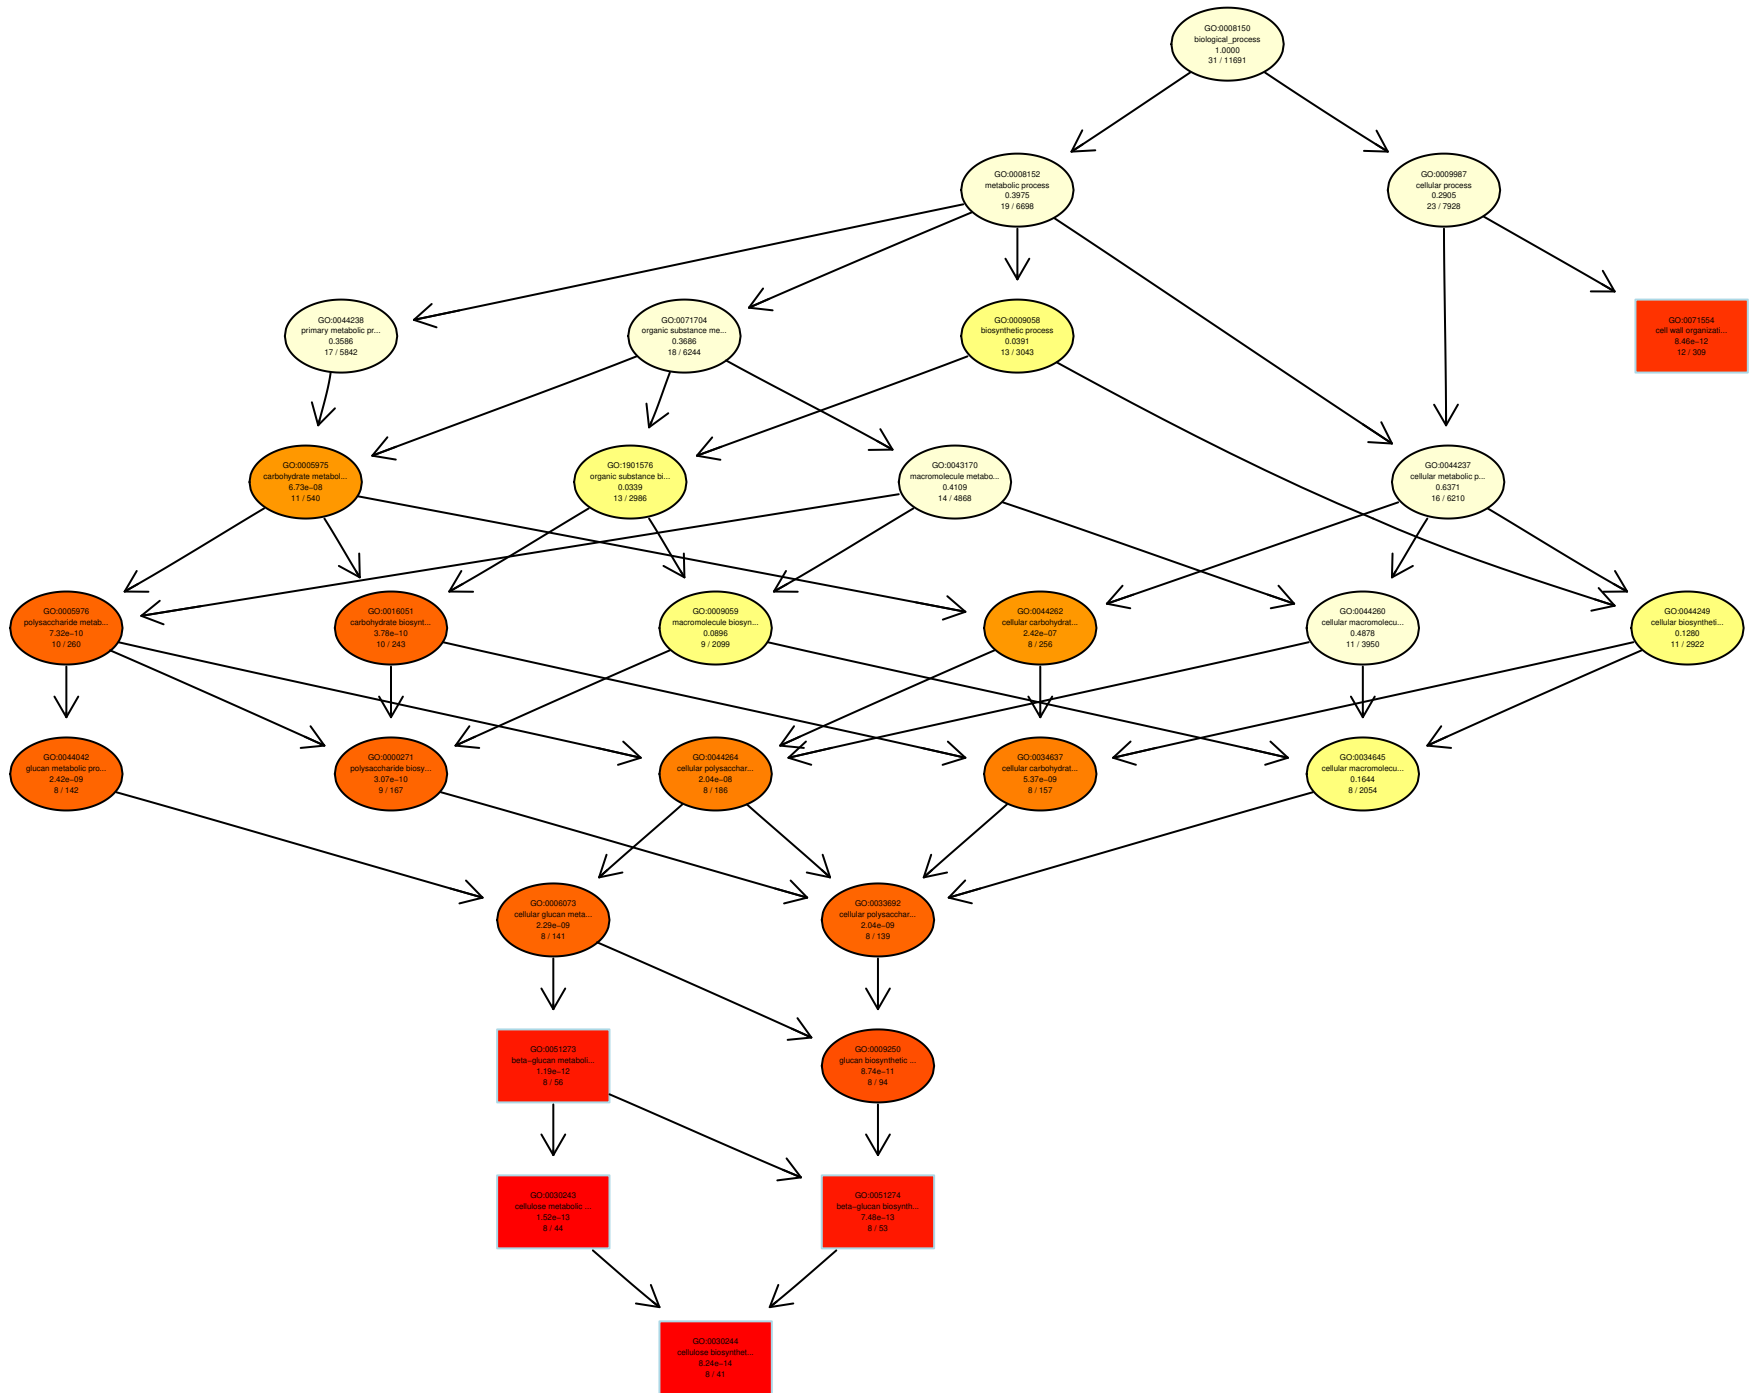

Supplement: PLD3-6-e396-s340.pdf [file PLD3-6-e396-s340.pdf]

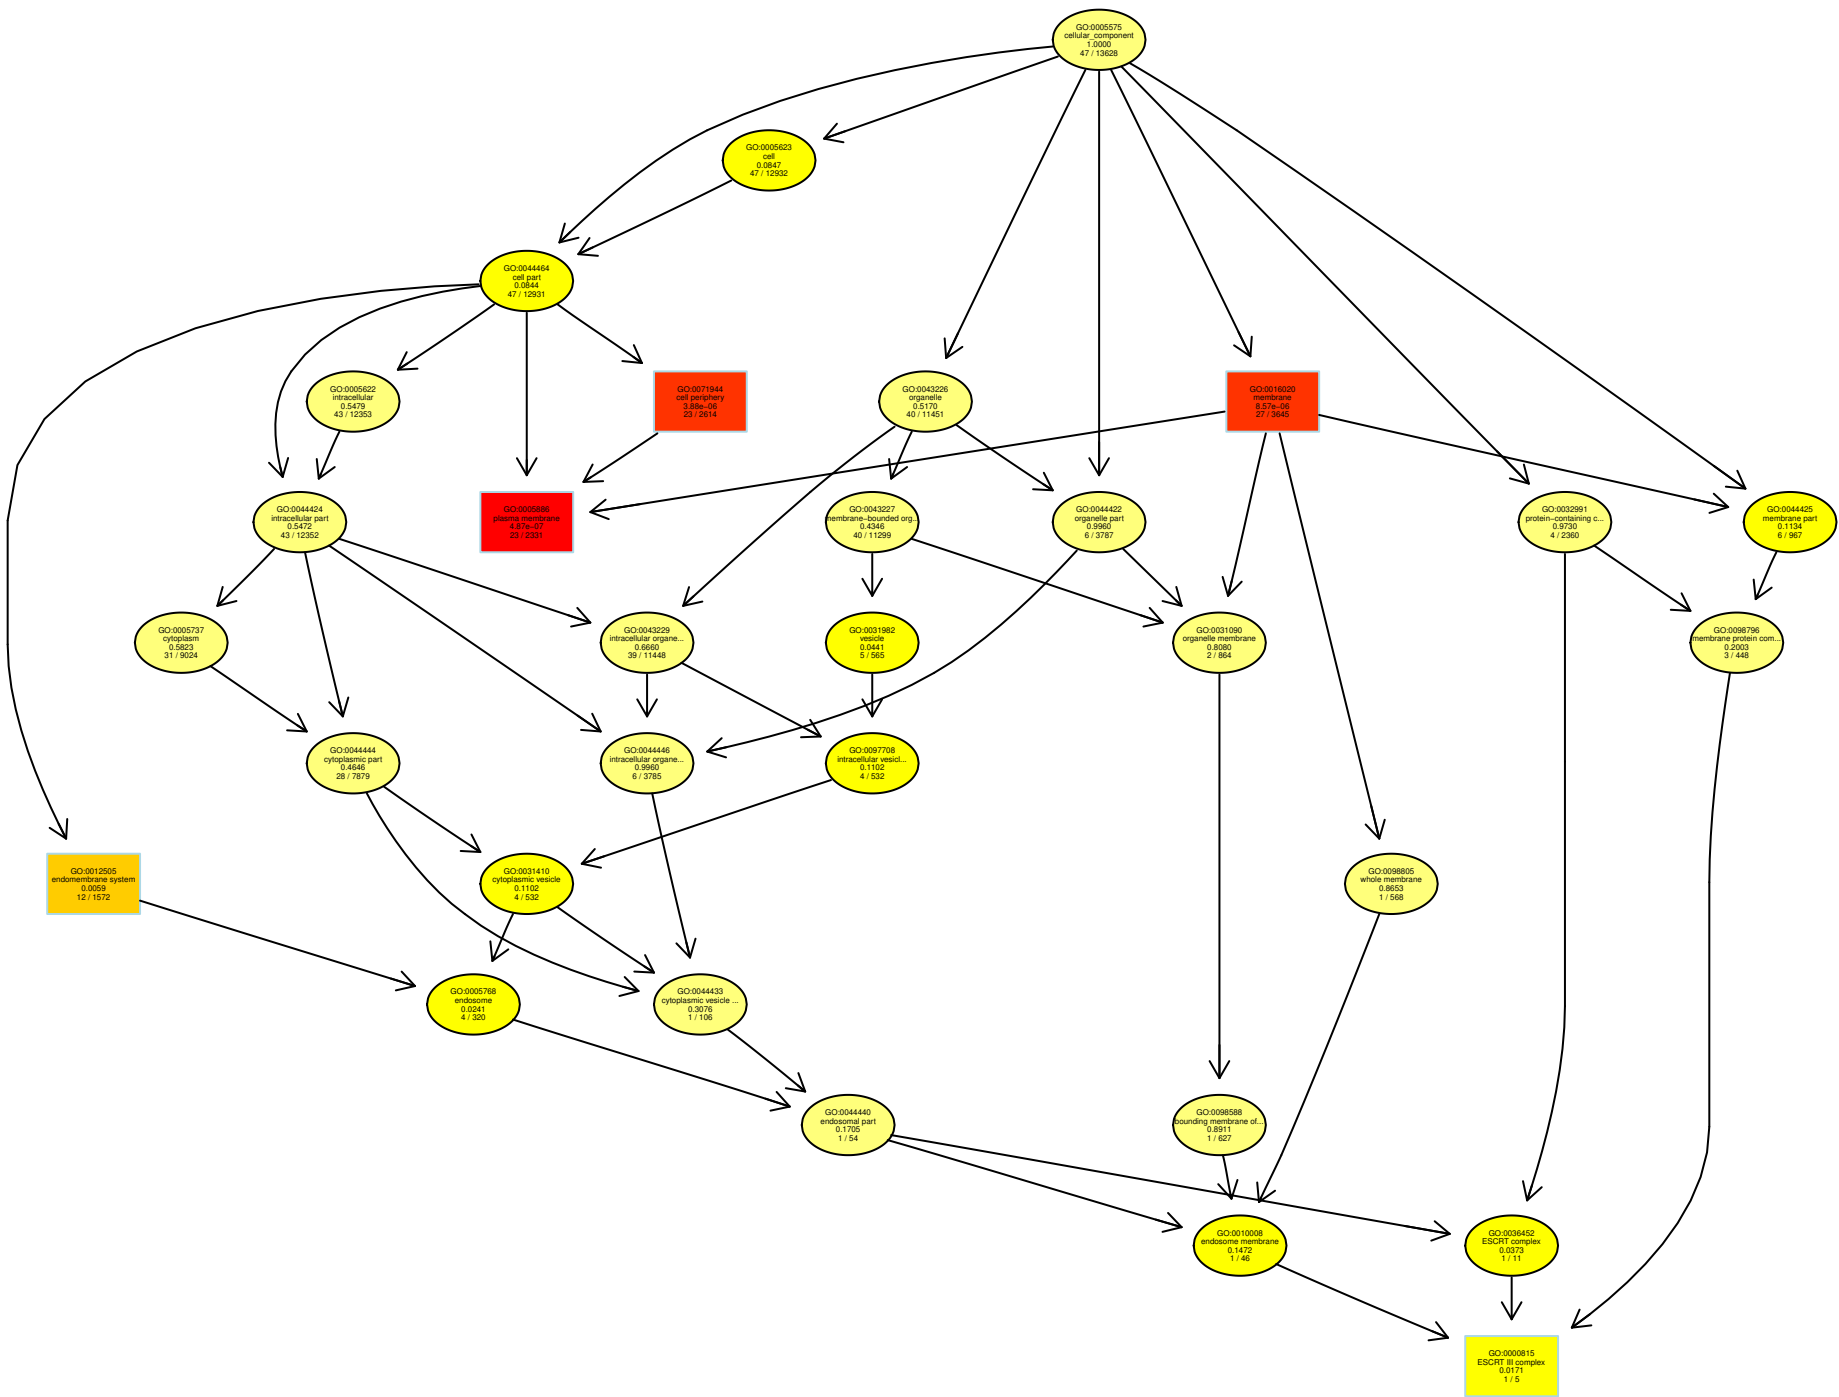

Supplement: PLD3-6-e396-s347.pdf [file PLD3-6-e396-s347.pdf]

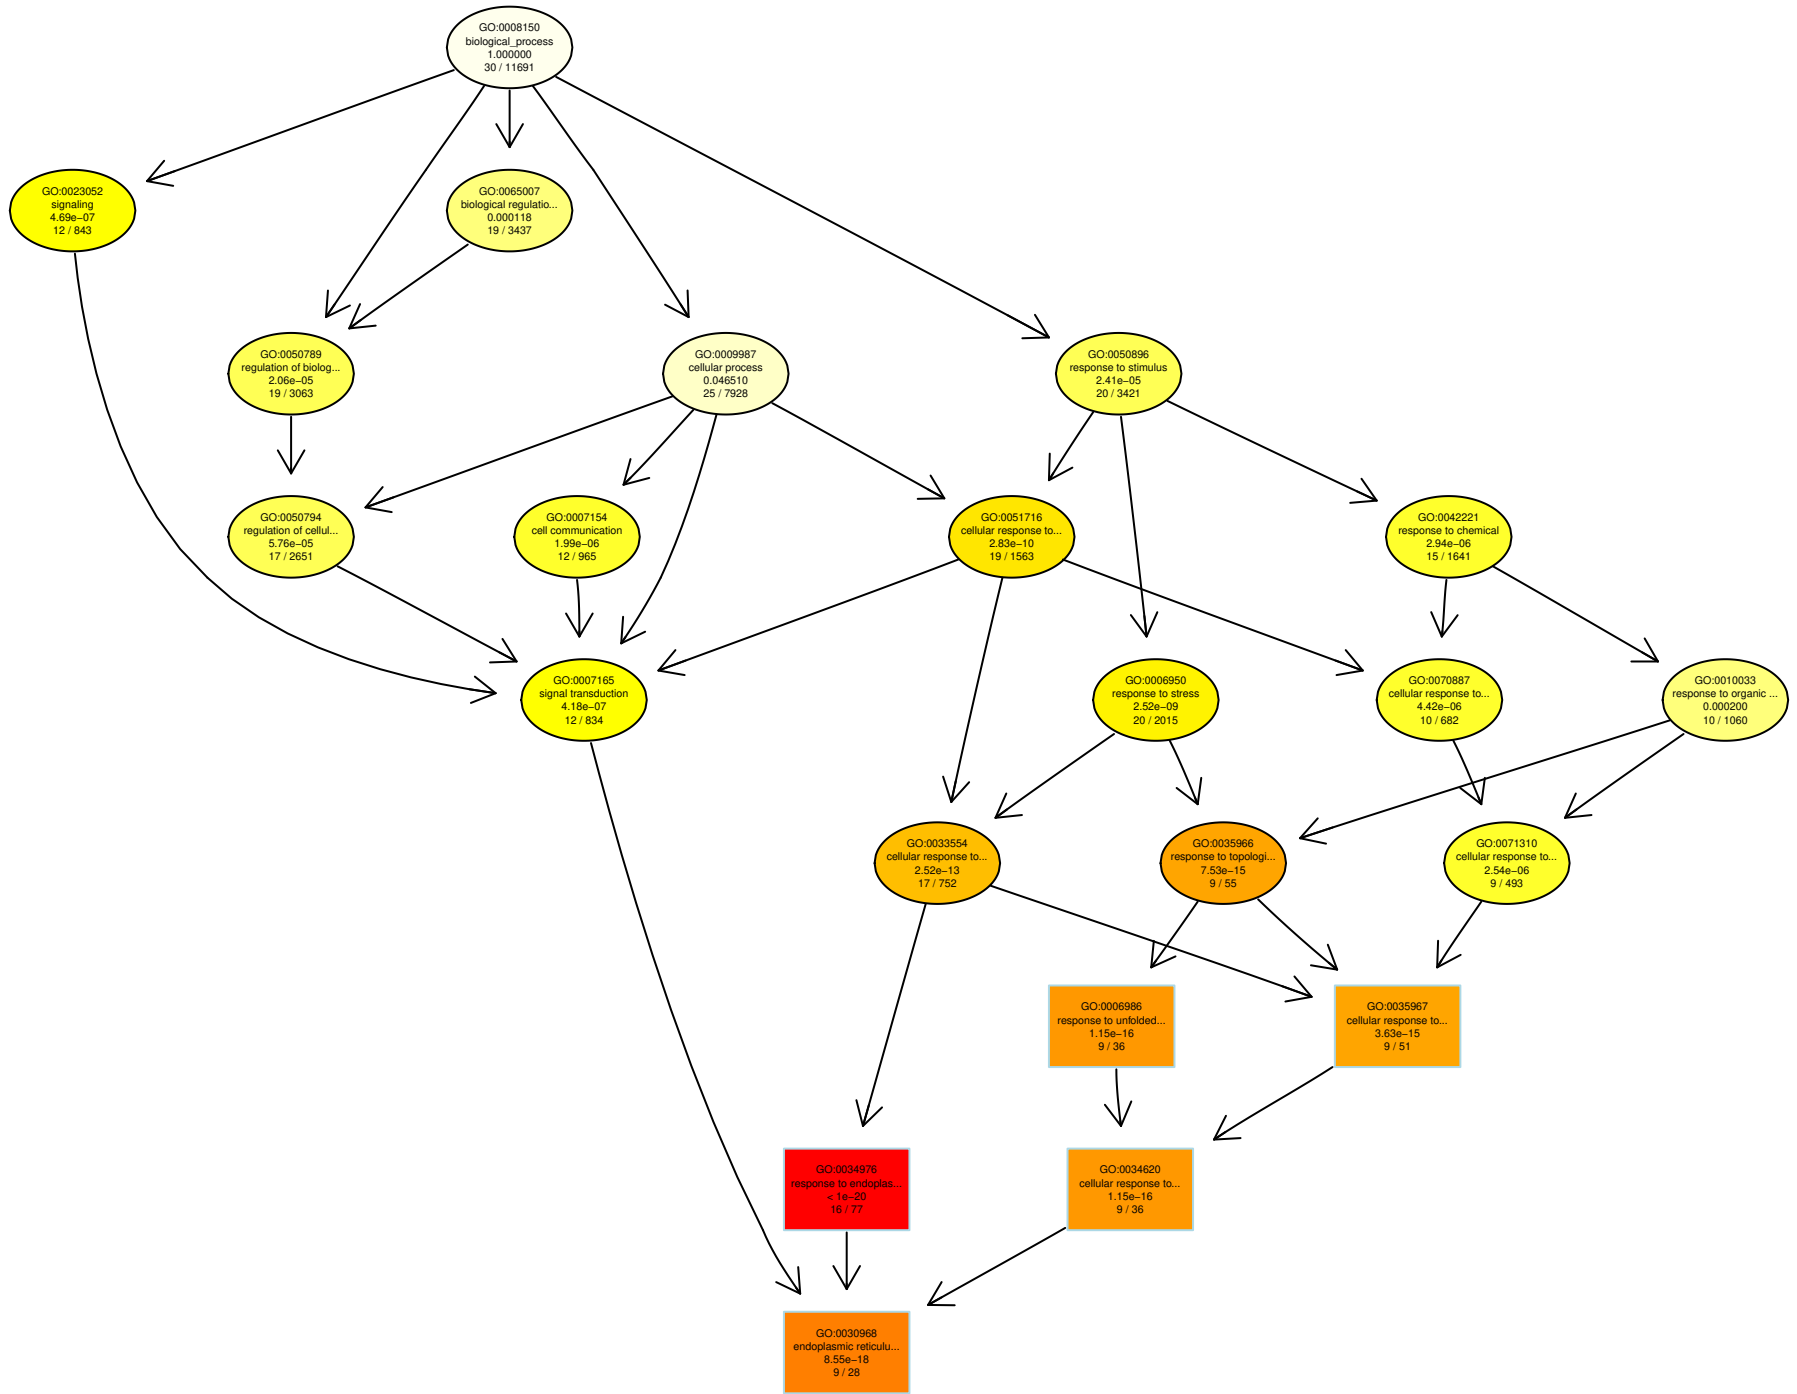

Supplement: PLD3-6-e396-s348.pdf [file PLD3-6-e396-s348.pdf]

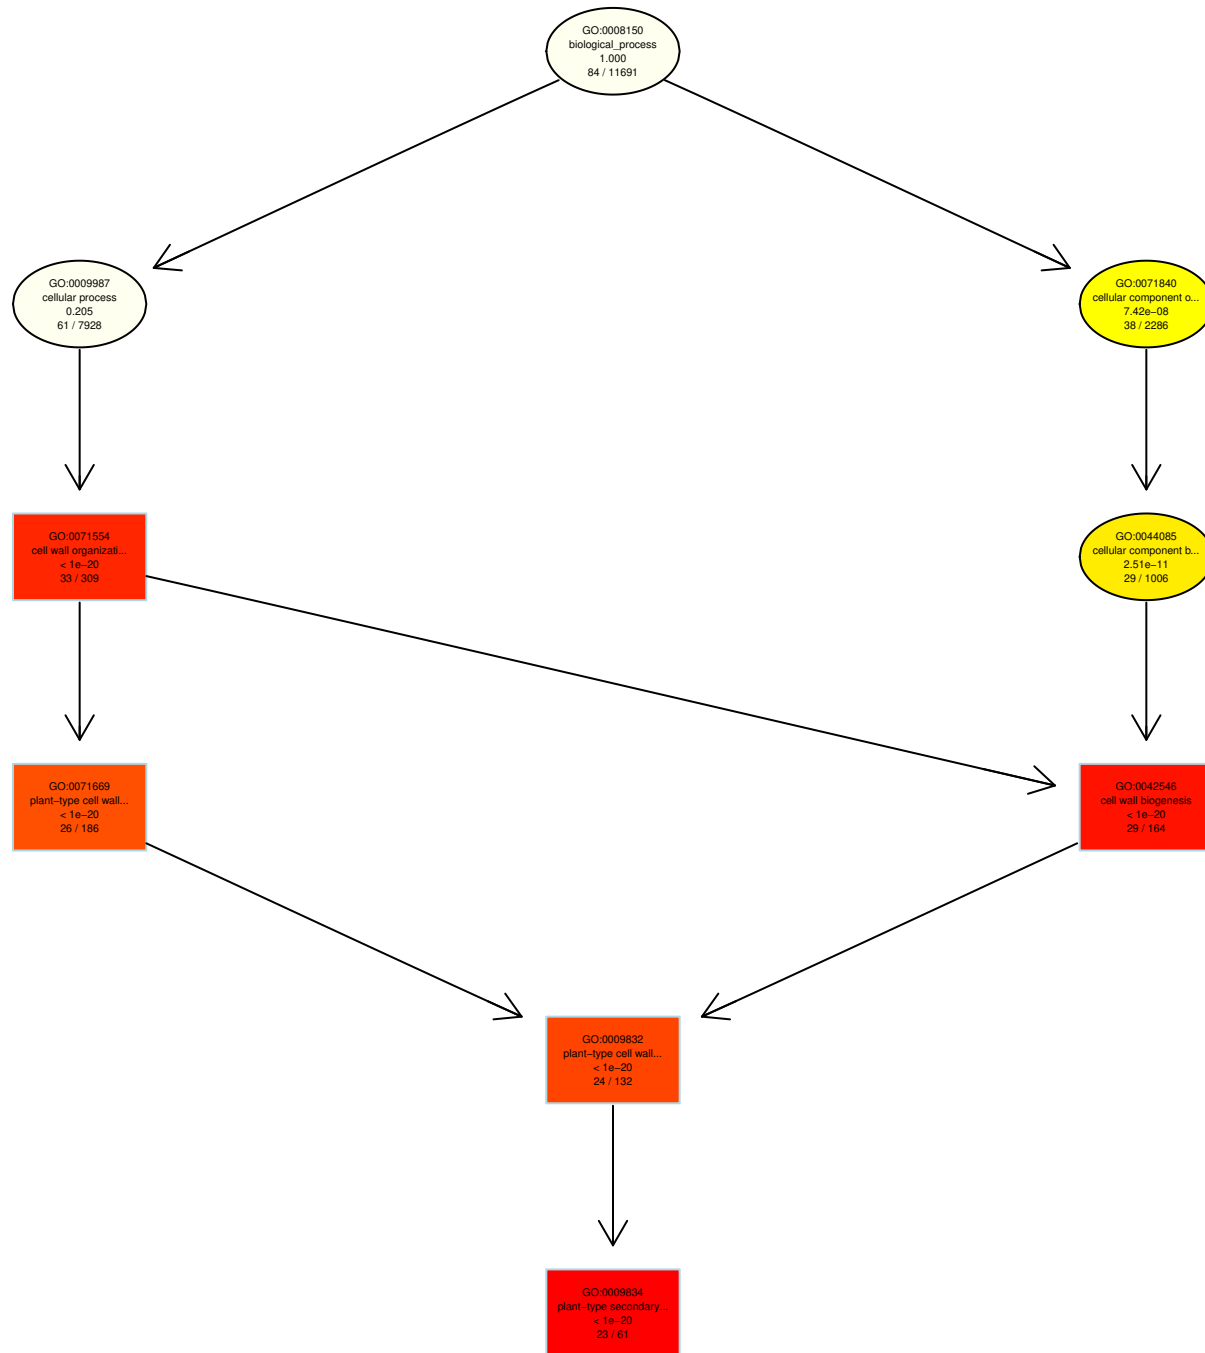

Supplement: PLD3-6-e396-s354.pdf [file PLD3-6-e396-s354.pdf]

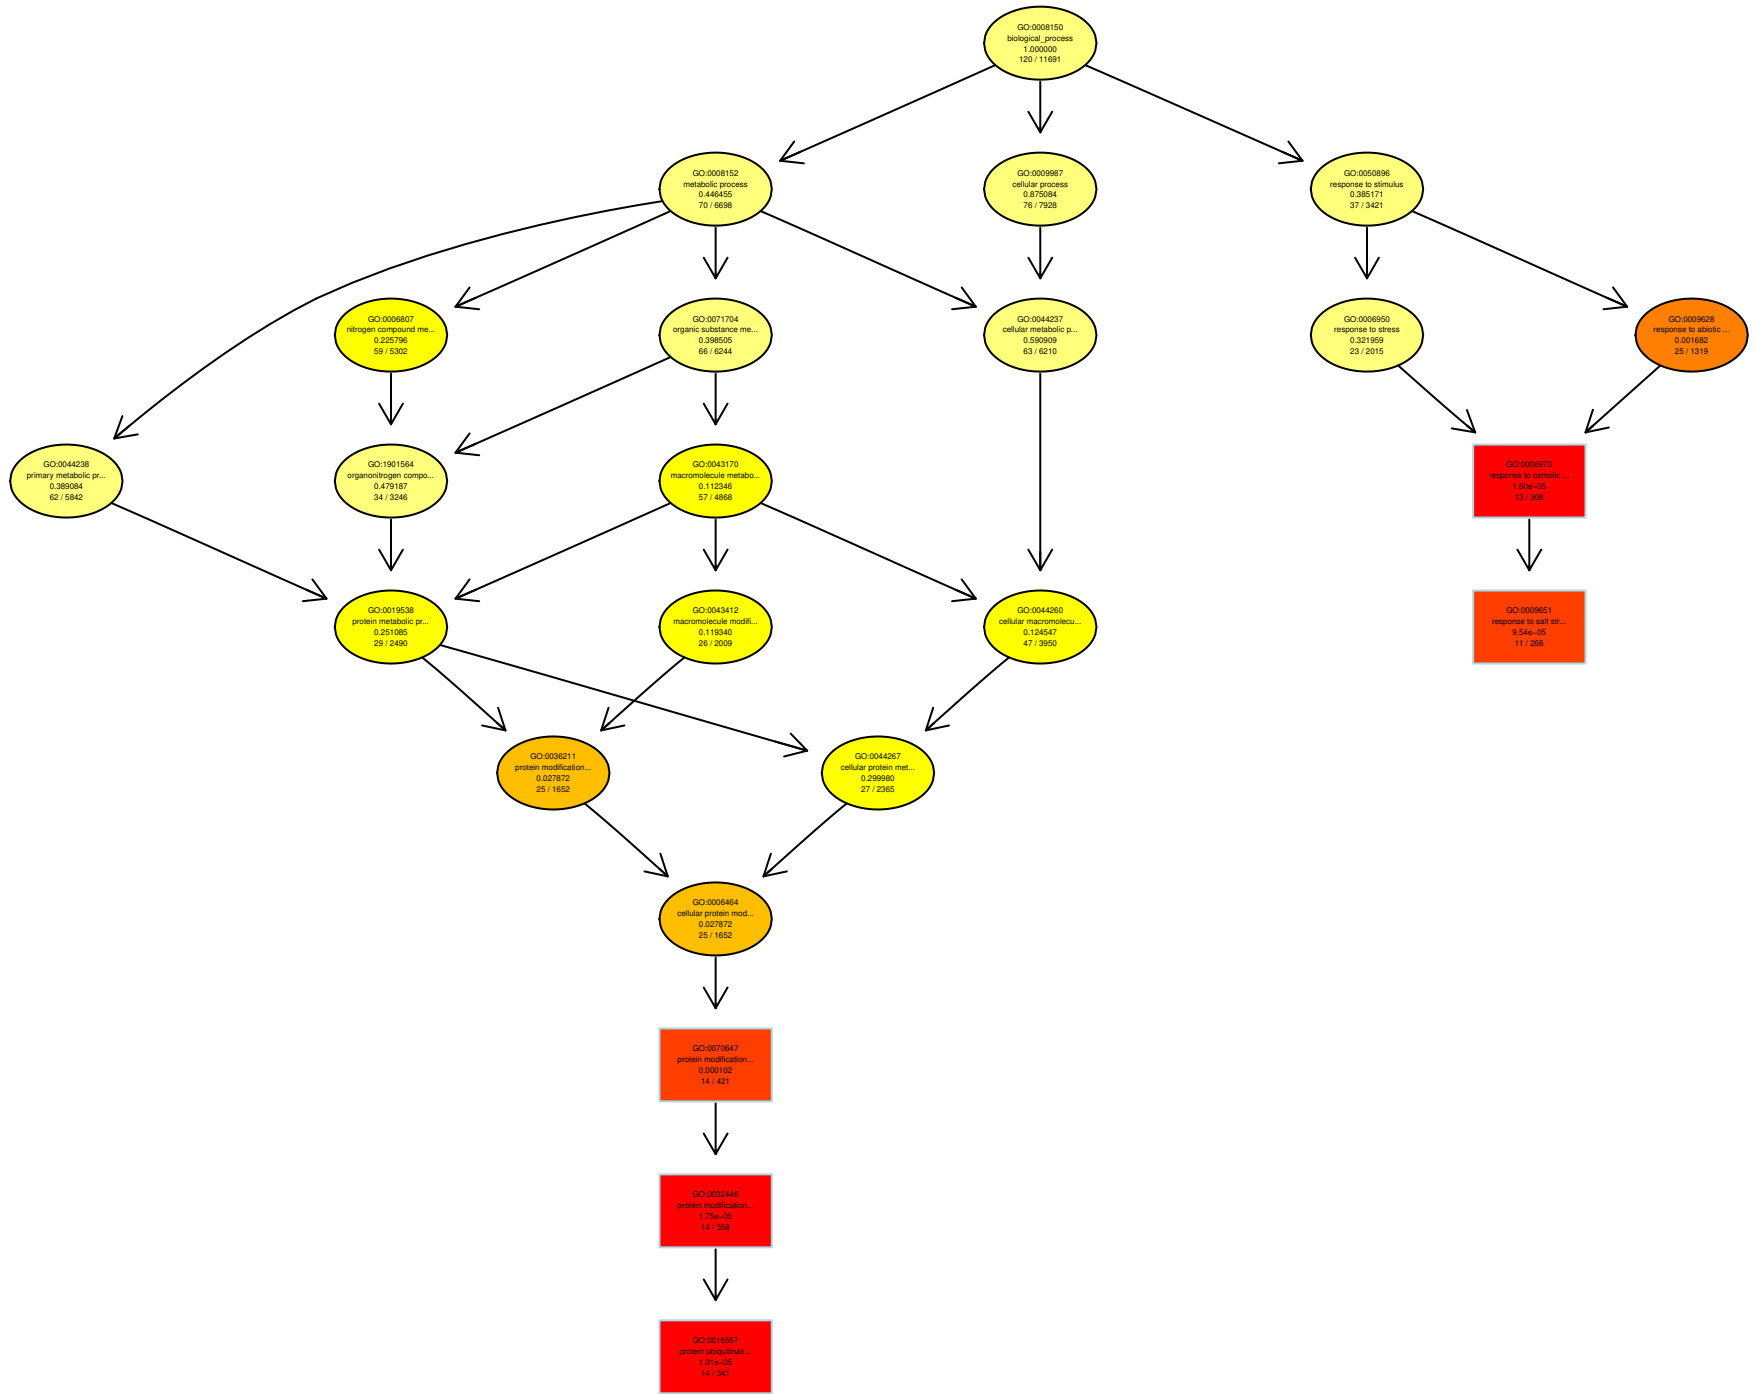

Supplement: PLD3-6-e396-s357.pdf [file PLD3-6-e396-s357.pdf]

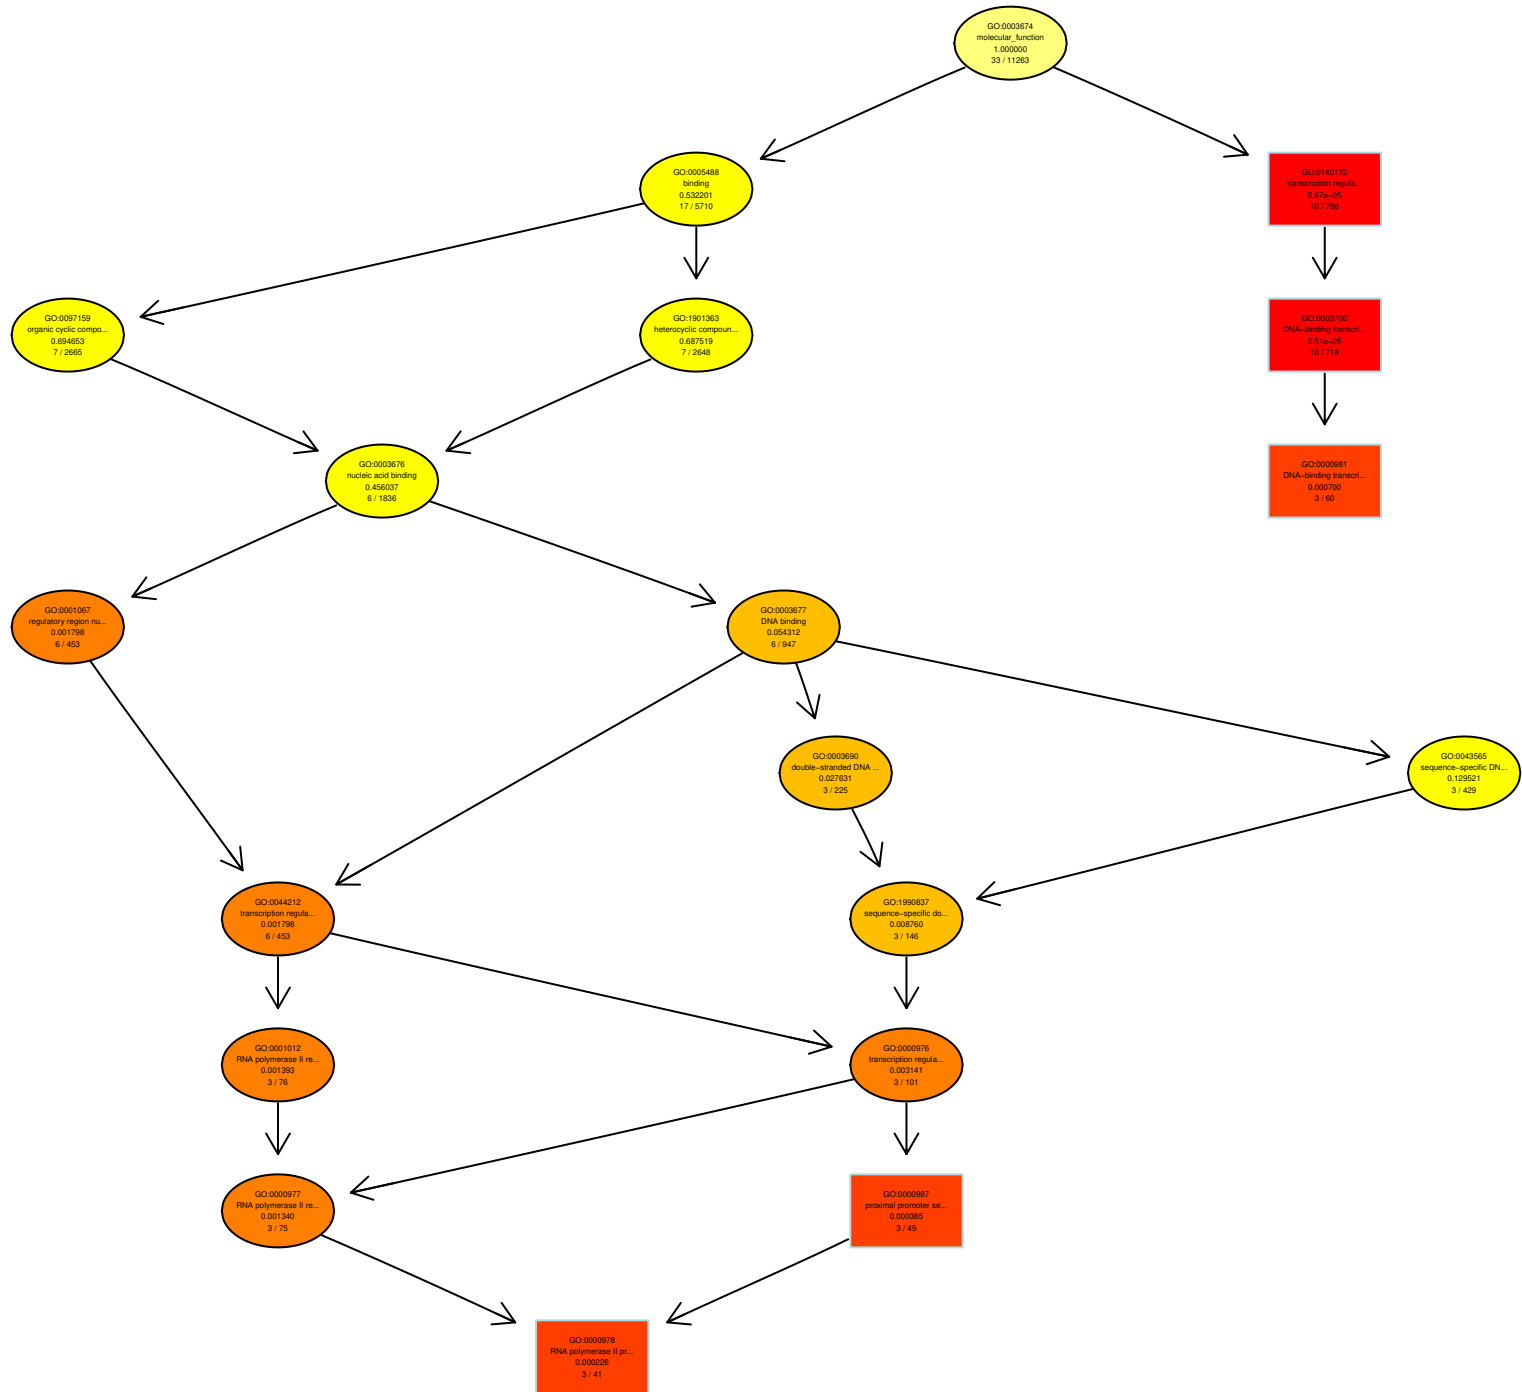

Supplement: PLD3-6-e396-s361.pdf [file PLD3-6-e396-s361.pdf]

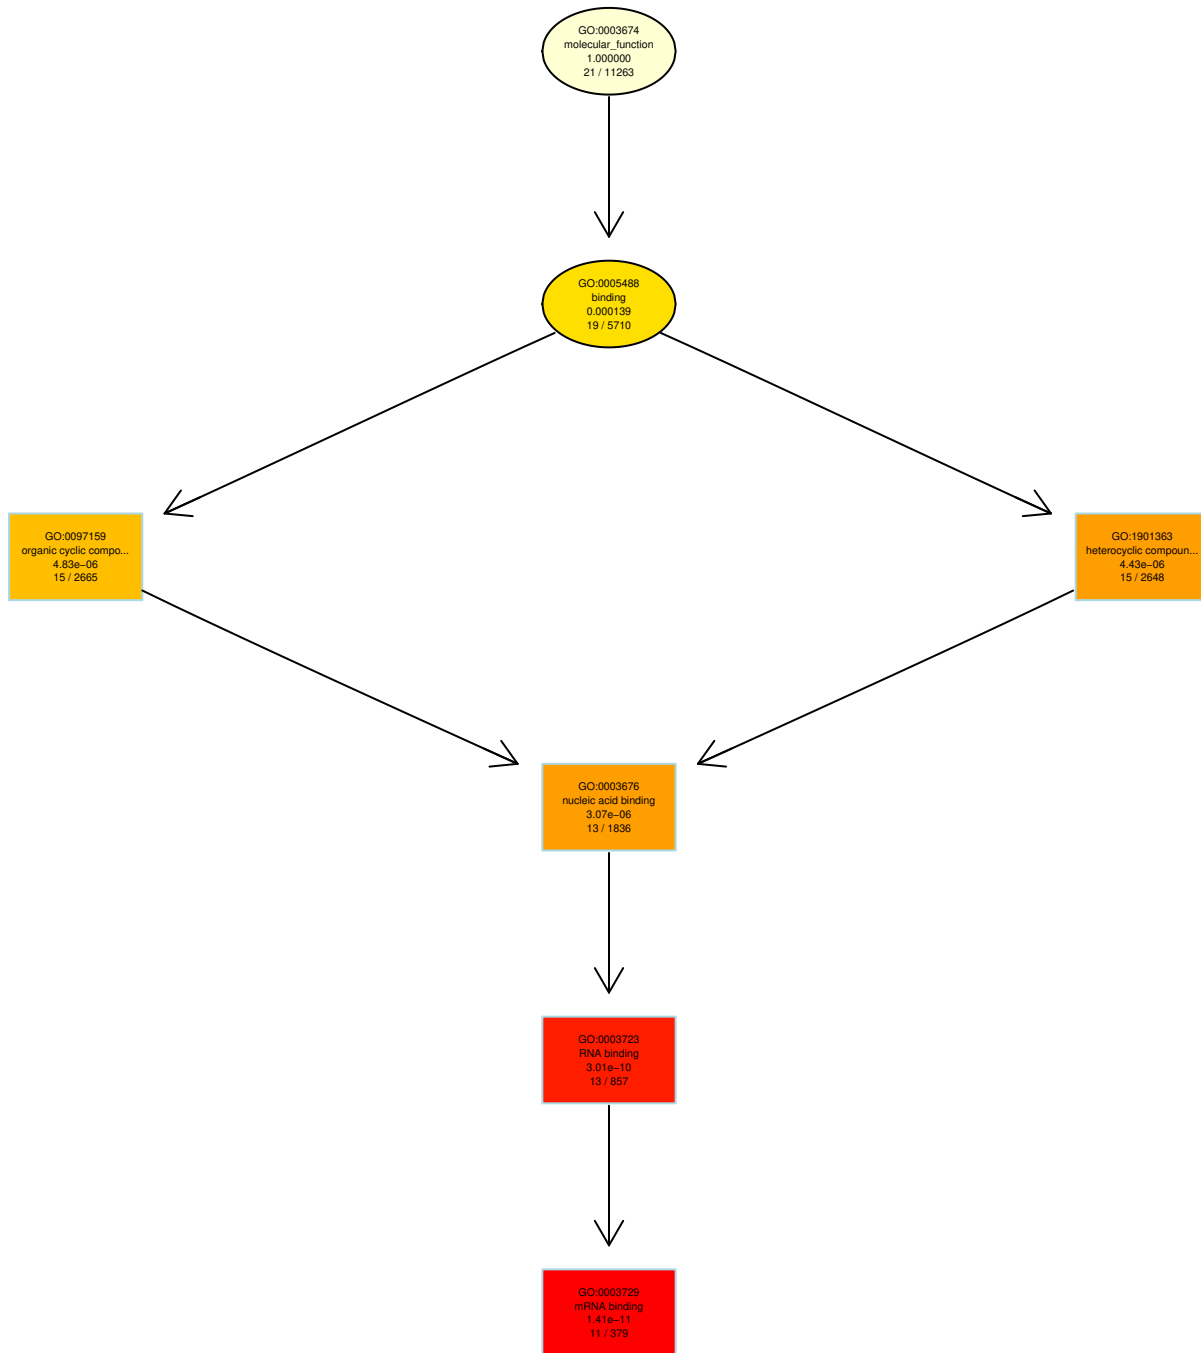

Supplement: PLD3-6-e396-s363.pdf [file PLD3-6-e396-s363.pdf]

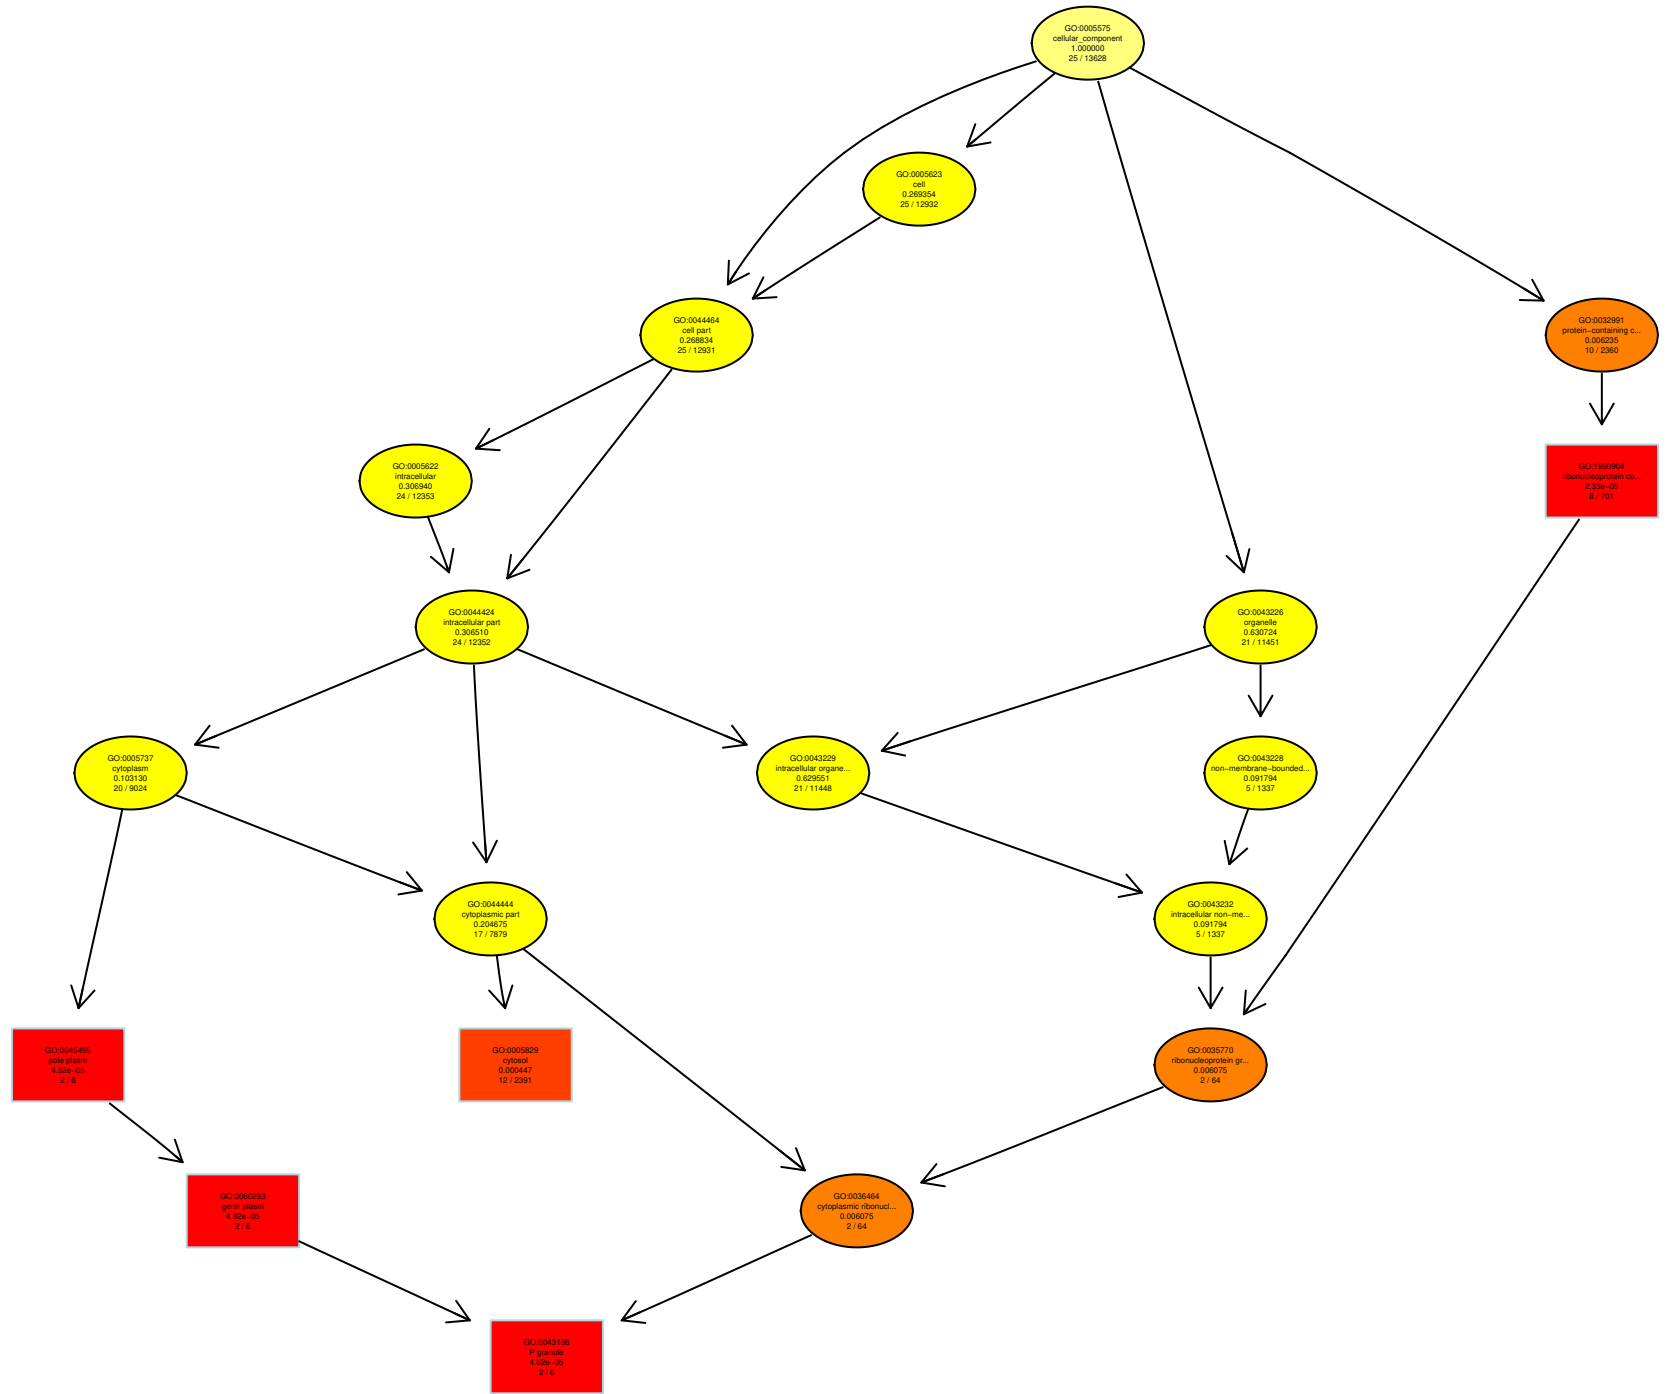

Supplement: PLD3-6-e396-s364.pdf [file PLD3-6-e396-s364.pdf]

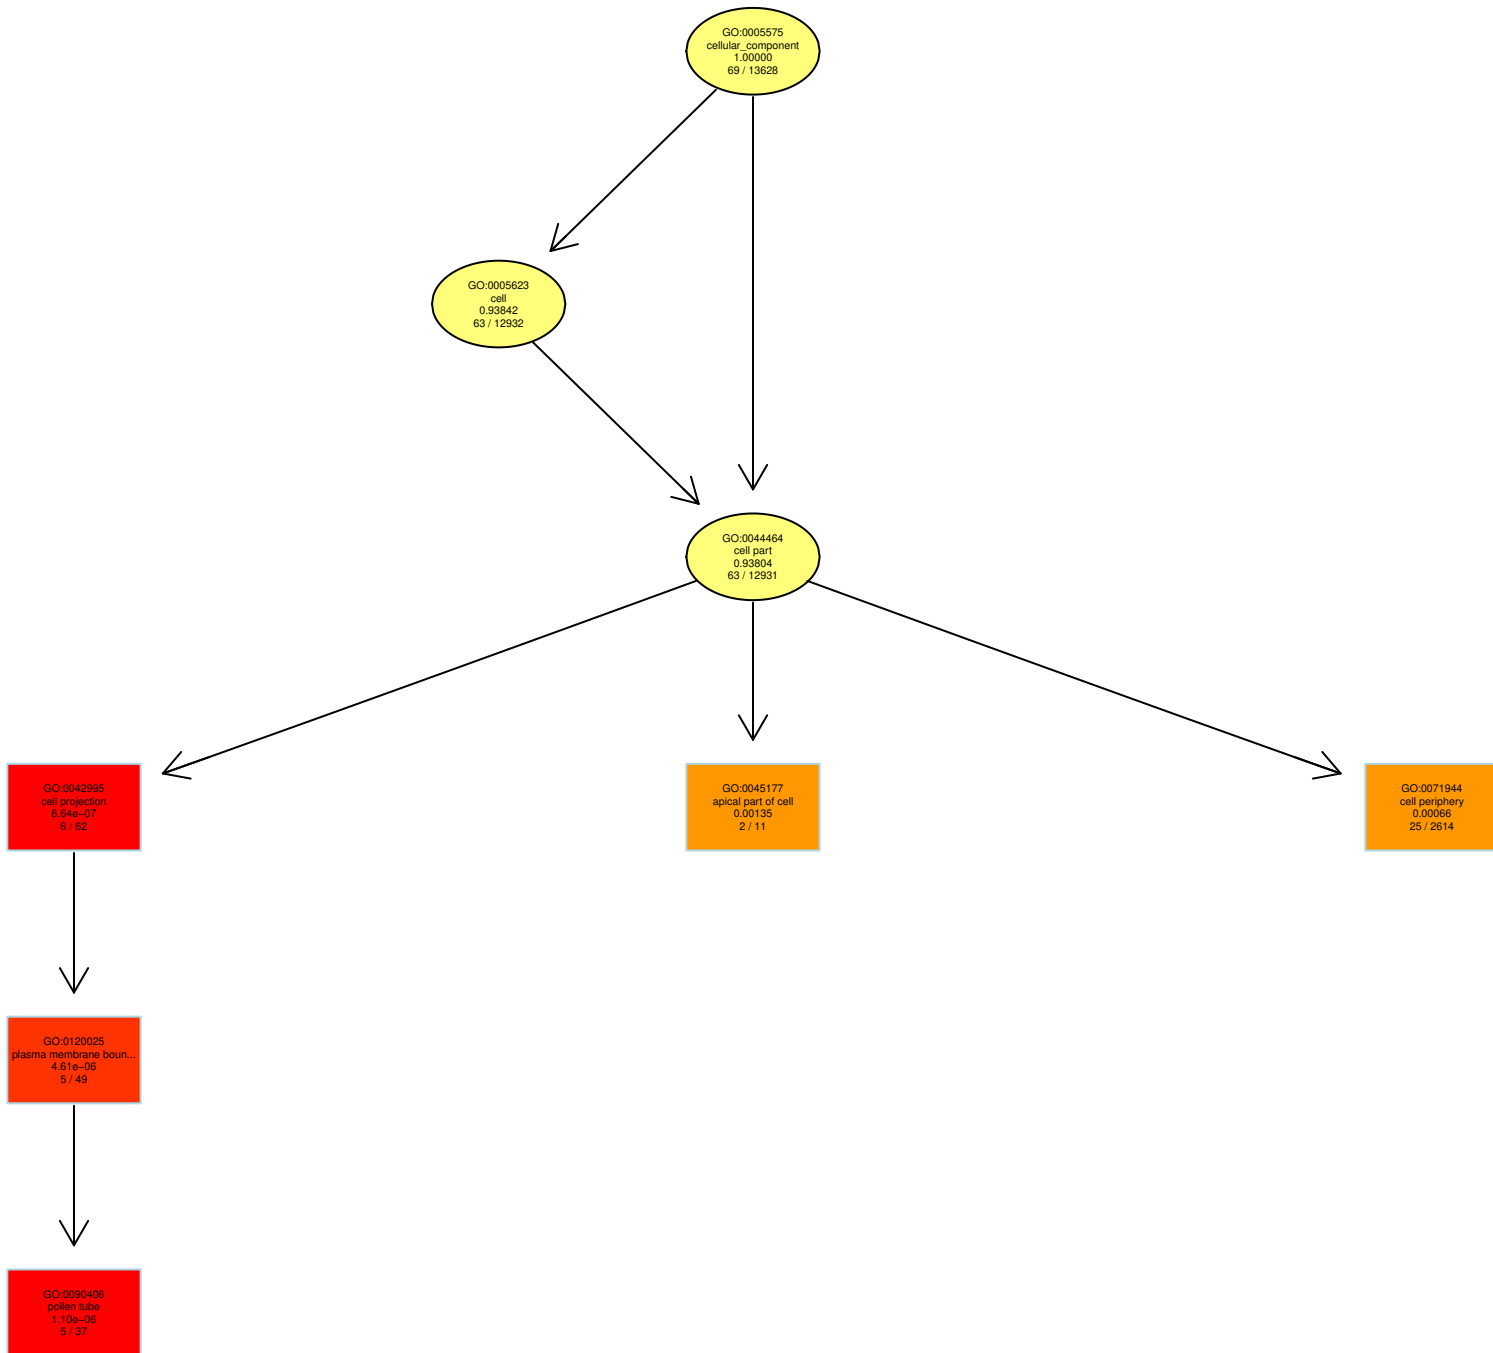

Supplement: PLD3-6-e396-s366.pdf [file PLD3-6-e396-s366.pdf]

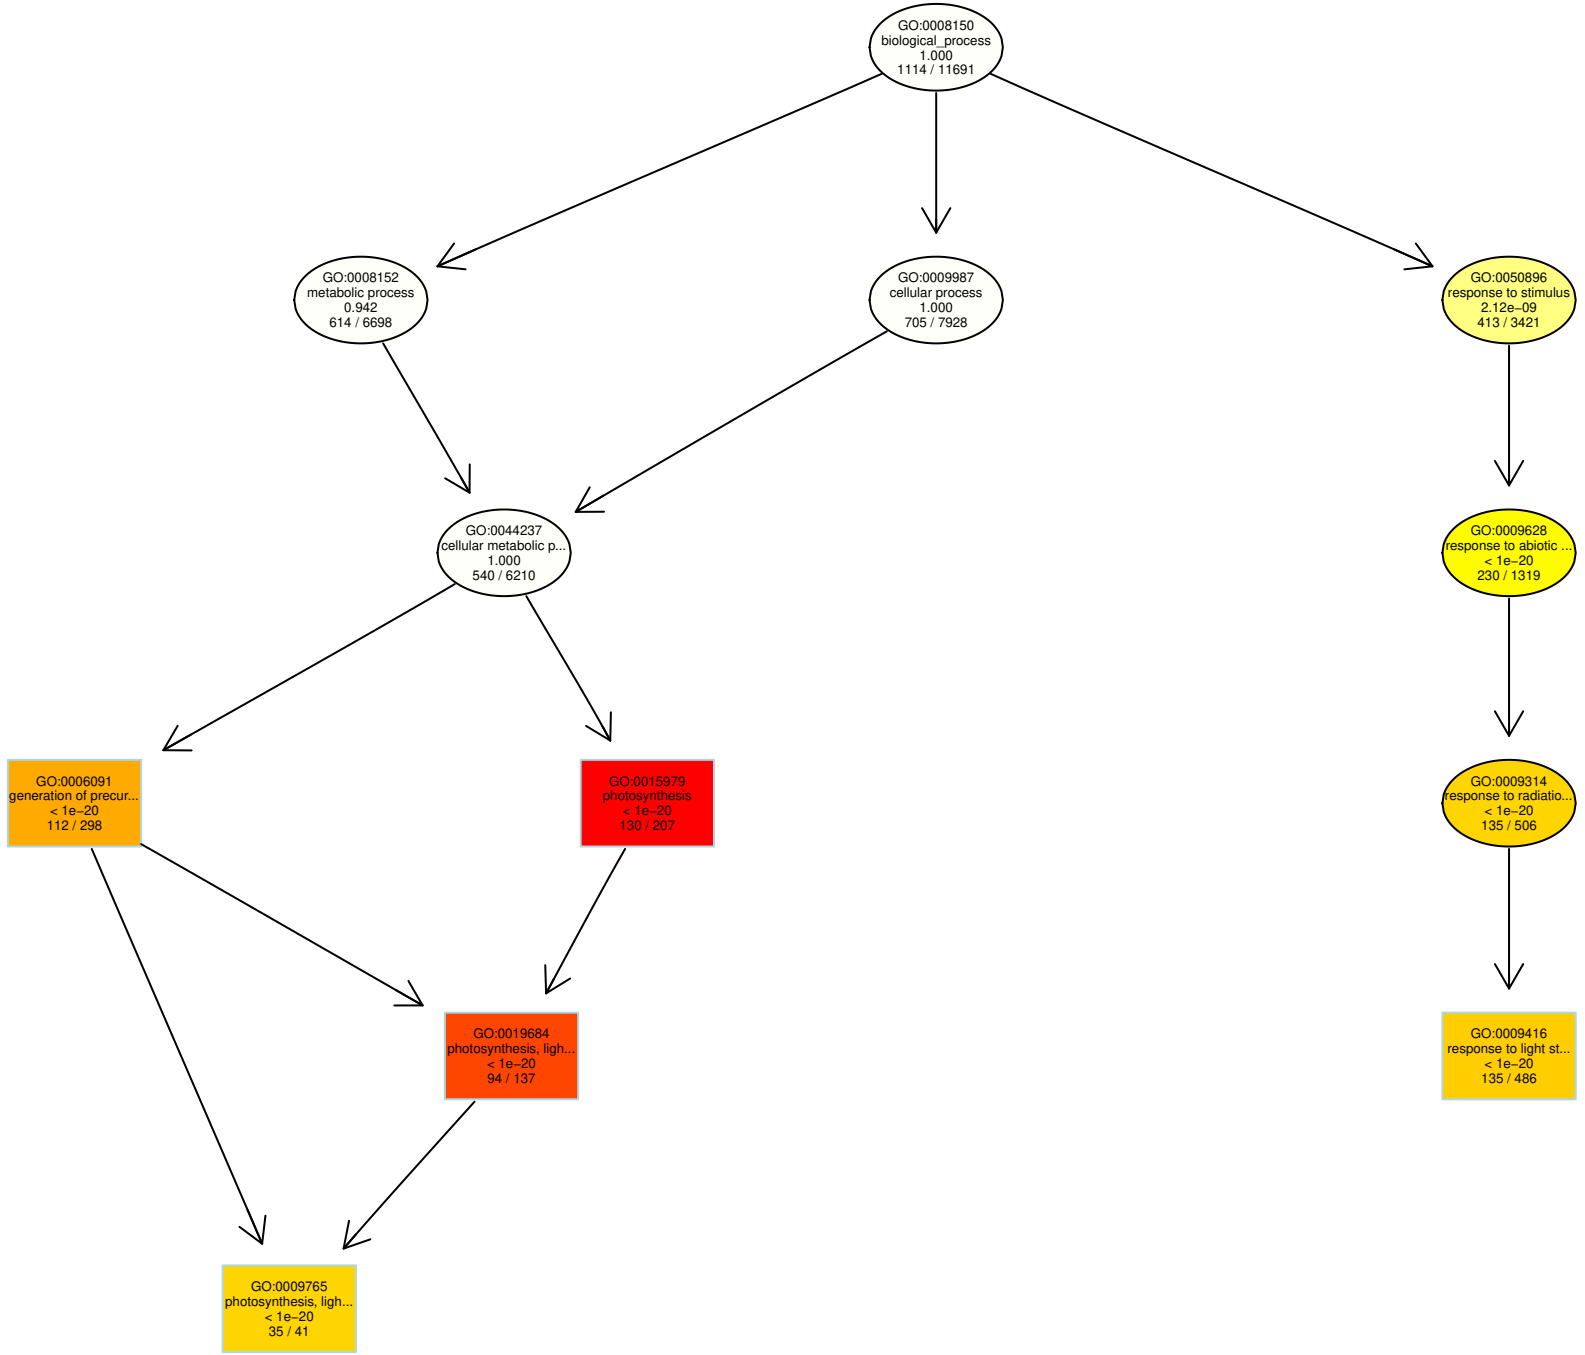

Supplement: PLD3-6-e396-s367.pdf [file PLD3-6-e396-s367.pdf]

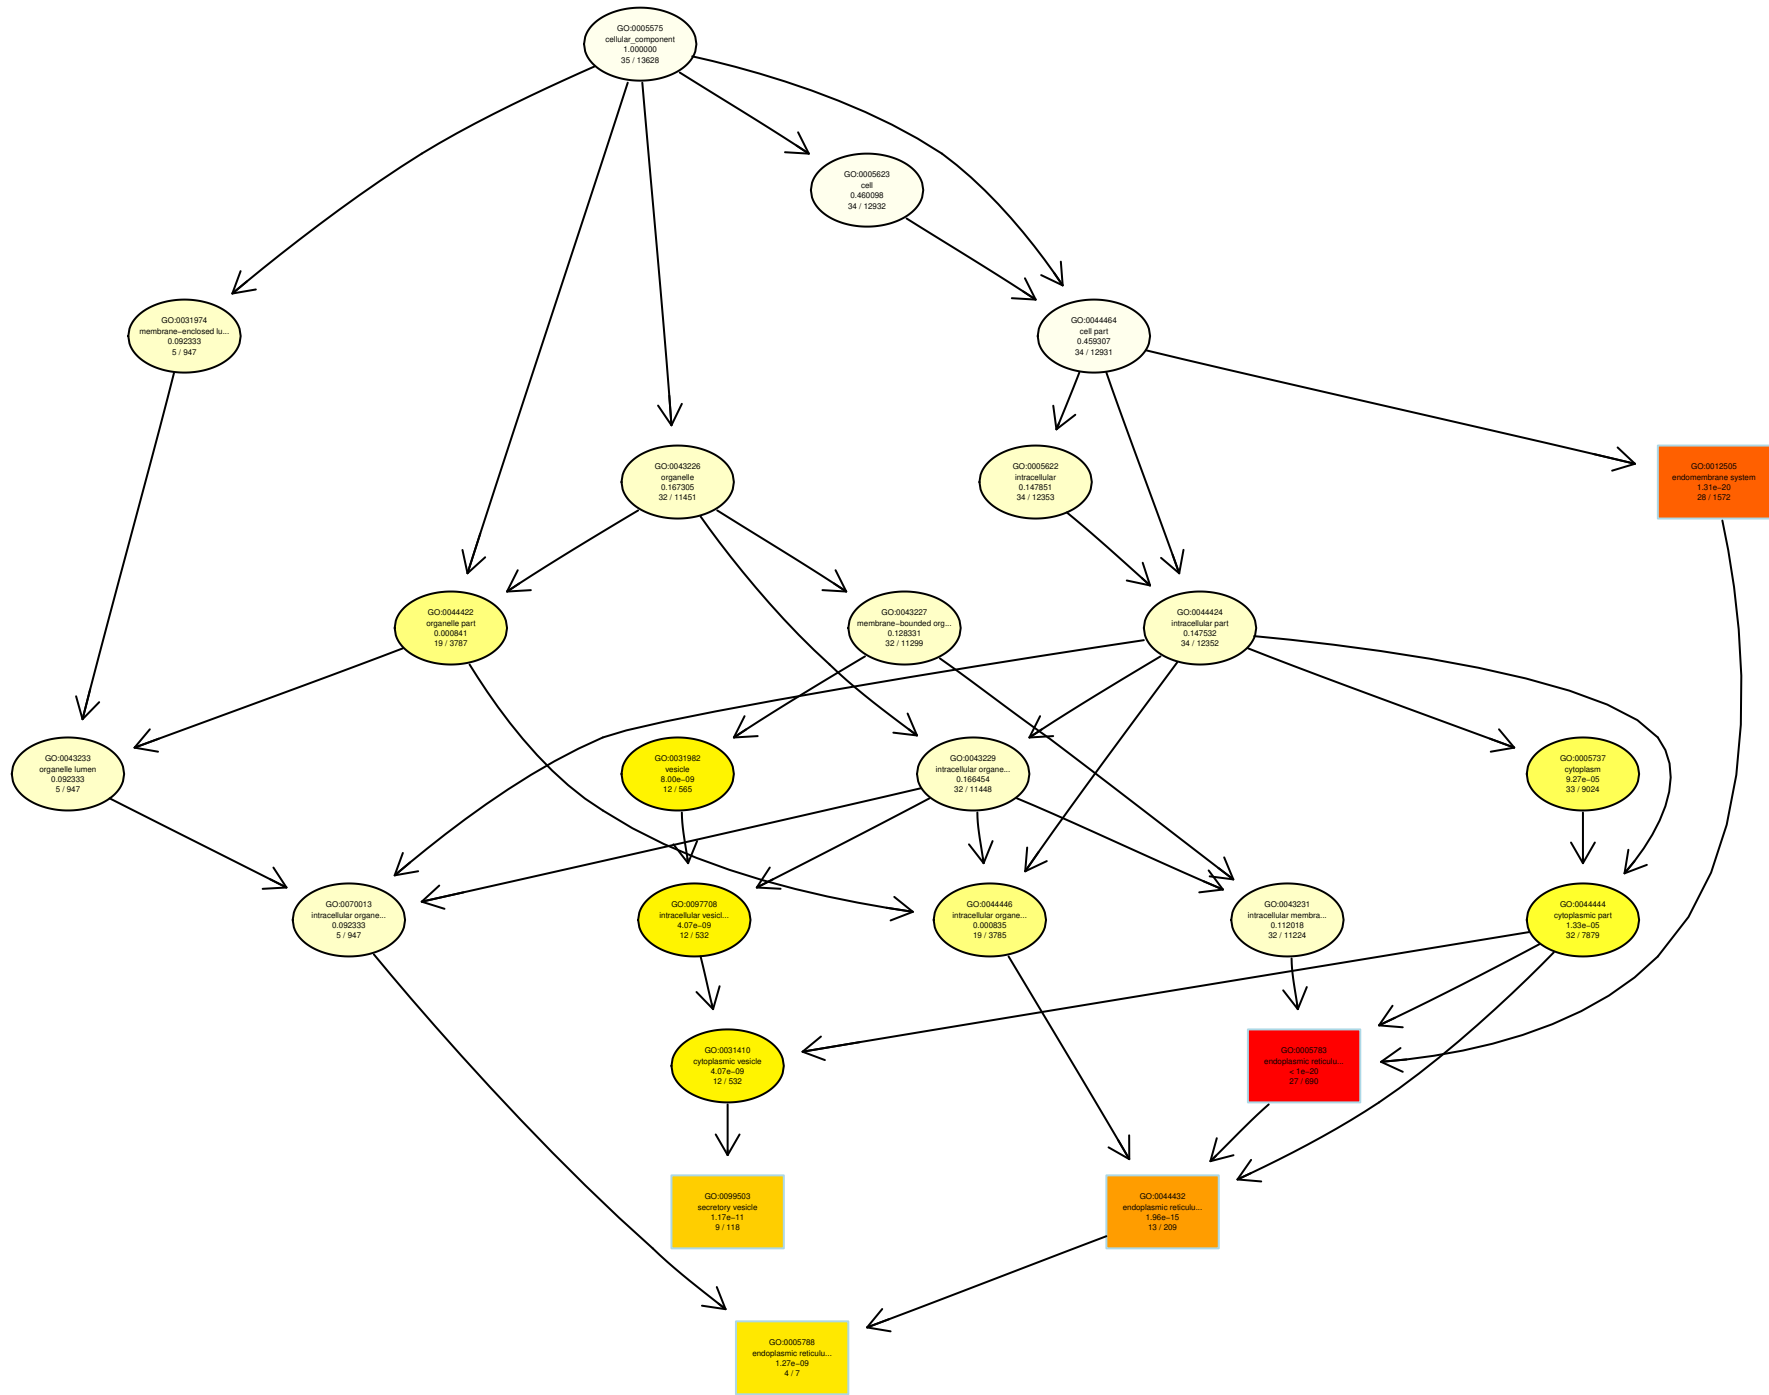

Supplement: PLD3-6-e396-s370.pdf [file PLD3-6-e396-s370.pdf]

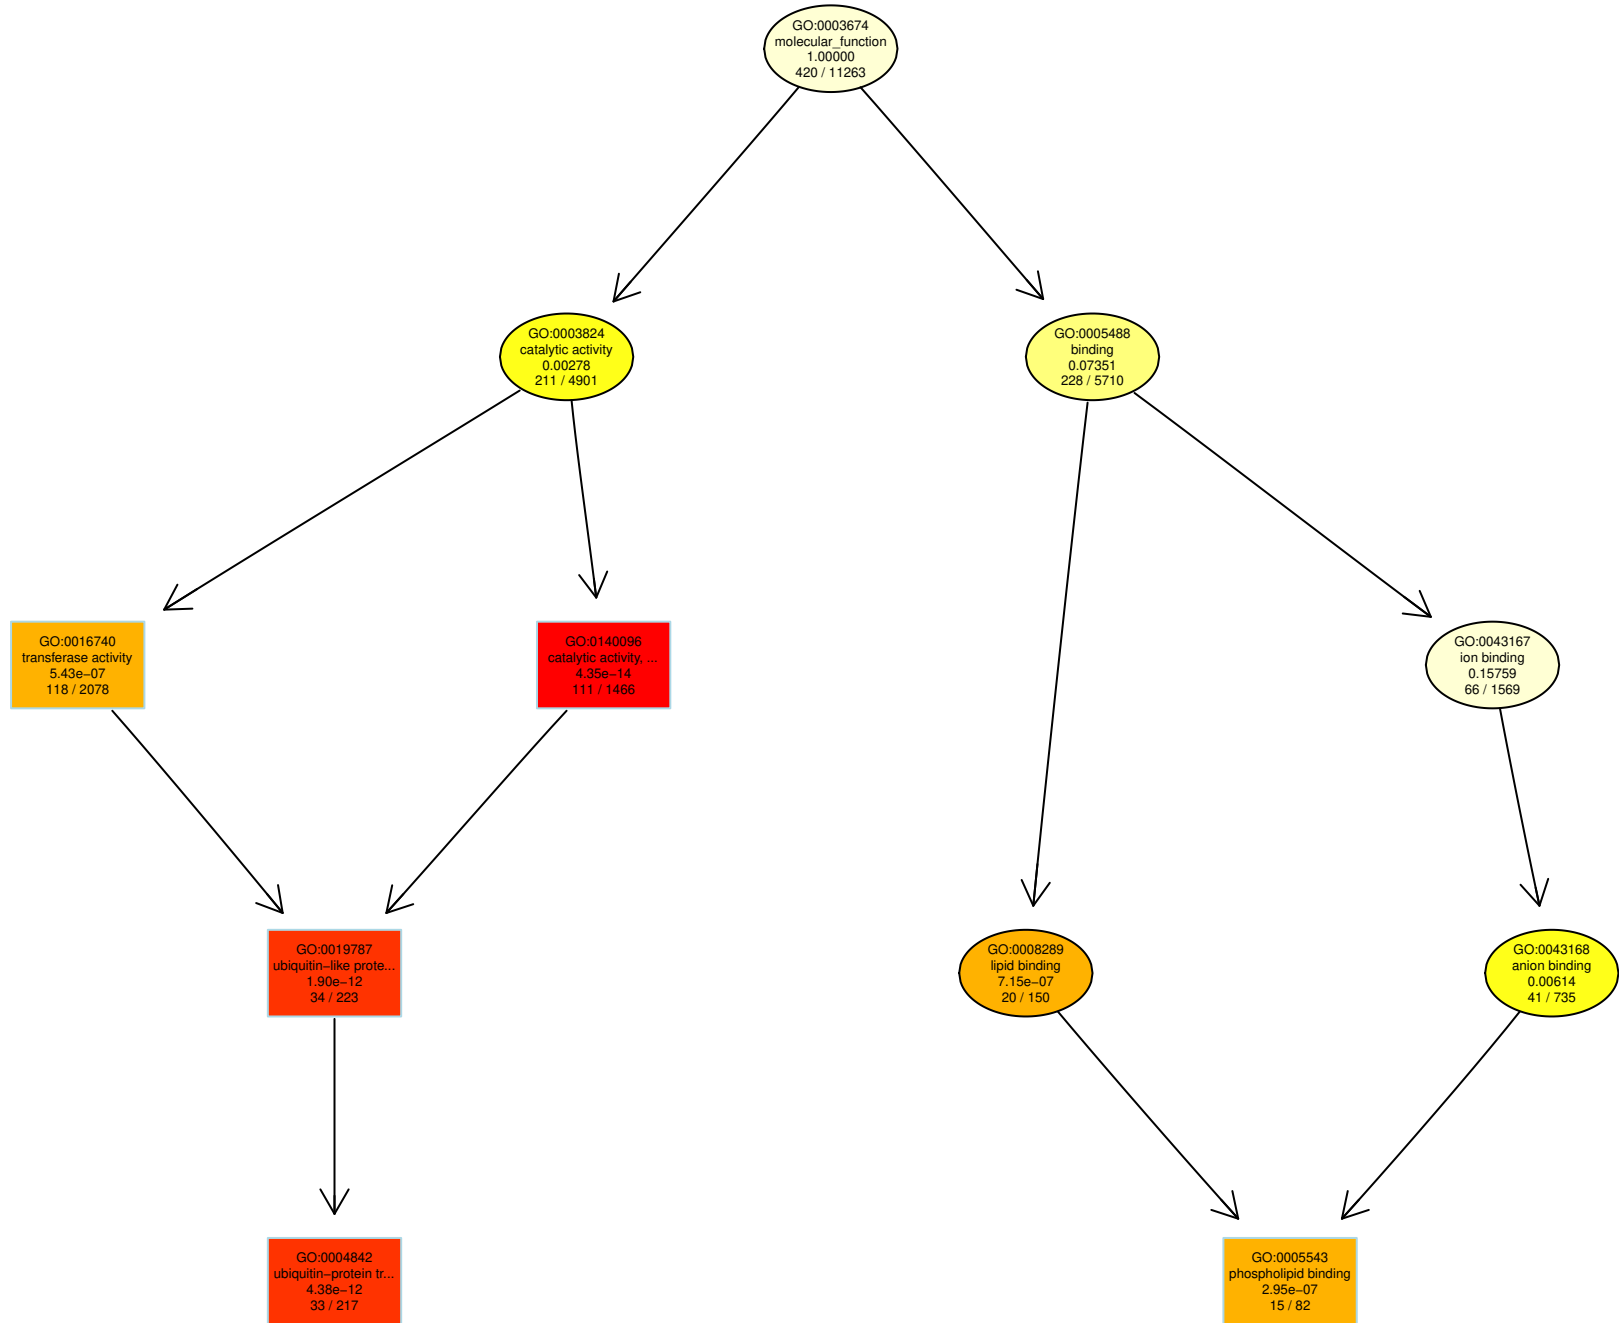

Supplement: PLD3-6-e396-s371.pdf [file PLD3-6-e396-s371.pdf]

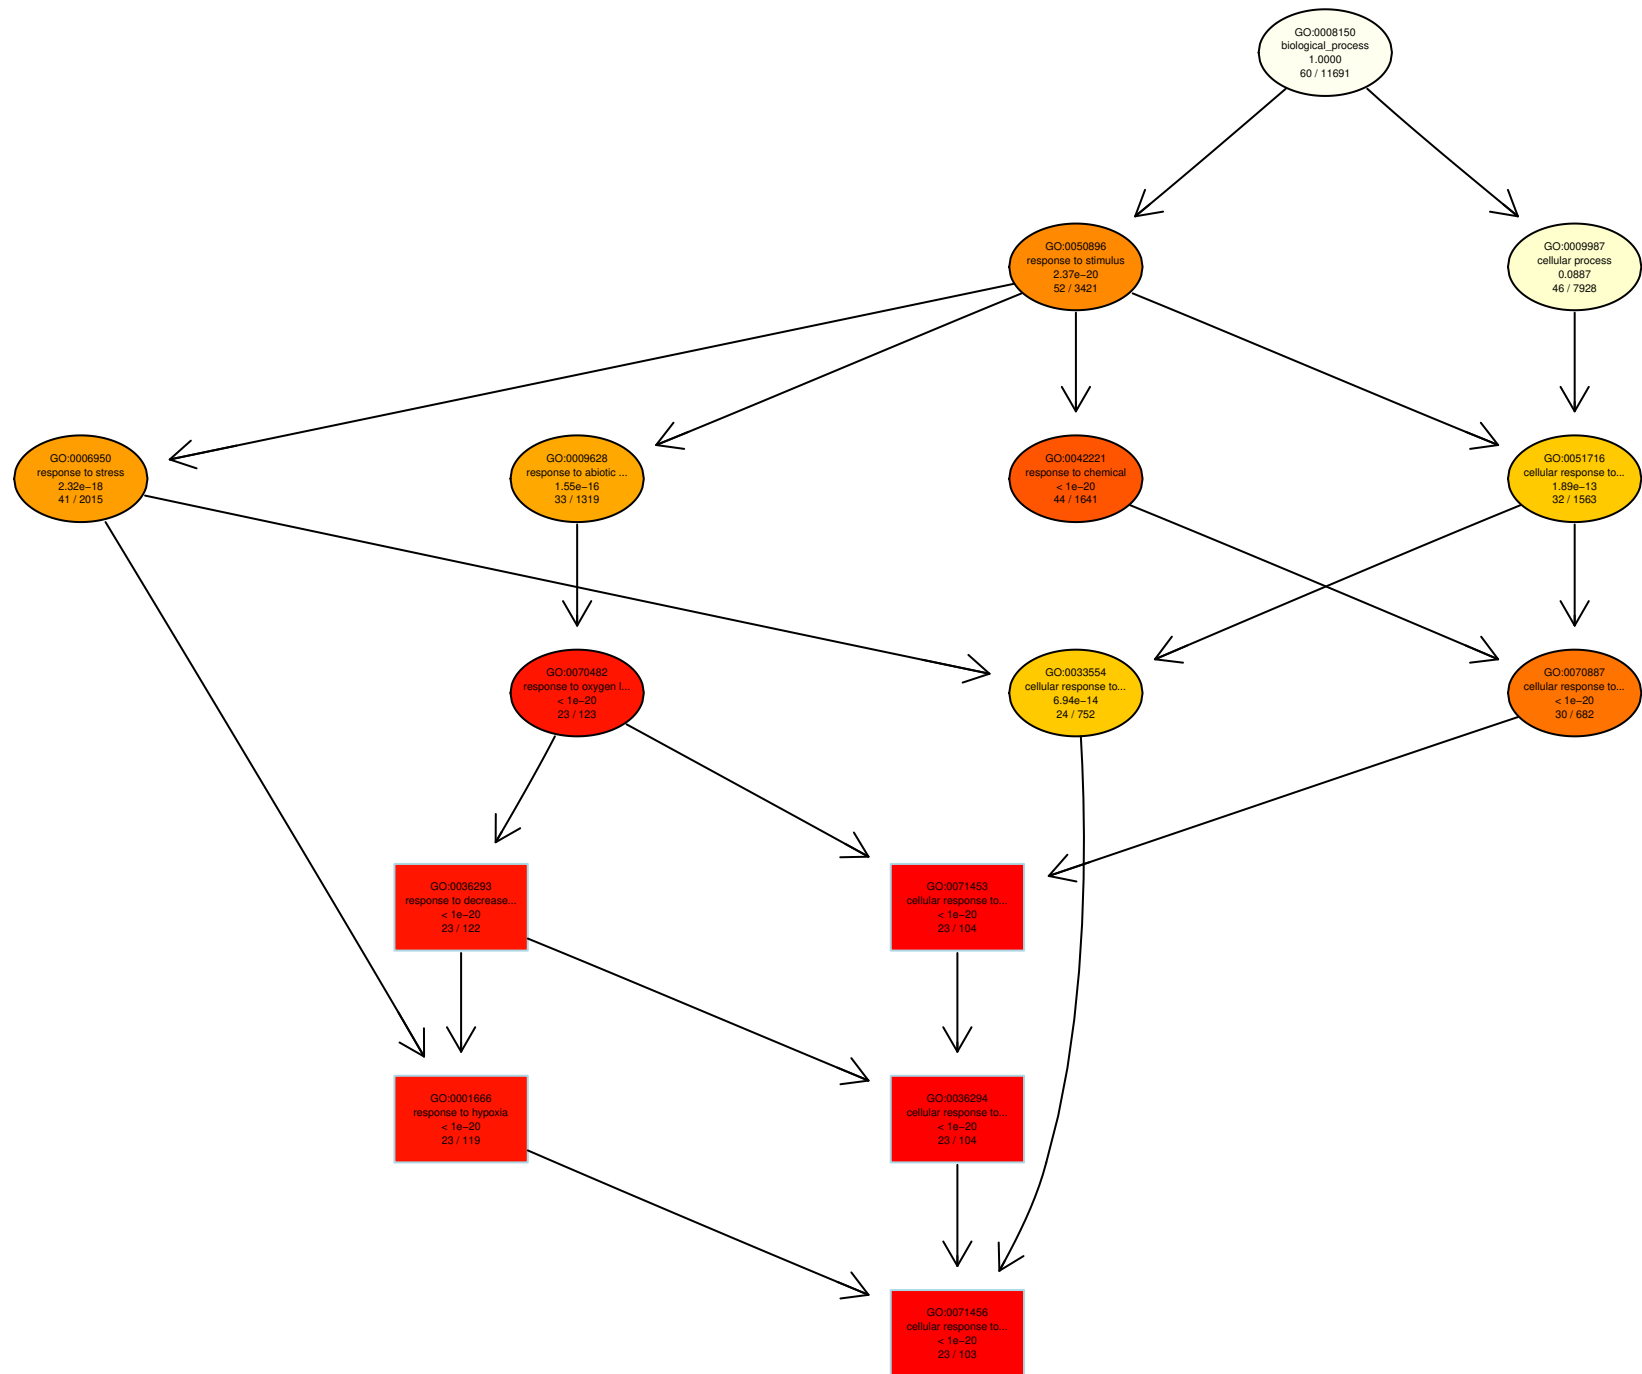

Supplement: PLD3-6-e396-s373.pdf [file PLD3-6-e396-s373.pdf]

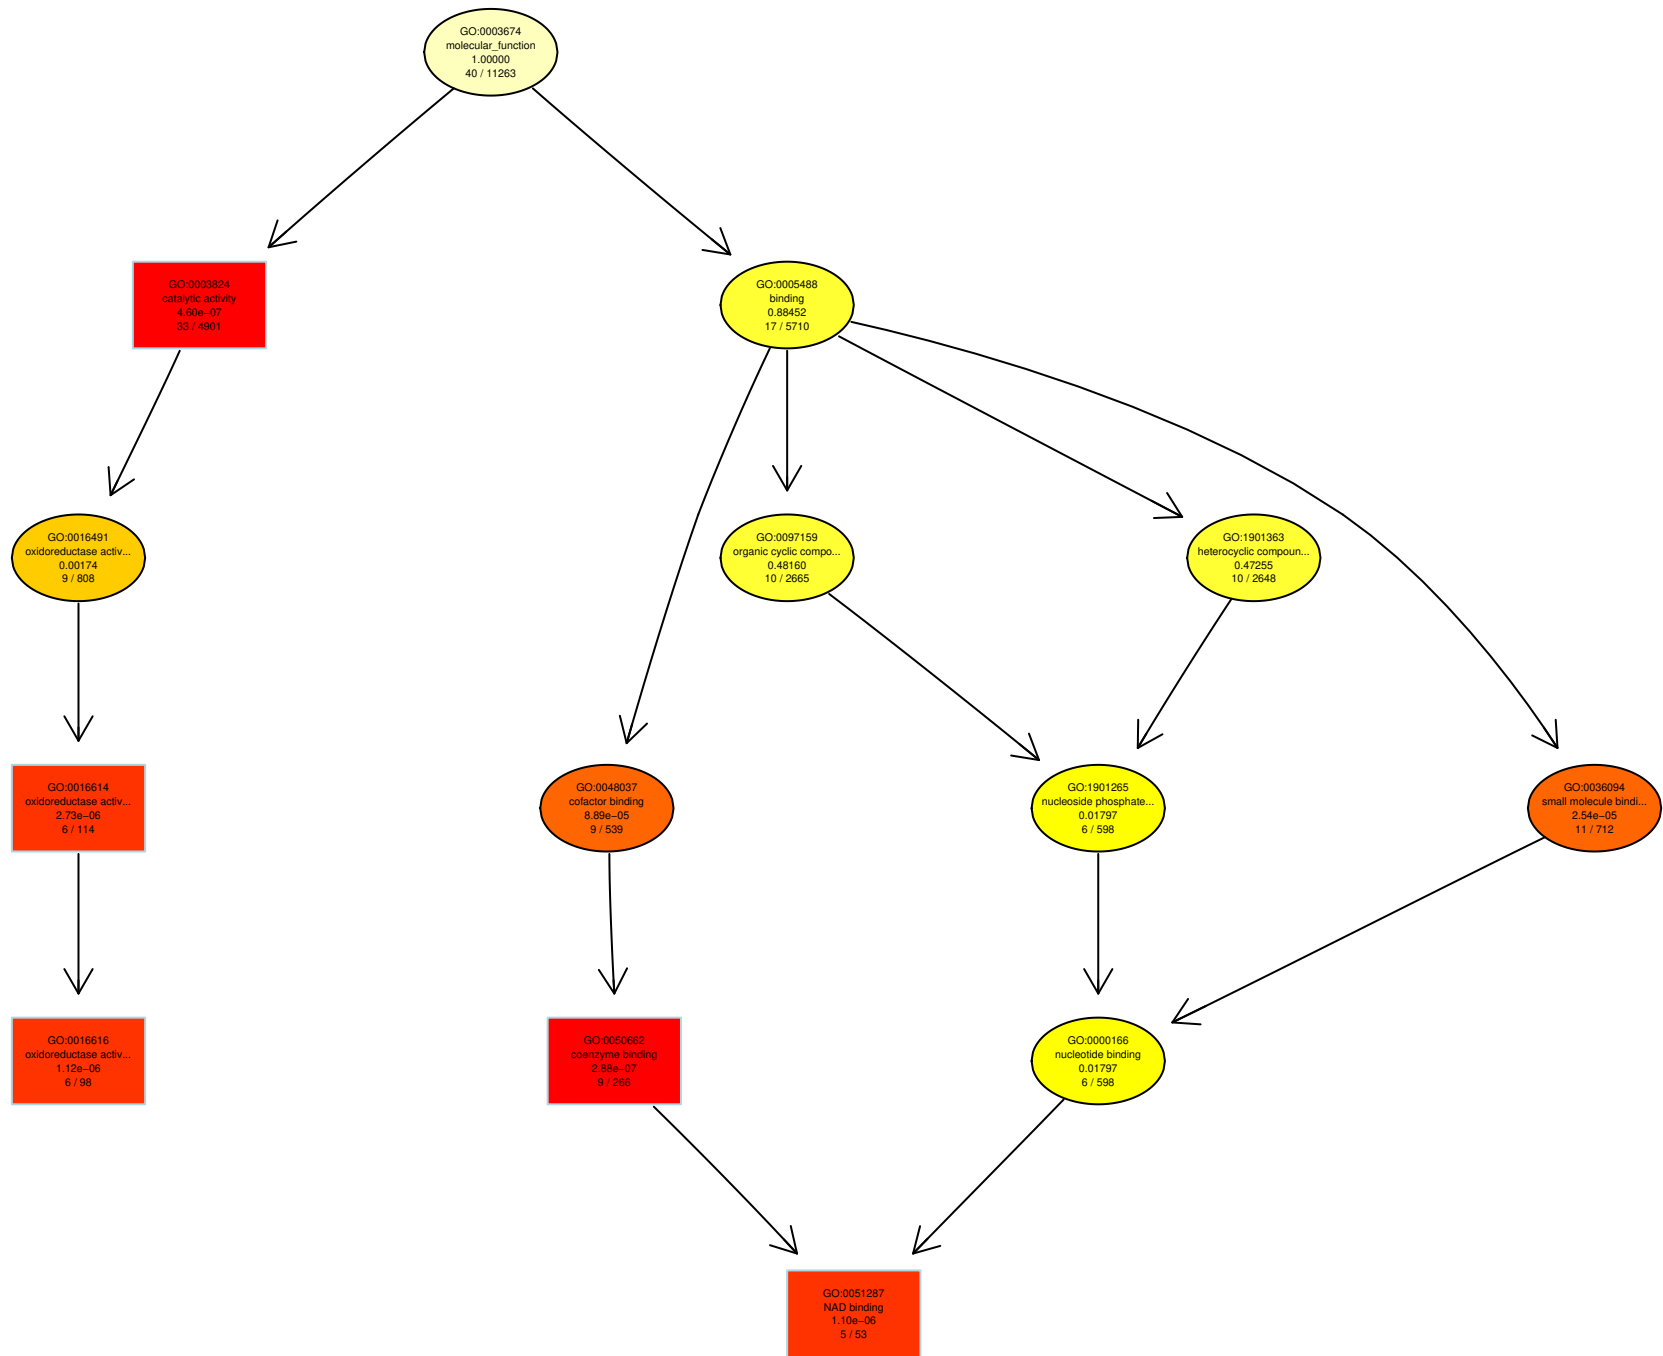

Supplement: PLD3-6-e396-s376.pdf [file PLD3-6-e396-s376.pdf]

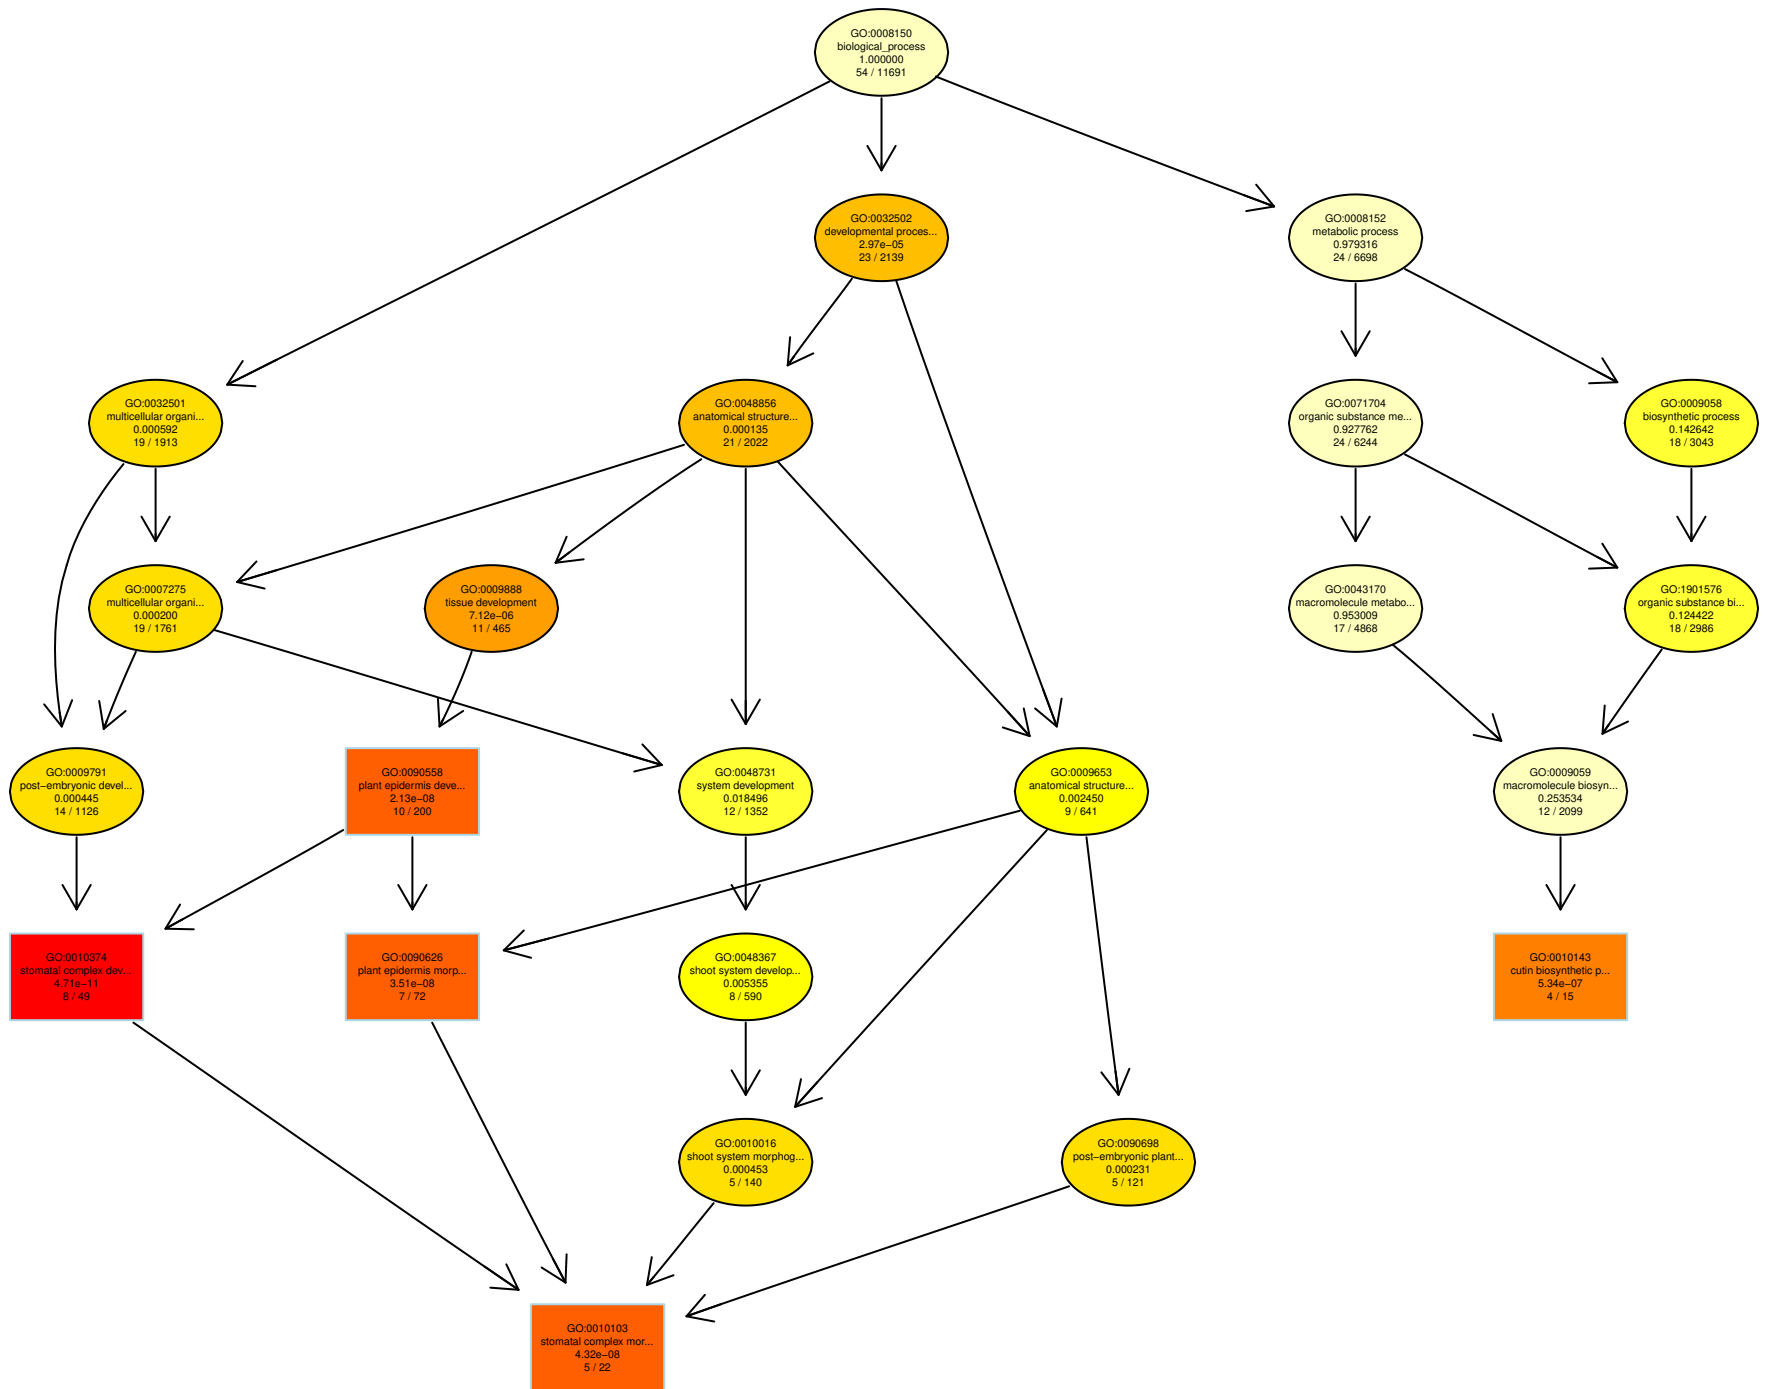

Supplement: PLD3-6-e396-s377.pdf [file PLD3-6-e396-s377.pdf]

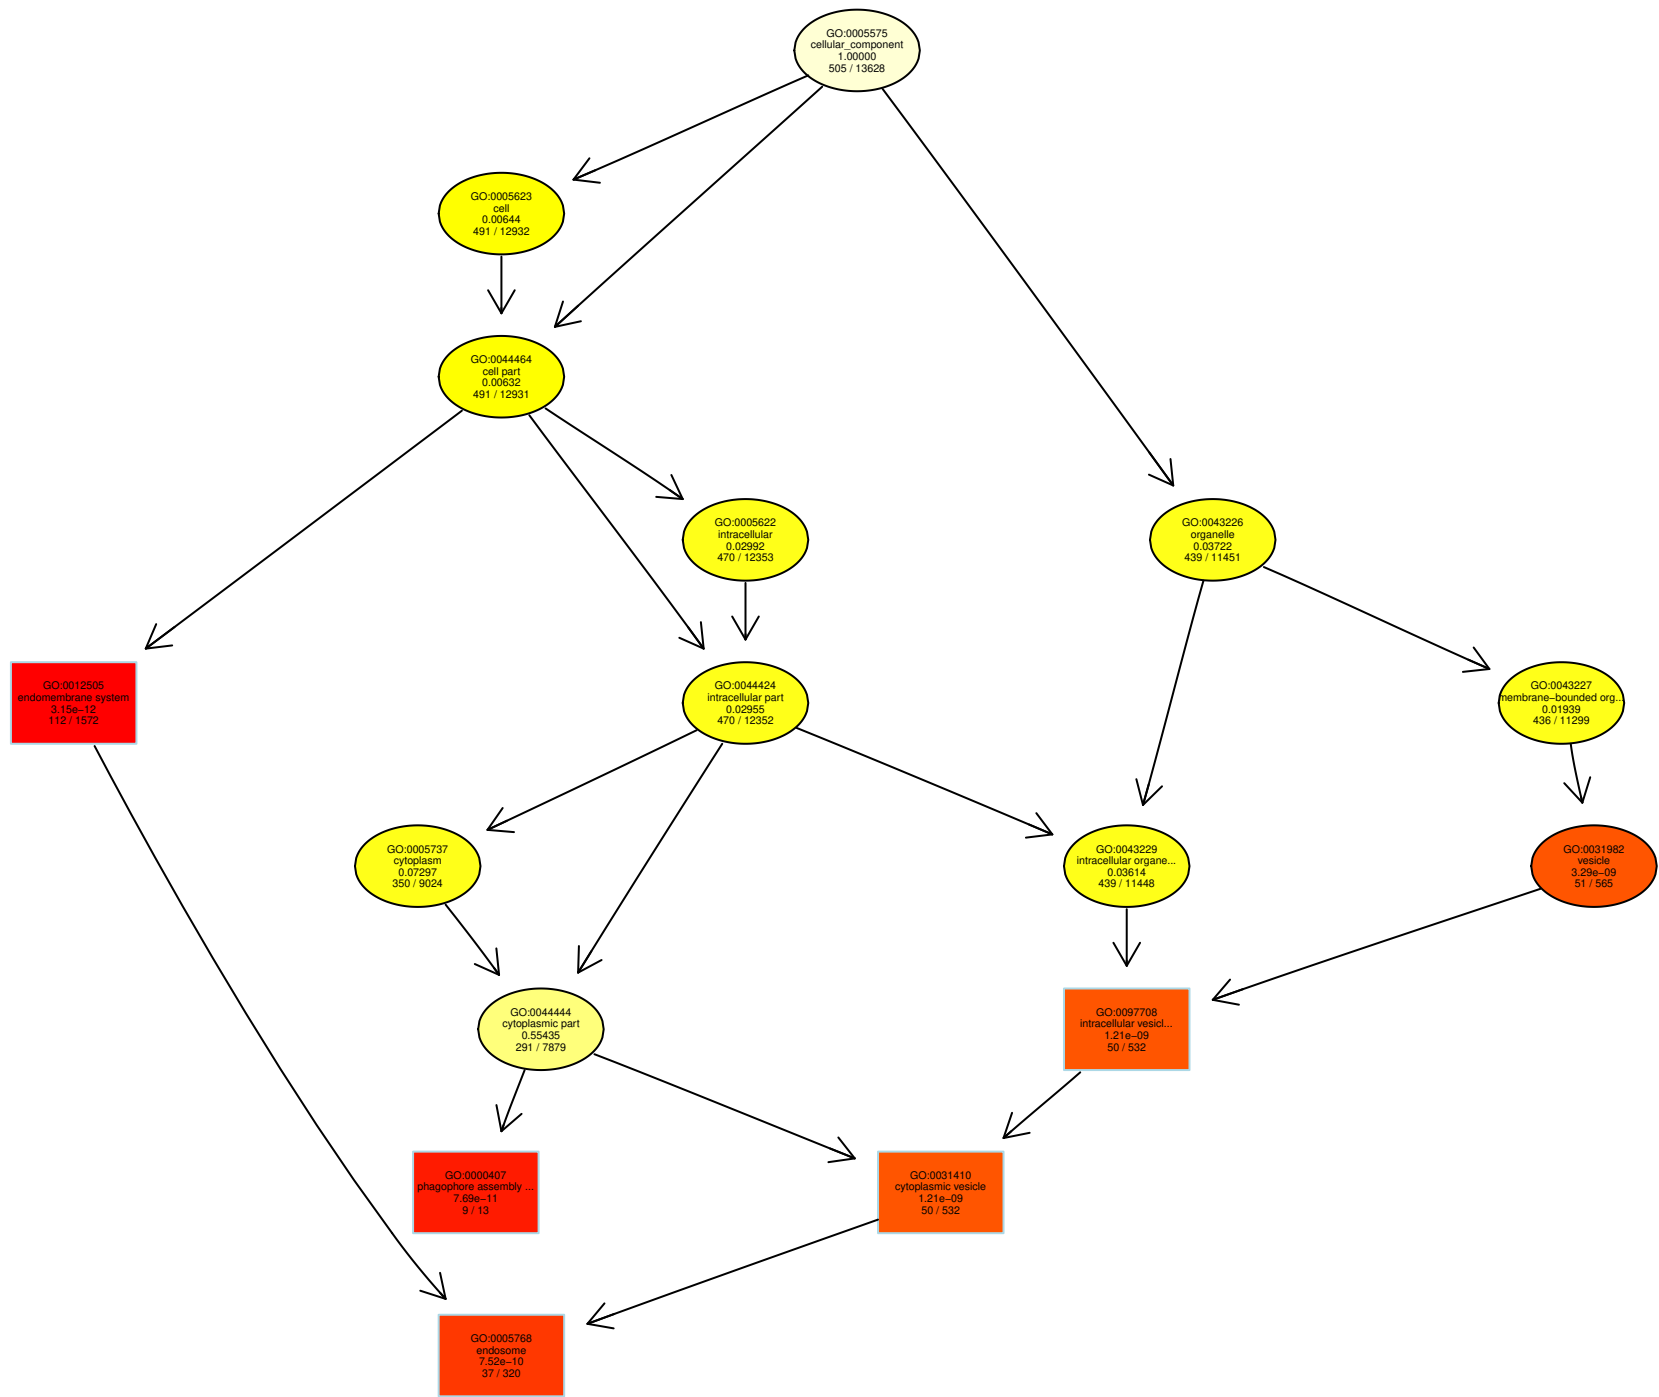

Supplement: PLD3-6-e396-s378.pdf [file PLD3-6-e396-s378.pdf]

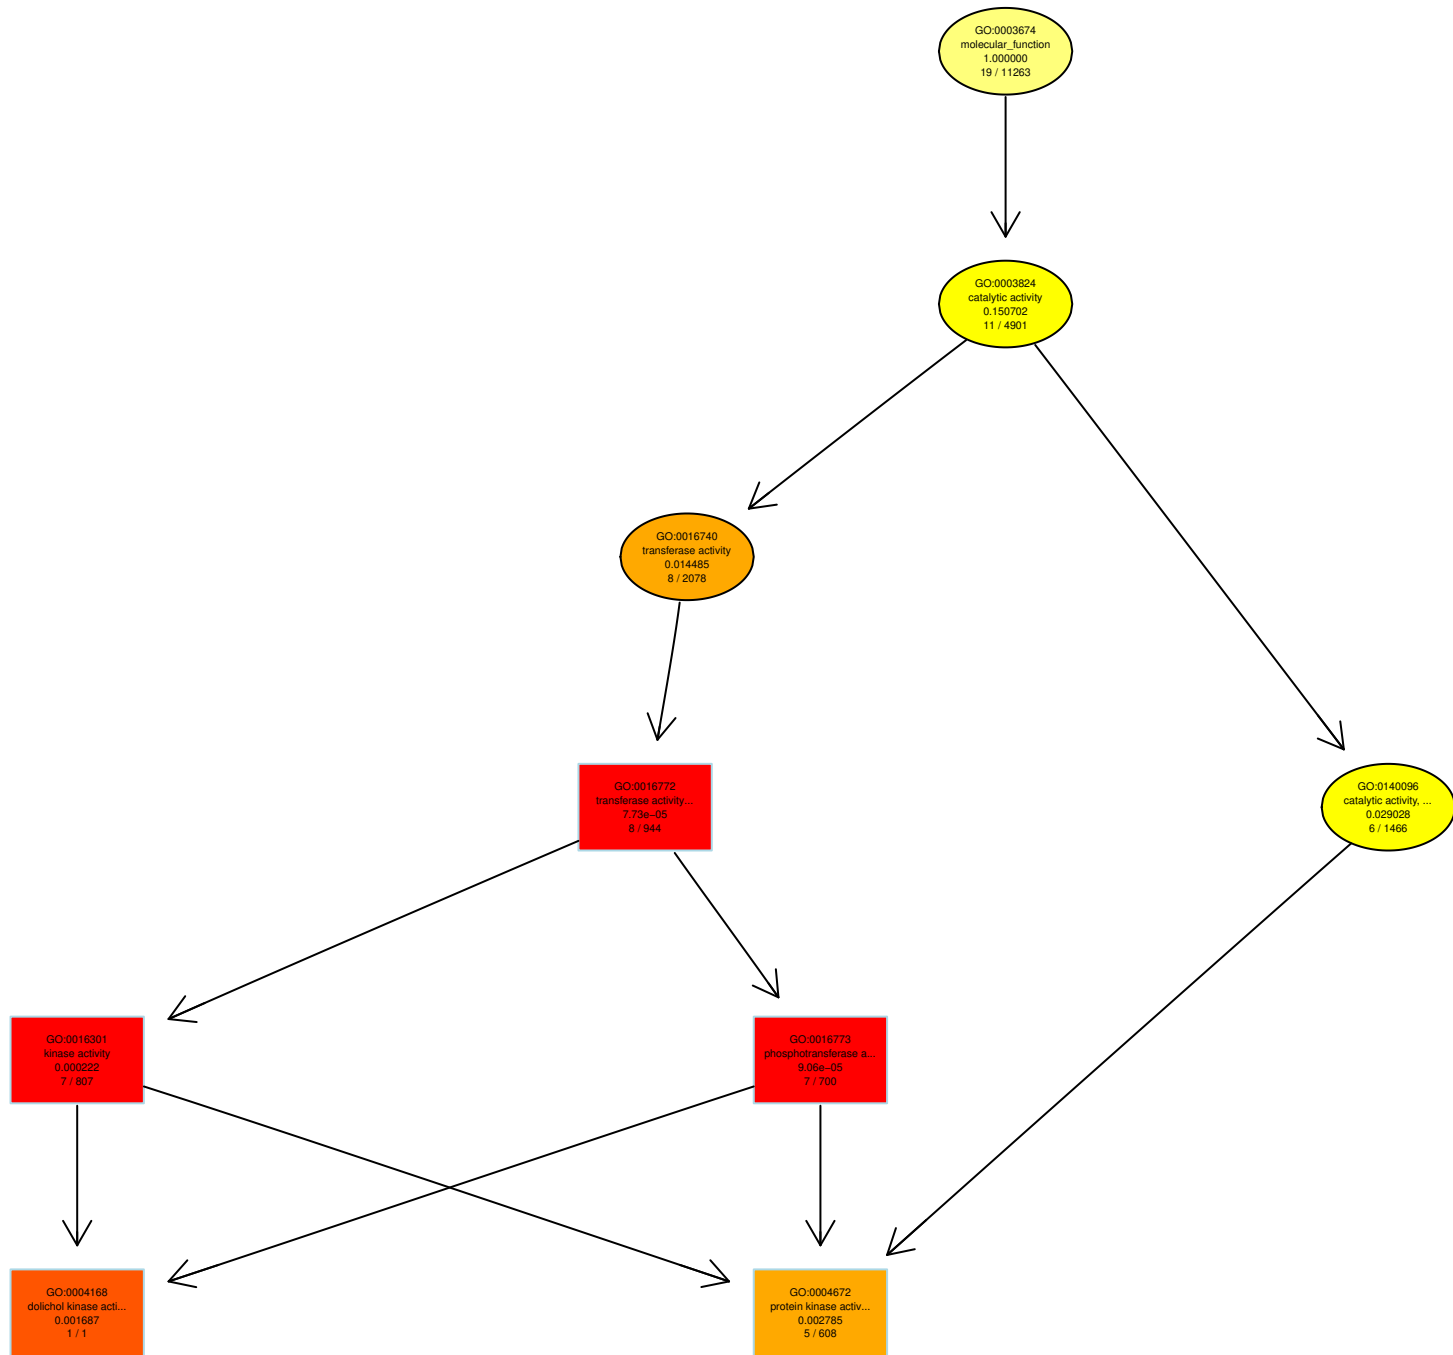

Supplement: PLD3-6-e396-s380.pdf [file PLD3-6-e396-s380.pdf]

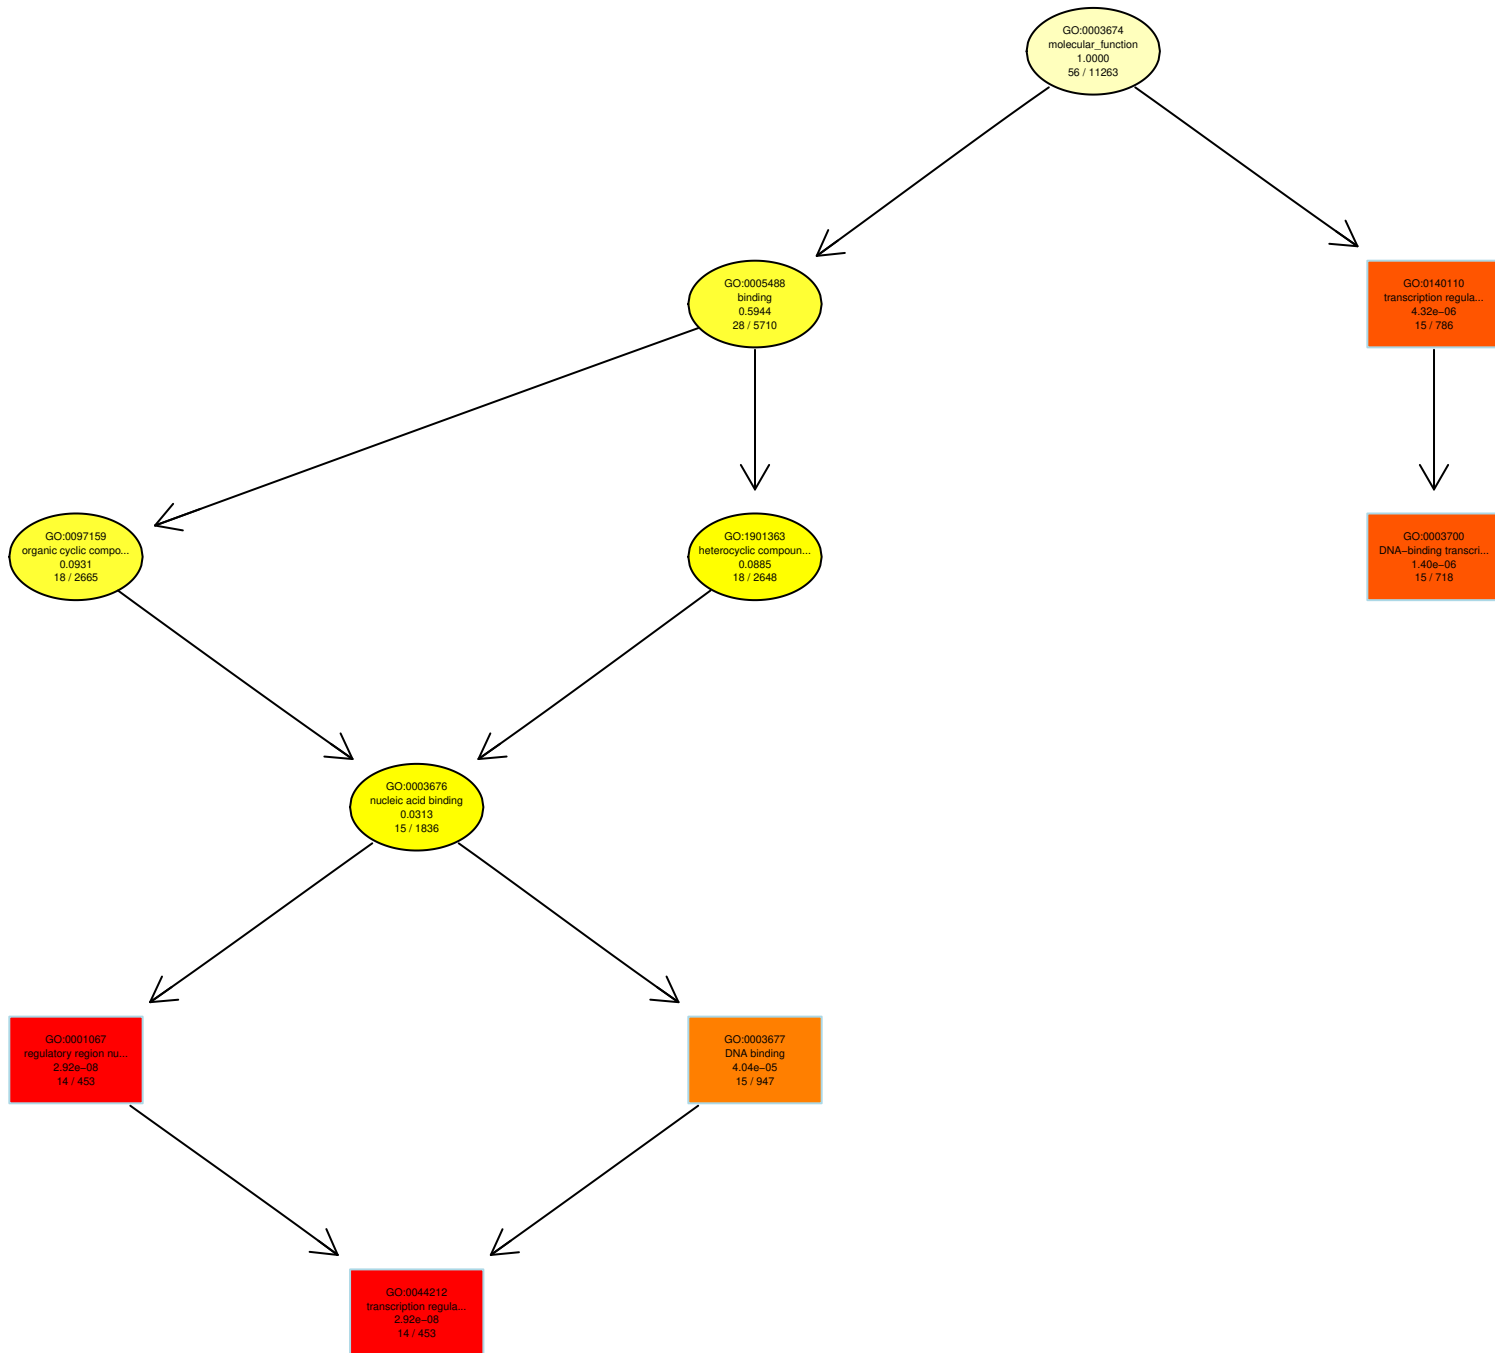

Supplement: PLD3-6-e396-s381.pdf [file PLD3-6-e396-s381.pdf]

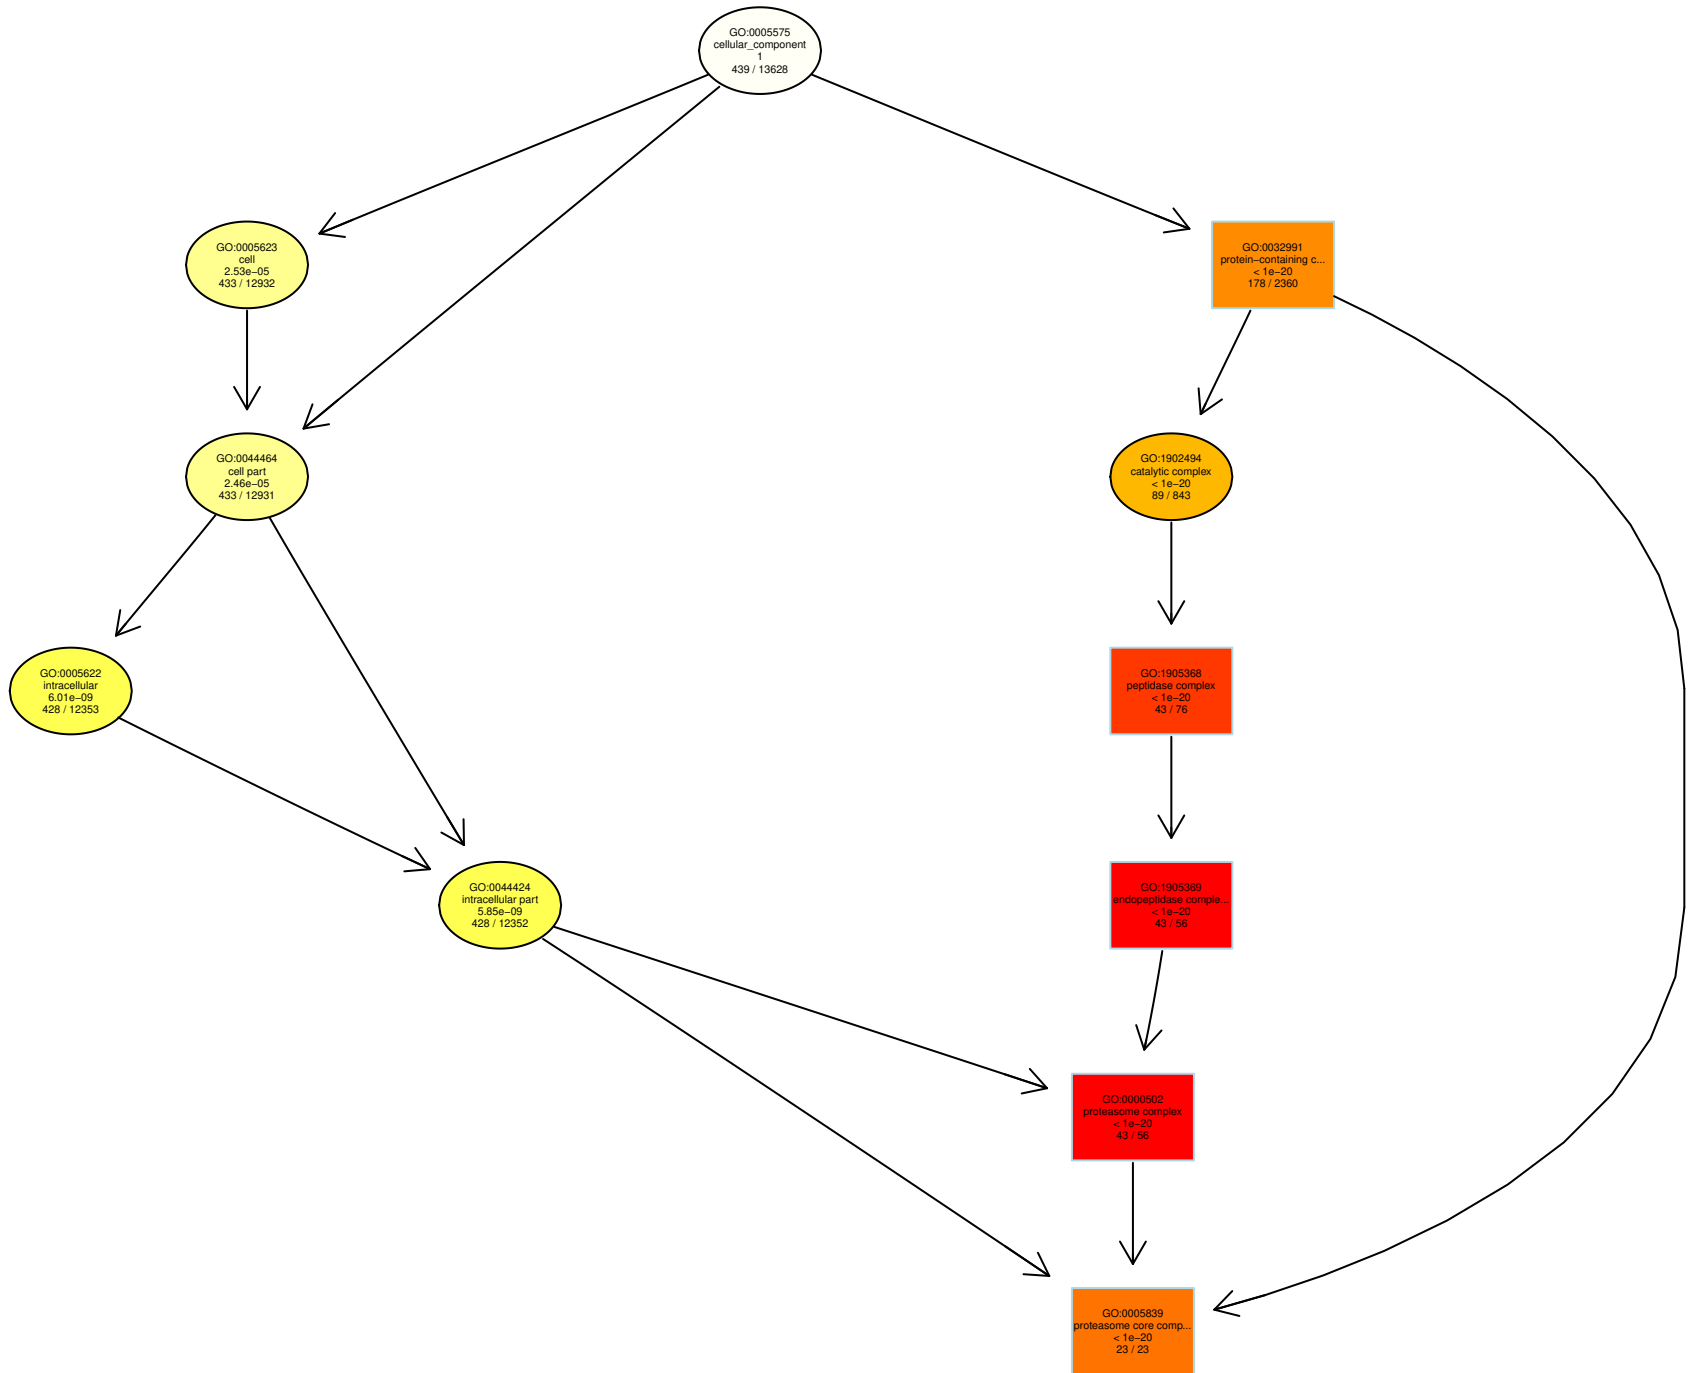

Supplement: PLD3-6-e396-s382.pdf [file PLD3-6-e396-s382.pdf]
